# Supplementary material
Source: PubMed Central journal article supplement (PMC3000614)
Supplement: NIHMS234792-supplement-Table_S1.pdf [file NIHMS234792-supplement-Table_S1.pdf]

Table S. Genes that are significantly different from the controls at 6 or 24 hours after GH treatment.

| Gene Expression | Probe ID    | Fold (6 HR) | P (6 HR) | Fold (24 HR) | P (24 HR) | Accession   | Gene Symbol          | Gene Description                                                   |
|-----------------|-------------|-------------|----------|--------------|-----------|-------------|----------------------|--------------------------------------------------------------------|
| Up at 6 hrs     | A_65_P04510 | 3.84        | 0.048    |              |           |             | Fzd10                | UNKNOWN                                                            |
| Up at 6 hrs     | A_65_P00681 | 3.79        | 0.041    |              |           |             |                      | UNKNOWN                                                            |
| Up at 6 hrs     | A_65_P06015 | 3.75        | 0.035    |              |           |             |                      | UNKNOWN                                                            |
| Up at 6 hrs     | A_65_P03378 | 3.62        | 0.033    |              |           | NM_021318.1 | Act                  | Mus musculus activator of CREM in testis (Act-pending), mRNA       |
| Up at 6 hrs     | A_65_P00605 | 3.55        | 0.046    |              |           |             |                      | Intronic in U011495                                                |
| Up at 6 hrs     | A_65_P09235 | 3.45        | 0.032    |              |           |             | D12Erttd123e         | Intronic in U014142                                                |
| Up at 6 hrs     | A_65_P04215 | 3.40        | 0.001    |              |           |             |                      | UNKNOWN                                                            |
| Up at 6 hrs     | A_65_P03274 | 3.28        | 0.027    |              |           |             |                      | UNKNOWN                                                            |
| Up at 6 hrs     | A_65_P00682 | 3.16        | 0.044    |              |           |             |                      | Intronic in U033204                                                |
| Up at 6 hrs     | A_65_P07663 | 3.16        | 0.038    |              |           | XM_128751.2 | Crim1                | CYSTEINE-RICH REPEAT-CONTAINING PROTEIN CRIM1 PRECURSOR (FRAGMENT) |
| Up at 6 hrs     | A_65_P02995 | 3.14        | 0.020    |              |           |             |                      | Intronic in U042649                                                |
| Up at 6 hrs     | A_65_P00693 | 3.13        | 0.038    |              |           |             |                      | UNKNOWN                                                            |
| Up at 6 hrs     | A_65_P07372 | 3.07        | 0.035    |              |           |             |                      | Intronic in U007254                                                |
| Up at 6 hrs     | A_65_P09007 | 3.06        | 0.039    |              |           | XM_148571.2 | Dgcr8;D16H22S1742E   | Mus musculus DiGeorge syndrome critical region gene 8 (Dgcr8), mR  |
| Up at 6 hrs     | A_65_P03654 | 3.03        | 0.002    |              |           |             |                      | Mus musculus transketolase (Tkt), mRNA                             |
| Up at 6 hrs     | A_65_P06280 | 3.02        | 0.022    |              |           | NM_021718.1 | Ly116;Ms4a4b;Ms4a9   | LYMPHOCYTE ANTIGEN 116. [Source:RefSeq;Acc:NM_021718]              |
| Up at 6 hrs     | A_65_P06608 | 2.98        | 0.043    |              |           |             | D18Wsu100e           | UNKNOWN                                                            |
| Up at 6 hrs     | A_65_P02147 | 2.96        | 0.035    |              |           |             |                      | Intronic in U037256                                                |
| Up at 6 hrs     | A_65_P05011 | 2.91        | 0.032    |              |           |             |                      | Intronic in U002155                                                |
| Up at 6 hrs     | A_65_P09675 | 2.90        | 0.018    |              |           |             |                      | Intronic in U030833                                                |
| Up at 6 hrs     | A_65_P09006 | 2.88        | 0.050    |              |           |             | 5730470C09Rik        | Mus musculus RIKEN cDNA 5730470C09 gene (5730470C09Rik), mRNA      |
| Up at 6 hrs     | A_65_P02806 | 2.87        | 0.039    |              |           | NM_013844.1 | Zfp68                | Mus musculus Zinc finger protein 68 (Zfp68), mRNA                  |
| Up at 6 hrs     | A_65_P00963 | 2.86        | 0.013    |              |           |             |                      | UNKNOWN                                                            |
| Up at 6 hrs     | A_65_P01725 | 2.82        | 0.026    |              |           | AF345637.1  |                      | UNKNOWN                                                            |
| Up at 6 hrs     | A_65_P01028 | 2.80        | 0.000    |              |           | NM_153808.1 | SMC5                 | Mus musculus SMC5 protein (SMC5), mRNA                             |
| Up at 6 hrs     | A_65_P06872 | 2.79        | 0.006    |              |           | XM_129016.1 | AA987140;MGC48232    | Mus musculus hypothetical protein MGC48232 (MGC48232), mRNA        |
| Up at 6 hrs     | A_65_P01098 | 2.78        | 0.027    |              |           | XM_043863.3 |                      | UNKNOWN                                                            |
| Up at 6 hrs     | A_65_P00585 | 2.77        | 0.046    |              |           |             |                      | UNKNOWN                                                            |
| Up at 6 hrs     | A_65_P03763 | 2.75        | 0.012    |              |           |             |                      | Intronic in U034845                                                |
| Up at 6 hrs     | A_65_P03760 | 2.74        | 0.002    |              |           |             |                      | Intronic in U030878                                                |
| Up at 6 hrs     | A_65_P05757 | 2.72        | 0.037    |              |           | NM_133808.1 | AA960365             | Mus musculus expressed sequence AA960365 (AA960365), mRNA          |
| Up at 6 hrs     | A_65_P05855 | 2.72        | 0.038    |              |           | AE014175.1  | Irg1                 | PROTEIN ASSOCIATED WITH                                            |
| Up at 6 hrs     | A_65_P05926 | 2.68        | 0.008    |              |           |             |                      | Intronic in U031606                                                |
| Up at 6 hrs     | A_65_P03562 | 2.66        | 0.045    |              |           |             |                      | Intronic in U015419                                                |
| Up at 6 hrs     | A_65_P04062 | 2.65        | 0.034    |              |           |             | C86938               | Intronic in U016074                                                |
| Up at 6 hrs     | A_65_P00617 | 2.64        | 0.038    |              |           |             |                      | OLFACTORY RECEPTOR                                                 |
| Up at 6 hrs     | A_65_P08432 | 2.61        | 0.017    |              |           |             |                      | Intronic in U008372                                                |
| Up at 6 hrs     | A_65_P09621 | 2.60        | 0.025    |              |           |             |                      | NACHT , LRR AND PYD CONTAINING PROTEIN PYRIN CONTAINING APAF1 LIK  |
| Up at 6 hrs     | A_65_P15997 | 2.59        | 0.024    |              |           |             |                      | UNKNOWN                                                            |
| Up at 6 hrs     | A_65_P04227 | 2.58        | 0.049    |              |           |             |                      | Intronic in U030274                                                |
| Up at 6 hrs     | A_65_P08413 | 2.58        | 0.028    |              |           |             |                      | OVARC1001768 PROTEIN homolog [Homo sapiens]                        |
| Up at 6 hrs     | A_65_P06077 | 2.57        | 0.044    |              |           | BC037098.1  | Sf3b1                | Mus musculus splicing factor 3b, subunit 1, 155 kDa (Sf3b1), mRNA  |
| Up at 6 hrs     | A_65_P07964 | 2.56        | 0.022    |              |           |             |                      | Similar to: Mus musculus activated spleen cDNA, RIKEN full-length  |
| Up at 6 hrs     | A_65_P02518 | 2.56        | 0.041    |              |           | NM_013925.1 | Adat1;mADAT1         | Mus musculus adenosine deaminase, tRNA-specific 1 (Adat1), mRNA    |
| Up at 6 hrs     | A_65_P02069 | 2.54        | 0.009    |              |           |             |                      | UNKNOWN                                                            |
| Up at 6 hrs     | A_65_P01550 | 2.53        | 0.047    |              |           | NM_028876.1 | 3110020O18Rik        | UNKNOWN                                                            |
| Up at 6 hrs     | A_65_P09546 | 2.51        | 0.043    |              |           |             |                      | ZINC FINGER PROTEIN                                                |
| Up at 6 hrs     | A_65_P09371 | 2.51        | 0.036    |              |           |             |                      | Intronic in U038950                                                |
| Up at 6 hrs     | A_65_P03286 | 2.51        | 0.006    |              |           |             | 4921528E07Rik;C85251 | Mus musculus RIKEN cDNA 4921528E07 gene (4921528E07Rik), mRNA      |
| Up at 6 hrs     | A_65_P03470 | 2.50        | 0.001    |              |           |             |                      | UNKNOWN                                                            |
| Up at 6 hrs     | A_65_P05566 | 2.50        | 0.020    |              |           | NM_009411.1 | Tpbpa                | Mus musculus trophoblast specific protein alpha (Tpbpa), mRNA      |
| Up at 6 hrs     | A_65_P05642 | 2.49        | 0.016    |              |           |             | C86415               | UNKNOWN                                                            |
| Up at 6 hrs     | A_65_P04847 | 2.48        | 0.009    |              |           | XM_128327.1 | 1700110N18Rik        | Mus musculus RIKEN cDNA 1700110N18 gene (1700110N18Rik), mRNA      |
| Up at 6 hrs     | A_65_P06583 | 2.47        | 0.036    |              |           |             |                      | Similar to: Mus musculus 9 days embryo whole body cDNA, RIKEN ful  |
| Up at 6 hrs     | A_65_P06452 | 2.47        | 0.002    |              |           |             |                      | UNKNOWN                                                            |
| Up at 6 hrs     | A_65_P08240 | 2.46        | 0.025    |              |           |             |                      | UNKNOWN                                                            |

|             |             |      |       |             |               |                                                                   |
|-------------|-------------|------|-------|-------------|---------------|-------------------------------------------------------------------|
| Up at 6 hrs | A_65_P09258 | 2.46 | 0.006 | NM_011485.2 | Star          | Mus musculus steroidogenic acute regulatory protein (Star), mRNA  |
| Up at 6 hrs | A_65_P03115 | 2.44 | 0.021 |             |               | UNKNOWN                                                           |
| Up at 6 hrs | A_65_P00556 | 2.44 | 0.020 | U70139.1    | Ccrn4l        | Mus musculus probable nocturnin protein mRNA, partial cds         |
| Up at 6 hrs | A_65_P10704 | 2.43 | 0.011 |             |               | UNKNOWN                                                           |
| Up at 6 hrs | A_65_P09839 | 2.42 | 0.049 | BC022221.1  | AA939927      | hypothetical Ubiquitin carboxyl-terminal hydrolase family 2 conta |
| Up at 6 hrs | A_65_P06831 | 2.40 | 0.024 | NM_145564.1 | LOC231670     | Mus musculus similar to F-box only protein 21, isoform 1; F-box p |
| Up at 6 hrs | A_65_P06197 | 2.40 | 0.004 |             |               | Intronic in U043388                                               |
| Up at 6 hrs | A_65_P06723 | 2.38 | 0.002 |             |               | UNKNOWN                                                           |
| Up at 6 hrs | A_65_P07484 | 2.38 | 0.043 |             |               | UNKNOWN                                                           |
| Up at 6 hrs | A_65_P01618 | 2.35 | 0.004 |             |               | UNKNOWN                                                           |
| Up at 6 hrs | A_65_P20780 | 2.33 | 0.039 | NM_009386.1 | Tjp1          | Mus musculus tight junction protein 1 (Tjp1), mRNA                |
| Up at 6 hrs | A_65_P04135 | 2.32 | 0.030 |             | C78148        | UNKNOWN                                                           |
| Up at 6 hrs | A_65_P02318 | 2.31 | 0.034 |             |               | Intronic in U002577                                               |
| Up at 6 hrs | A_65_P02619 | 2.31 | 0.047 |             |               | UNKNOWN                                                           |
| Up at 6 hrs | A_65_P05631 | 2.30 | 0.010 |             | Nedd4         | Intronic in U010725                                               |
| Up at 6 hrs | A_65_P01244 | 2.27 | 0.015 |             |               | UNKNOWN                                                           |
| Up at 6 hrs | A_65_P02136 | 2.27 | 0.044 |             |               | UNKNOWN                                                           |
| Up at 6 hrs | A_65_P01285 | 2.25 | 0.023 |             |               | UNKNOWN                                                           |
| Up at 6 hrs | A_65_P08458 | 2.25 | 0.036 |             |               | UNKNOWN                                                           |
| Up at 6 hrs | A_65_P08035 | 2.25 | 0.041 |             |               | UNKNOWN                                                           |
| Up at 6 hrs | A_65_P01686 | 2.25 | 0.003 |             |               | UNKNOWN                                                           |
| Up at 6 hrs | A_65_P10527 | 2.24 | 0.021 |             | Fbxo8         | Mus musculus f-box only protein 8 (Fbxo8), mRNA                   |
| Up at 6 hrs | A_65_P01089 | 2.24 | 0.019 | Y11668.1    | Hk2           | Intronic in U027512                                               |
| Up at 6 hrs | A_65_P04732 | 2.21 | 0.023 |             |               | UNKNOWN                                                           |
| Up at 6 hrs | A_65_P09095 | 2.21 | 0.034 | XM_131568.2 | KIAA0191      | DEVELOPMENTAL CONTROL PROTEIN (FRAGMENT). [Source:SPTREMBL;Acc:Q9 |
| Up at 6 hrs | A_65_P00559 | 2.20 | 0.007 |             |               | Intronic in U008198                                               |
| Up at 6 hrs | A_65_P08687 | 2.20 | 0.030 |             | D1Erd86e      | UNKNOWN                                                           |
| Up at 6 hrs | A_65_P06351 | 2.19 | 0.028 | XM_127009.1 | 150001112Rik  | SEROLOGICALLY DEFINED COLON CANCER ANTIGEN                        |
| Up at 6 hrs | A_65_P01002 | 2.19 | 0.041 |             |               | UNKNOWN                                                           |
| Up at 6 hrs | A_65_P09434 | 2.18 | 0.034 |             |               | Intronic in U005797                                               |
| Up at 6 hrs | A_65_P01872 | 2.17 | 0.019 | AB060589.1  | Dbccr1        | Mus musculus deleted in bladder cancer chromosome region candidat |
| Up at 6 hrs | A_65_P05099 | 2.16 | 0.010 | XM_136142.1 | Mil1          | mitochondria located 1 homolog (human)                            |
| Up at 6 hrs | A_65_P08537 | 2.16 | 0.047 |             |               | Intronic in U006953                                               |
| Up at 6 hrs | A_65_P02605 | 2.16 | 0.023 |             |               | UNKNOWN                                                           |
| Up at 6 hrs | A_65_P03257 | 2.14 | 0.005 |             |               | Intronic in U035396                                               |
| Up at 6 hrs | A_65_P07652 | 2.13 | 0.021 | NM_146256.1 | BC034099      | Mus musculus cDNA sequence BC034099 (BC034099), mRNA              |
| Up at 6 hrs | A_65_P03889 | 2.13 | 0.045 |             |               | weakly similar to DRCTNNB1A [Mus musculus]                        |
| Up at 6 hrs | A_65_P00794 | 2.12 | 0.021 |             |               | UNKNOWN                                                           |
| Up at 6 hrs | A_65_P06144 | 2.12 | 0.028 |             |               | REPEAT-SEQUENCE                                                   |
| Up at 6 hrs | A_65_P02347 | 2.12 | 0.030 | XM_143803.2 | C4BP          | similar to CDNA FLJ32142 FIS, CLONE PLACE5000068, WEAKLY SIMILAR  |
| Up at 6 hrs | A_65_P04123 | 2.12 | 0.042 | XM_127726.2 | 5830451P18Rik | similar to KIAA1564 PROTEIN (FRAGMENT) [Homo sapiens]             |
| Up at 6 hrs | A_65_P09127 | 2.12 | 0.024 |             |               | UNKNOWN                                                           |
| Up at 6 hrs | A_65_P05643 | 2.10 | 0.019 |             | Pafah1b2      | Mus musculus platelet-activating factor acetylhydrolase, isoform  |
| Up at 6 hrs | A_65_P01882 | 2.10 | 0.015 |             |               | UNKNOWN                                                           |
| Up at 6 hrs | A_65_P08024 | 2.10 | 0.047 | NM_009465.1 | Axl           | Mus musculus AXL receptor tyrosine kinase (Axl), mRNA             |
| Up at 6 hrs | A_65_P07876 | 2.09 | 0.016 |             |               | Intronic in U032656                                               |
| Up at 6 hrs | A_65_P02734 | 2.09 | 0.004 |             |               | Intronic in U032647                                               |
| Up at 6 hrs | A_65_P08460 | 2.08 | 0.002 |             |               | Intronic in U041319                                               |
| Up at 6 hrs | A_65_P13608 | 2.07 | 0.023 |             |               | UNKNOWN                                                           |
| Up at 6 hrs | A_65_P08158 | 2.07 | 0.042 |             |               | UNKNOWN                                                           |
| Up at 6 hrs | A_65_P06350 | 2.07 | 0.007 |             | C77681        | UNKNOWN                                                           |
| Up at 6 hrs | A_65_P07559 | 2.06 | 0.046 |             | Gtl6          | CBP37 (FRAGMENT). [Source:SPTREMBL;Acc:O88380]                    |
| Up at 6 hrs | A_65_P02827 | 2.06 | 0.035 |             |               | UNKNOWN                                                           |
| Up at 6 hrs | A_65_P03966 | 2.06 | 0.049 | BC016532.1  |               | Intronic in U008466                                               |
| Up at 6 hrs | A_65_P01969 | 2.05 | 0.041 | XM_176781.1 | Scamp1        | SECRETORY CARRIER ASSOCIATED MEMBRANE PROTEIN                     |
| Up at 6 hrs | A_65_P05491 | 2.05 | 0.017 | XM_112832.1 |               | Mus musculus LOC195081 (LOC195081), mRNA                          |
| Up at 6 hrs | A_65_P04880 | 2.05 | 0.027 |             | AU018912      | Intronic in U029599                                               |
| Up at 6 hrs | A_65_P10336 | 2.04 | 0.031 | NM_028958.2 | Taf7l         | Mus musculus TAF7-like RNA polymerase II, TATA box binding protei |

|             |             |      |       |             |                    |                                                                   |
|-------------|-------------|------|-------|-------------|--------------------|-------------------------------------------------------------------|
| Up at 6 hrs | A_65_P10714 | 2.03 | 0.023 |             |                    | Intronic in U005254                                               |
| Up at 6 hrs | A_65_P07851 | 2.02 | 0.043 | U25802.1    | Lhb                | Mus musculus luteinizing hormone beta (Lhb), mRNA                 |
| Up at 6 hrs | A_65_P07481 | 2.02 | 0.004 |             |                    | UNKNOWN                                                           |
| Up at 6 hrs | A_65_P07506 | 2.02 | 0.011 |             |                    | Intronic in U002764                                               |
| Up at 6 hrs | A_65_P06343 | 2.00 | 0.015 | NM_026658.1 | 2310039H01Rik;Mto1 | Mus musculus mitochondrial translation optimization 1 homolog (S. |
| Up at 6 hrs | A_65_P04057 | 2.00 | 0.031 |             |                    | UNKNOWN                                                           |
| Up at 6 hrs | A_65_P06834 | 2.00 | 0.016 |             |                    | Intronic in U015424                                               |
| Up at 6 hrs | A_65_P07378 | 2.00 | 0.011 |             |                    | UNKNOWN                                                           |
| Up at 6 hrs | A_65_P07676 | 2.00 | 0.040 |             |                    | Intronic in U032073                                               |
| Up at 6 hrs | A_65_P01843 | 1.99 | 0.003 |             |                    | Intronic in U004894                                               |
| Up at 6 hrs | A_65_P01487 | 1.98 | 0.003 | BC035797.1  |                    | ERROR:Non-Mouse Gene:Homo sapiens, CCAAT/enhancer binding protein |
| Up at 6 hrs | A_65_P01049 | 1.98 | 0.020 |             |                    | UNKNOWN                                                           |
| Up at 6 hrs | A_65_P11601 | 1.97 | 0.040 |             |                    | UNKNOWN                                                           |
| Up at 6 hrs | A_65_P03874 | 1.97 | 0.008 | XM_012028.8 |                    | UNKNOWN                                                           |
| Up at 6 hrs | A_65_P05403 | 1.97 | 0.038 |             | D7ErtD661e         | Intronic in U028185                                               |
| Up at 6 hrs | A_65_P01982 | 1.96 | 0.040 | XM_148376.2 | 1600021C16Rik      | hypothetical Zinc finger, C2H2 type containing protein            |
| Up at 6 hrs | A_65_P06729 | 1.96 | 0.035 |             | Ankrd6             | Mus musculus ankyrin repeat domain 6 (Ankrd6), mRNA               |
| Up at 6 hrs | A_65_P02998 | 1.96 | 0.034 |             |                    | Intronic in U038023                                               |
| Up at 6 hrs | A_65_P03872 | 1.96 | 0.046 |             | Znfn1a4            | UNKNOWN                                                           |
| Up at 6 hrs | A_65_P03411 | 1.95 | 0.015 |             |                    | NUCLEAR PORE COMPLEX PROTEIN NUP214 NUCLEOPORIN NUP214.214 KDA NU |
| Up at 6 hrs | A_65_P01553 | 1.94 | 0.036 |             |                    | UNKNOWN                                                           |
| Up at 6 hrs | A_65_P14720 | 1.93 | 0.026 | AB042432.1  | mt-Nd3             | Mus musculus domesticus mitochondrial DNA, complete genome        |
| Up at 6 hrs | A_65_P03845 | 1.92 | 0.037 |             |                    | UNKNOWN                                                           |
| Up at 6 hrs | A_65_P01140 | 1.92 | 0.003 |             |                    | Intronic in U014796                                               |
| Up at 6 hrs | A_65_P05558 | 1.91 | 0.027 |             | C79238             | Intronic in U027142                                               |
| Up at 6 hrs | A_65_P08587 | 1.91 | 0.014 | NM_019816.1 | Trb                | Mus musculus traube (Trb), mRNA                                   |
| Up at 6 hrs | A_65_P01077 | 1.91 | 0.047 | XM_129435.1 |                    | Mus musculus similar to hypothetical protein [Encephalitozoon cun |
| Up at 6 hrs | A_65_P02604 | 1.91 | 0.006 | AB040928.1  | Al316885           | UNKNOWN                                                           |
| Up at 6 hrs | A_65_P04350 | 1.90 | 0.048 |             |                    | UNKNOWN                                                           |
| Up at 6 hrs | A_65_P01659 | 1.90 | 0.012 |             | Cul3               | Mus musculus cullin 3 (Cul3), mRNA                                |
| Up at 6 hrs | A_65_P02223 | 1.89 | 0.026 | NM_145989.1 | MGC37385           | Mus musculus hypothetical protein MGC37385 (MGC37385), mRNA       |
| Up at 6 hrs | A_65_P03221 | 1.89 | 0.040 |             |                    | weakly similar to KIAA1751 PROTEIN (FRAGMENT) [Homo sapiens]      |
| Up at 6 hrs | A_65_P15078 | 1.89 | 0.040 |             |                    | Intronic in U014245                                               |
| Up at 6 hrs | A_65_P06307 | 1.88 | 0.023 |             | D18ErtD201e        | UNKNOWN                                                           |
| Up at 6 hrs | A_65_P00545 | 1.88 | 0.002 |             | AU015555           | Intronic in U033164                                               |
| Up at 6 hrs | A_65_P11356 | 1.87 | 0.003 |             | 1700022F17Rik      | hypothetical Glutamine-rich region containing protein             |
| Up at 6 hrs | A_65_P03838 | 1.87 | 0.043 | NM_016675.1 | Cldn2              | Mus musculus claudin 2 (Cldn2), mRNA                              |
| Up at 6 hrs | A_65_P07441 | 1.87 | 0.049 | XM_142517.1 |                    | UNKNOWN                                                           |
| Up at 6 hrs | A_65_P04460 | 1.86 | 0.047 |             |                    | UNKNOWN                                                           |
| Up at 6 hrs | A_65_P04069 | 1.86 | 0.010 | AF302047.1  | 9030425E11Rik      | Mus musculus RIKEN cDNA 9030425E11 gene (9030425E11Rik), mRNA     |
| Up at 6 hrs | A_65_P03880 | 1.86 | 0.048 |             |                    | UNKNOWN                                                           |
| Up at 6 hrs | A_65_P09885 | 1.85 | 0.028 |             |                    | UNKNOWN                                                           |
| Up at 6 hrs | A_65_P00738 | 1.85 | 0.002 |             |                    | UNKNOWN                                                           |
| Up at 6 hrs | A_65_P01181 | 1.84 | 0.007 |             | Tcf4               | Mus musculus transcription factor 4 (Tcf4), mRNA                  |
| Up at 6 hrs | A_65_P06356 | 1.84 | 0.033 | NM_010687.1 | Large              | Mus musculus like-glycosyltransferase (Large), mRNA               |
| Up at 6 hrs | A_65_P04344 | 1.84 | 0.015 | NM_026924.2 | Ovol2              | Mus musculus OVO homolog-like 2 (Drosophila) (Ovol2), transcript  |
| Up at 6 hrs | A_65_P13762 | 1.83 | 0.036 |             |                    | UNKNOWN                                                           |
| Up at 6 hrs | A_65_P03377 | 1.83 | 0.044 |             |                    | UNKNOWN                                                           |
| Up at 6 hrs | A_65_P00558 | 1.83 | 0.040 |             | BC003281           | UNKNOWN                                                           |
| Up at 6 hrs | A_65_P15489 | 1.83 | 0.048 |             |                    | Intronic in U022788                                               |
| Up at 6 hrs | A_65_P00946 | 1.83 | 0.011 | NM_016958.1 | Krt1-24            | Mus musculus keratin complex 1, acidic, gene 19 (Krt1-19), mRNA   |
| Up at 6 hrs | A_65_P10119 | 1.82 | 0.031 |             | C76179             | Mus musculus transducin (beta)-like 2 (Tbl2), mRNA                |
| Up at 6 hrs | A_65_P00891 | 1.82 | 0.016 |             | Sytl2              | Mus musculus synaptotagmin-like 2 (Sytl2), mRNA                   |
| Up at 6 hrs | A_65_P06961 | 1.82 | 0.049 |             |                    | Intronic in U028060                                               |
| Up at 6 hrs | A_65_P06735 | 1.82 | 0.025 | XM_146986.1 | C430017I08         | ZINC FINGER PROTEIN                                               |
| Up at 6 hrs | A_65_P01883 | 1.82 | 0.014 |             |                    | UNKNOWN                                                           |
| Up at 6 hrs | A_65_P06150 | 1.82 | 0.042 |             | 5730405E07Rik      | MITOCHONDRIAL INTERMEDIATE PEPTIDASE, MITOCHONDRIAL PRECURSOR EC  |
| Up at 6 hrs | A_65_P01362 | 1.82 | 0.023 |             | D5ErtD422e         | UNKNOWN                                                           |

|             |             |      |       |             |                     |  |                                                                   |
|-------------|-------------|------|-------|-------------|---------------------|--|-------------------------------------------------------------------|
| Up at 6 hrs | A_65_P05571 | 1.82 | 0.047 |             |                     |  | Similar to: Mus musculus adult male spinal cord cDNA, RIKEN full- |
| Up at 6 hrs | A_65_P03834 | 1.81 | 0.011 | XM_129465.2 | A1A;GPCR;Adora1     |  | adenosine A1 receptor                                             |
| Up at 6 hrs | A_65_P02185 | 1.81 | 0.018 | XM_131375.2 | Creb3               |  | Mus musculus cAMP responsive element binding protein 3 (Creb3), m |
| Up at 6 hrs | A_65_P09081 | 1.81 | 0.010 | NM_010256.1 | Gart                |  | Mus musculus phosphoribosylglycinamide formyltransferase (Gart),  |
| Up at 6 hrs | A_65_P06512 | 1.80 | 0.032 |             |                     |  | tumor suppressor protein dcc precursor {Mus musculus}             |
| Up at 6 hrs | A_65_P01274 | 1.80 | 0.047 |             | D17Erttd648e        |  | UNKNOWN                                                           |
| Up at 6 hrs | A_65_P04868 | 1.80 | 0.017 | NM_021527.1 | Mkks                |  | Mus musculus McKusick-Kaufman syndrome protein (Mkks), mRNA       |
| Up at 6 hrs | A_65_P00804 | 1.79 | 0.019 |             |                     |  | Intronic in U024061                                               |
| Up at 6 hrs | A_65_P08003 | 1.79 | 0.037 | XM_138795.1 |                     |  | RAS GTPASE ACTIVATING LIKE PROTEIN                                |
| Up at 6 hrs | A_65_P04324 | 1.79 | 0.027 |             | AI451886            |  | UNKNOWN                                                           |
| Up at 6 hrs | A_65_P01296 | 1.79 | 0.003 |             |                     |  | UNKNOWN                                                           |
| Up at 6 hrs | A_65_P08877 | 1.79 | 0.018 |             |                     |  | Intronic in U038677                                               |
| Up at 6 hrs | A_65_P19629 | 1.79 | 0.006 |             |                     |  | UNKNOWN                                                           |
| Up at 6 hrs | A_65_P18459 | 1.78 | 0.033 | BC005757.1  |                     |  | SIMILAR TO GENE. [Source:SPTREMBL;Acc:Q922F3]                     |
| Up at 6 hrs | A_65_P06405 | 1.78 | 0.043 |             |                     |  | UNKNOWN                                                           |
| Up at 6 hrs | A_65_P05502 | 1.78 | 0.047 | NM_013565.1 | Itga3               |  | Mus musculus integrin alpha 3 (Itga3), mRNA                       |
| Up at 6 hrs | A_65_P09324 | 1.77 | 0.003 | NM_026025.1 | 2700088M22Rik       |  | Mus musculus RIKEN cDNA 2700088M22 gene (2700088M22Rik), mRNA     |
| Up at 6 hrs | A_65_P13034 | 1.77 | 0.040 |             |                     |  | UNKNOWN                                                           |
| Up at 6 hrs | A_65_P07107 | 1.77 | 0.024 | XM_133488.1 | LOC233235           |  | Mus musculus retinoic acid inducible in neuroblastoma (LOC233235) |
| Up at 6 hrs | A_65_P03381 | 1.76 | 0.024 | AL137533.1  | DKFZp434G1919       |  | INNER NUCLEAR MEMBRANE PROTEIN                                    |
| Up at 6 hrs | A_65_P02436 | 1.76 | 0.034 | NM_012012.1 | Colec12;Exo1        |  | Mus musculus exonuclease 1 (Exo1), mRNA                           |
| Up at 6 hrs | A_65_P04260 | 1.76 | 0.003 | XM_132231.1 | MGC29037            |  | Mus musculus hypothetical protein MGC29037 (MGC29037), mRNA       |
| Up at 6 hrs | A_65_P01237 | 1.76 | 0.048 |             |                     |  | UNKNOWN                                                           |
| Up at 6 hrs | A_65_P01672 | 1.75 | 0.032 |             |                     |  | UNKNOWN                                                           |
| Up at 6 hrs | A_65_P08802 | 1.75 | 0.028 | XM_131300.1 |                     |  | Mus musculus similar to agCP13716 [Anopheles gambiae str. PEST] ( |
| Up at 6 hrs | A_65_P06428 | 1.74 | 0.035 | NM_011970.1 | Psmb2               |  | Mus musculus proteasome (prosome, macropain) subunit, beta type 2 |
| Up at 6 hrs | A_65_P12910 | 1.74 | 0.033 |             |                     |  | Intronic in U043842                                               |
| Up at 6 hrs | A_65_P05351 | 1.74 | 0.049 | NM_153102.1 |                     |  | UNKNOWN                                                           |
| Up at 6 hrs | A_65_P03016 | 1.74 | 0.022 |             |                     |  | Similar to: Rattus norvegicus LOC314362 (LOC314362), mRNA         |
| Up at 6 hrs | A_65_P02983 | 1.73 | 0.020 | NM_020932.1 | Magee1              |  | Mus musculus melanoma antigen, family E, 1 (Magee1), mRNA         |
| Up at 6 hrs | A_65_P12004 | 1.73 | 0.019 | BC028971.1  | 3110050O07Rik;Meg3  |  | Mus musculus maternally expressed gene 3 (Meg3), mRNA             |
| Up at 6 hrs | A_65_P06444 | 1.73 | 0.013 | XM_125808.2 |                     |  | SIMILAR TO CYTOSKELETON ASSOCIATED PROTEIN 4                      |
| Up at 6 hrs | A_65_P05677 | 1.73 | 0.040 | XM_129447.2 | 2300008B03Rik       |  | hypothetical Microbodies C-terminal targeting signal containing p |
| Up at 6 hrs | A_65_P15040 | 1.72 | 0.033 |             |                     |  | REPEAT-SEQUENCE                                                   |
| Up at 6 hrs | A_65_P08318 | 1.72 | 0.035 | XM_134081.3 | Ikbkb               |  | INHIBITOR OF NUCLEAR FACTOR KAPPA B KINASE BETA SUBUNIT (EC 2.7.1 |
| Up at 6 hrs | A_65_P08984 | 1.72 | 0.036 |             |                     |  | Intronic in U012442                                               |
| Up at 6 hrs | A_65_P05572 | 1.72 | 0.029 | NM_146139.1 | Vav3                |  | Mus musculus vav 3 oncogene (Vav3), mRNA                          |
| Up at 6 hrs | A_65_P06730 | 1.72 | 0.034 | NM_153078.1 | LOC216565           |  | Mus musculus KIAA0903-like (LOC216565), mRNA                      |
| Up at 6 hrs | A_65_P00680 | 1.71 | 0.024 | BC022642.1  | Vegfa               |  | Mus musculus vascular endothelial growth factor A (Vegfa), mRNA   |
| Up at 6 hrs | A_65_P03802 | 1.71 | 0.011 |             |                     |  | UNKNOWN                                                           |
| Up at 6 hrs | A_65_P06845 | 1.71 | 0.026 |             | 4932439K10Rik       |  | Mus musculus RIKEN cDNA 4932439K10 gene (4932439K10Rik), mRNA     |
| Up at 6 hrs | A_65_P16632 | 1.71 | 0.039 |             | Tcf1                |  | Mus musculus transcription factor-like 1 (Tcf1), mRNA             |
| Up at 6 hrs | A_65_P06728 | 1.71 | 0.011 | NM_018853.1 | Rplp1               |  | Cross Reactive                                                    |
| Up at 6 hrs | A_65_P02255 | 1.70 | 0.015 |             |                     |  | Intronic in U014409                                               |
| Up at 6 hrs | A_65_P05178 | 1.70 | 0.026 |             | AI462125            |  | ZINC FINGER                                                       |
| Up at 6 hrs | A_65_P07862 | 1.70 | 0.025 | NM_013593.2 | Mb                  |  | Mus musculus myoglobin (Mb), mRNA                                 |
| Up at 6 hrs | A_65_P09872 | 1.69 | 0.019 |             |                     |  | UNKNOWN                                                           |
| Up at 6 hrs | A_65_P11477 | 1.69 | 0.035 |             | 2610312E17Rik;Ovgp1 |  | Mus musculus RIKEN cDNA 2610312E17 gene (2610312E17Rik), mRNA     |
| Up at 6 hrs | A_65_P19034 | 1.69 | 0.006 |             | Axcam               |  | Mus musculus axonal-associated cell adhesion molecule (Axcam), mR |
| Up at 6 hrs | A_65_P10249 | 1.69 | 0.023 |             | Eya1                |  | Mus musculus eyes absent 1 homolog (Drosophila) (Eya1), mRNA      |
| Up at 6 hrs | A_65_P03173 | 1.69 | 0.029 | BC031529.1  | FacI3               |  | LONG CHAIN FATTY ACID COA LIGASE EC 6.2.1.3 LONG CHAIN ACYL COA S |
| Up at 6 hrs | A_65_P08230 | 1.69 | 0.047 |             |                     |  | Intronic in U000236                                               |
| Up at 6 hrs | A_65_P12263 | 1.69 | 0.042 |             | AW492152            |  | UNKNOWN                                                           |
| Up at 6 hrs | A_65_P00852 | 1.68 | 0.029 |             |                     |  | UNKNOWN                                                           |
| Up at 6 hrs | A_65_P02755 | 1.68 | 0.001 |             | D17Wsu134e          |  | Intronic in U037398                                               |
| Up at 6 hrs | A_65_P09569 | 1.68 | 0.049 | AJ249895.1  | mas                 |  | Intronic in U017499                                               |
| Up at 6 hrs | A_65_P07194 | 1.68 | 0.011 | NM_025904.1 | 1600012F09Rik       |  | Mus musculus RIKEN cDNA 1600012F09 gene (1600012F09Rik), mRNA     |
| Up at 6 hrs | A_65_P11380 | 1.68 | 0.021 |             |                     |  | UNKNOWN                                                           |

|             |             |      |       |             |               |                                                                           |
|-------------|-------------|------|-------|-------------|---------------|---------------------------------------------------------------------------|
| Up at 6 hrs | A_65_P03777 | 1.67 | 0.048 |             | Ldh1          | UNKNOWN                                                                   |
| Up at 6 hrs | A_65_P06682 | 1.67 | 0.013 | NM_053072.1 | Etohd4        | Mus musculus ethanol decreased 4 (Etohd4), mRNA                           |
| Up at 6 hrs | A_65_P09772 | 1.67 | 0.017 |             |               | Intronic in U011487                                                       |
| Up at 6 hrs | A_65_P11207 | 1.67 | 0.049 | NM_130869.1 | Og2x          | Mus musculus OG2 homeobox gene (Og2x), mRNA                               |
| Up at 6 hrs | A_65_P00849 | 1.67 | 0.024 |             |               | Intronic in U004638                                                       |
| Up at 6 hrs | A_65_P00550 | 1.67 | 0.033 | AC025434.6  | AI504364      | Intronic in U032704                                                       |
| Up at 6 hrs | A_65_P00562 | 1.67 | 0.050 | NM_025335.1 | 0610041E09Rik | Mus musculus RIKEN cDNA 0610041E09 gene (0610041E09Rik), mRNA             |
| Up at 6 hrs | A_65_P20086 | 1.66 | 0.033 | NM_009825.1 | Serpinh1      | Mus musculus serine (or cysteine) proteinase inhibitor, clade H, UNKNOWN  |
| Up at 6 hrs | A_65_P08708 | 1.66 | 0.047 |             |               |                                                                           |
| Up at 6 hrs | A_65_P01368 | 1.65 | 0.046 | XM_133599.1 | 4931406N15Rik | PMMLP homolog [Homo sapiens]                                              |
| Up at 6 hrs | A_65_P04998 | 1.65 | 0.037 | NM_009509.1 | Vil           | Mus musculus villin (Vil), mRNA                                           |
| Up at 6 hrs | A_65_P13613 | 1.65 | 0.042 |             |               | Intronic in U031830                                                       |
| Up at 6 hrs | A_65_P07859 | 1.64 | 0.020 | NM_008695.1 | Nid2          | Mus musculus nidogen 2 (Nid2), mRNA                                       |
| Up at 6 hrs | A_65_P04439 | 1.64 | 0.034 | NM_172266.1 | LOC226856     | SIMILAR TO KIAA0205 GENE PRODUCT. [Source:SPTREMBL;Acc:Q91YX5]            |
| Up at 6 hrs | A_65_P10300 | 1.64 | 0.039 | NM_011407.1 | Sifn1         | Mus musculus schlafen 1 (Sifn1), mRNA                                     |
| Up at 6 hrs | A_65_P03586 | 1.63 | 0.041 |             |               | Intronic in U010633                                                       |
| Up at 6 hrs | A_65_P08178 | 1.63 | 0.016 | NM_138745.1 | Mthfd1        | Mus musculus methylenetetrahydrofolate dehydrogenase (NADP+ depen UNKNOWN |
| Up at 6 hrs | A_65_P03495 | 1.63 | 0.032 |             |               |                                                                           |
| Up at 6 hrs | A_65_P00932 | 1.63 | 0.014 | NM_008224.1 | Hcfc1         | UNKNOWN                                                                   |
| Up at 6 hrs | A_65_P08109 | 1.63 | 0.012 |             |               | UNKNOWN                                                                   |
| Up at 6 hrs | A_65_P07091 | 1.63 | 0.025 | NM_016690.1 | Hnrpd1        | Mus musculus heterogeneous nuclear ribonucleoprotein D-like (Hnrp         |
| Up at 6 hrs | A_65_P06318 | 1.62 | 0.030 |             | C76940        | Intronic in U034078                                                       |
| Up at 6 hrs | A_65_P04341 | 1.62 | 0.034 |             |               | UNKNOWN                                                                   |
| Up at 6 hrs | A_65_P08309 | 1.62 | 0.015 | NM_152812.1 | 2600013N14Rik | Mus musculus RIKEN cDNA 2600013N14 gene (2600013N14Rik), mRNA             |
| Up at 6 hrs | A_65_P08390 | 1.62 | 0.012 |             |               | Intronic in U003295                                                       |
| Up at 6 hrs | A_65_P05772 | 1.62 | 0.013 |             |               | UNKNOWN                                                                   |
| Up at 6 hrs | A_65_P19346 | 1.62 | 0.022 |             |               | UNKNOWN                                                                   |
| Up at 6 hrs | A_65_P05823 | 1.62 | 0.023 | BC023413.1  | Pard3         | Mus musculus par-3 (partitioning defective 3) homolog (C. elegans         |
| Up at 6 hrs | A_65_P01720 | 1.62 | 0.026 |             |               | Intronic in U002259                                                       |
| Up at 6 hrs | A_65_P09148 | 1.61 | 0.045 |             |               | Intronic in U039382                                                       |
| Up at 6 hrs | A_65_P19630 | 1.61 | 0.023 | NM_013808.1 | Csrp3         | Mus musculus cysteine-rich protein 3 (Csrp3), mRNA                        |
| Up at 6 hrs | A_65_P05665 | 1.61 | 0.009 | NM_025318.1 | 0610009E20Rik | Mus musculus RIKEN cDNA 0610009E20 gene (0610009E20Rik), mRNA             |
| Up at 6 hrs | A_65_P10600 | 1.61 | 0.023 |             |               | UNKNOWN                                                                   |
| Up at 6 hrs | A_65_P05388 | 1.60 | 0.045 |             |               | REPEAT-SEQUENCE                                                           |
| Up at 6 hrs | A_65_P08216 | 1.60 | 0.045 | NM_029092.1 | D16Ert454e    | Mus musculus DNA segment, Chr 16, ERATO Doi 454, expressed (D16Er         |
| Up at 6 hrs | A_65_P05158 | 1.60 | 0.004 | BC026463.1  |               | Similar to: Mus musculus, Similar to RAS-like, estrogen-regulated         |
| Up at 6 hrs | A_65_P03304 | 1.59 | 0.032 |             |               | UNKNOWN                                                                   |
| Up at 6 hrs | A_65_P01415 | 1.59 | 0.007 | Z95116.1    | AV002070      | REPEAT-SEQUENCE                                                           |
| Up at 6 hrs | A_65_P12856 | 1.59 | 0.011 |             |               | Intronic in U000919                                                       |
| Up at 6 hrs | A_65_P08900 | 1.59 | 0.040 | XM_096858.5 | Asb7          | Mus musculus ankyrin repeat and SOCS box-containing protein 7 (As         |
| Up at 6 hrs | A_65_P03108 | 1.59 | 0.042 |             |               | UNKNOWN                                                                   |
| Up at 6 hrs | A_65_P01580 | 1.59 | 0.050 | BC005555.1  | Prlr          | Mus musculus prolactin receptor (Prlr), mRNA                              |
| Up at 6 hrs | A_65_P04447 | 1.58 | 0.005 | XM_134151.2 | Aga           | N(4)-(BETA-N-ACETYLGUCOSAMINYL)-L-ASPARAGINASE PRECURSOR (EC 3.5          |
| Up at 6 hrs | A_65_P04630 | 1.58 | 0.043 | XM_163103.1 |               | Mus musculus LOC243738 (LOC243738), mRNA                                  |
| Up at 6 hrs | A_65_P04063 | 1.58 | 0.008 | XM_147678.2 |               | FYVE 1                                                                    |
| Up at 6 hrs | A_65_P07322 | 1.58 | 0.007 | NM_012773.1 |               | UNKNOWN                                                                   |
| Up at 6 hrs | A_65_P07585 | 1.58 | 0.012 | BC027788.1  | AA960365      | Mus musculus expressed sequence AA960365 (AA960365), mRNA                 |
| Up at 6 hrs | A_65_P14558 | 1.58 | 0.002 |             |               | Intronic in U025201                                                       |
| Up at 6 hrs | A_65_P04457 | 1.58 | 0.012 | NM_010417.1 | Heph          | Mus musculus hephaestin (Heph), mRNA                                      |
| Up at 6 hrs | A_65_P16168 | 1.58 | 0.000 |             |               | Intronic in U012029                                                       |
| Up at 6 hrs | A_65_P07932 | 1.58 | 0.049 |             | D15Wsu126e    | Intronic in U036169                                                       |
| Up at 6 hrs | A_65_P01238 | 1.57 | 0.008 |             |               | UNKNOWN                                                                   |
| Up at 6 hrs | A_65_P03258 | 1.57 | 0.029 | XM_127599.1 | Camk2g        | CALCIUM/CALMODULIN-DEPENDENT PROTEIN KINASE II GAMMA. [Source:SPT         |
| Up at 6 hrs | A_65_P03298 | 1.57 | 0.034 |             |               | similar to 5730493B19RIK PROTEIN [Mus musculus]                           |
| Up at 6 hrs | A_65_P07942 | 1.57 | 0.035 |             |               | UNKNOWN                                                                   |
| Up at 6 hrs | A_65_P00777 | 1.57 | 0.042 |             | Rbak;Zfp316   | Mus musculus zinc finger protein 316 (Zfp316), mRNA                       |
| Up at 6 hrs | A_65_P07477 | 1.57 | 0.035 | NM_024257.1 | 2810435D12Rik | Mus musculus RIKEN cDNA 2810435D12 gene (2810435D12Rik), mRNA             |
| Up at 6 hrs | A_65_P07155 | 1.57 | 0.043 | XM_134972.1 |               | hypothetical Leucine-rich repeat, typical subtype containing prot         |

|             |             |      |       |             |                     |                                                                   |
|-------------|-------------|------|-------|-------------|---------------------|-------------------------------------------------------------------|
| Up at 6 hrs | A_65_P03671 | 1.57 | 0.029 |             | A930014M17Rik       | hypothetical ADP-ribosylation factors family/SAR1 GTP-binding pro |
| Up at 6 hrs | A_65_P01716 | 1.57 | 0.023 | NM_007953.1 | Esrra               | Mus musculus estrogen related receptor, alpha (Esrra), mRNA       |
| Up at 6 hrs | A_65_P03136 | 1.57 | 0.010 | AK004400.1  | 1110067M05Rik       | Similar to: Rattus norvegicus similar to thyroid hormone receptor |
| Up at 6 hrs | A_65_P06538 | 1.57 | 0.033 |             | Mte1-pending        | UNKNOWN                                                           |
| Up at 6 hrs | A_65_P09025 | 1.56 | 0.037 | NM_026190.1 | 2310047G20Rik       | Mus musculus RIKEN cDNA 2310047G20 gene (2310047G20Rik), mRNA     |
| Up at 6 hrs | A_65_P00557 | 1.56 | 0.049 | NM_009610.1 | Actg2               | Mus musculus actin, gamma 2, smooth muscle, enteric (Actg2), mRNA |
| Up at 6 hrs | A_65_P10819 | 1.56 | 0.037 | NM_011049.1 | Pctk1               | Mus musculus PCTAIRE-motif protein kinase 1 (Pctk1), mRNA         |
| Up at 6 hrs | A_65_P04936 | 1.56 | 0.015 |             |                     | UNKNOWN                                                           |
| Up at 6 hrs | A_65_P04081 | 1.56 | 0.030 | XM_128551.1 | 1810034B16Rik       | RIKEN cDNA 1810034B16 gene                                        |
| Up at 6 hrs | A_65_P06081 | 1.55 | 0.003 | BC038086.1  | D430039N05Rik       | NPD019 homolog [Homo sapiens]                                     |
| Up at 6 hrs | A_65_P01369 | 1.55 | 0.015 | NM_134029.1 | 2010013E09Rik;Nt5m  | Mus musculus 5,3-nucleotidase, mitochondrial (Nt5m), mRNA         |
| Up at 6 hrs | A_65_P06366 | 1.55 | 0.015 | AK016219.1  | 4930564D15Rik       | Mus musculus adult male testis cDNA, RIKEN full-length enriched I |
| Up at 6 hrs | A_65_P12192 | 1.55 | 0.008 |             |                     | Mus musculus cadherin 5 (Cdh5), mRNA                              |
| Up at 6 hrs | A_65_P02727 | 1.55 | 0.023 |             | Ulk1                | UNKNOWN                                                           |
| Up at 6 hrs | A_65_P10213 | 1.55 | 0.007 |             |                     | Intronic in U033626                                               |
| Up at 6 hrs | A_65_P11548 | 1.55 | 0.002 | NM_008590.1 | Mest                | Mus musculus mesoderm specific transcript (Mest), mRNA            |
| Up at 6 hrs | A_65_P06335 | 1.54 | 0.023 | NM_026119.1 | 2410046H15Rik       | Mus musculus RIKEN cDNA 2410046H15 gene (2410046H15Rik), mRNA     |
| Up at 6 hrs | A_65_P02658 | 1.54 | 0.013 | NM_016972.1 | Slc7a8              | Mus musculus solute carrier family 7 (cationic amino acid transpo |
| Up at 6 hrs | A_65_P10278 | 1.54 | 0.010 | BC031380.1  | Tcf4                | Mus musculus transcription factor-like 4 (Tcf4), mRNA             |
| Up at 6 hrs | A_65_P05625 | 1.54 | 0.018 | NM_172832.1 | C630049M13          | hypothetical FAD/NAD(P)-binding domain structure containing prote |
| Up at 6 hrs | A_65_P05868 | 1.54 | 0.023 |             |                     | Intronic in U008198                                               |
| Up at 6 hrs | A_65_P08332 | 1.53 | 0.046 |             |                     | UNKNOWN                                                           |
| Up at 6 hrs | A_65_P10196 | 1.53 | 0.003 |             |                     | UNKNOWN                                                           |
| Up at 6 hrs | A_65_P09883 | 1.53 | 0.026 | XM_163232.1 |                     | UNKNOWN                                                           |
| Up at 6 hrs | A_65_P05969 | 1.53 | 0.038 |             | Mttp                | Mus musculus microsomal triglyceride transfer protein (Mttp), mRN |
| Up at 6 hrs | A_65_P10370 | 1.52 | 0.000 |             |                     | Intronic in U038668                                               |
| Up at 6 hrs | A_65_P10744 | 1.52 | 0.029 |             |                     | DUAL SPECIFICITY PROTEIN PHOSPHATASE 13 EC 3.1.3.48 EC 3.1.3.- 16 |
| Up at 6 hrs | A_65_P07386 | 1.52 | 0.049 |             | AU015682            | UNKNOWN                                                           |
| Up at 6 hrs | A_65_P03890 | 1.52 | 0.011 | NM_145371.1 | Eif2b1              | UNKNOWN                                                           |
| Up at 6 hrs | A_65_P05645 | 1.52 | 0.039 | BC012849.1  | 2810036L13Rik       | Mus musculus RIKEN cDNA 2810036L13 gene (2810036L13Rik), mRNA     |
| Up at 6 hrs | A_65_P10309 | 1.52 | 0.049 |             | Mrps5               | Mus musculus mitochondrial ribosomal protein S5 (Mrps5), mRNA     |
| Up at 6 hrs | A_65_P03692 | 1.52 | 0.010 | NM_026883.1 | 1500011H22Rik       | Mus musculus RIKEN cDNA 1500011H22 gene (1500011H22Rik), mRNA     |
| Up at 6 hrs | A_65_P08103 | 1.52 | 0.042 |             |                     | REPEAT-SEQUENCE                                                   |
| Up at 6 hrs | A_65_P04104 | 1.51 | 0.040 | XM_178515.1 |                     | Mus musculus LOC269515 (LOC269515), mRNA                          |
| Up at 6 hrs | A_65_P04933 | 1.51 | 0.003 |             |                     | Intronic in U016229                                               |
| Up at 6 hrs | A_65_P05610 | 1.51 | 0.036 | XM_127856.1 | 2610311M19Rik       | Mus musculus similar to Antigen Ki-67 (LOC219153), mRNA           |
| Up at 6 hrs | A_65_P20182 | 1.51 | 0.027 | NM_023341.1 | 4632432J16Rik       | Mus musculus RIKEN cDNA 4632432J16 gene (4632432J16Rik), mRNA     |
| Up at 6 hrs | A_65_P16652 | 1.51 | 0.020 |             |                     | UNKNOWN                                                           |
| Up at 6 hrs | A_65_P04429 | 1.51 | 0.022 |             | D3Wsu174e           | UNKNOWN                                                           |
| Up at 6 hrs | A_65_P06329 | 1.51 | 0.016 | NM_145550.1 | C030002N13Rik       | Mus musculus similar to hypothetical protein DJ167A19.1 (LOC23058 |
| Up at 6 hrs | A_65_P06347 | 1.51 | 0.006 | NM_145448.1 | LOC217830           | Mus musculus similar to hypothetical protein FLJ20950 (LOC217830) |
| Up at 6 hrs | A_65_P16108 | 1.51 | 0.019 |             |                     | UNKNOWN                                                           |
| Up at 6 hrs | A_65_P01064 | 1.50 | 0.039 |             |                     | UNKNOWN                                                           |
| Up at 6 hrs | A_65_P05454 | 1.50 | 0.005 |             |                     | Intronic in U034731                                               |
| Up at 6 hrs | A_65_P01027 | 1.50 | 0.039 |             |                     | Intronic in U012611                                               |
| Up at 6 hrs | A_65_P05379 | 1.50 | 0.016 | NM_026186.2 | 1300013D05Rik       | Mus musculus RIKEN cDNA 1300013D05 gene (1300013D05Rik), mRNA     |
| Up at 6 hrs | A_65_P04199 | 1.50 | 0.027 | XM_136089.2 | C2pa;Rgs3           | Mus musculus regulator of G-protein signaling 3 (Rgs3), mRNA      |
| Up at 6 hrs | A_65_P07483 | 1.50 | 0.023 | NM_144911.1 | MGC27814            | Mus musculus hypothetical protein MGC27814 (MGC27814), mRNA       |
| Up at 6 hrs | A_65_P05386 | 1.50 | 0.046 |             |                     | Intronic in U000969                                               |
| Up at 6 hrs | A_65_P00636 | 1.50 | 0.001 | NM_025846.1 | Rras2               | UNKNOWN                                                           |
| Up at 6 hrs | A_65_P04708 | 1.50 | 0.025 | BC018512.1  | IRA1                | Mus musculus IRA1 protein (IRA1), mRNA                            |
| Up at 6 hrs | A_65_P06341 | 1.49 | 0.016 | NM_008984.1 | Ptprm               | Mus musculus protein tyrosine phosphatase, receptor-type, M (Ptpr |
| Up at 6 hrs | A_65_P07093 | 1.49 | 0.003 | NM_019718.1 | Arl3                | Mus musculus ADP-ribosylation-like 3 (Arl3), mRNA                 |
| Up at 6 hrs | A_65_P08812 | 1.49 | 0.002 | XM_126465.2 |                     | PROTEIN TRANSPORT PROTEIN SEC24 RELATED PROTEIN                   |
| Up at 6 hrs | A_65_P00856 | 1.49 | 0.047 |             | Ai448984            | UNKNOWN                                                           |
| Up at 6 hrs | A_65_P01066 | 1.49 | 0.042 | NM_025761.1 | 4933439C20Rik       | Mus musculus RIKEN cDNA 4933439C20 gene (4933439C20Rik), mRNA     |
| Up at 6 hrs | A_65_P04884 | 1.49 | 0.023 | NM_170593.1 | Disp2;Disp2-pending | similar to KIAA1742 PROTEIN (FRAGMENT) [Homo sapiens]             |
| Up at 6 hrs | A_65_P08866 | 1.49 | 0.031 | NM_026017.1 | Dullard             | Mus musculus Dullard homolog (Xenopus laevis) (Dullard), mRNA     |

|             |             |      |       |             |                      |                                                                   |
|-------------|-------------|------|-------|-------------|----------------------|-------------------------------------------------------------------|
| Up at 6 hrs | A_65_P12146 | 1.49 | 0.000 |             |                      | Intronic in U027138                                               |
| Up at 6 hrs | A_65_P02422 | 1.48 | 0.009 | NM_172742.1 | LOC233315            | Mus musculus hypothetical protein LOC233315 (LOC233315), mRNA     |
| Up at 6 hrs | A_65_P00935 | 1.48 | 0.009 | XM_125706.2 | 5133400C09Rik        | HYPOTHETICAL 27.6 KDA PROTEIN (FRAGMENT). [Source:SPTREMBL;Acc:Q9 |
| Up at 6 hrs | A_65_P04347 | 1.48 | 0.038 |             | 1500004A08Rik        | hypothetical Kringle containing protein                           |
| Up at 6 hrs | A_65_P13808 | 1.48 | 0.028 |             |                      | UNKNOWN                                                           |
| Up at 6 hrs | A_65_P06931 | 1.48 | 0.024 |             |                      | UNKNOWN                                                           |
| Up at 6 hrs | A_65_P07531 | 1.48 | 0.044 |             | Ilgav                | Intronic in U042324                                               |
| Up at 6 hrs | A_65_P06065 | 1.48 | 0.007 | AJ426432.1  | Trfr                 | Mus musculus transferrin receptor (Trfr), mRNA                    |
| Up at 6 hrs | A_65_P06262 | 1.48 | 0.032 | BC038477.1  | 4933421H10Rik        | Similar to: Mus musculus, Similar to cingulin, clone IMAGE:418814 |
| Up at 6 hrs | A_65_P02148 | 1.48 | 0.044 | XM_130558.1 | Bub1                 | budding uninhibited by benzimidazoles 1 homolog (S. cerevisiae)   |
| Up at 6 hrs | A_65_P05587 | 1.47 | 0.007 | NM_031198.1 | Tcfec                | Mus musculus transcription factor EC (Tcfec), mRNA                |
| Up at 6 hrs | A_65_P03691 | 1.47 | 0.019 | XM_132858.2 | Chd4                 | CHROMODOMAIN HELICASE DNA BINDING PROTEIN CHD MI 2 AUTOANTIGEN KD |
| Up at 6 hrs | A_65_P08449 | 1.47 | 0.023 |             |                      | Mus musculus LOC210415 (LOC210415), mRNA                          |
| Up at 6 hrs | A_65_P06348 | 1.47 | 0.037 |             | Hsp25-2              | Mus musculus heat shock protein 25 kDa 2 (cardiovascular) (Hsp25- |
| Up at 6 hrs | A_65_P08466 | 1.47 | 0.025 | NM_007869.1 | Dnajc1               | Mus musculus DnaJ (Hsp40) homolog, subfamily C, member 1 (Dnajc1) |
| Up at 6 hrs | A_65_P01589 | 1.47 | 0.004 | XM_125982.2 | Ogdh                 | oxoglutarate dehydrogenase (lipoamide) (EC 1.2.4.2) E1 component  |
| Up at 6 hrs | A_65_P01909 | 1.47 | 0.013 |             | Amotl1;2310067L22Rik | B-MOTIN (FRAGMENT) homolog [Homo sapiens]                         |
| Up at 6 hrs | A_65_P04342 | 1.46 | 0.005 |             | AU044698             | UNKNOWN                                                           |
| Up at 6 hrs | A_65_P02274 | 1.46 | 0.036 | XM_149811.2 |                      | Mus musculus LOC232540 (LOC232540), mRNA                          |
| Up at 6 hrs | A_65_P05107 | 1.46 | 0.030 | NM_019511.1 | Ramp3                | Mus musculus receptor (calcitonin) activity modifying protein 3 ( |
| Up at 6 hrs | A_65_P12470 | 1.46 | 0.032 | XM_130919.1 | 9130014L17Rik        | ADP RIBOSYLATION FACTOR                                           |
| Up at 6 hrs | A_65_P00563 | 1.46 | 0.025 | NM_008478.2 | L1cam                | Mus musculus L1 cell adhesion molecule (L1cam), mRNA              |
| Up at 6 hrs | A_65_P03265 | 1.46 | 0.008 | NM_011512.1 | Surf4                | Mus musculus surfet gene 4 (Surf4), mRNA                          |
| Up at 6 hrs | A_65_P05301 | 1.46 | 0.013 | NM_019225.1 | Slc1a3               | Mus musculus solute carrier family 1, member 3 (Slc1a3), mRNA     |
| Up at 6 hrs | A_65_P20458 | 1.46 | 0.035 | NM_007581.1 | Cacnb3               | Mus musculus calcium channel, voltage-dependent, beta 3 subunit ( |
| Up at 6 hrs | A_65_P07766 | 1.46 | 0.046 | NM_023275.1 | Arhj                 | TC10-like Rho GTPase FRAGMENT                                     |
| Up at 6 hrs | A_65_P07086 | 1.46 | 0.036 | NM_026312.1 | 2610029G23Rik        | Mus musculus RIKEN cDNA 2610029G23 gene (2610029G23Rik), mRNA     |
| Up at 6 hrs | A_65_P13375 | 1.46 | 0.040 | XM_128455.1 | LOC224698            | ADAMTS-10 (EC 3.4.24.-) (A DISINTEGRIN AND METALLOPROTEINASE WITH |
| Up at 6 hrs | A_65_P06962 | 1.45 | 0.038 | XM_127466.2 | 3110006E14Rik        | Mus musculus RIKEN cDNA 3110006E14 gene (3110006E14Rik), mRNA     |
| Up at 6 hrs | A_65_P01545 | 1.45 | 0.028 | NM_172438.1 | Fmip                 | PROTEIN C22ORF19 NF2/MENINGIOMA REGION PROTEIN PK1 3 PLACENTAL PR |
| Up at 6 hrs | A_65_P11176 | 1.45 | 0.035 | NM_024461.1 | 1810037I17Rik        | UNKNOWN                                                           |
| Up at 6 hrs | A_65_P09984 | 1.45 | 0.027 | NM_018884.1 | Semcap3-pending      | Mus musculus semaF cytoplasmic domain associated protein 3 (Semca |
| Up at 6 hrs | A_65_P11320 | 1.45 | 0.050 |             | Adamts2              | ADAMTS EC 3.4.24.- A DISINTEGRIN AND METALLOPROTEINASE WITH THROM |
| Up at 6 hrs | A_65_P03207 | 1.44 | 0.049 |             |                      | UNKNOWN                                                           |
| Up at 6 hrs | A_65_P06915 | 1.44 | 0.012 | NM_139229.2 | Cog8                 | Mus musculus RIKEN cDNA 2610019N19 gene (2610019N19Rik), mRNA     |
| Up at 6 hrs | A_65_P14742 | 1.44 | 0.025 |             |                      | Intronic in U033930                                               |
| Up at 6 hrs | A_65_P00968 | 1.44 | 0.040 |             | A930004D18Rik        | UNKNOWN                                                           |
| Up at 6 hrs | A_65_P03079 | 1.44 | 0.011 |             | 2410002I01Rik        | Intronic in U011458                                               |
| Up at 6 hrs | A_65_P04455 | 1.44 | 0.001 | NM_009378.1 | Thbd                 | Mus musculus thrombomodulin (Thbd), mRNA                          |
| Up at 6 hrs | A_65_P04706 | 1.44 | 0.031 |             | C80140               | UNKNOWN                                                           |
| Up at 6 hrs | A_65_P06451 | 1.44 | 0.012 | XM_124842.1 | Mkln1                | Mus musculus muskelin 1, intracellular mediator containing kelch  |
| Up at 6 hrs | A_65_P09900 | 1.44 | 0.012 | NM_010237.1 | Frk                  | B-CELL SRC-HOMOLOGY TYROSINE KINASE. [Source:RefSeq;Acc:NM_010237 |
| Up at 6 hrs | A_65_P00830 | 1.44 | 0.013 |             |                      | Intronic in U002663                                               |
| Up at 6 hrs | A_65_P05887 | 1.43 | 0.001 |             |                      | Intronic in U031265                                               |
| Up at 6 hrs | A_65_P04458 | 1.43 | 0.008 | NM_013907.1 | Fbxw4                | Mus musculus f-box and WD-40 domain protein 4 (Fbxw4), mRNA       |
| Up at 6 hrs | A_65_P03188 | 1.43 | 0.040 | NM_013896.1 | Timm10               | Mus musculus translocase of inner mitochondrial membrane 10 homol |
| Up at 6 hrs | A_65_P04255 | 1.43 | 0.035 |             |                      | UNKNOWN                                                           |
| Up at 6 hrs | A_65_P02068 | 1.43 | 0.005 | NM_010247.1 | G22p1                | UNKNOWN                                                           |
| Up at 6 hrs | A_65_P05578 | 1.43 | 0.029 | NM_025800.1 | Ppp1r2               | UNKNOWN                                                           |
| Up at 6 hrs | A_65_P02209 | 1.43 | 0.035 | AC008755.8  |                      | UNKNOWN                                                           |
| Up at 6 hrs | A_65_P17796 | 1.43 | 0.028 |             |                      | UNKNOWN                                                           |
| Up at 6 hrs | A_65_P20248 | 1.43 | 0.016 | XM_130329.2 | Neurod1              | NEUROGENIC DIFFERENTIATION FACTOR 1 (NEUROD1). [Source:SWISSPROT; |
| Up at 6 hrs | A_65_P05641 | 1.43 | 0.011 | NM_144825.1 | MGC29021             | Mus musculus RIKEN cDNA 2810468K05 gene (2810468K05Rik), mRNA     |
| Up at 6 hrs | A_65_P07489 | 1.42 | 0.022 | BC006020.1  | Sec61a               | Mus musculus SEC61, alpha subunit (S. cerevisiae) (Sec61a), mRNA  |
| Up at 6 hrs | A_65_P05765 | 1.42 | 0.001 | BC037175.1  | 8430404F20Rik        | 3 GROWTH RECEPTOR PRECURSOR EC 2.7.1.112 TYROSINE KINASE TRK      |
| Up at 6 hrs | A_65_P01454 | 1.42 | 0.037 | NM_172721.1 | Fbx29                | weakly similar to F-BOX PROTEIN FBX29 (FRAGMENT) [Homo sapiens]   |
| Up at 6 hrs | A_65_P08330 | 1.42 | 0.040 | BC031929.1  | Lifr                 | Mus musculus leukemia inhibitory factor receptor (Lifr), mRNA     |
| Up at 6 hrs | A_65_P09199 | 1.42 | 0.037 | NM_133800.1 | C78541               | Mus musculus expressed sequence C78541 (C78541), mRNA             |

|             |             |      |       |             |                 |                                                                   |
|-------------|-------------|------|-------|-------------|-----------------|-------------------------------------------------------------------|
| Up at 6 hrs | A_65_P01453 | 1.42 | 0.024 | NM_009419.1 | Tpst2           | Mus musculus protein-tyrosine sulfotransferase 2 (Tpst2), mRNA    |
| Up at 6 hrs | A_65_P06498 | 1.42 | 0.044 |             | Lypla1          | Mus musculus lysophospholipase 1 (Lypla1), mRNA                   |
| Up at 6 hrs | A_65_P08644 | 1.42 | 0.045 | XM_132021.1 | 5430419M09Rik   | HYPOTHETICAL 43.0 KDA PROTEIN. [Source:SPTREMBL;Acc:Q91VG1]       |
| Up at 6 hrs | A_65_P02502 | 1.42 | 0.046 |             |                 | Intronic in U035134                                               |
| Up at 6 hrs | A_65_P04146 | 1.42 | 0.033 | NM_172777.1 | E430029F06      | Mus musculus macrophage activation 2 (Mpa2), mRNA                 |
| Up at 6 hrs | A_65_P06996 | 1.41 | 0.000 | NM_008894.1 | Pold2           | Mus musculus polymerase (DNA directed), delta 2, regulatory subun |
| Up at 6 hrs | A_65_P00769 | 1.41 | 0.050 | NM_144941.1 | BC019977        | Mus musculus cDNA sequence BC019977 (BC019977), mRNA              |
| Up at 6 hrs | A_65_P11883 | 1.41 | 0.020 | AK021126.1  | C030036K04Rik   | weakly similar to CDNA FLJ14503 FIS, CLONE NT2RM1000252, WEAKLY S |
| Up at 6 hrs | A_65_P13888 | 1.41 | 0.026 | NM_009895.1 | Cish            | UNKNOWN                                                           |
| Up at 6 hrs | A_65_P03116 | 1.41 | 0.026 |             | 1700023F20Rik   | hypothetical Galactose-binding domain-like structure containing p |
| Up at 6 hrs | A_65_P05349 | 1.41 | 0.038 |             |                 | UNKNOWN                                                           |
| Up at 6 hrs | A_65_P05067 | 1.41 | 0.018 | BC026127.1  | Csnk1e          | Mus musculus casein kinase 1, epsilon (Csnk1e), mRNA              |
| Up at 6 hrs | A_65_P08273 | 1.41 | 0.008 | NM_013477.1 | Atp6v0d1        | Mus musculus ATPase, H+ transporting, lysosomal 38kDa, V0 subunit |
| Up at 6 hrs | A_65_P16999 | 1.41 | 0.009 | NM_025448.1 | Ssr2            | TRANSLOCAN ASSOCIATED PROTEIN, BETA SUBUNIT PRECURSOR TRAP BETA S |
| Up at 6 hrs | A_65_P03025 | 1.40 | 0.048 | NM_030210.1 | 2210408B16Rik   | Mus musculus RIKEN cDNA 2210408B16 gene (2210408B16Rik), mRNA     |
| Up at 6 hrs | A_65_P00535 | 1.40 | 0.002 | XM_150050.2 |                 | LEUCINE ZIPPER                                                    |
| Up at 6 hrs | A_65_P19512 | 1.40 | 0.029 | XM_129141.1 | AA589382        | NEUROBLAST DIFFERENTIATION ASSOCIATED PROTEIN AHNAK DESMOYOKIN    |
| Up at 6 hrs | A_65_P01701 | 1.40 | 0.036 | NM_008095.1 | Gbas            | Mus musculus glioblastoma amplified sequence (Gbas), mRNA         |
| Up at 6 hrs | A_65_P04060 | 1.40 | 0.041 | NM_134025.1 | AI451906        | Mus musculus expressed sequence AI451906 (AI451906), mRNA         |
| Up at 6 hrs | A_65_P06072 | 1.40 | 0.028 | NM_145396.1 | Tbl3            | Mus musculus similar to transducin beta-like 3; WD-repeat protein |
| Up at 6 hrs | A_65_P04385 | 1.40 | 0.013 | XM_134367.2 | LOC234699       | SIMILAR TO AUTOANTIGEN                                            |
| Up at 6 hrs | A_65_P07393 | 1.40 | 0.020 | NM_133395.1 | Tpo1            | DIFFERENTIALLY EXPRESSED                                          |
| Up at 6 hrs | A_65_P00567 | 1.40 | 0.041 |             |                 | UNKNOWN                                                           |
| Up at 6 hrs | A_65_P00655 | 1.40 | 0.043 |             |                 | UNKNOWN                                                           |
| Up at 6 hrs | A_65_P04354 | 1.40 | 0.016 | BC005453.1  | Nmyc1           | Mus musculus neuroblastoma myc-related oncogene 1 (Nmyc1), mRNA   |
| Up at 6 hrs | A_65_P01706 | 1.39 | 0.027 |             |                 | Similar to: Mus musculus similar to DKFZP434D1335 protein [Homo s |
| Up at 6 hrs | A_65_P01398 | 1.39 | 0.047 | NM_013919.1 | Usp21           | ubiquitin specific protease 23                                    |
| Up at 6 hrs | A_65_P19837 | 1.39 | 0.008 | NM_009323.1 | Tbx15           | Mus musculus T-box 14 (Tbx14), mRNA                               |
| Up at 6 hrs | A_65_P11137 | 1.39 | 0.038 |             | Cts8            | Mus musculus cathepsin 8 (Cts8), mRNA                             |
| Up at 6 hrs | A_65_P00979 | 1.39 | 0.021 |             | Ncor1           | Mus musculus nuclear receptor co-repressor 1 (Ncor1), mRNA        |
| Up at 6 hrs | A_65_P04094 | 1.39 | 0.007 | XM_133217.2 | 1600029N02Rik   | ECHINODERM MICROTUBULE ASSOCIATED PROTEIN LIKE EMAP               |
| Up at 6 hrs | A_65_P05851 | 1.39 | 0.047 | AK014039.1  | D730049P16Rik   | Mus musculus 13 days embryo head cDNA, RIKEN full-length enriched |
| Up at 6 hrs | A_65_P10491 | 1.39 | 0.013 |             |                 | Intronic in U021380                                               |
| Up at 6 hrs | A_65_P17994 | 1.38 | 0.014 |             |                 | UNKNOWN                                                           |
| Up at 6 hrs | A_65_P14271 | 1.38 | 0.021 | NM_029096.1 | 1110008J03Rik   | Mus musculus RIKEN cDNA 1110008J03 gene (1110008J03Rik), mRNA     |
| Up at 6 hrs | A_65_P04996 | 1.38 | 0.041 | NM_133704.1 | Sec22i2         | Mus musculus RIKEN cDNA 1810005C06 gene (1810005C06Rik), mRNA     |
| Up at 6 hrs | A_65_P10083 | 1.38 | 0.021 | XM_129647.1 | Eprs            | BIFUNCTIONAL AMINOACYL TRNA SYNTHETASE [INCLUDES: GLUTAMYL TRNA S |
| Up at 6 hrs | A_65_P10473 | 1.38 | 0.014 |             |                 | Intronic in U015238                                               |
| Up at 6 hrs | A_65_P14615 | 1.38 | 0.042 |             | Vdr             | Mus musculus vitamin D receptor (Vdr), mRNA                       |
| Up at 6 hrs | A_65_P05670 | 1.38 | 0.013 | BC038483.1  | Akap10          | Mus musculus A kinase (PRKA) anchor protein 10 (Akap10), mRNA     |
| Up at 6 hrs | A_65_P01831 | 1.38 | 0.029 | NM_008638.1 | Mthfd2          | UNKNOWN                                                           |
| Up at 6 hrs | A_65_P09322 | 1.37 | 0.009 | AK017246.1  | Gt(ROSA)26asSor | Mus musculus gene trap ROSA 26 antisense, Philippe Soriano (Gt(RO |
| Up at 6 hrs | A_65_P03893 | 1.37 | 0.021 |             |                 | UNKNOWN                                                           |
| Up at 6 hrs | A_65_P12523 | 1.37 | 0.006 | NM_011340.1 | Serpinf1        | Mus musculus serine (or cysteine) proteinase inhibitor, clade F), |
| Up at 6 hrs | A_65_P04277 | 1.37 | 0.013 | NM_010228.1 | Flt1            | Mus musculus FMS-like tyrosine kinase 1 (Flt1), mRNA              |
| Up at 6 hrs | A_65_P12852 | 1.37 | 0.015 |             | C77649          | UNKNOWN                                                           |
| Up at 6 hrs | A_65_P01494 | 1.37 | 0.039 | NM_027871.1 | Arhgef3         | UNKNOWN                                                           |
| Up at 6 hrs | A_65_P10874 | 1.37 | 0.003 |             |                 | UNKNOWN                                                           |
| Up at 6 hrs | A_65_P10229 | 1.37 | 0.042 |             | AV024533        | Intronic in U037445                                               |
| Up at 6 hrs | A_65_P09867 | 1.36 | 0.020 | NM_028072.1 | 2010004N24Rik   | Mus musculus RIKEN cDNA 2010004N24 gene (2010004N24Rik), mRNA     |
| Up at 6 hrs | A_65_P13892 | 1.36 | 0.028 | BC018481.1  | 4933428G09Rik   | Mus musculus RIKEN cDNA 4933428G09 gene (4933428G09Rik), mRNA     |
| Up at 6 hrs | A_65_P04839 | 1.36 | 0.043 | NM_019783.1 | Lepre1          | Mus musculus leprecan 1 (Lepre1), mRNA                            |
| Up at 6 hrs | A_65_P05821 | 1.36 | 0.027 | NM_026995.1 | 2810407E01Rik   | Mus musculus RIKEN cDNA 2810407E01 gene (2810407E01Rik), mRNA     |
| Up at 6 hrs | A_65_P01379 | 1.36 | 0.027 | BC034789.1  | 2810411E22Rik   | SMAD UBIQUITINATION REGULATORY FACTOR 1 EC 6.3.2.- UBIQUITIN PROT |
| Up at 6 hrs | A_65_P05226 | 1.36 | 0.033 | AY014780.1  |                 | UNKNOWN                                                           |
| Up at 6 hrs | A_65_P06832 | 1.36 | 0.041 |             |                 | UNKNOWN                                                           |
| Up at 6 hrs | A_65_P09426 | 1.36 | 0.035 | XM_132015.1 | LOC231128       | Mus musculus similar to gene with multiple splice variants near H |
| Up at 6 hrs | A_65_P03001 | 1.36 | 0.005 | NM_008284.1 | Hras1           | Mus musculus Harvey rat sarcoma virus oncogene (Hras1), mRNA      |



|             |             |      |       |             |               |                                                                    |
|-------------|-------------|------|-------|-------------|---------------|--------------------------------------------------------------------|
| Up at 6 hrs | A_65_P01137 | 1.36 | 0.021 | NM_030566.1 | 2610011A08Rik | Mus musculus expressed sequence A1462746 (A1462746), mRNA          |
| Up at 6 hrs | A_65_P05260 | 1.35 | 0.039 | BC029772.1  |               | Mus musculus, clone IMAGE:4947691, mRNA                            |
| Up at 6 hrs | A_65_P01399 | 1.35 | 0.044 |             |               | Intronic in U005379                                                |
| Up at 6 hrs | A_65_P05335 | 1.35 | 0.006 | NM_145544.1 | LOC229877     | Mus musculus similar to guanine nucleotide exchange factor smgGDS  |
| Up at 6 hrs | A_65_P03604 | 1.35 | 0.037 | BC016117.1  | 2510010F15Rik | Mus musculus RIKEN cDNA 2510010F15 gene (2510010F15Rik), mRNA      |
| Up at 6 hrs | A_65_P09866 | 1.35 | 0.018 | NM_133733.1 | 9030425E11Rik | Mus musculus RIKEN cDNA 9030425E11 gene (9030425E11Rik), mRNA      |
| Up at 6 hrs | A_65_P01213 | 1.35 | 0.021 |             | 1700017B05Rik | RIKEN cDNA 1700017B05 gene                                         |
| Up at 6 hrs | A_65_P09744 | 1.35 | 0.011 |             | BB101821      | Intronic in U043105                                                |
| Up at 6 hrs | A_65_P04337 | 1.35 | 0.014 | NM_009536.1 | Ywhae         | Mus musculus tyrosine 3-monoxygenase/tryptophan 5-monoxygenase     |
| Up at 6 hrs | A_65_P01143 | 1.34 | 0.031 |             |               | Intronic in U015380                                                |
| Up at 6 hrs | A_65_P06058 | 1.34 | 0.040 | XM_180135.1 | Atrx          | Mus musculus LOC263361 (LOC263361), mRNA                           |
| Up at 6 hrs | A_65_P08628 | 1.34 | 0.010 | NM_016739.1 | Gpiap1        | Mus musculus GPI-anchored membrane protein 1 (Gpiap1), mRNA        |
| Up at 6 hrs | A_65_P04899 | 1.34 | 0.047 | XM_151480.1 |               | Intronic in U042192                                                |
| Up at 6 hrs | A_65_P08418 | 1.34 | 0.045 | XM_132649.2 | AJ237586      | Mus musculus hypothetical protein, clone MTA.D02.090 (AJ237586),   |
| Up at 6 hrs | A_65_P09076 | 1.34 | 0.007 | NM_026455.1 | 2510049I19Rik | Mus musculus RIKEN cDNA 2510049I19 gene (2510049I19Rik), mRNA      |
| Up at 6 hrs | A_65_P06917 | 1.34 | 0.033 | NM_134139.1 | AA407588      | Mus musculus expressed sequence AA407588 (AA407588), mRNA          |
| Up at 6 hrs | A_65_P03032 | 1.34 | 0.031 | NM_012043.1 | Islr          | REPEAT-SEQUENCE                                                    |
| Up at 6 hrs | A_65_P08697 | 1.34 | 0.004 | NM_010100.1 | Edar          | Mus musculus ectodysplasin-A receptor (Edar), mRNA                 |
| Up at 6 hrs | A_65_P11608 | 1.34 | 0.040 |             |               | UNKNOWN                                                            |
| Up at 6 hrs | A_65_P16091 | 1.34 | 0.043 | NM_153533.1 | C1-ten        | Mus musculus tensin 2 (LOC209039), mRNA                            |
| Up at 6 hrs | A_65_P05447 | 1.33 | 0.005 | NM_010580.1 | Itgb5         | Mus musculus integrin beta 5 (Itgb5), mRNA                         |
| Up at 6 hrs | A_65_P02009 | 1.33 | 0.017 | AK013968.1  | 3110001N23Rik | Intronic in U026779                                                |
| Up at 6 hrs | A_65_P03022 | 1.33 | 0.049 | AK013228.1  | 2810432N10Rik | TYROSINE PHOSPHATASE homolog [Homo sapiens]                        |
| Up at 6 hrs | A_65_P00785 | 1.33 | 0.012 | XM_134224.2 | 2410153K17Rik | hypothetical Armadillo repeat containing protein                   |
| Up at 6 hrs | A_65_P19524 | 1.33 | 0.019 |             |               | UNKNOWN                                                            |
| Up at 6 hrs | A_65_P01510 | 1.33 | 0.005 | NM_023053.1 | Twg-pending   | Mus musculus twisted gastrulation protein (Twg-pending), mRNA      |
| Up at 6 hrs | A_65_P02101 | 1.33 | 0.030 | NM_011915.1 | Wif1          | Mus musculus Wnt inhibitory factor 1 (Wif1), mRNA                  |
| Up at 6 hrs | A_65_P02388 | 1.33 | 0.024 |             |               | UNKNOWN                                                            |
| Up at 6 hrs | A_65_P01530 | 1.33 | 0.047 | BC011058.1  | Lrp10         | Mus musculus low-density lipoprotein receptor-related protein 10   |
| Up at 6 hrs | A_65_P06377 | 1.33 | 0.010 | BC003209.1  | LOC229543     | Mus musculus similar to hypothetical protein FLJ21919 (LOC229543)  |
| Up at 6 hrs | A_65_P01085 | 1.33 | 0.013 | NM_026444.1 | Cs            | Mus musculus citrate synthase (Cs), mRNA                           |
| Up at 6 hrs | A_65_P05913 | 1.33 | 0.041 |             |               | UNKNOWN                                                            |
| Up at 6 hrs | A_65_P11438 | 1.33 | 0.011 |             | D16Ert6e      | UNKNOWN                                                            |
| Up at 6 hrs | A_65_P00758 | 1.33 | 0.017 |             |               | UNKNOWN                                                            |
| Up at 6 hrs | A_65_P02560 | 1.33 | 0.018 | XM_132397.2 | 0610007L01Rik | Mus musculus RIKEN cDNA 0610007L01 gene (0610007L01Rik), mRNA      |
| Up at 6 hrs | A_65_P03869 | 1.33 | 0.035 | XM_130317.2 | 1810020C19Rik | weakly similar to PROSTATE CANCER ANTIGEN-1 [Homo sapiens]         |
| Up at 6 hrs | A_65_P03017 | 1.32 | 0.005 |             | 5730497N19Rik | PROTEIN KINASE C, TYPE EC 2.7.1.- NPKC PROTEIN KINASE              |
| Up at 6 hrs | A_65_P19318 | 1.32 | 0.027 | AK016528.1  | 4932416J16Rik | Intronic in U004518                                                |
| Up at 6 hrs | A_65_P11780 | 1.32 | 0.024 | NM_019304.1 |               | UNKNOWN                                                            |
| Up at 6 hrs | A_65_P01011 | 1.32 | 0.024 | NM_011796.1 | Capn10        | Mus musculus calpain 10 (Capn10), mRNA                             |
| Up at 6 hrs | A_65_P06310 | 1.32 | 0.027 | NM_026198.1 | 2010200O16Rik | Mus musculus RIKEN cDNA 2010200O16 gene (2010200O16Rik), mRNA      |
| Up at 6 hrs | A_65_P00862 | 1.32 | 0.002 | NM_134058.1 | Pelo          | Mus musculus expressed sequence AA409897 (AA409897), mRNA          |
| Up at 6 hrs | A_65_P00922 | 1.32 | 0.027 | XM_128902.2 | A730017C20    | Mus musculus similar to KIAA1024 protein [Homo sapiens] (LOC22558) |
| Up at 6 hrs | A_65_P04906 | 1.32 | 0.011 | NM_011062.1 | Pdpk1         | Mus musculus 3-phosphoinositide dependent protein kinase-1 (Pdpk1) |
| Up at 6 hrs | A_65_P02116 | 1.32 | 0.021 | BC026509.1  | Abcc1         | ATP-binding cassette, sub-family C (CFTR/MRP), member 1a           |
| Up at 6 hrs | A_65_P16612 | 1.32 | 0.046 | XM_129845.2 | Fn1           | FIBRONECTIN PRECURSOR (FN) (FRAGMENTS). [Source:SWISSPROT;Acc:P11  |
| Up at 6 hrs | A_65_P10839 | 1.32 | 0.021 |             |               | UNKNOWN                                                            |
| Up at 6 hrs | A_65_P11139 | 1.32 | 0.010 | NM_030695.1 | Lrba          | Mus musculus LPS-responsive beige-like anchor (Lrba), mRNA         |
| Up at 6 hrs | A_65_P19313 | 1.32 | 0.027 | BC005491.1  | Col6a3        | TYPE VI COLLAGEN ALPHA 3 SUBUNIT. [Source:SPTREMBL;Acc:O88493]     |
| Up at 6 hrs | A_65_P02989 | 1.32 | 0.017 | NM_011313.1 | S100a6        | Mus musculus S100 calcium binding protein A6 (calyculin) (S100a6)  |
| Up at 6 hrs | A_65_P05039 | 1.31 | 0.010 | BC016444.1  | Hmx3          | Mus musculus RIKEN cDNA 4930563C04 gene (4930563C04Rik), mRNA      |
| Up at 6 hrs | A_65_P06805 | 1.31 | 0.040 | XM_125684.2 | D10Ucla1      | Similar to: Mus musculus, clone IMAGE:5355681, mRNA                |
| Up at 6 hrs | A_65_P04388 | 1.31 | 0.028 | NM_016894.1 | Ramp1         | Mus musculus receptor (calcitonin) activity modifying protein 1 (  |
| Up at 6 hrs | A_65_P02577 | 1.31 | 0.044 | NM_021504.1 | Ngly1         | peptide N-glycanase homolog (S.cerevisiae)                         |
| Up at 6 hrs | A_65_P03882 | 1.31 | 0.037 |             |               | UNKNOWN                                                            |
| Up at 6 hrs | A_65_P07511 | 1.31 | 0.045 |             |               | Intronic in U009257                                                |
| Up at 6 hrs | A_65_P16403 | 1.31 | 0.044 | NM_011697.1 | Vegfb         | Mus musculus vascular endothelial growth factor B (Vegfb), mRNA    |
| Up at 6 hrs | A_65_P01486 | 1.31 | 0.001 | NM_133933.1 | Rpn1          | Mus musculus expressed sequence AU018702 (AU018702), mRNA          |

|             |             |      |       |             |               |                                                                   |
|-------------|-------------|------|-------|-------------|---------------|-------------------------------------------------------------------|
| Up at 6 hrs | A_65_P20570 | 1.31 | 0.045 | NM_023166.1 | Mtvr2         | Mus musculus Sjogrens syndrome/scleroderma autoantigen 1 homolog  |
| Up at 6 hrs | A_65_P00967 | 1.31 | 0.042 |             |               | Intronic in U042649                                               |
| Up at 6 hrs | A_65_P03010 | 1.31 | 0.009 |             | 1110021N07Rik | Mus musculus RIKEN cDNA 1110021N07 gene (1110021N07Rik), mRNA     |
| Up at 6 hrs | A_65_P05118 | 1.31 | 0.016 | NM_153112.1 | Tsl12         | UNKNOWN                                                           |
| Up at 6 hrs | A_65_P07786 | 1.31 | 0.014 |             |               | UNKNOWN                                                           |
| Up at 6 hrs | A_65_P07790 | 1.31 | 0.020 | XM_131472.1 | Kif12         | KINESIN 12. [Source:SPTREMBL;Acc:Q9D2Z8]                          |
| Up at 6 hrs | A_65_P09284 | 1.31 | 0.011 | NM_172782.1 | 6330587F24    | NTF2 RELATED EXPORT PROTEIN                                       |
| Up at 6 hrs | A_65_P09849 | 1.31 | 0.023 | XM_127811.1 | 1700020M16Rik | weakly similar to HYPOTHETICAL 50.0 KDA PROTEIN (FRAGMENT) [Homo  |
| Up at 6 hrs | A_65_P04951 | 1.31 | 0.010 | NM_053015.1 | Mlph          | Mus musculus melanophilin (Mlph), mRNA                            |
| Up at 6 hrs | A_65_P05290 | 1.31 | 0.042 | BC029312.1  | 1210001E11Rik | Mus musculus RIKEN cDNA 1210001E11 gene (1210001E11Rik), mRNA     |
| Up at 6 hrs | A_65_P08420 | 1.31 | 0.036 | AK018114.1  |               | UNKNOWN                                                           |
| Up at 6 hrs | A_65_P01605 | 1.31 | 0.019 | BC012646.1  | Nr1h3         | Mus musculus nuclear receptor subfamily 1, group H, member 3 (Nr1 |
| Up at 6 hrs | A_65_P03594 | 1.31 | 0.011 | XM_130249.1 | 1200003E16Rik | hypothetical Ankyrin repeat profile/Serine-rich region/Ankyrin-re |
| Up at 6 hrs | A_65_P16177 | 1.30 | 0.002 |             | AU040986      | UNKNOWN                                                           |
| Up at 6 hrs | A_65_P02935 | 1.30 | 0.042 |             |               | UNKNOWN                                                           |
| Up at 6 hrs | A_65_P02937 | 1.30 | 0.036 | BC004798.1  | 2310011G17Rik | Mus musculus, Similar to ELK4, member of ETS oncogene family, clo |
| Up at 6 hrs | A_65_P06142 | 1.30 | 0.003 | NM_014947.1 | 1300010C19Rik | FORKHEAD BOX PROTEIN J2 FORK HEAD HOMOLOGOUS                      |
| Up at 6 hrs | A_65_P08782 | 1.30 | 0.047 | XM_130218.2 | 4432404J10Rik | UNKNOWN                                                           |
| Up at 6 hrs | A_65_P05771 | 1.30 | 0.004 | NM_017397.1 | Ddx20         | Mus musculus DEAD/H (Asp-Glu-Ala-Asp/His) box polypeptide 20 (Ddx |
| Up at 6 hrs | A_65_P20009 | 1.30 | 0.041 |             |               | Intronic in U029378                                               |
| Up at 6 hrs | A_65_P04913 | 1.29 | 0.037 | NM_053181.1 | AA415817      | hypothetical Pyridoxal-dependent decarboxylase family containing  |
| Up at 6 hrs | A_65_P09966 | 1.29 | 0.024 |             |               | UNKNOWN                                                           |
| Up at 6 hrs | A_65_P01885 | 1.29 | 0.007 | XM_131715.2 | 4833436O05    | EUKARYOTIC TRANSLATION INITIATION FACTOR 4 GAMMA EIF 4 GAMMA EIF  |
| Up at 6 hrs | A_65_P04717 | 1.29 | 0.013 | XM_128152.1 | Pmm1          | PHOSPHOMANNUTASE 1 (EC 5.4.2.8) (PMM 1). [Source:SWISSPROT;Acc:   |
| Up at 6 hrs | A_65_P15262 | 1.29 | 0.050 | AY075652.1  |               | UNKNOWN                                                           |
| Up at 6 hrs | A_65_P16982 | 1.29 | 0.020 | NM_025357.1 | Smpx          | Mus musculus small muscle protein, X-linked (Smpx), mRNA          |
| Up at 6 hrs | A_65_P02095 | 1.29 | 0.018 | NM_021468.1 | Unc13h1       | Mus musculus unc13 homolog (C. elegans) 1 (Unc13h1), mRNA         |
| Up at 6 hrs | A_65_P06346 | 1.29 | 0.021 | NM_011950.1 | Mapk13        | Mus musculus mitogen activated protein kinase 13 (Mapk13), mRNA   |
| Up at 6 hrs | A_65_P01164 | 1.29 | 0.023 | NM_007494.1 | Ass1          | Mus musculus argininosuccinate synthetase 1 (Ass1), mRNA          |
| Up at 6 hrs | A_65_P05799 | 1.29 | 0.019 | NM_007874.1 | Dp1           | Mus musculus deleted in polyposis 1 (Dp1), mRNA                   |
| Up at 6 hrs | A_65_P12075 | 1.29 | 0.033 |             | AI451606      | SIMILAR TO RIKEN CDNA N01                                         |
| Up at 6 hrs | A_65_P02438 | 1.29 | 0.017 |             |               | REPEAT-SEQUENCE                                                   |
| Up at 6 hrs | A_65_P18651 | 1.29 | 0.016 |             | Prkab2        | 5 AMP ACTIVATED PROTEIN KINASE, BETA 1 SUBUNIT AMPK BETA 1 CHAIN  |
| Up at 6 hrs | A_65_P01401 | 1.28 | 0.013 | BC010331.1  | Rnh1          | Mus musculus ribonuclease/angiogenin inhibitor 1 (Rnh1), mRNA     |
| Up at 6 hrs | A_65_P02432 | 1.28 | 0.027 | BC018542.1  | LOC213819     | Mus musculus similar to C7ORF12 (LOC213819), mRNA                 |
| Up at 6 hrs | A_65_P05534 | 1.28 | 0.037 |             |               | Intronic in U017147                                               |
| Up at 6 hrs | A_65_P05618 | 1.28 | 0.008 | AK012546.1  | 6330540D07Rik | DNA SEGMENT, CHR 11, WAYNE STATE UNIVERSITY 99,                   |
| Up at 6 hrs | A_65_P04484 | 1.28 | 0.014 | NM_028800.1 | 2310004N11Rik | Mus musculus RIKEN cDNA 2310004N11 gene (2310004N11Rik), mRNA     |
| Up at 6 hrs | A_65_P14081 | 1.28 | 0.030 | BC024501.1  | Lgtn          | LIGATIN (FRAGMENT). [Source:SWISSPROT;Acc:Q61211]                 |
| Up at 6 hrs | A_65_P08123 | 1.28 | 0.017 | NM_010443.1 | Hmox2         | Mus musculus heme oxygenase (decycling) 2 (Hmox2), mRNA           |
| Up at 6 hrs | A_65_P01161 | 1.28 | 0.020 | XM_128028.2 | Ppp1r16a      | MYOSIN PHOSPHATASE TARGETING SUBUNIT 3 MYPT3 (FRAGMENT). [Source: |
| Up at 6 hrs | A_65_P08904 | 1.28 | 0.015 | BC022696.1  | Dusp12        | Mus musculus dual specificity phosphatase 12 (Dusp12), mRNA       |
| Up at 6 hrs | A_65_P00587 | 1.28 | 0.013 | XM_130690.1 | Ube2v1        | UNKNOWN                                                           |
| Up at 6 hrs | A_65_P05511 | 1.28 | 0.012 | NM_134059.1 | 2900024F02Rik | Mus musculus RIKEN cDNA 2900024F02 gene (2900024F02Rik), mRNA     |
| Up at 6 hrs | A_65_P05980 | 1.28 | 0.029 | XM_132022.1 | 2610033H07Rik | SIMILAR TO GENE NEAR HD ON 4P16 3 WITH HOMOLOGY TO HYPOTHETICAL S |
| Up at 6 hrs | A_65_P02657 | 1.28 | 0.008 |             |               | UNKNOWN                                                           |
| Up at 6 hrs | A_65_P05413 | 1.28 | 0.049 | AL080064.1  | AI504915      | PROTEIN TRANSPORT PROTEIN SEC24 RELATED PROTEIN                   |
| Up at 6 hrs | A_65_P06510 | 1.28 | 0.003 | XM_129351.1 | AA536972      | Mus musculus expressed sequence AA536972 (AA536972), mRNA         |
| Up at 6 hrs | A_65_P17150 | 1.28 | 0.004 | NM_017211.1 | Selel         | Mus musculus selectin, endothelial cell, ligand (Selel), mRNA     |
| Up at 6 hrs | A_65_P05159 | 1.27 | 0.004 | NM_011961.1 | Plod2         | Mus musculus procollagen lysine, 2-oxoglutarate 5-dioxygenase 2 ( |
| Up at 6 hrs | A_65_P09709 | 1.27 | 0.036 | BC031529.1  | Fac3          | LONG CHAIN FATTY ACID COA LIGASE EC 6.2.1.3 LONG CHAIN ACYL COA S |
| Up at 6 hrs | A_65_P01450 | 1.27 | 0.034 | NM_029297.1 | Dncl2b        | BITHORAXOID LIKE PROTEIN                                          |
| Up at 6 hrs | A_65_P03260 | 1.27 | 0.003 |             |               | UNKNOWN                                                           |
| Up at 6 hrs | A_65_P08854 | 1.27 | 0.030 |             |               | UNKNOWN                                                           |
| Up at 6 hrs | A_65_P02816 | 1.27 | 0.017 |             | Ank3          | Mus musculus ankyrin 3, epithelial (Ank3), mRNA                   |
| Up at 6 hrs | A_65_P03532 | 1.27 | 0.048 | XM_123455.1 | Got1          | Mus musculus glutamate oxaloacetate transaminase 1, soluble (Got1 |
| Up at 6 hrs | A_65_P08563 | 1.27 | 0.001 | NM_026695.1 | 0610009I16Rik | Mus musculus RIKEN cDNA 0610009I16 gene (0610009I16Rik), mRNA     |
| Up at 6 hrs | A_65_P06779 | 1.27 | 0.033 | NM_139297.1 | Ugp2          | Mus musculus UDP-glucose pyrophosphorylase 2 (Ugp2), mRNA         |

|             |             |      |       |             |               |                                                                    |
|-------------|-------------|------|-------|-------------|---------------|--------------------------------------------------------------------|
| Up at 6 hrs | A_65_P07758 | 1.27 | 0.016 | XM_134808.1 | Dlat          | UNKNOWN                                                            |
| Up at 6 hrs | A_65_P10404 | 1.27 | 0.014 |             |               | Intronic in U022116                                                |
| Up at 6 hrs | A_65_P01176 | 1.27 | 0.004 |             |               | UNKNOWN                                                            |
| Up at 6 hrs | A_65_P02633 | 1.27 | 0.011 | M21836.1    | Krt2-8        | Mus musculus keratin complex 2, basic, gene 8 (Krt2-8), mRNA       |
| Up at 6 hrs | A_65_P02823 | 1.27 | 0.013 | XM_140774.2 |               | similar to FRAT2 [Homo sapiens]                                    |
| Up at 6 hrs | A_65_P17291 | 1.27 | 0.016 | BC032206.1  | Nckap1        | UNKNOWN                                                            |
| Up at 6 hrs | A_65_P00666 | 1.27 | 0.041 | XM_134782.2 |               | UBIQUITIN CARBOXYL TERMINAL HYDROLASE 25 EC 3.1.2.15 UBIQUITIN TH  |
| Up at 6 hrs | A_65_P14611 | 1.27 | 0.024 | NM_013473.2 | Anxa8         | Mus musculus annexin A8 (Anxa8), mRNA                              |
| Up at 6 hrs | A_65_P05484 | 1.26 | 0.016 | BC003338.1  | Ptk9l         | Mus musculus protein tyrosine kinase 9-like (A6-related            |
| Up at 6 hrs | A_65_P09399 | 1.26 | 0.037 | NM_026035.1 | Mrpl55        | Mus musculus mitochondrial ribosomal protein L55 (Mrpl55), mRNA    |
| Up at 6 hrs | A_65_P03027 | 1.26 | 0.005 | NM_027175.1 | Ndufaf1       | Mus musculus NADH dehydrogenase (ubiquinone) 1 alpha subcomplex,   |
| Up at 6 hrs | A_65_P01033 | 1.26 | 0.006 | XM_132230.1 | 1810024J13Rik | Similar to: Mus musculus RIKEN cDNA 1810024J13 gene (1810024J13Ri  |
| Up at 6 hrs | A_65_P05028 | 1.26 | 0.004 | NM_133683.1 | 2810428F02Rik | OVARC1000959 PROTEIN homolog [Homo sapiens]                        |
| Up at 6 hrs | A_65_P08287 | 1.26 | 0.038 | NM_019767.1 | Arcp1a        | Mus musculus actin related protein 2/3 complex, subunit 1A (41 kD  |
| Up at 6 hrs | A_65_P00639 | 1.26 | 0.043 |             |               | UNKNOWN                                                            |
| Up at 6 hrs | A_65_P03871 | 1.26 | 0.020 | XM_144916.2 | mKIAA1842     | REPEAT-SEQUENCE                                                    |
| Up at 6 hrs | A_65_P04734 | 1.26 | 0.018 | BC009091.1  | Zfp162        | Mus musculus zinc finger protein 162 (Zfp162), mRNA                |
| Up at 6 hrs | A_65_P10847 | 1.26 | 0.037 | NM_145518.1 | LOC227197     | Mus musculus similar to NADH-ubiquinone oxidoreductase 75 kDa sub  |
| Up at 6 hrs | A_65_P11117 | 1.26 | 0.031 | XM_129882.2 | Des           | DESMIN. [Source:SWISSPROT;Acc:P31001]                              |
| Up at 6 hrs | A_65_P00977 | 1.26 | 0.030 |             |               | UNKNOWN                                                            |
| Up at 6 hrs | A_65_P08886 | 1.26 | 0.043 | NM_009864.1 | Cdh1          | Mus musculus cadherin 1 (Cdh1), mRNA                               |
| Up at 6 hrs | A_65_P06929 | 1.26 | 0.043 | NM_025486.1 | 1700006C06Rik | Mus musculus RIKEN cDNA 1700006C06 gene (1700006C06Rik), mRNA      |
| Up at 6 hrs | A_65_P18507 | 1.25 | 0.032 | NM_010163.1 | Ext2          | Mus musculus exostoses (multiple) 2 (Ext2), mRNA                   |
| Up at 6 hrs | A_65_P04897 | 1.25 | 0.029 | XM_130674.2 | 1700126L10Rik | Mus musculus RIKEN cDNA 2610042O14 gene (2610042O14Rik), mRNA      |
| Up at 6 hrs | A_65_P06050 | 1.25 | 0.012 |             |               | Intronic in U013963                                                |
| Up at 6 hrs | A_65_P13153 | 1.25 | 0.027 | BC024899.1  | Eif5a         | eukaryotic translation initiation factor 5a                        |
| Up at 6 hrs | A_65_P05727 | 1.25 | 0.044 | XM_132471.1 | 1110015K06Rik | hypothetical ARM repeat structure containing protein               |
| Up at 6 hrs | A_65_P06031 | 1.25 | 0.037 | BC015245.1  | Slc6a6        | Mus musculus solute carrier family 6 (neurotransmitter transporte  |
| Up at 6 hrs | A_65_P06344 | 1.25 | 0.021 | XM_133949.1 | Echs1         | HYPOTHETICAL 31.3 KDA PROTEIN (FRAGMENT). [Source:SPTREMBL;Acc:Q9  |
| Up at 6 hrs | A_65_P06542 | 1.25 | 0.012 | NM_019766.1 | Tebp-pending  | Mus musculus telomerase binding protein, p23 (Tebp-pending), mRNA  |
| Up at 6 hrs | A_65_P07485 | 1.25 | 0.005 | NM_010699.1 | Ldh1          | Mus musculus lactate dehydrogenase 3, C chain, sperm specific (Ld  |
| Up at 6 hrs | A_65_P03977 | 1.25 | 0.016 | NM_145391.1 | LOC213233     | Mus musculus similar to hypothetical protein FLJ10143 (LOC213233)  |
| Up at 6 hrs | A_65_P09762 | 1.25 | 0.049 |             | A1317223      | UNKNOWN                                                            |
| Up at 6 hrs | A_65_P11217 | 1.25 | 0.016 | NM_025791.1 | 0610006I08Rik | Mus musculus RIKEN cDNA 0610006I08 gene (0610006I08Rik), mRNA      |
| Up at 6 hrs | A_65_P02943 | 1.25 | 0.050 | AF237774.1  | Parva         | Mus musculus parvin, alpha (Parva), mRNA                           |
| Up at 6 hrs | A_65_P19597 | 1.25 | 0.002 | XM_130895.1 | A630006E05    | Intronic in U003268                                                |
| Up at 6 hrs | A_65_P07099 | 1.25 | 0.003 | NM_145138.1 | Nek9          | Mus musculus NIMA-related kinase Nek9 (Nek9), mRNA                 |
| Up at 6 hrs | A_65_P09066 | 1.25 | 0.015 | BC028667.1  | Ube2j2        | Mus musculus ubiquitin conjugating enzyme 6 (Ubc6p-pending), mRNA  |
| Up at 6 hrs | A_65_P09711 | 1.25 | 0.001 | BC008112.1  | 1810005H09Rik | Mus musculus RIKEN cDNA 1810005H09 gene (1810005H09Rik), mRNA      |
| Up at 6 hrs | A_65_P02412 | 1.25 | 0.023 | NM_011150.1 | Ppicap        | Mus musculus peptidylprolyl isomerase C-associated protein (Ppicap |
| Up at 6 hrs | A_65_P03938 | 1.25 | 0.045 | XM_147240.1 | Cln2          | Mus musculus chloride channel 2 (Cln2), mRNA                       |
| Up at 6 hrs | A_65_P07728 | 1.24 | 0.033 | XM_131815.1 | Mcrs1         | Mus musculus microspherule protein 1 (Mcrs1), mRNA                 |
| Up at 6 hrs | A_65_P04242 | 1.24 | 0.040 | XM_131843.2 | E030019A03    | DJ126A5.1.2 (NOVEL DNAJ DOMAIN PROTEIN) (ISOFORM 2) (FRAGMENT) ho  |
| Up at 6 hrs | A_65_P10696 | 1.24 | 0.028 | NM_009359.1 | Tex9          | Mus musculus testis expressed gene 9 (Tex9), mRNA                  |
| Up at 6 hrs | A_65_P00719 | 1.24 | 0.039 | NM_023205.1 | 2010003O02Rik | Mus musculus similar to NADH-ubiquinone oxidoreductase B17 subuni  |
| Up at 6 hrs | A_65_P08608 | 1.24 | 0.035 | XM_126511.1 | 2310012I15Rik | hypothetical K+ channel tetramerisation domain containing protein  |
| Up at 6 hrs | A_65_P01313 | 1.24 | 0.003 | BC029754.1  | Cs            | Mus musculus citrate synthase (Cs), mRNA                           |
| Up at 6 hrs | A_65_P05829 | 1.24 | 0.013 |             |               | UNKNOWN                                                            |
| Up at 6 hrs | A_65_P08131 | 1.24 | 0.041 | NM_026515.1 | 2810417H13Rik | Mus musculus RIKEN cDNA 2810417H13 gene (2810417H13Rik), mRNA      |
| Up at 6 hrs | A_65_P08167 | 1.24 | 0.050 | XM_133764.2 | C330016G14    | RANBP7/IMPORTIN 7. [Source:SPTREMBL;Acc:Q9EPL8]                    |
| Up at 6 hrs | A_65_P05341 | 1.24 | 0.011 | XM_128634.1 | 1110003M08Rik | EMBRYONIC SEVEN-SPAN TRANSMEMBRANE PROTEIN-LIKE PROTEIN homolog    |
| Up at 6 hrs | A_65_P01302 | 1.24 | 0.000 |             |               | REPEAT-SEQUENCE                                                    |
| Up at 6 hrs | A_65_P08443 | 1.24 | 0.004 | XM_123938.1 | Eif2s2        | Mus musculus eukaryotic translation initiation factor 2, subunit   |
| Up at 6 hrs | A_65_P07002 | 1.23 | 0.000 |             | A1504062      | UNKNOWN                                                            |
| Up at 6 hrs | A_65_P12780 | 1.23 | 0.043 |             |               | UNKNOWN                                                            |
| Up at 6 hrs | A_65_P10639 | 1.23 | 0.017 | AK009638.1  | 2310035N15Rik | hypothetical RING finger containing protein                        |
| Up at 6 hrs | A_65_P04860 | 1.23 | 0.033 |             |               | G-protein beta WD-40 repeats with Beige/BEACH domain containing p  |
| Up at 6 hrs | A_65_P08310 | 1.23 | 0.005 | XM_130214.2 | Nmi           | N-MYC-INTERACTOR (NMI) (N-MYC AND STAT INTERACTOR). [Source:SWISS  |

|             |             |      |       |               |               |                                                                   |
|-------------|-------------|------|-------|---------------|---------------|-------------------------------------------------------------------|
| Up at 6 hrs | A_65_P11186 | 1.23 | 0.049 | XM_131717.2   | Gale          | UDP GLUCOSE 4 EPIMERASE EC 5.1.3.2 GALACTOWALDENASE UDP GALACTOSE |
| Up at 6 hrs | A_65_P01623 | 1.23 | 0.004 | NM_026643.1   | 2410017P07Rik | Mus musculus RIKEN cDNA 2410017P07 gene (2410017P07Rik), mRNA     |
| Up at 6 hrs | A_65_P02017 | 1.23 | 0.015 | NM_008622.1   | Mpv17         | Mus musculus Mpv17 transgene, kidney disease mutant (Mpv17), mRNA |
| Up at 6 hrs | A_65_P03292 | 1.23 | 0.008 | NM_026752.1   | 1110013H04Rik | Mus musculus RIKEN cDNA 1110013H04 gene (1110013H04Rik), mRNA     |
| Up at 6 hrs | A_65_P03044 | 1.23 | 0.042 | BC035209.1    | Ppfbp1        | PTPRF interacting protein, binding protein 1 (liprin beta 1)      |
| Up at 6 hrs | A_65_P02447 | 1.22 | 0.030 | NM_025927.1   | Mprl45        | Mus musculus mitochondrial ribosomal protein L45 (Mprl45), mRNA   |
| Up at 6 hrs | A_65_P06904 | 1.22 | 0.009 | NM_023647.1   | 3830408P04Rik | Mus musculus RIKEN cDNA 3830408P04 gene (3830408P04Rik), mRNA     |
| Up at 6 hrs | A_65_P13715 | 1.22 | 0.033 |               | D2Erd616e     | UNKNOWN                                                           |
| Up at 6 hrs | A_65_P01405 | 1.22 | 0.019 | NM_138607.1   | D0HXS9928E    | Mus musculus DNA segment, human DXS9928E (D0HXS9928E), mRNA       |
| Up at 6 hrs | A_65_P02289 | 1.22 | 0.042 | XM_125982.2   | Ogdh          | oxoglutarate dehydrogenase (lipoamide) (EC 1.2.4.2) E1 component  |
| Up at 6 hrs | A_65_P06269 | 1.22 | 0.044 |               |               | UNKNOWN                                                           |
| Up at 6 hrs | A_65_P06654 | 1.22 | 0.015 | NM_025605.1   | 2400001E08Rik | Mus musculus RIKEN cDNA 2400001E08 gene (2400001E08Rik), mRNA     |
| Up at 6 hrs | A_65_P05139 | 1.22 | 0.019 | BC006760.1    | Ykt6-pending  | Mus musculus prenylated SNARE protein (Ykt6-pending), mRNA        |
| Up at 6 hrs | A_65_P06342 | 1.22 | 0.027 | BC015839.1    | AW536160      | CALDESMON                                                         |
| Up at 6 hrs | A_65_P00537 | 1.22 | 0.001 | NM_008654.1   | Myd116        | Mus musculus myeloid differentiation primary response gene 116 (M |
| Up at 6 hrs | A_65_P02647 | 1.22 | 0.000 | NM_024227.2   | Mprl28        | Mus musculus RIKEN cDNA 1110015G04 gene (1110015G04Rik), mRNA     |
| Up at 6 hrs | A_65_P10732 | 1.22 | 0.011 | AF465519.1    | Tagln2        | TRANSGELIN 2. [Source:SWISSPROT;Acc:Q9WVA4]                       |
| Up at 6 hrs | A_65_P17999 | 1.22 | 0.020 |               |               | Similar to: Mus musculus 13 days embryo lung cDNA, RIKEN full-len |
| Up at 6 hrs | A_65_P02256 | 1.22 | 0.012 | NM_013053.1   | Ywhaq         | Mus musculus tyrosine 3-monoxygenase/tryptophan 5-monoxygenase    |
| Up at 6 hrs | A_65_P02925 | 1.22 | 0.004 | 6330516O20Rik |               | TRIPARTITE MOTIF PROTEIN TRIM23 (FRAGMENT). [Source:SPTREMBL;Acc: |
| Up at 6 hrs | A_65_P12469 | 1.22 | 0.023 | XM_135044.1   | Copb2         | COATOMER BETA SUBUNIT (BETA-COAT PROTEIN) (BETA-COP) (P102). [Sou |
| Up at 6 hrs | A_65_P03070 | 1.21 | 0.026 | XM_126743.1   | P4hb          | PROTEIN DISULFIDE ISOMERASE PRECURSOR (PDI) (EC 5.3.4.1) (PROLYL  |
| Up at 6 hrs | A_65_P10597 | 1.21 | 0.011 | NM_012003.1   | Cops7a        | Mus musculus COP9 (constitutive photomorphogenic) homolog, subuni |
| Up at 6 hrs | A_65_P17945 | 1.21 | 0.042 | NM_146131.1   | MGC38361      | Mus musculus hypothetical protein MGC38361 (MGC38361), mRNA       |
| Up at 6 hrs | A_65_P06993 | 1.21 | 0.014 | XM_134872.2   | 4932434F09Rik | DIPEPTIDYL PEPTIDASE                                              |
| Up at 6 hrs | A_65_P06456 | 1.21 | 0.001 | NM_133676.1   | Osgep         | Mus musculus O-sialoglycoprotein endopeptidase (Osgep), mRNA      |
| Up at 6 hrs | A_65_P01005 | 1.21 | 0.010 | NM_006380.2   | Al465480      | Mus musculus RIKEN cDNA 1300003O07 gene (1300003O07Rik), mRNA     |
| Up at 6 hrs | A_65_P06517 | 1.21 | 0.026 | AY082671.1    | Sec23a        | Mus musculus SEC23A (S. cerevisiae) (Sec23a), mRNA                |
| Up at 6 hrs | A_65_P07599 | 1.21 | 0.041 | NM_010162.1   | Ext1          | Mus musculus exostoses (multiple) 1 (Ext1), mRNA                  |
| Up at 6 hrs | A_65_P15558 | 1.21 | 0.003 | BC004688.1    | Nxn           | Mus musculus nucleoredoxin (Nxn), mRNA                            |
| Up at 6 hrs | A_65_P07217 | 1.21 | 0.032 |               | Dbt           | Mus musculus dihydroipoamide branched chain transacylase E2 (Dbt  |
| Up at 6 hrs | A_65_P10376 | 1.21 | 0.049 |               |               | Intronic in U027981                                               |
| Up at 6 hrs | A_65_P11079 | 1.21 | 0.022 |               |               | UNKNOWN                                                           |
| Up at 6 hrs | A_65_P04535 | 1.21 | 0.008 | NM_145476.1   | LOC223754     | Mus musculus similar to hypothetical protein FLJ20337 (LOC223754) |
| Up at 6 hrs | A_65_P08127 | 1.21 | 0.030 | NM_080665.1   | 1300006N24Rik | hypothetical Proline-rich region/RNA-binding region RNP-1 (RNA re |
| Up at 6 hrs | A_65_P08848 | 1.21 | 0.018 |               |               | UNKNOWN                                                           |
| Up at 6 hrs | A_65_P05706 | 1.21 | 0.000 | XM_134737.2   | MGC18837      | RAB3D, MEMBER RAS ONCOGENE FAMILY. [Source:RefSeq;Acc:NM_031874]  |
| Up at 6 hrs | A_65_P14468 | 1.20 | 0.014 | XM_149609.1   | Mad4          | Mus musculus Max dimerization protein 4 (Mad4), mRNA              |
| Up at 6 hrs | A_65_P01918 | 1.20 | 0.023 | NM_008859.1   | Prkcq         | Mus musculus protein kinase C, theta (Prkcq), mRNA                |
| Up at 6 hrs | A_65_P07954 | 1.20 | 0.021 | NM_146217.1   | Aars          | Mus musculus alanyl-tRNA synthetase (Aars), mRNA                  |
| Up at 6 hrs | A_65_P11622 | 1.20 | 0.023 | NM_026594.1   | 4930517K11Rik | Mus musculus RIKEN cDNA 4930517K11 gene (4930517K11Rik), mRNA     |
| Up at 6 hrs | A_65_P05788 | 1.20 | 0.014 | NM_133684.1   | 2810484M10Rik | Mus musculus RIKEN cDNA 2810484M10 gene (2810484M10Rik), mRNA     |
| Up at 6 hrs | A_65_P18404 | 1.20 | 0.007 | XM_128908.1   |               | PR DOMAIN ZINC FINGER PROTEIN 6 ISOFORM                           |
| Up at 6 hrs | A_65_P10187 | 1.20 | 0.030 | AC008972.8    | LOC238799     | IMPORTIN BETA 2 SUBUNIT KARYOPHERIN BETA 2 SUBUNIT TRANSPORTIN M9 |
| Up at 6 hrs | A_65_P00588 | 1.20 | 0.024 | XM_127488.2   |               | UNKNOWN                                                           |
| Up at 6 hrs | A_65_P08605 | 1.20 | 0.007 | NM_026432.1   | 1810045K07Rik | Mus musculus RIKEN cDNA 1810045K07 gene (1810045K07Rik), mRNA     |
| Up at 6 hrs | A_65_P07014 | 1.20 | 0.039 | NM_025707.1   | 4122402F11Rik | BTB/POZ domain containing protein                                 |
| Up at 6 hrs | A_65_P09365 | 1.20 | 0.033 | NM_025275.1   | X83328        | Mus musculus EST X83328 (X83328), mRNA                            |
| Up at 6 hrs | A_65_P11527 | 1.20 | 0.033 | NM_144870.1   | MGC37950      | Mus musculus hypothetical protein MGC37950 (MGC37950), mRNA       |
| Up at 6 hrs | A_65_P14907 | 1.20 | 0.046 |               |               | Intronic in U016208                                               |
| Up at 6 hrs | A_65_P03791 | 1.20 | 0.045 | XM_135983.1   | A430107J06Rik | RIKEN cDNA A430107J06 gene                                        |
| Up at 6 hrs | A_65_P08810 | 1.19 | 0.003 | BC034867.1    | Rdbp          | Mus musculus DNA segment, Chr 17, human D6S45 (D17H6S45), mRNA    |
| Up at 6 hrs | A_65_P04582 | 1.19 | 0.003 | XM_149495.2   | Kpna6         | Mus musculus karyopherin (importin) alpha 6 (Kpna6), mRNA         |
| Up at 6 hrs | A_65_P13601 | 1.19 | 0.005 | NM_153519.1   | Txndc2        | Mus musculus spermatid-specific thioredoxin 1 (Sptrx1), mRNA      |
| Up at 6 hrs | A_65_P17627 | 1.19 | 0.027 | AB073619.1    | 1110013B16Rik | Mus musculus RIKEN cDNA 1110013B16 gene (1110013B16Rik), mRNA     |
| Up at 6 hrs | A_65_P02973 | 1.19 | 0.021 | NM_148894.1   |               | ANNEXIN V BINDING PROTEIN ABP 10                                  |
| Up at 6 hrs | A_65_P07774 | 1.19 | 0.023 | NM_013859.1   | ORF6          | Mus musculus open reading frame 6 (ORF6), mRNA                    |
| Up at 6 hrs | A_65_P04461 | 1.19 | 0.040 | AK022869.1    |               | UNKNOWN                                                           |

|             |             |      |       |             |                |                                                                   |
|-------------|-------------|------|-------|-------------|----------------|-------------------------------------------------------------------|
| Up at 6 hrs | A_65_P08736 | 1.19 | 0.007 |             | Gna-rs1        | UNKNOWN                                                           |
| Up at 6 hrs | A_65_P03571 | 1.19 | 0.014 |             | Tuba3          | Mus musculus tubulin, alpha 3 (Tuba3), mRNA                       |
| Up at 6 hrs | A_65_P05438 | 1.19 | 0.024 | NM_009446.1 | Guk1           | Mus musculus guanylate kinase 1 (Guk1), mRNA                      |
| Up at 6 hrs | A_65_P09404 | 1.19 | 0.030 | BC024625.1  | D10Wsu52e      | Mus musculus DNA segment, Chr 10, Wayne State University 52, expr |
| Up at 6 hrs | A_65_P08194 | 1.19 | 0.042 | NM_133722.1 | 2210412D01Rik  | Mus musculus RIKEN cDNA 2210412D01 gene (2210412D01Rik), mRNA     |
| Up at 6 hrs | A_65_P12525 | 1.19 | 0.008 |             | AW146299       | IMPORTIN ALPHA SUBUNIT KARYOPHERIN ALPHA                          |
| Up at 6 hrs | A_65_P00644 | 1.18 | 0.020 | NM_130779.1 | Adcy3          | Mus musculus adenylate cyclase 3 (Adcy3), mRNA                    |
| Up at 6 hrs | A_65_P04055 | 1.18 | 0.019 |             | A1649155       | RAB14, member RAS oncogene family                                 |
| Up at 6 hrs | A_65_P10599 | 1.18 | 0.043 | AK014315.1  | Mynn           | Mus musculus myoneurin (Mynn), mRNA                               |
| Up at 6 hrs | A_65_P05953 | 1.18 | 0.021 | XM_134479.1 | 2400006P09Rik  | Similar to: Mus musculus RIKEN cDNA 2400006P09 gene (2400006P09Ri |
| Up at 6 hrs | A_65_P14274 | 1.18 | 0.045 | XM_127628.2 | 2300006C11Rik  | UBIQUITIN C-TERMINAL HYDROLASE X4. [Source:SPTREMBL;Acc:Q99PU7]   |
| Up at 6 hrs | A_65_P05284 | 1.18 | 0.028 | NM_030263.1 | BC003498       | Mus musculus cDNA sequence BC00398 (BC003498), mRNA               |
| Up at 6 hrs | A_65_P02568 | 1.18 | 0.040 | BC024579.1  |                | similar to MATCH TO CAB70657.1 (PID:G6807679) (FRAGMENT) [Homo sa |
| Up at 6 hrs | A_65_P04296 | 1.18 | 0.033 | NM_019709.1 | Mbtps1         | Mus musculus membrane-bound transcription factor protease, site 1 |
| Up at 6 hrs | A_65_P04755 | 1.18 | 0.014 |             |                | UNKNOWN                                                           |
| Up at 6 hrs | A_65_P09033 | 1.18 | 0.031 | NM_009671.2 | Ankhn          | REPEAT-SEQUENCE                                                   |
| Up at 6 hrs | A_65_P07133 | 1.17 | 0.047 | NM_130864.1 | Acaa           | UNKNOWN (PROTEIN FOR MGC:7090). [Source:SPTREMBL;Acc:Q921H8]      |
| Up at 6 hrs | A_65_P08034 | 1.17 | 0.003 | NM_023119.1 | Eno1           | UNKNOWN                                                           |
| Up at 6 hrs | A_65_P19656 | 1.17 | 0.001 | NM_023312.1 | Grim19-pending | Mus musculus genes associated with retinoid-IFN-induced mortality |
| Up at 6 hrs | A_65_P04611 | 1.17 | 0.015 | NM_016742.1 | Cdc37          | Mus musculus cell division cycle 37 homolog (S. cerevisiae) (Cdc3 |
| Up at 6 hrs | A_65_P08478 | 1.17 | 0.048 |             |                | UNKNOWN                                                           |
| Up at 6 hrs | A_65_P05497 | 1.17 | 0.030 | XM_135006.2 | 4932411M14     | SIMILAR TO MITOTIC CONTROL PROTEIN                                |
| Up at 6 hrs | A_65_P08963 | 1.17 | 0.014 |             |                | UNKNOWN                                                           |
| Up at 6 hrs | A_65_P15491 | 1.17 | 0.022 | NM_008686.1 | Nfe2l1         | UNKNOWN                                                           |
| Up at 6 hrs | A_65_P03267 | 1.17 | 0.021 | NM_010413.2 | Hdac6          | Mus musculus histone deacetylase 6 (Hdac6), mRNA                  |
| Up at 6 hrs | A_65_P01177 | 1.17 | 0.026 |             |                | UNKNOWN                                                           |
| Up at 6 hrs | A_65_P09719 | 1.17 | 0.027 | XM_178412.1 | 1110030L07Rik  | PROTEIN CGI                                                       |
| Up at 6 hrs | A_65_P01777 | 1.17 | 0.012 | NM_139063.1 | Muted          | Mus musculus muted (Muted), mRNA                                  |
| Up at 6 hrs | A_65_P06913 | 1.17 | 0.001 | BC011114.1  | Ndufa4         | NADH-UBIQUINONE OXIDOREDUCTASE MLRQ SUBUNIT (EC 1.6.5.3) (EC 1.6. |
| Up at 6 hrs | A_65_P00670 | 1.17 | 0.044 | NM_019924.1 | Rps6ka4        | Mus musculus ribosomal protein S6 kinase, 90kD, polypeptide 4 (Rp |
| Up at 6 hrs | A_65_P06586 | 1.17 | 0.040 | NM_133682.1 | 9130012G04Rik  | Mus musculus RIKEN cDNA 9130012G04 gene (9130012G04Rik), mRNA     |
| Up at 6 hrs | A_65_P01644 | 1.16 | 0.046 | BC021532.1  | 4632419K20Rik  | HYPOTHETICAL 107.1 KDA PROTEIN homolog [Homo sapiens]             |
| Up at 6 hrs | A_65_P04640 | 1.16 | 0.048 | NM_008019.1 | Fkbp1a         | Mus musculus FK506 binding protein 1a (12 kDa) (Fkbp1a), mRNA     |
| Up at 6 hrs | A_65_P10379 | 1.16 | 0.034 | NM_138315.1 | MGC38321       | Mus musculus CasL interacting molecule MICAL (MGC38321), mRNA     |
| Up at 6 hrs | A_65_P03209 | 1.16 | 0.022 | AK011179.1  | D17Wsu76e      | Mus musculus Pbx/knotted 1 homeobox (Pknx1), mRNA                 |
| Up at 6 hrs | A_65_P05546 | 1.16 | 0.001 | BC034845.1  | 1110066L09Rik  | Mus musculus RIKEN cDNA 1110066L09 gene (1110066L09Rik), mRNA     |
| Up at 6 hrs | A_65_P08444 | 1.16 | 0.014 | XM_128280.1 | D430005B17     | DJ52614.2 (KIAA0153 (SIMILAR TO WORM D2013.9)) (KIAA0153 PROTEIN  |
| Up at 6 hrs | A_65_P05256 | 1.16 | 0.014 | NM_029352.1 | Dusp9          | Mus musculus RIKEN cDNA 2310076D10 gene (2310076D10Rik), mRNA     |
| Up at 6 hrs | A_65_P06571 | 1.16 | 0.044 | XM_129778.1 | Map4k4         | Mus musculus mitogen-activated protein kinase kinase kinase kinas |
| Up at 6 hrs | A_65_P11610 | 1.16 | 0.015 | BC024096.1  | 1810022F11Rik  | Mus musculus RIKEN cDNA 1810022F11 gene (1810022F11Rik), mRNA     |
| Up at 6 hrs | A_65_P03297 | 1.16 | 0.036 | NM_011288.1 | Mrpl23         | Mus musculus mitochondrial ribosomal protein L23 (Mrpl23), mRNA   |
| Up at 6 hrs | A_65_P05453 | 1.16 | 0.023 | NM_016682.1 | Uble1b         | UNKNOWN                                                           |
| Up at 6 hrs | A_65_P07945 | 1.16 | 0.046 | NM_024206.1 | 1110003H02Rik  | Mus musculus RIKEN cDNA 1110003H02 gene (1110003H02Rik), mRNA     |
| Up at 6 hrs | A_65_P09090 | 1.16 | 0.036 | BC037504.1  | Arih2          | Mus musculus ariadne homolog 2 (Drosophila) (Arih2), mRNA         |
| Up at 6 hrs | A_65_P09510 | 1.16 | 0.039 | NM_028751.2 | 0610041D19Rik  | REPEAT-SEQUENCE                                                   |
| Up at 6 hrs | A_65_P10974 | 1.16 | 0.027 | XM_129470.2 | Nav1           | hypothetical AAA ATPase superfamily containing protein            |
| Up at 6 hrs | A_65_P11414 | 1.16 | 0.003 |             |                | ALPHA 1,4 N ACETYLGALACTOSAMINYLTRANSFERASE/ALPHA 1 ,4            |
| Up at 6 hrs | A_65_P05110 | 1.16 | 0.004 |             | Pip5k2a        | Mus musculus phosphatidylinositol-4-phosphate 5-kinase, type II,  |
| Up at 6 hrs | A_65_P08236 | 1.16 | 0.014 | BC023190.1  | Acp6           | Mus musculus acid phosphatase 6, lysophosphatidic (Acp6), mRNA    |
| Up at 6 hrs | A_65_P04576 | 1.16 | 0.045 | NM_145502.1 | LOC226144      | Mus musculus hypothetical protein BC011220 (LOC226144), mRNA      |
| Up at 6 hrs | A_65_P00754 | 1.16 | 0.007 | NM_011518.1 | Syk            | Mus musculus spleen tyrosine kinase (Syk), mRNA                   |
| Up at 6 hrs | A_65_P04375 | 1.15 | 0.024 | AF480435.1  |                | weakly similar to SQUAMOUS CELL CARCINOMA ANTIGEN RECOGNIZED BY T |
| Up at 6 hrs | A_65_P02218 | 1.15 | 0.027 | BC016077.1  | 1110032C13Rik  | Mus musculus RIKEN cDNA 1110032C13 gene (1110032C13Rik), mRNA     |
| Up at 6 hrs | A_65_P09213 | 1.15 | 0.046 | XM_125656.2 | 1700056O17Rik  | Mus musculus RIKEN cDNA 1700056O17 gene (1700056O17Rik), mRNA     |
| Up at 6 hrs | A_65_P09638 | 1.15 | 0.046 | BC003433.1  | Eef2k          | Mus musculus eukaryotic elongation factor-2 kinase (Eef2k), mRNA  |
| Up at 6 hrs | A_65_P10127 | 1.15 | 0.013 | NM_172285.1 | LOC234779      | 1 PHOSPHATIDYLYNOSITOL 4,5 BISPHTHATE PHOSPHODIESTERASE DELTA 1   |
| Up at 6 hrs | A_65_P14185 | 1.15 | 0.011 | NM_022884.1 | Bhmt2          | UNKNOWN                                                           |
| Up at 6 hrs | A_65_P05955 | 1.15 | 0.030 | NM_016752.1 | Ugal2          | Mus musculus UDP-galactose translocator 2 (Ugal2), mRNA           |

|             |             |      |       |             |                 |                                                                   |
|-------------|-------------|------|-------|-------------|-----------------|-------------------------------------------------------------------|
| Up at 6 hrs | A_65_P06399 | 1.15 | 0.050 | NM_008150.1 | Gpc4            | Mus musculus glypican 4 (Gpc4), mRNA                              |
| Up at 6 hrs | A_65_P07897 | 1.15 | 0.023 |             | Fzd4            | Mus musculus frizzled homolog 4 (Drosophila) (Fzd4), mRNA         |
| Up at 6 hrs | A_65_P04757 | 1.14 | 0.041 | NM_078477.1 | Klf16           | Mus musculus Kruppel-like factor 16 (Klf16), mRNA                 |
| Up at 6 hrs | A_65_P02645 | 1.14 | 0.015 |             |                 | Intronic in U024878                                               |
| Up at 6 hrs | A_65_P01396 | 1.14 | 0.028 |             | Stam            | Mus musculus signal transducing adaptor molecule (SH3 domain and  |
| Up at 6 hrs | A_65_P05974 | 1.14 | 0.023 | NM_019553.1 | Ddx21           | Mus musculus DEAD/H (Asp-Glu-Ala-Asp/His) box polypeptide 21 (RNA |
| Up at 6 hrs | A_65_P06489 | 1.14 | 0.031 | XM_130703.2 | A1481105        | Mus musculus similar to ZK1067.2.p [Caenorhabditis elegans] (LOC2 |
| Up at 6 hrs | A_65_P18760 | 1.14 | 0.019 | NM_009722.1 | Atp2a2          | Mus musculus ATPase, Ca++ transporting, cardiac muscle, slow twit |
| Up at 6 hrs | A_65_P07010 | 1.13 | 0.016 | BC005454.1  | Aco1            | IRON-RESPONSIVE ELEMENT BINDING PROTEIN 1 (IRE-BP 1) (IRON REGULA |
| Up at 6 hrs | A_65_P00640 | 1.13 | 0.002 |             |                 | Similar to: Mus musculus adult male eyeball cDNA, RIKEN full-leng |
| Up at 6 hrs | A_65_P07151 | 1.13 | 0.038 | XM_130533.1 |                 | Mus musculus similar to RIKEN cDNA 5830498C14 [Mus musculus] (LOC |
| Up at 6 hrs | A_65_P00889 | 1.13 | 0.030 |             | 3732413A17Rik   | Mus musculus RIKEN cDNA 3732413A17 gene (3732413A17Rik), mRNA     |
| Up at 6 hrs | A_65_P02214 | 1.13 | 0.005 | XM_128178.2 | 2610510E10Rik   | weakly similar to NOVEL MEMBER OF SERINE-ARGININE DOMAIN PROTEIN, |
| Up at 6 hrs | A_65_P11932 | 1.13 | 0.010 | NM_013935.1 | Ptpla           | Mus musculus protein tyrosine phosphatase-like (proline instead o |
| Up at 6 hrs | A_65_P04599 | 1.13 | 0.047 | BC019373.1  | Lyp1a3          | Mus musculus lysophospholipase 3 (Lyp1a3), mRNA                   |
| Up at 6 hrs | A_65_P02882 | 1.13 | 0.009 | BC017125.1  | Erp29           | Mus musculus endoplasmic reticulum protein 29 (Erp29), mRNA       |
| Up at 6 hrs | A_65_P03494 | 1.13 | 0.010 | NM_138587.1 | D6Wsu176e       | Mus musculus DNA segment, Chr 6, Wayne State University 176, expr |
| Up at 6 hrs | A_65_P04100 | 1.12 | 0.023 | NM_007838.1 | Ddost           | Mus musculus dolichyl-di-phosphooligosaccharide-protein glycotran |
| Up at 6 hrs | A_65_P01537 | 1.12 | 0.039 | NM_027432.2 | 2610312E17Rik   | Mus musculus RIKEN cDNA 2610312E17 gene (2610312E17Rik), mRNA     |
| Up at 6 hrs | A_65_P05182 | 1.12 | 0.013 | XM_130877.1 | LOC229363       | GMP SYNTHASE [GLUTAMINE HYDROLYZING] EC 6.3.5.2 GLUTAMINE AMIDOTR |
| Up at 6 hrs | A_65_P06436 | 1.12 | 0.013 | NM_172545.1 | 9230102N17Rik   | similar to CDNA FLJ12879 FIS, CLONE NT2RP2003857, WEAKLY SIMILAR  |
| Up at 6 hrs | A_65_P11035 | 1.12 | 0.003 |             |                 | Intronic in U033251                                               |
| Up at 6 hrs | A_65_P06141 | 1.12 | 0.019 | NM_029406.1 | 1110061L23Rik   | Mus musculus RIKEN cDNA 1110061L23 gene (1110061L23Rik), mRNA     |
| Up at 6 hrs | A_65_P09330 | 1.12 | 0.015 | U10102.1    | Bcl2l           | Mus musculus Bcl2-like (Bcl2l), mRNA                              |
| Up at 6 hrs | A_65_P09583 | 1.12 | 0.008 | NM_172926.1 | B830022K16      | SORTING NEXIN                                                     |
| Up at 6 hrs | A_65_P05481 | 1.12 | 0.012 | NM_009795.1 | Capns1          | Mus musculus calpain, small subunit 1 (Capns1), mRNA              |
| Up at 6 hrs | A_65_P08422 | 1.11 | 0.018 | NM_130885.1 | Oxr1            | Mus musculus oxidation resistance 1 (Oxr1), mRNA                  |
| Up at 6 hrs | A_65_P14084 | 1.11 | 0.047 | NM_009088.1 | Rpo1-4          | Mus musculus RNA polymerase 1-4 (194 kDa subunit) (Rpo1-4), mRNA  |
| Up at 6 hrs | A_65_P01336 | 1.11 | 0.043 |             |                 | Intronic in U038363                                               |
| Up at 6 hrs | A_65_P10718 | 1.11 | 0.037 | XM_176890.1 | 1110018F06Rik   | OXYSTEROL BINDING PROTEIN                                         |
| Up at 6 hrs | A_65_P17636 | 1.11 | 0.013 |             |                 | Intronic in U002585                                               |
| Up at 6 hrs | A_65_P07866 | 1.11 | 0.004 | XM_134888.1 | 2010321M09Rik   | hypothetical Integrin A (or I) domain structure containing protei |
| Up at 6 hrs | A_65_P09585 | 1.10 | 0.031 | BC013551.1  | Dscr1           | Mus musculus Down syndrome critical region homolog 1 (human) (Dsc |
| Up at 6 hrs | A_65_P06750 | 1.10 | 0.014 | BC024706.1  | Gabarapl1       | Mus musculus gamma-aminobutyric acid (GABA(A)) receptor-associate |
| Up at 6 hrs | A_65_P02356 | 1.10 | 0.015 | BC025800.1  | Sema4a          | Mus musculus sema domain, immunoglobulin domain (Ig), transmembra |
| Up at 6 hrs | A_65_P06685 | 1.10 | 0.020 | XM_129949.1 | 0710007A14Rik   | similar to PROTEIN PHOSPHATASE 2C [Rattus norvegicus]             |
| Up at 6 hrs | A_65_P12718 | 1.10 | 0.009 | NM_027862.1 | 0610009D10Rik   | Mus musculus RIKEN cDNA 0610009D10 gene (0610009D10Rik), mRNA     |
| Up at 6 hrs | A_65_P08690 | 1.10 | 0.045 | XM_134166.1 | AW558465        | OVARC1001768 PROTEIN homolog [Homo sapiens]                       |
| Up at 6 hrs | A_65_P06737 | 1.10 | 0.005 | NM_133763.1 | 6430706C13Rik   | Mus musculus RIKEN cDNA 6430706C13 gene (6430706C13Rik), mRNA     |
| Up at 6 hrs | A_65_P13692 | 1.10 | 0.010 | NM_026468.1 | Atp5g2          | ATP SYNTHASE LIPID-BINDING PROTEIN, MITOCHONDRIAL PRECURSOR (EC 3 |
| Up at 6 hrs | A_65_P00759 | 1.09 | 0.045 |             |                 | Intronic in U003993                                               |
| Up at 6 hrs | A_65_P06843 | 1.09 | 0.008 | XM_131106.2 | St1l            | Mus musculus suppression of tumorigenicity 7-like (St1l), mRNA    |
| Up at 6 hrs | A_65_P02572 | 1.09 | 0.043 | XM_110791.1 | Smcy            | Similar to: Mus musculus selected mouse cDNA on the Y (Smcy), mRN |
| Up at 6 hrs | A_65_P07077 | 1.09 | 0.029 | NM_009632.1 | Adprt12         | Mus musculus ADP-ribosyltransferase (NAD+; poly(ADP-ribose) polym |
| Up at 6 hrs | A_65_P09060 | 1.09 | 0.029 | NM_007460.1 | Ap3d            | Mus musculus adaptor-related protein complex AP-3, delta subunit  |
| Up at 6 hrs | A_65_P18831 | 1.09 | 0.037 |             |                 | UNKNOWN                                                           |
| Up at 6 hrs | A_65_P04729 | 1.09 | 0.028 | NM_026395.1 | 1110060F11Rik   | UNKNOWN                                                           |
| Up at 6 hrs | A_65_P01583 | 1.09 | 0.031 | XM_133192.2 | 1810008O21Rik   | CDNA FLJ20512 FIS, CLONE KAT09739 homolog [Homo sapiens]          |
| Up at 6 hrs | A_65_P12353 | 1.09 | 0.016 |             |                 | UNKNOWN                                                           |
| Up at 6 hrs | A_65_P16290 | 1.09 | 0.039 |             |                 | Intronic in U037908                                               |
| Up at 6 hrs | A_65_P19348 | 1.08 | 0.001 | NM_026161.1 | 0710001E10Rik   | Mus musculus RIKEN cDNA 0710001E10 gene (0710001E10Rik), mRNA     |
| Up at 6 hrs | A_65_P07850 | 1.08 | 0.021 | NM_012030.1 | Slc9a3r1        | Mus musculus solute carrier family 9 (sodium/hydrogen exchanger), |
| Up at 6 hrs | A_65_P08661 | 1.08 | 0.003 | NM_011431.2 | Snrp116-pending | Mus musculus U5 small nuclear ribonucleoprotein 116 kDa (Snrp116- |
| Up at 6 hrs | A_65_P01614 | 1.08 | 0.006 | NM_008323.1 | ldh3g           | Mus musculus isocitrate dehydrogenase 3 (NAD+), gamma (ldh3g), mR |
| Up at 6 hrs | A_65_P04591 | 1.08 | 0.027 | XM_126415.1 | Poir2a          | Mus musculus polymerase (RNA) II (DNA directed) polypeptide A (Po |
| Up at 6 hrs | A_65_P14765 | 1.07 | 0.019 | NM_027127.1 | 2310016C16Rik   | UNKNOWN                                                           |
| Up at 6 hrs | A_65_P06844 | 1.07 | 0.033 | BC007183.1  | Ampd3           | Mus musculus AMP deaminase 3 (Ampd3), mRNA                        |
| Up at 6 hrs | A_65_P01827 | 1.07 | 0.009 | AK012795.1  | Rad18           | Mus musculus RAD18 homolog (S. cerevisiae) (Rad18), mRNA          |

|               |             |      |       |             |               |                                                                   |
|---------------|-------------|------|-------|-------------|---------------|-------------------------------------------------------------------|
| Up at 6 hrs   | A_65_P10106 | 1.07 | 0.050 | NM_148926.1 | Tex27         | Mus musculus testis expressed gene 27 (Tex27), mRNA               |
| Up at 6 hrs   | A_65_P01591 | 1.07 | 0.034 | NM_011519.1 | Sdc1          | UNKNOWN                                                           |
| Up at 6 hrs   | A_65_P13521 | 1.07 | 0.010 | BC019613.1  | Recql5        | Mus musculus RecQ protein-like 5 (Recql5), mRNA                   |
| Up at 6 hrs   | A_65_P09225 | 1.06 | 0.045 | XM_125949.1 | LOC211389     | SULFITE OXIDASE, MITOCHONDRIAL PRECURSOR EC 1.8.3.-               |
| Up at 6 hrs   | A_65_P05923 | 1.06 | 0.028 | M26251.1    |               | UNKNOWN                                                           |
| Up at 6 hrs   | A_65_P18172 | 1.06 | 0.019 |             |               | UNKNOWN                                                           |
| Up at 6 hrs   | A_65_P20363 | 1.05 | 0.006 |             | 8430408C20Rik | T-cell expressing clone j6                                        |
| Up at 6 hrs   | A_65_P07899 | 1.05 | 0.032 | XM_129425.2 | A1647518      | NUCLEAR UBIQUITOUS CASEIN AND CYCLIN DEPENDENT KINASES            |
| Up at 6 hrs   | A_65_P13796 | 1.05 | 0.033 | NM_011701.1 | Vim           | Mus musculus vimentin (Vim), mRNA                                 |
| Up at 6 hrs   | A_65_P20088 | 1.03 | 0.023 |             |               | Intronic in U036052                                               |
| Up at 6 hrs   | A_65_P12871 | 1.03 | 0.042 | XM_149231.1 |               | 10, 11 DAYS EMBRYO CDNA, RIKEN FULL-LENGTH ENRICHED LIBRARY, CLON |
| Up at 6 hrs   | A_65_P13778 | 1.03 | 0.025 | NM_023794.2 | Etv5          | ETS-RELATED TRANSCRIPTION FACTOR. [Source:RefSeq;Acc:NM_023794]   |
| Up at 6 hrs   | A_65_P00890 | 1.02 | 0.015 | XM_134057.1 | 1110063C11Rik | RING FINGER PROTEIN                                               |
| Down at 6 hrs | A_65_P03154 | 0.98 | 0.027 | BC023936.1  | Kif3a         | UNKNOWN                                                           |
| Down at 6 hrs | A_65_P02244 | 0.97 | 0.019 |             |               | UNKNOWN                                                           |
| Down at 6 hrs | A_65_P16419 | 0.96 | 0.049 | NM_030180.1 | 4930429G18Rik | Mus musculus RIKEN cDNA 4930429G18 gene (4930429G18Rik), mRNA     |
| Down at 6 hrs | A_65_P11638 | 0.96 | 0.036 | NM_007599.1 | Capg          | Mus musculus capping protein (actin filament), gelsolin-like (Cap |
| Down at 6 hrs | A_65_P14486 | 0.95 | 0.037 |             | AA408705      | Intronic in U025867                                               |
| Down at 6 hrs | A_65_P03550 | 0.95 | 0.038 | NM_145705.2 | D14Wsu146e    | Mus musculus DNA segment, Chr 14, Wayne State University 146, exp |
| Down at 6 hrs | A_65_P20384 | 0.95 | 0.037 | NM_145433.1 | LOC217038     | Mus musculus similar to hypothetical protein FLJ22578 (LOC217038) |
| Down at 6 hrs | A_65_P16785 | 0.95 | 0.005 | NM_133795.1 | 4833412C19Rik | Mus musculus RIKEN cDNA 4833412C19 gene (4833412C19Rik), mRNA     |
| Down at 6 hrs | A_65_P11690 | 0.94 | 0.011 |             |               | UNKNOWN                                                           |
| Down at 6 hrs | A_65_P03325 | 0.94 | 0.032 | XM_128515.2 | Axin          | AXIN 1 (AXIS INHIBITION PROTEIN 1) (FUSED PROTEIN) (FRAGMENT), [S |
| Down at 6 hrs | A_65_P09622 | 0.94 | 0.017 | AK020440.1  | 9430025M21Rik | Intronic in U021380                                               |
| Down at 6 hrs | A_65_P16494 | 0.94 | 0.028 | NM_011503.1 | Stxbp2        | Mus musculus syntaxin binding protein 2 (Stxbp2), mRNA            |
| Down at 6 hrs | A_65_P17597 | 0.94 | 0.042 | XM_129143.1 | 2700038E08Rik | similar to CDNA: FLJ22347 FIS, CLONE HRC06188 [Homo sapiens]      |
| Down at 6 hrs | A_65_P07158 | 0.94 | 0.025 | NM_145824.1 | 4432417N03Rik | Mus musculus RIKEN cDNA 4432417N03 gene (4432417N03Rik), mRNA     |
| Down at 6 hrs | A_65_P15721 | 0.94 | 0.048 |             |               | Intronic in U012493                                               |
| Down at 6 hrs | A_65_P16356 | 0.94 | 0.007 |             | MGC25655      | TRANSCRIPTIONAL REPRESSOR PROTEIN YY1 YIN AND YANG 1 YY1 DELTA T  |
| Down at 6 hrs | A_65_P09974 | 0.93 | 0.012 | NM_138304.1 | Calm4         | Mus musculus calmodulin-like 4 (Calm4), mRNA                      |
| Down at 6 hrs | A_65_P14089 | 0.93 | 0.044 | XM_133733.2 | 4930502N04Rik | weakly similar to UBIQUITIN CARBOXYL-TERMINAL HYDROLASE 64E (EC 3 |
| Down at 6 hrs | A_65_P15652 | 0.93 | 0.006 | XM_180130.1 |               | HYPOTHETICAL PROTEIN MGC11596. [Source:SWISSPROT;Acc:Q923D4]      |
| Down at 6 hrs | A_65_P16501 | 0.93 | 0.005 | NM_007761.1 | Crcp          | Mus musculus calcitonin gene-related peptide-receptor component p |
| Down at 6 hrs | A_65_P12389 | 0.93 | 0.027 | XM_144135.2 | 1110033A15Rik | ATROPHIN 1 DENTATORUBRAL PALLIDOLUYSIAN ATROPHY                   |
| Down at 6 hrs | A_65_P10589 | 0.93 | 0.049 |             | Acox3         | acyl-Coenzyme A oxidase 3, pristanoyl                             |
| Down at 6 hrs | A_65_P09656 | 0.93 | 0.017 |             |               | UNKNOWN                                                           |
| Down at 6 hrs | A_65_P12449 | 0.93 | 0.041 | NM_017480.1 | Icos          | Mus musculus inducible T-cell co-stimulator (Icos), mRNA          |
| Down at 6 hrs | A_65_P13093 | 0.92 | 0.020 | NM_019519.1 | Rabggta       | Mus musculus Rab geranylgeranyl transferase, a subunit (Rabggta), |
| Down at 6 hrs | A_65_P17785 | 0.92 | 0.009 | BC034517.1  | Ercc2         | Mus musculus excision repair cross-complementing rodent repair de |
| Down at 6 hrs | A_65_P11158 | 0.92 | 0.035 | NM_010811.1 | Ndst2         | Mus musculus N-deacetylase/N-sulfotransferase (heparan glucosamin |
| Down at 6 hrs | A_65_P14253 | 0.92 | 0.038 | NM_026538.1 | D11Ert619e    | Mus musculus DNA segment, Chr 11, ERATO Doi 619, expressed (D11Er |
| Down at 6 hrs | A_65_P19107 | 0.92 | 0.033 |             |               | UNKNOWN                                                           |
| Down at 6 hrs | A_65_P14171 | 0.92 | 0.017 |             | A1848576      | Similar to: Rattus norvegicus similar to beta-interferon-induced  |
| Down at 6 hrs | A_65_P07204 | 0.92 | 0.018 | XM_150125.1 | Zfp319        | Mus musculus zinc finger protein 319 (Zfp319), mRNA               |
| Down at 6 hrs | A_65_P12207 | 0.92 | 0.041 | XM_128955.1 | Gpnl2         | GRPE PROTEIN HOMOLOG 2, MITOCHONDRIAL PRECURSOR (MT-GRPE          |
| Down at 6 hrs | A_65_P14118 | 0.92 | 0.047 | XM_131696.2 | LOC230767     | Similar to: Mus musculus, clone MGC:28034 IMAGE:3665627, mRNA, co |
| Down at 6 hrs | A_65_P18999 | 0.92 | 0.014 | NM_009097.1 | Rps6ka1       | Mus musculus ribosomal protein S6 kinase polypeptide 1 (Rps6ka1), |
| Down at 6 hrs | A_65_P11420 | 0.92 | 0.010 | XM_128223.2 | Hdac10        | HISTONE DEACETYLASE                                               |
| Down at 6 hrs | A_65_P12010 | 0.92 | 0.049 | NM_010585.2 | Itpr1         | UNKNOWN                                                           |
| Down at 6 hrs | A_65_P05536 | 0.91 | 0.015 | BC027676.1  | Mrpl43        | Mus musculus mitochondrial ribosomal protein L43 (Mrpl43), mRNA   |
| Down at 6 hrs | A_65_P17842 | 0.91 | 0.042 | NM_008997.1 | Rab11b        | Mus musculus RAB11B, member RAS oncogene family (Rab11b), mRNA    |
| Down at 6 hrs | A_65_P11668 | 0.91 | 0.000 | J03754.1    | PMCA          | Similar to: Rat plasma membrane Ca2+ ATPase-isoform 2 mRNA, compl |
| Down at 6 hrs | A_65_P19447 | 0.91 | 0.006 | BC019775.1  | Prelp         | REPEAT-SEQUENCE                                                   |
| Down at 6 hrs | A_65_P07260 | 0.91 | 0.026 | XM_149673.2 | 2310024K08Rik | Mus musculus RIKEN cDNA 2310024K08 gene (2310024K08Rik), mRNA     |
| Down at 6 hrs | A_65_P14970 | 0.91 | 0.004 | XM_134926.2 |               | UNKNOWN                                                           |
| Down at 6 hrs | A_65_P18220 | 0.91 | 0.033 |             |               | UNKNOWN                                                           |
| Down at 6 hrs | A_65_P08064 | 0.91 | 0.031 | NM_010113.1 | Egf           | Mus musculus epidermal growth factor (Egf), mRNA                  |
| Down at 6 hrs | A_65_P16702 | 0.91 | 0.021 |             |               | UNKNOWN                                                           |

|               |             |      |       |             |                 |                                                                   |
|---------------|-------------|------|-------|-------------|-----------------|-------------------------------------------------------------------|
| Down at 6 hrs | A_65_P05885 | 0.91 | 0.020 | XM_127563.1 | 5430433B02Rik   | hypothetical BTB/POZ domain/K+ channel tetramerisation domain con |
| Down at 6 hrs | A_65_P11985 | 0.91 | 0.017 | XM_148578.2 | AF506821        | Mus musculus hypothetical protein AF506821 (AF506821), mRNA       |
| Down at 6 hrs | A_65_P08068 | 0.90 | 0.031 | NM_011699.1 | Lin7c           | Mus musculus expressed sequence AU019331 (AU019331), mRNA         |
| Down at 6 hrs | A_65_P12859 | 0.90 | 0.023 |             | Slc16a1         | Mus musculus solute carrier family 16 (monocarboxylic acid transp |
| Down at 6 hrs | A_65_P17106 | 0.90 | 0.014 | NM_023625.1 | 1300012G16Rik   | Mus musculus RIKEN cDNA 1300012G16 gene (1300012G16Rik), mRNA     |
| Down at 6 hrs | A_65_P04286 | 0.90 | 0.003 |             | N4wbp5a-pending | NEDD4 WW DOMAIN-BINDING PROTEIN 5A homolog [Mus musculus]         |
| Down at 6 hrs | A_65_P05144 | 0.90 | 0.041 | XM_126303.1 | Ulk2            | Mus musculus Unc-51 like kinase 2 (C. elegans) (Ulk2), mRNA       |
| Down at 6 hrs | A_65_P13252 | 0.90 | 0.019 |             |                 | UNKNOWN                                                           |
| Down at 6 hrs | A_65_P17228 | 0.90 | 0.023 | Z31362.1    | Npn3            | Mus musculus RIKEN cDNA 1700127B04 gene (1700127B04Rik), mRNA     |
| Down at 6 hrs | A_65_P17772 | 0.90 | 0.025 | NM_007621.1 | Cbr2            | Mus musculus carbonyl reductase 2 (Cbr2), mRNA                    |
| Down at 6 hrs | A_65_P11753 | 0.90 | 0.035 | AB002376.2  |                 | UNKNOWN                                                           |
| Down at 6 hrs | A_65_P14562 | 0.90 | 0.043 | NM_028521.1 | 1700048E23Rik   | Mus musculus RIKEN cDNA 1700048E23 gene (1700048E23Rik), mRNA     |
| Down at 6 hrs | A_65_P13086 | 0.90 | 0.015 |             | MGC28646        | UNKNOWN                                                           |
| Down at 6 hrs | A_65_P14148 | 0.90 | 0.015 |             | D9Erdt60e       | UNKNOWN                                                           |
| Down at 6 hrs | A_65_P14803 | 0.90 | 0.018 | BC023754.1  |                 | UNKNOWN                                                           |
| Down at 6 hrs | A_65_P15181 | 0.90 | 0.012 | NM_026512.1 | 2010012D11Rik   | similar to aromatic ester hydrolase (EC 3.1.1.-) [Homo sapiens]   |
| Down at 6 hrs | A_65_P12622 | 0.90 | 0.015 |             | D9Erdt241e      | UNKNOWN                                                           |
| Down at 6 hrs | A_65_P10534 | 0.90 | 0.038 | NM_133928.1 | 2810014D17Rik   | Mus musculus RIKEN cDNA 2410012P20 gene (2410012P20Rik), mRNA     |
| Down at 6 hrs | A_65_P18901 | 0.90 | 0.017 | XM_124968.1 | Stx1b2          | Mus musculus syntaxin 1B2 (Stx1b2), mRNA                          |
| Down at 6 hrs | A_65_P19486 | 0.90 | 0.033 | NM_133734.1 | 0710008A13Rik   | Mus musculus RIKEN cDNA 0710008A13 gene (0710008A13Rik), mRNA     |
| Down at 6 hrs | A_65_P12633 | 0.90 | 0.029 | NM_027857.1 | 0610006H10Rik   | Mus musculus RIKEN cDNA 0610006H10 gene (0610006H10Rik), mRNA     |
| Down at 6 hrs | A_65_P18894 | 0.90 | 0.035 |             | AI849128        | UNKNOWN                                                           |
| Down at 6 hrs | A_65_P19692 | 0.90 | 0.032 | NM_008515.1 | Lrrfp1          | REPEAT-SEQUENCE                                                   |
| Down at 6 hrs | A_65_P20018 | 0.90 | 0.048 | XM_127335.1 | C85886          | hypothetical Ribosomal protein S2 containing protein              |
| Down at 6 hrs | A_65_P03092 | 0.90 | 0.012 | XM_127612.2 | Ppp3cb          | SERINE/THREONINE PROTEIN PHOSPHATASE 2B CATALYTIC SUBUNIT, BETA I |
| Down at 6 hrs | A_65_P12225 | 0.89 | 0.023 | NM_009442.1 | Ttf1            | Mus musculus transcription termination factor 1 (Ttf1), mRNA      |
| Down at 6 hrs | A_65_P12242 | 0.89 | 0.028 |             |                 | UNKNOWN                                                           |
| Down at 6 hrs | A_65_P12262 | 0.89 | 0.008 |             |                 | UNKNOWN                                                           |
| Down at 6 hrs | A_65_P12412 | 0.89 | 0.025 |             |                 | REPEAT-SEQUENCE                                                   |
| Down at 6 hrs | A_65_P16220 | 0.89 | 0.007 | XM_133452.2 | Prrg2           | Mus musculus proline-rich Gla (G-carboxyglutamic acid) polypeptid |
| Down at 6 hrs | A_65_P11499 | 0.89 | 0.035 | NM_010229.1 | Flt3            | Mus musculus FMS-like tyrosine kinase 3 (Flt3), mRNA              |
| Down at 6 hrs | A_65_P15528 | 0.89 | 0.009 |             | Gria4           | Mus musculus glutamate receptor, ionotropic, AMPA4 (alpha 4) (Gri |
| Down at 6 hrs | A_65_P15252 | 0.89 | 0.035 |             |                 | Intronic in U017062                                               |
| Down at 6 hrs | A_65_P18503 | 0.89 | 0.009 | NM_024480.1 | BC003251        | Mus musculus cDNA sequence BC003251 (BC003251), mRNA              |
| Down at 6 hrs | A_65_P12011 | 0.89 | 0.030 | NM_021962.1 | ABR             | BREAKPOINT CLUSTER REGION                                         |
| Down at 6 hrs | A_65_P12894 | 0.89 | 0.011 | NM_146259.1 | BC030314        | Mus musculus cDNA sequence BC030314 (BC030314), mRNA              |
| Down at 6 hrs | A_65_P17793 | 0.89 | 0.008 | XM_110108.1 | Tcp1            | Mus musculus t-complex protein 1 (Tcp1), mRNA                     |
| Down at 6 hrs | A_65_P10158 | 0.89 | 0.046 | XM_148263.1 | LOC224129       | ADENYLATE CYCLASE, TYPE EC 4.6.1.1 ATP PYROPHOSPHATE LYASE ADENYL |
| Down at 6 hrs | A_65_P19351 | 0.89 | 0.009 | NM_146198.1 | MGC25910        | Mus musculus RIKEN cDNA 2010013B02 gene (MGC25910), mRNA          |
| Down at 6 hrs | A_65_P11084 | 0.89 | 0.020 | NM_008865.1 | Csh2            | Mus musculus chorionic somatomammotropin hormone 2 (Csh2), mRNA   |
| Down at 6 hrs | A_65_P11633 | 0.89 | 0.007 | NM_026557.1 | 6720407C15Rik   | Mus musculus RIKEN cDNA 6720407C15 gene (6720407C15Rik), mRNA     |
| Down at 6 hrs | A_65_P11836 | 0.89 | 0.046 | AK010436.1  | 2410007B07Rik   | Similar to: Mus musculus ES cells cDNA, RIKEN full-length enrich  |
| Down at 6 hrs | A_65_P16190 | 0.89 | 0.008 |             |                 | Intronic in U034651                                               |
| Down at 6 hrs | A_65_P10032 | 0.89 | 0.004 | BC026966.1  | 1200008O12Rik   | SIMILAR TO RIKEN CDNA O12                                         |
| Down at 6 hrs | A_65_P20143 | 0.89 | 0.019 | NM_028044.1 | Cnn3            | Mus musculus calponin 3, acidic (Cnn3), mRNA                      |
| Down at 6 hrs | A_65_P19876 | 0.89 | 0.006 |             |                 | UNKNOWN                                                           |
| Down at 6 hrs | A_65_P09803 | 0.88 | 0.022 |             |                 | UNKNOWN                                                           |
| Down at 6 hrs | A_65_P12535 | 0.88 | 0.011 | BC010215.1  | Plekha2         | Mus musculus pleckstrin homology domain-containing, family A (pho |
| Down at 6 hrs | A_65_P12649 | 0.88 | 0.025 |             |                 | Intronic in U005488                                               |
| Down at 6 hrs | A_65_P13228 | 0.88 | 0.021 | NM_028220.2 | 3010002112Rik   | Mus musculus RIKEN cDNA 3010002112 gene (3010002112Rik), mRNA     |
| Down at 6 hrs | A_65_P19428 | 0.88 | 0.043 |             | AW227605        | Mus musculus expressed sequence AI594717 (AI594717), mRNA         |
| Down at 6 hrs | A_65_P12511 | 0.88 | 0.020 | NM_027274.1 | 2810025M15Rik   | Mus musculus RIKEN cDNA 2810025M15 gene (2810025M15Rik), mRNA     |
| Down at 6 hrs | A_65_P14404 | 0.88 | 0.037 |             |                 | UNKNOWN                                                           |
| Down at 6 hrs | A_65_P19178 | 0.88 | 0.021 | NM_027818.1 | 9030416H16Rik   | Mus musculus RIKEN cDNA 9030416H16 gene (9030416H16Rik), mRNA     |
| Down at 6 hrs | A_65_P19806 | 0.88 | 0.007 | NM_023132.1 | Renbp           | Mus musculus renin binding protein (Renbp), mRNA                  |
| Down at 6 hrs | A_65_P20052 | 0.88 | 0.021 | NM_139101.1 | AU045404        | UNKNOWN                                                           |
| Down at 6 hrs | A_65_P05490 | 0.88 | 0.019 | NM_031159.1 | Apobec1         | Mus musculus apolipoprotein B editing complex 1 (Apobec1), mRNA   |
| Down at 6 hrs | A_65_P06118 | 0.88 | 0.024 | XM_125605.2 | 2700019D07Rik   | hypothetical Zinc finger, C2H2 type containing protein            |





|               |             |      |       |             |               |                                                                   |
|---------------|-------------|------|-------|-------------|---------------|-------------------------------------------------------------------|
| Down at 6 hrs | A_65_P14304 | 0.86 | 0.019 | NM_026672.1 | 0610005A07Rik | Mus musculus RIKEN cDNA 0610005A07 gene (0610005A07Rik), mRNA     |
| Down at 6 hrs | A_65_P04471 | 0.86 | 0.038 |             | AI314760      | Intronic in U043677                                               |
| Down at 6 hrs | A_65_P12235 | 0.86 | 0.040 |             |               | UNKNOWN                                                           |
| Down at 6 hrs | A_65_P13267 | 0.86 | 0.019 |             |               | UNKNOWN                                                           |
| Down at 6 hrs | A_65_P20515 | 0.86 | 0.009 | XM_124679.1 | AA407930      | Mus musculus expressed sequence AA407930 (AA407930), mRNA         |
| Down at 6 hrs | A_65_P20618 | 0.86 | 0.004 | XM_149599.2 |               | ACTIN BINDING LIM PROTEIN                                         |
| Down at 6 hrs | A_65_P11920 | 0.86 | 0.041 | AK011139.1  | 2600001M11Rik | Mus musculus 10 days embryo whole body cDNA, RIKEN full-length en |
| Down at 6 hrs | A_65_P14420 | 0.86 | 0.020 |             |               | UNKNOWN                                                           |
| Down at 6 hrs | A_65_P13925 | 0.86 | 0.042 |             | Gcnt2         | Mus musculus RIKEN cDNA 5330430K10 gene (5330430K10Rik), mRNA     |
| Down at 6 hrs | A_65_P16531 | 0.86 | 0.031 | NM_023537.2 | Rab3b         | Mus musculus RAB3B, member RAS oncogene family (Rab3b), mRNA      |
| Down at 6 hrs | A_65_P07973 | 0.86 | 0.019 | NM_030715.1 | Polh          | Mus musculus polymerase (DNA directed), eta (RAD 30 related) (Pol |
| Down at 6 hrs | A_65_P11970 | 0.86 | 0.004 |             |               | UNKNOWN                                                           |
| Down at 6 hrs | A_65_P13733 | 0.86 | 0.039 |             |               | Intronic in U023532                                               |
| Down at 6 hrs | A_65_P14311 | 0.86 | 0.023 | BC034053.1  | Bmp4          | Mus musculus bone morphogenetic protein 4 (Bmp4), mRNA            |
| Down at 6 hrs | A_65_P19953 | 0.86 | 0.042 | BC013056.1  | Atp6v0a2      | T-cell expressing clone j6                                        |
| Down at 6 hrs | A_65_P15865 | 0.86 | 0.007 |             |               | UNKNOWN                                                           |
| Down at 6 hrs | A_65_P11228 | 0.86 | 0.028 |             |               | UNKNOWN                                                           |
| Down at 6 hrs | A_65_P12080 | 0.86 | 0.008 | XM_134580.1 |               | Similar to: Mus musculus similar to transcriptional factor [Leuco |
| Down at 6 hrs | A_65_P14227 | 0.86 | 0.026 |             | C86933        | UNKNOWN                                                           |
| Down at 6 hrs | A_65_P19868 | 0.86 | 0.006 |             |               | Intronic in U025194                                               |
| Down at 6 hrs | A_65_P20413 | 0.86 | 0.023 |             |               | UNKNOWN                                                           |
| Down at 6 hrs | A_65_P20542 | 0.86 | 0.000 |             |               | UNKNOWN                                                           |
| Down at 6 hrs | A_65_P10757 | 0.86 | 0.028 | Z97989.1    |               | UNKNOWN                                                           |
| Down at 6 hrs | A_65_P14031 | 0.85 | 0.003 | NM_008028.1 | Flot2         | Mus musculus flotillin 2 (Flot2), mRNA                            |
| Down at 6 hrs | A_65_P11736 | 0.85 | 0.024 |             |               | UNKNOWN                                                           |
| Down at 6 hrs | A_65_P12042 | 0.85 | 0.006 | AF131817.1  | Cbfa2t1h      | Intronic in U004087                                               |
| Down at 6 hrs | A_65_P13684 | 0.85 | 0.050 | XM_132392.1 |               | SPLICING FACTOR, ARGININE/SERINE RICH 8 SUPPRESSOR OF WHITE APRIC |
| Down at 6 hrs | A_65_P07906 | 0.85 | 0.031 | NM_133185.1 | 0610011C19Rik | Mus musculus RIKEN cDNA 0610011C19 gene (0610011C19Rik), mRNA     |
| Down at 6 hrs | A_65_P14217 | 0.85 | 0.047 | NM_027213.1 | 1500012F11Rik | Mus musculus RIKEN cDNA 1500012F11 gene (1500012F11Rik), mRNA     |
| Down at 6 hrs | A_65_P09338 | 0.85 | 0.031 | NM_028082.1 | Cnot2         | Mus musculus CCR4-NOT transcription complex, subunit 2 (Cnot2), m |
| Down at 6 hrs | A_65_P11772 | 0.85 | 0.047 |             | D8ErtD54e     | Intronic in U042932                                               |
| Down at 6 hrs | A_65_P12553 | 0.85 | 0.025 |             | D10ErtD276e   | Intronic in U031708                                               |
| Down at 6 hrs | A_65_P17874 | 0.85 | 0.027 | BC038283.1  | D11Bwg1310e   | PROTEIN HOMOLOG, MITOCHONDRIAL                                    |
| Down at 6 hrs | A_65_P20167 | 0.85 | 0.014 |             |               | UNKNOWN                                                           |
| Down at 6 hrs | A_65_P10745 | 0.85 | 0.010 |             |               | UNKNOWN                                                           |
| Down at 6 hrs | A_65_P17584 | 0.85 | 0.000 |             |               | UNKNOWN                                                           |
| Down at 6 hrs | A_65_P20267 | 0.85 | 0.044 |             |               | UNKNOWN                                                           |
| Down at 6 hrs | A_65_P04650 | 0.85 | 0.034 | XM_131333.1 |               | Mus musculus LOC212377 (LOC212377), mRNA                          |
| Down at 6 hrs | A_65_P11246 | 0.85 | 0.010 |             |               | UNKNOWN                                                           |
| Down at 6 hrs | A_65_P15433 | 0.85 | 0.000 | XM_127767.2 | Mrpl52        | mitochondrial ribosomal protein L52                               |
| Down at 6 hrs | A_65_P11605 | 0.85 | 0.003 |             |               | Intronic in U027252                                               |
| Down at 6 hrs | A_65_P16758 | 0.85 | 0.040 |             |               | UNKNOWN                                                           |
| Down at 6 hrs | A_65_P18110 | 0.85 | 0.046 | NM_008416.1 | Junb          | Mus musculus Jun-B oncogene (Junb), mRNA                          |
| Down at 6 hrs | A_65_P18485 | 0.85 | 0.048 | NM_009238.1 | Sox4          | Mus musculus SRY-box containing gene 4 (Sox4), mRNA               |
| Down at 6 hrs | A_65_P18617 | 0.85 | 0.024 |             |               | Mus musculus RIKEN cDNA 0610038K03 gene (0610038K03Rik), mRNA     |
| Down at 6 hrs | A_65_P18152 | 0.84 | 0.019 |             | KIAA0978      | similar to bA358N2.1 (KIAA0978) (Homo sapiens)                    |
| Down at 6 hrs | A_65_P18249 | 0.84 | 0.032 | XM_131906.2 | D230038D11Rik | HYPOTHETICAL 64.2 KDA PROTEIN homolog [Homo sapiens]              |
| Down at 6 hrs | A_65_P12953 | 0.84 | 0.014 | NM_026655.2 | 2310057M21Rik | Mus musculus RIKEN cDNA 2310057M21 gene (2310057M21Rik), mRNA     |
| Down at 6 hrs | A_65_P14300 | 0.84 | 0.041 |             |               | UNKNOWN                                                           |
| Down at 6 hrs | A_65_P17717 | 0.84 | 0.015 |             |               | Intronic in U021506                                               |
| Down at 6 hrs | A_65_P20431 | 0.84 | 0.024 | NM_026669.2 | 5031406P05Rik | Mus musculus RIKEN cDNA 5031406P05 gene (5031406P05Rik), mRNA     |
| Down at 6 hrs | A_65_P20663 | 0.84 | 0.044 |             |               | Intronic in U027680                                               |
| Down at 6 hrs | A_65_P10011 | 0.84 | 0.047 | XM_177143.1 | Mcf2l         | GUANINE NUCLEOTIDE EXCHANGE FACTOR DBS (DBLS BIG SISTER) (MCF2 TR |
| Down at 6 hrs | A_65_P11445 | 0.84 | 0.014 | BC003736.1  | Bet3-pending  | Mus musculus Bet3 homolog (S. cerevisiae) (Bet3-pending), mRNA    |
| Down at 6 hrs | A_65_P17055 | 0.84 | 0.030 | XM_134529.2 |               | FH1/FH2 DOMAINS CONTAINING PROTEIN FORMIN HOMOLOG OVEREXPRESSED I |
| Down at 6 hrs | A_65_P04035 | 0.84 | 0.020 | BC010309.1  | Plaur         | Mus musculus urokinase plasminogen activator receptor (Plaur), mR |
| Down at 6 hrs | A_65_P13755 | 0.84 | 0.044 |             |               | UNKNOWN                                                           |
| Down at 6 hrs | A_65_P17769 | 0.84 | 0.035 | NM_153554.1 | Pycs          | Mus musculus pyrroline-5-carboxylate synthetase (glutamate gamma- |

|               |             |      |       |             |               |                                                                                  |
|---------------|-------------|------|-------|-------------|---------------|----------------------------------------------------------------------------------|
| Down at 6 hrs | A_65_P19761 | 0.84 | 0.028 | NM_054093.1 | Ube3b         | Mus musculus ubiquitin protein ligase E3B (Ube3b), mRNA                          |
| Down at 6 hrs | A_65_P20352 | 0.84 | 0.019 | NM_029211.1 | 4930544L10Rik | UNKNOWN                                                                          |
| Down at 6 hrs | A_65_P20567 | 0.84 | 0.041 | NM_008860.1 | Prkcz         | Mus musculus protein kinase C, zeta (Prkcz), mRNA                                |
| Down at 6 hrs | A_65_P03555 | 0.84 | 0.012 | NM_007456.1 | Ap1m1         | Mus musculus adaptor-related protein complex AP-1, mu subunit 1 (REPEAT-SEQUENCE |
| Down at 6 hrs | A_65_P11281 | 0.84 | 0.035 |             |               |                                                                                  |
| Down at 6 hrs | A_65_P16000 | 0.84 | 0.045 |             | C77714        | Similar to: Mus musculus 0 day neonate cerebellum cDNA, RIKEN ful                |
| Down at 6 hrs | A_65_P20813 | 0.84 | 0.007 |             |               | UNKNOWN                                                                          |
| Down at 6 hrs | A_65_P08529 | 0.84 | 0.034 | XM_129976.1 | C79179        | UNKNOWN                                                                          |
| Down at 6 hrs | A_65_P13232 | 0.84 | 0.032 |             | D5Erttd159e   | UNKNOWN                                                                          |
| Down at 6 hrs | A_65_P13868 | 0.84 | 0.011 |             | CFTR/MRP      | Similar to: Mus musculus 12 days embryo spinal ganglion cDNA, RIK                |
| Down at 6 hrs | A_65_P18758 | 0.84 | 0.040 | NM_011014.1 | Oprs1         | Mus musculus opioid receptor, sigma 1 (Oprs1), mRNA                              |
| Down at 6 hrs | A_65_P20545 | 0.84 | 0.022 | BC031445.1  | Golph3        | Mus musculus golgi phosphoprotein 3 (Golph3), mRNA                               |
| Down at 6 hrs | A_65_P04014 | 0.84 | 0.015 | BC034650.1  | AF155546      | Mus musculus cDNA sequence AF155546 (AF155546), mRNA                             |
| Down at 6 hrs | A_65_P12599 | 0.84 | 0.029 | NM_010291.1 | Gjb5          | Mus musculus gap junction membrane channel protein beta 5 (Gjb5),                |
| Down at 6 hrs | A_65_P17114 | 0.84 | 0.022 |             |               | Intronic in U016618                                                              |
| Down at 6 hrs | A_65_P17576 | 0.84 | 0.006 | NM_033079.1 | D6Mm5e        | Mus musculus DNA segment, Chr 6, Miriam Meisler 5, expressed (D6M                |
| Down at 6 hrs | A_65_P19212 | 0.84 | 0.015 |             |               | UNKNOWN                                                                          |
| Down at 6 hrs | A_65_P04499 | 0.84 | 0.045 | NM_026866.1 | Disp1-pending | Mus musculus dispatched homolog 1 (Drosophila) (Disp1-pending), m                |
| Down at 6 hrs | A_65_P10778 | 0.84 | 0.034 | BC031826.1  | 2900024N03Rik | Mus musculus, clone IMAGE:4010355, mRNA                                          |
| Down at 6 hrs | A_65_P19664 | 0.84 | 0.025 |             |               | UNKNOWN                                                                          |
| Down at 6 hrs | A_65_P20170 | 0.84 | 0.025 |             |               | Intronic in U027658                                                              |
| Down at 6 hrs | A_65_P12656 | 0.84 | 0.034 | XM_178554.1 | LOC269796     | PROTEIN KINASE                                                                   |
| Down at 6 hrs | A_65_P14093 | 0.84 | 0.009 |             |               | REPEAT-SEQUENCE                                                                  |
| Down at 6 hrs | A_65_P19952 | 0.84 | 0.046 |             |               | Intronic in U025711                                                              |
| Down at 6 hrs | A_65_P20707 | 0.84 | 0.037 | NM_023372.1 | 0610025G13Rik | Mus musculus RIKEN cDNA 0610025G13 gene (0610025G13Rik), mRNA                    |
| Down at 6 hrs | A_65_P15336 | 0.84 | 0.008 |             |               | UNKNOWN                                                                          |
| Down at 6 hrs | A_65_P17797 | 0.84 | 0.016 |             |               | UNKNOWN                                                                          |
| Down at 6 hrs | A_65_P15985 | 0.83 | 0.023 |             |               | UNKNOWN                                                                          |
| Down at 6 hrs | A_65_P12522 | 0.83 | 0.012 |             |               | UNKNOWN                                                                          |
| Down at 6 hrs | A_65_P14473 | 0.83 | 0.003 |             | Nek4          | Mus musculus NIMA (never in mitosis gene a)-related expressed kin                |
| Down at 6 hrs | A_65_P12108 | 0.83 | 0.009 |             |               | Intronic in U032420                                                              |
| Down at 6 hrs | A_65_P19388 | 0.83 | 0.045 |             |               | UNKNOWN                                                                          |
| Down at 6 hrs | A_65_P08069 | 0.83 | 0.046 | NM_010465.1 | Hoxc6         | Intronic in U037686                                                              |
| Down at 6 hrs | A_65_P17015 | 0.83 | 0.027 |             | 4930544L10Rik | hypothetical RING finger containing protein                                      |
| Down at 6 hrs | A_65_P17305 | 0.83 | 0.026 |             |               | UNKNOWN                                                                          |
| Down at 6 hrs | A_65_P20510 | 0.83 | 0.013 |             |               | UNKNOWN                                                                          |
| Down at 6 hrs | A_65_P19236 | 0.83 | 0.032 | XM_128295.1 | LOC223921     | Mus musculus aladin (LOC223921), mRNA                                            |
| Down at 6 hrs | A_65_P08522 | 0.83 | 0.033 | NM_011273.1 | Xpr1          | Mus musculus xenotropic and polytropic retrovirus receptor 1 (Xpr                |
| Down at 6 hrs | A_65_P18587 | 0.83 | 0.021 |             | C80068        | Intronic in U014462                                                              |
| Down at 6 hrs | A_65_P19285 | 0.83 | 0.018 | NM_010169.2 | F2r           | Mus musculus coagulation factor II (thrombin) receptor (F2r), mRN                |
| Down at 6 hrs | A_65_P13819 | 0.83 | 0.048 |             | C80276        | UNKNOWN                                                                          |
| Down at 6 hrs | A_65_P16745 | 0.83 | 0.001 | BC026055.1  | Shmt1         | Mus musculus serine hydroxymethyl transferase 1 (soluble) (Shmt1)                |
| Down at 6 hrs | A_65_P17263 | 0.83 | 0.026 | NM_008131.1 | Glns          | Mus musculus glutamine synthetase (Glns), mRNA                                   |
| Down at 6 hrs | A_65_P17483 | 0.83 | 0.024 | BC035255.1  | 5430405G24Rik | Mus musculus, Similar to dentin sialophosphoprotein, clone IMAGE:                |
| Down at 6 hrs | A_65_P20202 | 0.83 | 0.030 | BC025538.1  | Xrcc4         | XRCC4 homolog [Mus musculus]                                                     |
| Down at 6 hrs | A_65_P20798 | 0.83 | 0.005 | XM_154346.1 |               | UNKNOWN                                                                          |
| Down at 6 hrs | A_65_P12053 | 0.83 | 0.014 |             |               | Intronic in U032804                                                              |
| Down at 6 hrs | A_65_P17410 | 0.83 | 0.009 |             | C6.1A-pending | UNKNOWN                                                                          |
| Down at 6 hrs | A_65_P17488 | 0.83 | 0.001 | NM_010798.1 | Mif           | Mus musculus macrophage migration inhibitory factor (Mif), mRNA                  |
| Down at 6 hrs | A_65_P17579 | 0.83 | 0.013 | NM_053158.1 | Mrpl1         | Mus musculus mitochondrial ribosomal protein L1 (Mrpl1), mRNA                    |
| Down at 6 hrs | A_65_P07166 | 0.83 | 0.016 | XM_133422.1 | Gtf2h1        | Mus musculus general transcription factor II H, polypeptide 1 (62                |
| Down at 6 hrs | A_65_P08720 | 0.83 | 0.050 | M22958.1    | Prlr          | Mouse prolactin receptor (PRLR1) mRNA, complete cds                              |
| Down at 6 hrs | A_65_P17541 | 0.83 | 0.008 |             |               | Intronic in U004693                                                              |
| Down at 6 hrs | A_65_P18484 | 0.83 | 0.010 |             |               | Intronic in U041319                                                              |
| Down at 6 hrs | A_65_P18934 | 0.83 | 0.018 | NM_025827.1 | 1300002A08Rik | Mus musculus RIKEN cDNA 1300002A08 gene (1300002A08Rik), mRNA                    |
| Down at 6 hrs | A_65_P05550 | 0.82 | 0.044 | NM_026623.1 | Cpsf5         | Mus musculus cleavage and polyadenylation specific factor 5, 25 k                |
| Down at 6 hrs | A_65_P18327 | 0.82 | 0.027 | XM_130734.2 | LOC228961     | AMINOPEPTIDASE                                                                   |
| Down at 6 hrs | A_65_P14640 | 0.82 | 0.036 | NM_172587.1 | 2810432N10Rik | TYROSINE PHOSPHATASE homolog [Homo sapiens]                                      |

|               |             |      |       |             |               |                                                                   |
|---------------|-------------|------|-------|-------------|---------------|-------------------------------------------------------------------|
| Down at 6 hrs | A_65_P15245 | 0.82 | 0.042 | AF022858.1  | Nrp2          | Intronic in U000361                                               |
| Down at 6 hrs | A_65_P20765 | 0.82 | 0.040 | NM_018828.1 | Fnbp4         | Mus musculus formin binding protein 4 (Fnbp4), mRNA               |
| Down at 6 hrs | A_65_P17290 | 0.82 | 0.023 | D85688.1    | Mc2r          | Mouse mRNA for adrenocorticotropin receptor, 5-untranslated regio |
| Down at 6 hrs | A_65_P17319 | 0.82 | 0.049 |             |               | UNKNOWN                                                           |
| Down at 6 hrs | A_65_P19670 | 0.82 | 0.014 |             |               | Intronic in U029995                                               |
| Down at 6 hrs | A_65_P12023 | 0.82 | 0.015 |             |               | KIAA1450 protein (Homo sapiens)                                   |
| Down at 6 hrs | A_65_P17706 | 0.82 | 0.050 | BC016267.1  |               | Similar to: Mus musculus, clone IMAGE:4924122, mRNA               |
| Down at 6 hrs | A_65_P13244 | 0.82 | 0.039 |             |               | UNKNOWN                                                           |
| Down at 6 hrs | A_65_P18145 | 0.82 | 0.034 | NM_023240.1 | Eef1d         | Mus musculus eukaryotic translation elongation factor 1 delta (gu |
| Down at 6 hrs | A_65_P14224 | 0.82 | 0.034 |             | C79744        | UNKNOWN                                                           |
| Down at 6 hrs | A_65_P18009 | 0.82 | 0.027 |             |               | UNKNOWN                                                           |
| Down at 6 hrs | A_65_P20054 | 0.82 | 0.025 | NM_009478.1 | Urod          | Mus musculus uroporphyrinogen decarboxylase (Urod), mRNA          |
| Down at 6 hrs | A_65_P20502 | 0.82 | 0.042 |             |               | Intronic in U041800                                               |
| Down at 6 hrs | A_65_P12615 | 0.82 | 0.041 |             |               | Intronic in U011986                                               |
| Down at 6 hrs | A_65_P13128 | 0.82 | 0.047 | BC011464.1  | Hsd17b7       | Mus musculus hydroxysteroid (17-beta) dehydrogenase 7 (Hsd17b7),  |
| Down at 6 hrs | A_65_P07417 | 0.82 | 0.046 |             | Mitc1         | Mus musculus MAD homolog 4 interacting transcription coactivator  |
| Down at 6 hrs | A_65_P11660 | 0.82 | 0.003 | NM_011854.1 | Oasl2         | Mus musculus 2-5 oligoadenylate synthetase-like 2 (Oasl2), mRNA   |
| Down at 6 hrs | A_65_P13029 | 0.82 | 0.000 |             |               | UNKNOWN                                                           |
| Down at 6 hrs | A_65_P09438 | 0.82 | 0.004 |             | Pax8          | paired box gene 8                                                 |
| Down at 6 hrs | A_65_P11458 | 0.82 | 0.033 | BC030401.1  | 6030426L16Rik | similar to HIPPOCALCIN-LIKE 1 [Mus musculus]                      |
| Down at 6 hrs | A_65_P12769 | 0.82 | 0.043 |             | Tor1b         | Mus musculus torsin family 1, member B (Tor1b), mRNA              |
| Down at 6 hrs | A_65_P05862 | 0.82 | 0.041 |             |               | UNKNOWN                                                           |
| Down at 6 hrs | A_65_P10736 | 0.82 | 0.017 |             |               | Intronic in U038091                                               |
| Down at 6 hrs | A_65_P11288 | 0.82 | 0.022 |             | 5730455P16Rik | PROTEIN NJMU-R1. [Source:SWISSPROT;Acc:Q9CYI0]                    |
| Down at 6 hrs | A_65_P18539 | 0.82 | 0.007 |             | 4932409F11Rik | Mus musculus RIKEN cDNA 4932409F11 gene (4932409F11Rik), mRNA     |
| Down at 6 hrs | A_65_P10291 | 0.81 | 0.015 |             |               | UNKNOWN                                                           |
| Down at 6 hrs | A_65_P12805 | 0.81 | 0.048 |             |               | UNKNOWN                                                           |
| Down at 6 hrs | A_65_P13319 | 0.81 | 0.010 | NM_028057.1 | 1500005G05Rik | NADH CYTOCHROME B5 REDUCTASE                                      |
| Down at 6 hrs | A_65_P13596 | 0.81 | 0.002 |             | Err1          | Intronic in U033544                                               |
| Down at 6 hrs | A_65_P11826 | 0.81 | 0.006 |             |               | Intronic in U033547                                               |
| Down at 6 hrs | A_65_P12229 | 0.81 | 0.012 |             |               | Intronic in U035759                                               |
| Down at 6 hrs | A_65_P12908 | 0.81 | 0.013 | NM_133250.1 | Mutyh         | Mus musculus mutY homolog (E. coli) (Mutyh), mRNA                 |
| Down at 6 hrs | A_65_P14054 | 0.81 | 0.029 | NM_021557.2 | Rdh11         | Mus musculus androgen-regulated short-chain dehydrogenase/reducta |
| Down at 6 hrs | A_65_P14641 | 0.81 | 0.034 | NM_172713.1 | 4931421J16    | HYPOTHETICAL 23.0 KDA PROTEIN (FRAGMENT). [Source:SPTREMBL;Acc:Q9 |
| Down at 6 hrs | A_65_P17892 | 0.81 | 0.014 |             | Catns         | Mus musculus catenin src (Catns), mRNA                            |
| Down at 6 hrs | A_65_P20069 | 0.81 | 0.005 |             | AU016353      | Mus musculus DNA segment, Chr 1, Pasteur Institute 1 (D1Pas1), mR |
| Down at 6 hrs | A_65_P11044 | 0.81 | 0.037 | D14909.1    | Adcyap1r1     | PITUITARY ADENYLATE CYCLASE ACTIVATING POLYPEPTIDE TYPE I RECEPTO |
| Down at 6 hrs | A_65_P11574 | 0.81 | 0.021 |             | C86896        | Intronic in U012766                                               |
| Down at 6 hrs | A_65_P13343 | 0.81 | 0.032 |             |               | UNKNOWN                                                           |
| Down at 6 hrs | A_65_P13540 | 0.81 | 0.020 |             |               | Intronic in U002359                                               |
| Down at 6 hrs | A_65_P19790 | 0.81 | 0.047 |             |               | Intronic in U003824                                               |
| Down at 6 hrs | A_65_P15890 | 0.81 | 0.011 |             | AU021018      | Mus musculus cDNA sequence BC028339 (BC028339), mRNA              |
| Down at 6 hrs | A_65_P18643 | 0.81 | 0.035 | BC019119.1  | Rpa1          | Mus musculus replication protein A1 (70 kDa) (Rpa1), mRNA         |
| Down at 6 hrs | A_65_P11665 | 0.81 | 0.019 | XM_139077.2 | Rnf17         | Mus musculus ring finger protein 17 (Rnf17), mRNA                 |
| Down at 6 hrs | A_65_P09064 | 0.81 | 0.045 | M73963.1    | Yy1           | UNKNOWN                                                           |
| Down at 6 hrs | A_65_P13348 | 0.81 | 0.036 | XM_176996.1 | 4833439O17Rik | LEUKOCYTE SURFACE                                                 |
| Down at 6 hrs | A_65_P15684 | 0.81 | 0.005 |             |               | UNKNOWN                                                           |
| Down at 6 hrs | A_65_P17875 | 0.81 | 0.043 |             |               | similar to DJ50O24.5.1 (NOVEL PROTEIN (TRANSLATION OF CDNA KAT072 |
| Down at 6 hrs | A_65_P20445 | 0.81 | 0.040 |             | Mgat5         | Mus musculus mannoside acetyl glucosaminyltransferase 5 (Mgat5),  |
| Down at 6 hrs | A_65_P19112 | 0.81 | 0.044 |             | Zfp397        | Mus musculus zinc finger protein 35 (Zfp35), mRNA                 |
| Down at 6 hrs | A_65_P19585 | 0.81 | 0.026 | NM_026043.1 | 2810441O16Rik | HYPOTHETICAL 29.5 KDA PROTEIN. [Source:SPTREMBL;Acc:Q91YJ1]       |
| Down at 6 hrs | A_65_P19877 | 0.81 | 0.036 |             |               | UNKNOWN                                                           |
| Down at 6 hrs | A_65_P12504 | 0.81 | 0.004 |             |               | Intronic in U015769                                               |
| Down at 6 hrs | A_65_P15226 | 0.81 | 0.048 |             | Pxmp4         | Mus musculus nuclear factor of activated T-cells 5 (Nfat5), mRNA  |
| Down at 6 hrs | A_65_P17677 | 0.81 | 0.016 |             | C87323        | Mus musculus expressed sequence AI788588 (AI788588), mRNA         |
| Down at 6 hrs | A_65_P05516 | 0.81 | 0.010 |             | AI661365      | Intronic in U042250                                               |
| Down at 6 hrs | A_65_P13511 | 0.81 | 0.047 |             |               | UNKNOWN                                                           |
| Down at 6 hrs | A_65_P16365 | 0.81 | 0.001 |             |               | UNKNOWN                                                           |

|               |             |      |       |             |               |                                                                   |
|---------------|-------------|------|-------|-------------|---------------|-------------------------------------------------------------------|
| Down at 6 hrs | A_65_P18556 | 0.81 | 0.013 | XM_125962.2 | Zfp278        | TRANSCRIPTION FACTOR MAZR. [Source:SPTREMBL;Acc:Q9JMG9]           |
| Down at 6 hrs | A_65_P11024 | 0.81 | 0.035 |             |               | Intronic in U001341                                               |
| Down at 6 hrs | A_65_P11912 | 0.81 | 0.018 | BC019730.1  | Bet1l         | Mus musculus blocked early in transport 1 homolog (S. cerevisiae) |
| Down at 6 hrs | A_65_P17202 | 0.81 | 0.044 | NM_080553.1 | Itpr3         | Mus musculus inositol 1,4,5-triphosphate receptor 3 (Itpr3), mRNA |
| Down at 6 hrs | A_65_P18628 | 0.81 | 0.023 |             |               | UNKNOWN                                                           |
| Down at 6 hrs | A_65_P19205 | 0.81 | 0.008 | XM_147640.1 |               | Mus musculus LOC209550 (LOC209550), mRNA                          |
| Down at 6 hrs | A_65_P19813 | 0.81 | 0.024 |             |               | REPEAT-SEQUENCE                                                   |
| Down at 6 hrs | A_65_P20332 | 0.81 | 0.014 | NM_021921.1 |               | UNKNOWN                                                           |
| Down at 6 hrs | A_65_P05703 | 0.80 | 0.041 |             |               | UNKNOWN                                                           |
| Down at 6 hrs | A_65_P19912 | 0.80 | 0.004 | NM_025835.1 | Pccb          | UNKNOWN                                                           |
| Down at 6 hrs | A_65_P20455 | 0.80 | 0.036 | XM_131100.1 | Ovgp1         | UNKNOWN                                                           |
| Down at 6 hrs | A_65_P11843 | 0.80 | 0.046 |             | AU014876      | Intronic in U036828                                               |
| Down at 6 hrs | A_65_P15496 | 0.80 | 0.044 |             | 0610038P07Rik | Mus musculus RIKEN cDNA 0610038P07 gene (0610038P07Rik), mRNA     |
| Down at 6 hrs | A_65_P19659 | 0.80 | 0.015 | XM_128511.1 | 0610011F06Rik | hypothetical S-adenosyl-L-methionine-dependent methyltransferases |
| Down at 6 hrs | A_65_P20453 | 0.80 | 0.014 |             |               | UNKNOWN                                                           |
| Down at 6 hrs | A_65_P16911 | 0.80 | 0.027 | XM_149692.1 |               | Similar to: Mus musculus similar to hypothetical protein FLJ20397 |
| Down at 6 hrs | A_65_P17059 | 0.80 | 0.043 | BC036801.1  | A1836003      | UNKNOWN                                                           |
| Down at 6 hrs | A_65_P17431 | 0.80 | 0.014 |             |               | UNKNOWN                                                           |
| Down at 6 hrs | A_65_P18928 | 0.80 | 0.046 | XM_126031.2 | AU018638      | HYPOTHETICAL 15.7 KDA PROTEIN (FRAGMENT). [Source:SPTREMBL;Acc:Q9 |
| Down at 6 hrs | A_65_P11829 | 0.80 | 0.006 |             | 4733401N12Rik | Mus musculus RIKEN cDNA 4733401N12 gene (4733401N12Rik), mRNA     |
| Down at 6 hrs | A_65_P13977 | 0.80 | 0.043 | BC014741.1  | Baz1b         | Mus musculus bromodomain adjacent to zinc finger domain, 1B (Baz1 |
| Down at 6 hrs | A_65_P13993 | 0.80 | 0.013 |             | C80865        | UNKNOWN                                                           |
| Down at 6 hrs | A_65_P19099 | 0.80 | 0.034 | NM_008968.1 | Ptgis         | Mus musculus prostaglandin I2 (prostacyclin) synthase (Ptgis), mR |
| Down at 6 hrs | A_65_P20138 | 0.80 | 0.011 |             |               | Intronic in U017296                                               |
| Down at 6 hrs | A_65_P11148 | 0.80 | 0.004 |             | A730042J05Rik | HT004 PROTEIN homolog [Homo sapiens]                              |
| Down at 6 hrs | A_65_P09146 | 0.80 | 0.022 | BC034194.1  | AW537966      | Mus musculus similar to Protein arginine N-methyltransferase (LOC |
| Down at 6 hrs | A_65_P10511 | 0.80 | 0.032 | NM_010336.1 | Edg2          | Mus musculus endothelial differentiation, lysophosphatidic acid G |
| Down at 6 hrs | A_65_P19596 | 0.80 | 0.029 | NM_007794.1 | Ctcf          | UNKNOWN                                                           |
| Down at 6 hrs | A_65_P08355 | 0.80 | 0.011 | XM_178462.1 | Clasp1        | CLIP-ASSOCIATING PROTEIN CLASP1 (FRAGMENT) homolog [Mus musculus] |
| Down at 6 hrs | A_65_P14454 | 0.80 | 0.007 | NM_172407.1 | 4921511116Rik | similar to PUTATIVE SERINE-RICH PROTEIN (FRAGMENT) [Homo sapiens] |
| Down at 6 hrs | A_65_P15699 | 0.80 | 0.008 | XM_139418.1 |               | ZINC FINGER PROTEIN                                               |
| Down at 6 hrs | A_65_P17865 | 0.80 | 0.000 |             |               | hypothetical Reprolysin family propeptide containing protein      |
| Down at 6 hrs | A_65_P19468 | 0.80 | 0.029 |             |               | Intronic in U025194                                               |
| Down at 6 hrs | A_65_P19766 | 0.80 | 0.000 |             |               | UNKNOWN                                                           |
| Down at 6 hrs | A_65_P20531 | 0.79 | 0.037 |             |               | Intronic in U033739                                               |
| Down at 6 hrs | A_65_P11639 | 0.79 | 0.015 |             |               | REPEAT-SEQUENCE                                                   |
| Down at 6 hrs | A_65_P12131 | 0.79 | 0.011 | NM_032006.1 | Mcola-pending | Mus musculus collagenase-like B (Mcolb-pending), mRNA             |
| Down at 6 hrs | A_65_P15062 | 0.79 | 0.043 | XM_130321.2 | 2610014F08Rik | hypothetical SAM domain (Sterile alpha motif)/Modified RING finge |
| Down at 6 hrs | A_65_P15282 | 0.79 | 0.048 | NM_028117.1 | 2600016L03Rik | Mus musculus RIKEN cDNA 2600016L03 gene (2600016L03Rik), mRNA     |
| Down at 6 hrs | A_65_P17895 | 0.79 | 0.031 | BC037056.1  | 2810403L02Rik | Mus musculus RIKEN cDNA 2810403L02 gene (2810403L02Rik), mRNA     |
| Down at 6 hrs | A_65_P19270 | 0.79 | 0.019 |             |               | Intronic in U011422                                               |
| Down at 6 hrs | A_65_P07814 | 0.79 | 0.050 |             | C81354        | UNKNOWN                                                           |
| Down at 6 hrs | A_65_P08625 | 0.79 | 0.030 |             |               | Intronic in U015808                                               |
| Down at 6 hrs | A_65_P19666 | 0.79 | 0.029 | XM_132063.1 | 1300013C10Rik | KELCH LIKE PROTEIN                                                |
| Down at 6 hrs | A_65_P09574 | 0.79 | 0.040 | AK003546.1  | Rsn           | Mus musculus restin (Reed-Steinberg cell-expressed intermediate f |
| Down at 6 hrs | A_65_P19088 | 0.79 | 0.021 | NM_148948.1 | Dicer1        | Mus musculus Dicer1, Dcr-1 homolog (Drosophila) (Dicer1), mRNA    |
| Down at 6 hrs | A_65_P14401 | 0.79 | 0.032 |             | 1810004N01Rik | Intronic in U003739                                               |
| Down at 6 hrs | A_65_P12817 | 0.79 | 0.002 | NM_172456.1 | 4732466J24    | ACTIVIN RECEPTOR TYPE IIB PRECURSOR (EC 2.7.1.37) (ACTR-IIB). [So |
| Down at 6 hrs | A_65_P14204 | 0.79 | 0.006 | XM_127914.1 | 4921505C17Rik | hypothetical ARM repeat structure containing protein              |
| Down at 6 hrs | A_65_P16526 | 0.79 | 0.037 | NM_144795.1 | MGC11688      | Mus musculus hypothetical protein MGC11688 (MGC11688), mRNA       |
| Down at 6 hrs | A_65_P04855 | 0.79 | 0.033 | NM_133728.1 | 2210409M21Rik | Mus musculus RIKEN cDNA 2210409M21 gene (2210409M21Rik), mRNA     |
| Down at 6 hrs | A_65_P19690 | 0.79 | 0.045 | NM_010656.1 | Sspn          | Mus musculus sarcospan (Sspn), mRNA                               |
| Down at 6 hrs | A_65_P12223 | 0.79 | 0.002 |             | Zfp68         | Mus musculus Zinc finger protein 68 (Zfp68), mRNA                 |
| Down at 6 hrs | A_65_P08055 | 0.79 | 0.006 | AK021390.1  | E130115I21Rik | Mus musculus helicase, lymphoid specific (Hells), mRNA            |
| Down at 6 hrs | A_65_P08874 | 0.79 | 0.041 | BC034442.1  | 2810405I11Rik | Mus musculus RIKEN cDNA 2810405I11 gene (2810405I11Rik), mRNA     |
| Down at 6 hrs | A_65_P14391 | 0.79 | 0.037 |             |               | UNKNOWN                                                           |
| Down at 6 hrs | A_65_P13793 | 0.78 | 0.048 |             |               | Intronic in U021129                                               |
| Down at 6 hrs | A_65_P14843 | 0.78 | 0.016 |             | A1316802      | UNKNOWN                                                           |

|               |             |      |       |             |               |                                                                      |
|---------------|-------------|------|-------|-------------|---------------|----------------------------------------------------------------------|
| Down at 6 hrs | A_65_P14854 | 0.78 | 0.001 |             |               | Intronic in U033544                                                  |
| Down at 6 hrs | A_65_P18225 | 0.78 | 0.023 |             |               | UNKNOWN                                                              |
| Down at 6 hrs | A_65_P19970 | 0.78 | 0.048 | NM_007726.1 | Cnr1          | Mus musculus cannabinoid receptor 1 (brain) (Cnr1), mRNA             |
| Down at 6 hrs | A_65_P20418 | 0.78 | 0.014 |             |               | UNKNOWN                                                              |
| Down at 6 hrs | A_65_P14039 | 0.78 | 0.001 | NM_024366.1 | Freq          | UNKNOWN                                                              |
| Down at 6 hrs | A_65_P19296 | 0.78 | 0.015 | AB061525.1  | Dscr111       | Mus musculus Down syndrome critical region gene 1-like 1 (Dscr111)   |
| Down at 6 hrs | A_65_P07528 | 0.78 | 0.020 |             |               | UNKNOWN                                                              |
| Down at 6 hrs | A_65_P11666 | 0.78 | 0.003 | AK018613.1  | 9130012D09Rik | UNKNOWN                                                              |
| Down at 6 hrs | A_65_P13982 | 0.78 | 0.025 | NM_033604.1 | Ark-pending   | Mus musculus arkadia (Ark-pending), mRNA                             |
| Down at 6 hrs | A_65_P15134 | 0.78 | 0.034 |             |               | UNKNOWN                                                              |
| Down at 6 hrs | A_65_P16078 | 0.78 | 0.026 |             | AA407270      | UNKNOWN                                                              |
| Down at 6 hrs | A_65_P17986 | 0.78 | 0.032 |             |               | Similar to: Mus musculus hypothetical gene supported by AK030912     |
| Down at 6 hrs | A_65_P19479 | 0.78 | 0.009 |             |               | Intronic in U016960                                                  |
| Down at 6 hrs | A_65_P19745 | 0.78 | 0.011 |             |               | UNKNOWN                                                              |
| Down at 6 hrs | A_65_P20291 | 0.78 | 0.042 | NM_008406.1 | Itih1         | Mus musculus inter-alpha trypsin inhibitor, heavy chain 1 (Itih1)    |
| Down at 6 hrs | A_65_P20482 | 0.78 | 0.022 | XM_149388.2 | AI835472      | ANKYRIN                                                              |
| Down at 6 hrs | A_65_P07504 | 0.78 | 0.004 |             |               | UNKNOWN                                                              |
| Down at 6 hrs | A_65_P08268 | 0.78 | 0.026 |             |               | Intronic in U038050                                                  |
| Down at 6 hrs | A_65_P19145 | 0.78 | 0.018 |             |               | UNKNOWN                                                              |
| Down at 6 hrs | A_65_P19201 | 0.78 | 0.024 | NM_027493.1 | Actr8         | Mus musculus actin-related protein 8 homolog (S. cerevisiae) (Actr8) |
| Down at 6 hrs | A_65_P20057 | 0.78 | 0.023 |             |               | Intronic in U000033                                                  |
| Down at 6 hrs | A_65_P11384 | 0.78 | 0.035 |             |               | REPEAT-SEQUENCE                                                      |
| Down at 6 hrs | A_65_P11426 | 0.78 | 0.020 | BC019170.1  | 4930433D19Rik | Mus musculus RIKEN cDNA 4930433D19 gene (4930433D19Rik), mRNA        |
| Down at 6 hrs | A_65_P14748 | 0.78 | 0.035 | XM_149367.1 |               | Intronic in U003673                                                  |
| Down at 6 hrs | A_65_P17107 | 0.78 | 0.032 |             | D13Ert666e    | Intronic in U034908                                                  |
| Down at 6 hrs | A_65_P11465 | 0.77 | 0.015 | NM_146112.1 | MGC38689      | Mus musculus hypothetical protein MGC38689 (MGC38689), mRNA          |
| Down at 6 hrs | A_65_P11773 | 0.77 | 0.030 | XM_122386.1 | AL024210      | Mus musculus expressed sequence AL024210 (AL024210), mRNA            |
| Down at 6 hrs | A_65_P19097 | 0.77 | 0.017 | XM_129224.1 | Tjp2          | Mus musculus tight junction protein 2 (Tjp2), mRNA                   |
| Down at 6 hrs | A_65_P08674 | 0.77 | 0.037 |             |               | UNKNOWN                                                              |
| Down at 6 hrs | A_65_P15987 | 0.77 | 0.022 |             | C80581        | UNKNOWN                                                              |
| Down at 6 hrs | A_65_P12272 | 0.77 | 0.049 | Z38015.1    | Dm15          | Similar to: M.musculus DMR-N9 gene, exons 4 and 5, and DM-PK gene    |
| Down at 6 hrs | A_65_P13415 | 0.77 | 0.033 | AK011386.1  | 2610012I03Rik | Mus musculus 10 days embryo whole body cDNA, RIKEN full-length en    |
| Down at 6 hrs | A_65_P12976 | 0.77 | 0.025 | XM_135250.1 | MGC37693      | Mus musculus hypothetical protein MGC37693 (MGC37693), mRNA          |
| Down at 6 hrs | A_65_P15073 | 0.77 | 0.028 | XM_131938.1 | 2810046M22Rik | Mus musculus RIKEN cDNA 2810046M22 gene (2810046M22Rik), mRNA        |
| Down at 6 hrs | A_65_P10475 | 0.77 | 0.030 | NM_011960.1 | Parg          | Mus musculus poly (ADP-ribose) glycohydrolase (Parg), mRNA           |
| Down at 6 hrs | A_65_P11563 | 0.77 | 0.018 |             |               | UNKNOWN                                                              |
| Down at 6 hrs | A_65_P17294 | 0.77 | 0.006 |             |               | UNKNOWN                                                              |
| Down at 6 hrs | A_65_P17442 | 0.77 | 0.047 |             |               | Intronic in U030147                                                  |
| Down at 6 hrs | A_65_P10485 | 0.77 | 0.024 | BC014733.1  | Yap           | Mus musculus yes-associated protein, 65 kDa (Yap), mRNA              |
| Down at 6 hrs | A_65_P13469 | 0.77 | 0.030 | NM_001270.1 | CHD1          | Similar to: Homo sapiens chromodomain helicase DNA binding protei    |
| Down at 6 hrs | A_65_P14125 | 0.77 | 0.005 | BC025555.1  | 4933435A13Rik | hypothetical ATP/GTP-binding site motif A (P-loop) containing pro    |
| Down at 6 hrs | A_65_P14448 | 0.77 | 0.007 | XM_132353.2 | 4930596O17Rik | SIRTUIN                                                              |
| Down at 6 hrs | A_65_P17870 | 0.77 | 0.016 |             |               | UNKNOWN                                                              |
| Down at 6 hrs | A_65_P19716 | 0.77 | 0.010 |             |               | Intronic in U021751                                                  |
| Down at 6 hrs | A_65_P11966 | 0.77 | 0.043 | NM_026163.1 | 1200008D14Rik | similar to PLAKOPHILIN 2 [Homo sapiens]                              |
| Down at 6 hrs | A_65_P18256 | 0.77 | 0.023 | BC018390.1  | Tdo2          | Mus musculus tryptophan 2,3-dioxygenase (Tdo2), mRNA                 |
| Down at 6 hrs | A_65_P14733 | 0.77 | 0.047 |             |               | UNKNOWN                                                              |
| Down at 6 hrs | A_65_P17712 | 0.77 | 0.016 |             | 0610025O11Rik | Mus musculus RIKEN cDNA 0610025O11 gene (0610025O11Rik), mRNA        |
| Down at 6 hrs | A_65_P20145 | 0.77 | 0.031 | AL832275.1  | D2Ert120e     | UNKNOWN                                                              |
| Down at 6 hrs | A_65_P18653 | 0.76 | 0.038 | XM_131167.1 | A930028L21Rik | CDNA FLJ11219 FIS, CLONE PLACE1008122 homolog [Homo sapiens]         |
| Down at 6 hrs | A_65_P19572 | 0.76 | 0.003 |             |               | UNKNOWN                                                              |
| Down at 6 hrs | A_65_P08561 | 0.76 | 0.027 | NM_007398.1 | Ada           | Mus musculus adenosine deaminase (Ada), mRNA                         |
| Down at 6 hrs | A_65_P13598 | 0.76 | 0.047 |             |               | Intronic in U029150                                                  |
| Down at 6 hrs | A_65_P16819 | 0.76 | 0.047 |             |               | Mus musculus aldehyde dehydrogenase 2, mitochondrial (Aldh2), mRN    |
| Down at 6 hrs | A_65_P19420 | 0.76 | 0.042 |             | Aldh2         | HISTOCOMPATIBILITY 2, CLASS II ANTIGEN E BETA. [Source:SPTREMBL:A    |
| Down at 6 hrs | A_65_P20059 | 0.76 | 0.036 |             | H2-Eb1        | UNKNOWN                                                              |
| Down at 6 hrs | A_65_P14263 | 0.76 | 0.017 | NM_013758.1 | AI467334      | UNKNOWN                                                              |
| Down at 6 hrs | A_65_P14681 | 0.76 | 0.032 |             | Add3          | Mus musculus adducin 3 (gamma) (Add3), mRNA                          |
|               |             |      |       |             | 2210407J23Rik | Mus musculus RIKEN cDNA 2210407J23 gene (2210407J23Rik), mRNA        |

|               |             |      |       |             |               |                                                                    |
|---------------|-------------|------|-------|-------------|---------------|--------------------------------------------------------------------|
| Down at 6 hrs | A_65_P14758 | 0.76 | 0.040 | XM_126112.1 | Sox15         | Mus musculus SRY-box containing gene 15 (Sox15), mRNA              |
| Down at 6 hrs | A_65_P13429 | 0.76 | 0.003 |             |               | UNKNOWN                                                            |
| Down at 6 hrs | A_65_P15768 | 0.76 | 0.015 | BC011271.1  | Mapkbp1       | Mus musculus mitogen activated protein kinase binding protein 1 (M |
| Down at 6 hrs | A_65_P18075 | 0.76 | 0.035 | BC019457.1  | 4930471M23Rik | hypothetical Integral membrane protein, DUF6 containing protein    |
| Down at 6 hrs | A_65_P20748 | 0.76 | 0.019 |             | Vps4b         | Mus musculus vacuolar protein sorting 4b (yeast) (Vps4b), mRNA     |
| Down at 6 hrs | A_65_P08005 | 0.76 | 0.006 |             |               | Intronic in U006885                                                |
| Down at 6 hrs | A_65_P11951 | 0.76 | 0.020 | NM_170786.1 | Cntf          | Mus musculus ciliary neurotropic factor (Cntf), mRNA               |
| Down at 6 hrs | A_65_P10347 | 0.76 | 0.020 |             |               | UNKNOWN                                                            |
| Down at 6 hrs | A_65_P11256 | 0.76 | 0.020 | XM_148836.2 | 2810012G03Rik | PUTATIVE NUCLEAR                                                   |
| Down at 6 hrs | A_65_P18061 | 0.76 | 0.041 | NM_012576.1 | Grl           | Mus musculus nuclear receptor subfamily 3, group C, member 1 (Nr3  |
| Down at 6 hrs | A_65_P19344 | 0.76 | 0.050 |             |               | UNKNOWN                                                            |
| Down at 6 hrs | A_65_P20349 | 0.76 | 0.007 |             |               | UNKNOWN                                                            |
| Down at 6 hrs | A_65_P20811 | 0.76 | 0.037 | NM_009214.1 | Sms           | Mus musculus spermine synthase (Sms), mRNA                         |
| Down at 6 hrs | A_65_P12238 | 0.75 | 0.044 |             |               | UNKNOWN                                                            |
| Down at 6 hrs | A_65_P18439 | 0.75 | 0.017 | NM_146119.1 | DKFZp434H0820 | Mus musculus hypothetical protein DKFZp434H0820 (DKFZp434H0820),   |
| Down at 6 hrs | A_65_P18536 | 0.75 | 0.011 |             |               | UNKNOWN                                                            |
| Down at 6 hrs | A_65_P12946 | 0.75 | 0.043 |             | AU019833      | Mus musculus niban protein (Niban), mRNA                           |
| Down at 6 hrs | A_65_P15795 | 0.75 | 0.027 | NM_016912.1 | Cdkl2         | Mus musculus cyclin-dependent kinase-like 2 (CDC2-related kinase)  |
| Down at 6 hrs | A_65_P17818 | 0.75 | 0.037 |             |               | Intronic in U005225                                                |
| Down at 6 hrs | A_65_P19519 | 0.75 | 0.044 |             | 9530026P05Rik | RIKEN cDNA 9530026P05 gene                                         |
| Down at 6 hrs | A_65_P19124 | 0.75 | 0.009 |             |               | Intronic in U009992                                                |
| Down at 6 hrs | A_65_P07153 | 0.75 | 0.036 | NM_019948.1 | Clecsf9       | Mus musculus C-type (calcium dependent, carbohydrate recognition   |
| Down at 6 hrs | A_65_P12140 | 0.75 | 0.029 | XM_131238.1 | Lhx8          | LIM/HOMEOBOX PROTEIN LHX8 (L3). [Source:SWISSPROT;Acc:O35652]      |
| Down at 6 hrs | A_65_P13652 | 0.75 | 0.043 | XM_135103.2 | 8430421I07Rik | Mus musculus RIKEN cDNA 8430421I07 gene (8430421I07Rik), mRNA      |
| Down at 6 hrs | A_65_P09677 | 0.75 | 0.036 | BC012724.1  | Igfbp2        | Mus musculus insulin-like growth factor binding protein 2 (Igfbp2  |
| Down at 6 hrs | A_65_P19339 | 0.75 | 0.022 | AF142645.1  |               | UNKNOWN                                                            |
| Down at 6 hrs | A_65_P20350 | 0.75 | 0.034 |             | Shank3        | Mus musculus SH3/ankyrin domain gene 3 (Shank3), mRNA              |
| Down at 6 hrs | A_65_P11423 | 0.75 | 0.008 | NM_130447.1 | Dusp16        | Mus musculus dual specificity phosphatase 16 (Dusp16), mRNA        |
| Down at 6 hrs | A_65_P10350 | 0.75 | 0.018 | XM_157219.1 | Spry4         | Mus musculus sprouty homolog 4 (Drosophila) (Spry4), mRNA          |
| Down at 6 hrs | A_65_P20733 | 0.75 | 0.014 |             | 1600013P15Rik | hypothetical Generic methyl-transferase/SAM (and some other nucle  |
| Down at 6 hrs | A_65_P07516 | 0.75 | 0.046 | BC003879.1  | Gatm          | Mus musculus glycine amidinotransferase (L-arginine:glycine amidi  |
| Down at 6 hrs | A_65_P18163 | 0.75 | 0.046 | XM_126963.2 | AW546258      | Mus musculus expressed sequence AW546258 (AW546258), mRNA          |
| Down at 6 hrs | A_65_P18819 | 0.75 | 0.032 | XM_133370.1 | 1600014C10Rik | Mus musculus RIKEN cDNA 1600014C10 gene (1600014C10Rik), mRNA      |
| Down at 6 hrs | A_65_P14583 | 0.75 | 0.049 |             | AU041474      | Intronic in U002987                                                |
| Down at 6 hrs | A_65_P20339 | 0.75 | 0.010 | XM_127752.1 | 5033415K03Rik | RIKEN CDNA K03                                                     |
| Down at 6 hrs | A_65_P16277 | 0.74 | 0.019 |             |               | UNKNOWN                                                            |
| Down at 6 hrs | A_65_P19286 | 0.74 | 0.037 |             |               | UNKNOWN                                                            |
| Down at 6 hrs | A_65_P16640 | 0.74 | 0.036 |             |               | Intronic in U030993                                                |
| Down at 6 hrs | A_65_P17453 | 0.74 | 0.032 | NM_009197.1 | Slc16a2       | UNKNOWN                                                            |
| Down at 6 hrs | A_65_P18436 | 0.74 | 0.024 | NM_018790.1 | Arc           | Mus musculus activity regulated cytoskeletal-associated protein (  |
| Down at 6 hrs | A_65_P19571 | 0.74 | 0.004 |             |               | Intronic in U032656                                                |
| Down at 6 hrs | A_65_P12279 | 0.74 | 0.021 |             |               | UNKNOWN                                                            |
| Down at 6 hrs | A_65_P15674 | 0.74 | 0.040 |             |               | UNKNOWN                                                            |
| Down at 6 hrs | A_65_P09717 | 0.74 | 0.020 |             | C78280        | UNKNOWN                                                            |
| Down at 6 hrs | A_65_P19400 | 0.74 | 0.016 |             |               | ZINC FINGER PROTEIN                                                |
| Down at 6 hrs | A_65_P19578 | 0.74 | 0.017 |             | AU021128      | UNKNOWN                                                            |
| Down at 6 hrs | A_65_P11933 | 0.74 | 0.044 |             |               | UNKNOWN                                                            |
| Down at 6 hrs | A_65_P12436 | 0.74 | 0.029 | BC040249.1  | 1700065A05Rik | RIKEN cDNA 1700065A05 gene                                         |
| Down at 6 hrs | A_65_P14284 | 0.74 | 0.014 |             |               | Intronic in U011458                                                |
| Down at 6 hrs | A_65_P17814 | 0.74 | 0.018 |             |               | Intronic in U024371                                                |
| Down at 6 hrs | A_65_P19475 | 0.74 | 0.005 |             |               | UNKNOWN                                                            |
| Down at 6 hrs | A_65_P20436 | 0.74 | 0.026 | BC023954.1  | Elmo2         | UNKNOWN                                                            |
| Down at 6 hrs | A_65_P20705 | 0.74 | 0.018 |             | AU042636      | UNKNOWN                                                            |
| Down at 6 hrs | A_65_P17879 | 0.74 | 0.029 | NM_138660.1 | Mln51-pending | Mus musculus MLN51 protein (Mln51-pending), mRNA                   |
| Down at 6 hrs | A_65_P20435 | 0.74 | 0.039 |             | D2Wsu131e     | CRP2 BINDING PROTEIN                                               |
| Down at 6 hrs | A_65_P15281 | 0.74 | 0.024 |             | Ophn1         | Mus musculus oligophrenin 1 (Ophn1), mRNA                          |
| Down at 6 hrs | A_65_P15583 | 0.74 | 0.008 |             |               | Intronic in U015959                                                |
| Down at 6 hrs | A_65_P16728 | 0.74 | 0.037 | BC021757.1  | Hcngp-pending | Mus musculus transcriptional regulator protein (Hcngp-pending), m  |

|               |             |      |       |             |               |                                                                   |
|---------------|-------------|------|-------|-------------|---------------|-------------------------------------------------------------------|
| Down at 6 hrs | A_65_P01110 | 0.74 | 0.021 |             |               | UNKNOWN                                                           |
| Down at 6 hrs | A_65_P10712 | 0.74 | 0.001 |             |               | FATTY ACID                                                        |
| Down at 6 hrs | A_65_P14828 | 0.74 | 0.004 | XM_134545.1 | LOC234737     | REPEAT-SEQUENCE                                                   |
| Down at 6 hrs | A_65_P10569 | 0.73 | 0.000 |             | 1110036B02Rik | Mus musculus sema domain, immunoglobulin domain (Ig), short basic |
| Down at 6 hrs | A_65_P13149 | 0.73 | 0.024 | AP001295.1  | Kcnq1         | Similar to: Mus musculus 7 days neonate cerebellum cDNA, RIKEN fu |
| Down at 6 hrs | A_65_P14756 | 0.73 | 0.008 |             | C77798        | Intronic in U028428                                               |
| Down at 6 hrs | A_65_P17020 | 0.73 | 0.041 | XM_132214.1 | Tgfb3         | BETAGLYCAN. [Source:SPTREMBL;Acc:O88393]                          |
| Down at 6 hrs | A_65_P10627 | 0.73 | 0.011 | NM_010174.1 | Fabp3         | Mus musculus fatty acid binding protein 3, muscle and heart (Fabp |
| Down at 6 hrs | A_65_P12575 | 0.73 | 0.020 |             |               | Intronic in U003840                                               |
| Down at 6 hrs | A_65_P18629 | 0.73 | 0.049 | NM_025902.1 | 1500009M05Rik | Mus musculus RIKEN cDNA 1500009M05 gene (1500009M05Rik), mRNA     |
| Down at 6 hrs | A_65_P20610 | 0.73 | 0.040 | XM_128751.2 | Crim1         | CYSTEINE-RICH REPEAT-CONTAINING PROTEIN CRIM1 PRECURSOR (FRAGMENT |
| Down at 6 hrs | A_65_P17521 | 0.73 | 0.027 | AF357397.1  |               | Intronic in U015135                                               |
| Down at 6 hrs | A_65_P19494 | 0.73 | 0.049 |             |               | Intronic in U002972                                               |
| Down at 6 hrs | A_65_P10615 | 0.73 | 0.008 | BC024687.1  | vang          | Similar to: Mus musculus, similar to loop tail associated protein |
| Down at 6 hrs | A_65_P16346 | 0.73 | 0.021 | NM_009376.1 | TgN737Rpw     | Mus musculus transgene insert site 737, insertional mutation, pol |
| Down at 6 hrs | A_65_P19488 | 0.73 | 0.002 |             | C330007P06Rik | UNKNOWN                                                           |
| Down at 6 hrs | A_65_P11065 | 0.73 | 0.002 |             |               | Intronic in U013707                                               |
| Down at 6 hrs | A_65_P16950 | 0.73 | 0.019 |             |               | UNKNOWN                                                           |
| Down at 6 hrs | A_65_P10340 | 0.73 | 0.006 | XM_165592.2 | Aplp2         | Mus musculus amyloid beta (A4) precursor-like protein 2 (Aplp2),  |
| Down at 6 hrs | A_65_P13248 | 0.73 | 0.016 | NM_026274.1 | 4930470D19Rik | Mus musculus RIKEN cDNA 4930470D19 gene (4930470D19Rik), mRNA     |
| Down at 6 hrs | A_65_P17679 | 0.73 | 0.033 |             |               | Intronic in U014215                                               |
| Down at 6 hrs | A_65_P09336 | 0.73 | 0.036 |             | AI447372      | PROBABLE DOLICHYL PYROPHOSPHATE GLC1MAN9GLCNAC2 ALPHA 1,3 GLUCOSY |
| Down at 6 hrs | A_65_P14500 | 0.73 | 0.046 |             | Atp7b         | Mus musculus ATPase, Cu++ transporting, beta polypeptide (Atp7b), |
| Down at 6 hrs | A_65_P20247 | 0.73 | 0.047 |             |               | UNKNOWN                                                           |
| Down at 6 hrs | A_65_P09243 | 0.73 | 0.029 | NM_022023.1 | Gmfb          | Mus musculus glia maturation factor, beta (Gmfb), mRNA            |
| Down at 6 hrs | A_65_P18069 | 0.73 | 0.023 |             |               | Intronic in U004744                                               |
| Down at 6 hrs | A_65_P10253 | 0.72 | 0.013 |             |               | Intronic in U013197                                               |
| Down at 6 hrs | A_65_P11095 | 0.72 | 0.015 | NM_025853.1 | 1700022L09Rik | Mus musculus RIKEN cDNA 1700022L09 gene (1700022L09Rik), mRNA     |
| Down at 6 hrs | A_65_P09595 | 0.72 | 0.005 |             | C87398        | UNKNOWN                                                           |
| Down at 6 hrs | A_65_P19770 | 0.72 | 0.023 |             |               | UNKNOWN                                                           |
| Down at 6 hrs | A_65_P12829 | 0.72 | 0.031 |             |               | UNKNOWN                                                           |
| Down at 6 hrs | A_65_P09695 | 0.72 | 0.027 | NM_013629.1 | Phtf          | Mus musculus putative homeodomain transcription factor (Phtf), mR |
| Down at 6 hrs | A_65_P10953 | 0.72 | 0.010 |             | 4833436O05    | EUKARYOTIC TRANSLATION INITIATION FACTOR 4 GAMMA EIF 4 GAMMA EIF  |
| Down at 6 hrs | A_65_P15294 | 0.72 | 0.041 | XM_125673.1 | D10Erttd17e   | Similar to: Mus musculus DNA segment, Chr 10, ERATO Doi 17, expe  |
| Down at 6 hrs | A_65_P15497 | 0.72 | 0.037 |             |               | UNKNOWN                                                           |
| Down at 6 hrs | A_65_P17433 | 0.72 | 0.046 |             | Gna14         | Mus musculus guanine nucleotide binding protein, alpha 14 (Gna14) |
| Down at 6 hrs | A_65_P20546 | 0.72 | 0.023 | XM_148574.1 | 5830465I20    | similar to CDNA FLJ11301 FIS, CLONE PLACE1009908, WEAKLY SIMILAR  |
| Down at 6 hrs | A_65_P12166 | 0.72 | 0.033 |             |               | UNKNOWN                                                           |
| Down at 6 hrs | A_65_P20051 | 0.72 | 0.021 |             | ErbB2ip       | Mus musculus ErbB2 interacting protein (ErbB2ip), mRNA            |
| Down at 6 hrs | A_65_P13155 | 0.72 | 0.025 | BC021528.1  |               | UNKNOWN                                                           |
| Down at 6 hrs | A_65_P11740 | 0.72 | 0.013 |             |               | Intronic in U021789                                               |
| Down at 6 hrs | A_65_P14918 | 0.72 | 0.010 |             |               | UNKNOWN                                                           |
| Down at 6 hrs | A_65_P15584 | 0.72 | 0.001 |             | AI036339      | Mus musculus RIKEN cDNA 2700069E09 gene (2700069E09Rik), mRNA     |
| Down at 6 hrs | A_65_P16639 | 0.72 | 0.037 | AB024689.1  | Six4          | HOMEBOX PROTEIN SIX4 (SINE OCULIS HOMEBOX HOMOLOG 4) (SKELETAL    |
| Down at 6 hrs | A_65_P17883 | 0.72 | 0.046 | XM_134858.2 | D9Bwg1455e    | DNA segment, Chr 9, Brigham & Womens Genetics 1455 expressed      |
| Down at 6 hrs | A_65_P08469 | 0.71 | 0.010 |             |               | UNKNOWN                                                           |
| Down at 6 hrs | A_65_P12423 | 0.71 | 0.022 | XM_127012.2 | Skiip         | NUCLEAR PROTEIN SKIP SKI INTERACTING PROTEIN SNW1 PROTEIN NUCLEAR |
| Down at 6 hrs | A_65_P14732 | 0.71 | 0.028 |             |               | UNKNOWN                                                           |
| Down at 6 hrs | A_65_P13030 | 0.71 | 0.006 |             |               | UNKNOWN                                                           |
| Down at 6 hrs | A_65_P17321 | 0.71 | 0.013 |             |               | ZINC FINGER PROTEIN                                               |
| Down at 6 hrs | A_65_P11163 | 0.71 | 0.009 |             |               | Intronic in U004518                                               |
| Down at 6 hrs | A_65_P14846 | 0.71 | 0.016 | XM_129172.1 |               | hypothetical Actinin-type actin-binding domain containing protein |
| Down at 6 hrs | A_65_P16558 | 0.71 | 0.016 |             |               | UNKNOWN                                                           |
| Down at 6 hrs | A_65_P11707 | 0.71 | 0.042 | AF247663.1  | Hoxa6         | Intronic in U006869                                               |
| Down at 6 hrs | A_65_P11518 | 0.71 | 0.027 |             |               | Intronic in U012644                                               |
| Down at 6 hrs | A_65_P16461 | 0.71 | 0.045 |             |               | UNKNOWN                                                           |
| Down at 6 hrs | A_65_P18529 | 0.71 | 0.005 |             |               | Intronic in U031723                                               |
| Down at 6 hrs | A_65_P14090 | 0.71 | 0.037 | BC006920.1  | Cd2bp2        | Mus musculus CD2 antigen (cytoplasmic tail) binding protein 2 (Cd |



|               |             |      |       |             |                |                                                                                                                                            |
|---------------|-------------|------|-------|-------------|----------------|--------------------------------------------------------------------------------------------------------------------------------------------|
| Down at 6 hrs | A_65_P07704 | 0.71 | 0.048 |             |                | Intronic in U021545                                                                                                                        |
| Down at 6 hrs | A_65_P12244 | 0.71 | 0.033 | NM_030712.1 | Cxcr6          | Mus musculus chemokine (C-X-C) receptor 6 (Cxcr6), mRNA                                                                                    |
| Down at 6 hrs | A_65_P13732 | 0.71 | 0.023 | AK018620.1  | Zfp91          | Mus musculus ciliary neurotropic factor (Cntf), mRNA                                                                                       |
| Down at 6 hrs | A_65_P17369 | 0.71 | 0.030 |             |                | Intronic in U006654                                                                                                                        |
| Down at 6 hrs | A_65_P18559 | 0.71 | 0.019 | XM_127448.1 | Cspg2          | Mus musculus chondroitin sulfate proteoglycan 2 (Cspg2), mRNA                                                                              |
| Down at 6 hrs | A_65_P15771 | 0.71 | 0.034 | XM_149749.1 | Tgoln2         | Similar to: Mus musculus trans-golgi network protein 2 (Tgoln2), weakly similar to NEDD-4 PROTEIN (EC 6.3.2.-) (FRAGMENT) [Mus mus UNKNOWN |
| Down at 6 hrs | A_65_P17663 | 0.71 | 0.026 |             |                |                                                                                                                                            |
| Down at 6 hrs | A_65_P17678 | 0.71 | 0.028 |             |                |                                                                                                                                            |
| Down at 6 hrs | A_65_P17729 | 0.71 | 0.023 | XM_110703.1 |                | Similar to: Mus musculus similar to Gag polyprotein [Mus musculus                                                                          |
| Down at 6 hrs | A_65_P11516 | 0.70 | 0.045 | BC025424.1  | Zfp106         | Mus musculus SH3-domain binding protein 3 (Sh3bp3), mRNA                                                                                   |
| Down at 6 hrs | A_65_P16475 | 0.70 | 0.006 |             |                | UNKNOWN                                                                                                                                    |
| Down at 6 hrs | A_65_P12331 | 0.70 | 0.024 |             | C81521         | UNKNOWN                                                                                                                                    |
| Down at 6 hrs | A_65_P14657 | 0.70 | 0.034 | NM_172284.1 | LOC234733      | ATP DEPENDENT RNA HELICASE DDX19 DEAD BOX PROTEIN 19 DEAD BOX RNA                                                                          |
| Down at 6 hrs | A_65_P16249 | 0.70 | 0.005 |             |                | UNKNOWN                                                                                                                                    |
| Down at 6 hrs | A_65_P18181 | 0.70 | 0.000 | D14637.1    | Runx2          | Mouse mRNA for PEBP2a2 protein, complete cds                                                                                               |
| Down at 6 hrs | A_65_P19567 | 0.70 | 0.002 | XM_135102.1 | Ccrl1          | hypothetical Acyl-CoA dehydrogenase containing protein                                                                                     |
| Down at 6 hrs | A_65_P17621 | 0.70 | 0.019 | NM_011717.1 | Wiz            | Mus musculus widely-interspaced zinc finger motifs (Wiz), mRNA                                                                             |
| Down at 6 hrs | A_65_P18250 | 0.70 | 0.028 | NM_026776.1 |                | UNKNOWN                                                                                                                                    |
| Down at 6 hrs | A_65_P19673 | 0.70 | 0.005 |             |                | Intronic in U030116                                                                                                                        |
| Down at 6 hrs | A_65_P20039 | 0.70 | 0.010 |             |                | REPEAT-SEQUENCE                                                                                                                            |
| Down at 6 hrs | A_65_P20147 | 0.70 | 0.027 | XM_178617.1 | 2810055G22Rik  | TRIAD3 {Homo sapiens}                                                                                                                      |
| Down at 6 hrs | A_65_P20818 | 0.70 | 0.048 |             |                | Intronic in U040652                                                                                                                        |
| Down at 6 hrs | A_65_P16173 | 0.70 | 0.044 | NM_015801.1 | Nte            | Mus musculus neuropathy target esterase (Nte), mRNA                                                                                        |
| Down at 6 hrs | A_65_P17864 | 0.70 | 0.029 |             | AW457162       | RIKEN cDNA 1600010M23 gene                                                                                                                 |
| Down at 6 hrs | A_65_P19385 | 0.70 | 0.037 |             |                | UNKNOWN                                                                                                                                    |
| Down at 6 hrs | A_65_P15314 | 0.70 | 0.030 |             |                | Intronic in U035008                                                                                                                        |
| Down at 6 hrs | A_65_P19667 | 0.70 | 0.021 |             |                | Intronic in U013495                                                                                                                        |
| Down at 6 hrs | A_65_P06829 | 0.70 | 0.013 |             | 0610033L19Rik  | Mus musculus hypothetical protein MGC30806 (MGC30806), mRNA                                                                                |
| Down at 6 hrs | A_65_P11750 | 0.70 | 0.016 | NM_025505.1 | 1700030G05Rik  | Mus musculus RIKEN cDNA 1700030G05 gene (1700030G05Rik), mRNA                                                                              |
| Down at 6 hrs | A_65_P12886 | 0.69 | 0.028 |             |                | UNKNOWN                                                                                                                                    |
| Down at 6 hrs | A_65_P10438 | 0.69 | 0.008 |             |                | Intronic in U036563                                                                                                                        |
| Down at 6 hrs | A_65_P11126 | 0.69 | 0.037 | AY079003.1  | Foxp2          | Mus musculus forkhead box P2 (Foxp2), mRNA                                                                                                 |
| Down at 6 hrs | A_65_P20146 | 0.69 | 0.012 |             |                | UNKNOWN                                                                                                                                    |
| Down at 6 hrs | A_65_P11589 | 0.69 | 0.020 | BC026648.1  | Milt4          | Similar to: Mus musculus hypothetical protein 5033403D15 (5033403                                                                          |
| Down at 6 hrs | A_65_P11832 | 0.69 | 0.003 | NM_019650.2 | Gosr2          | Mus musculus golgi SNAP receptor complex member 2 (Gosr2), mRNA                                                                            |
| Down at 6 hrs | A_65_P12826 | 0.69 | 0.010 | XM_137879.1 | 3526402J09     | REPEAT-SEQUENCE                                                                                                                            |
| Down at 6 hrs | A_65_P16056 | 0.69 | 0.007 | NM_027877.1 | 1200008A18Rik  | Mus musculus RIKEN cDNA 1200008A18 gene (1200008A18Rik), mRNA                                                                              |
| Down at 6 hrs | A_65_P18623 | 0.69 | 0.019 | AE014180.1  |                | Intronic in U004559                                                                                                                        |
| Down at 6 hrs | A_65_P11864 | 0.69 | 0.028 |             | AU022255       | UNKNOWN                                                                                                                                    |
| Down at 6 hrs | A_65_P14413 | 0.69 | 0.033 |             |                | UNKNOWN                                                                                                                                    |
| Down at 6 hrs | A_65_P19135 | 0.69 | 0.013 | NM_009044.1 | Rel            | Mus musculus reticuloendotheliosis oncogene (Rel), mRNA                                                                                    |
| Down at 6 hrs | A_65_P19406 | 0.69 | 0.041 | NM_011803.1 | Copeb          | Mus musculus core promoter element binding protein (Copeb), mRNA                                                                           |
| Down at 6 hrs | A_65_P09295 | 0.69 | 0.025 | NM_026121.1 | Bag4           | Mus musculus BCL2-associated athanogene 4 (Bag4), mRNA                                                                                     |
| Down at 6 hrs | A_65_P18581 | 0.69 | 0.005 |             |                | Intronic in U022324                                                                                                                        |
| Down at 6 hrs | A_65_P13323 | 0.68 | 0.048 | NM_080599.1 |                | REGULATOR OF NONSENSE TRANSCRIPTS 2                                                                                                        |
| Down at 6 hrs | A_65_P14120 | 0.68 | 0.022 |             |                | UNKNOWN                                                                                                                                    |
| Down at 6 hrs | A_65_P20351 | 0.68 | 0.011 |             |                | Intronic in U038222                                                                                                                        |
| Down at 6 hrs | A_65_P09577 | 0.68 | 0.021 | BC024835.1  | Ssrp1          | STRUCTURE-SPECIFIC RECOGNITION PROTEIN 1 (SSRP1) (RECOMBINATION S                                                                          |
| Down at 6 hrs | A_65_P12300 | 0.68 | 0.008 |             |                | REPEAT-SEQUENCE                                                                                                                            |
| Down at 6 hrs | A_65_P20239 | 0.68 | 0.003 | NM_145583.1 | LOC233575      | Mus musculus similar to FGF receptor activating protein 1 (LOC233                                                                          |
| Down at 6 hrs | A_65_P20525 | 0.68 | 0.034 | XM_181356.1 | Jup            | JUNCTION PLAKOGLOBIN (DESMOPLAKIN III) (FRAGMENT). [Source:SWISSP                                                                          |
| Down at 6 hrs | A_65_P08163 | 0.68 | 0.017 |             |                | Intronic in U002838                                                                                                                        |
| Down at 6 hrs | A_65_P16445 | 0.68 | 0.026 |             |                | UNKNOWN                                                                                                                                    |
| Down at 6 hrs | A_65_P16847 | 0.68 | 0.007 | NM_018756.2 | Tcstv1-pending | Mus musculus 2-cell-stage, variable group, member 1 (Tcstv1-pendi                                                                          |
| Down at 6 hrs | A_65_P18437 | 0.68 | 0.030 | NM_012294.1 | C86120         | UNKNOWN                                                                                                                                    |
| Down at 6 hrs | A_65_P20346 | 0.68 | 0.016 | BC011132.1  | Satb1          | special AT-rich sequence binding protein 1. Possibly unspliced.                                                                            |
| Down at 6 hrs | A_65_P20477 | 0.68 | 0.049 | NM_019711.1 | Rbms2          | Mus musculus RNA binding motif, single stranded interacting prote                                                                          |
| Down at 6 hrs | A_65_P12706 | 0.68 | 0.035 |             |                | UNKNOWN                                                                                                                                    |

|               |             |      |       |             |               |                                                                   |
|---------------|-------------|------|-------|-------------|---------------|-------------------------------------------------------------------|
| Down at 6 hrs | A_65_P16924 | 0.68 | 0.049 |             | Pola1         | DNA polymerase alpha 1, 180 kDa. Unspliced                        |
| Down at 6 hrs | A_65_P20711 | 0.68 | 0.001 |             |               | UNKNOWN                                                           |
| Down at 6 hrs | A_65_P10813 | 0.68 | 0.015 |             |               | UNKNOWN                                                           |
| Down at 6 hrs | A_65_P12224 | 0.68 | 0.029 | NM_145144.1 | 2810003C17Rik | Mus musculus expressed sequence AI043124 (AI043124), mRNA         |
| Down at 6 hrs | A_65_P00716 | 0.68 | 0.033 | NM_026892.1 | 1500010M16Rik | UNKNOWN                                                           |
| Down at 6 hrs | A_65_P11687 | 0.68 | 0.020 |             |               | Intronic in U026971                                               |
| Down at 6 hrs | A_65_P19122 | 0.68 | 0.011 |             | Synj2         | Mus musculus synaptojanin 2 (Synj2), mRNA                         |
| Down at 6 hrs | A_65_P19227 | 0.68 | 0.007 |             |               | Intronic in U037074                                               |
| Down at 6 hrs | A_65_P16825 | 0.67 | 0.038 |             |               | Intronic in U032926                                               |
| Down at 6 hrs | A_65_P16931 | 0.67 | 0.004 | NM_153547.1 | BC037996      | Mus musculus hypothetical protein MGC46970 (MGC46970), mRNA       |
| Down at 6 hrs | A_65_P15519 | 0.67 | 0.025 |             |               | UNKNOWN                                                           |
| Down at 6 hrs | A_65_P19314 | 0.67 | 0.028 | XM_127325.2 | 6230416A05Rik | SIMILAR TO                                                        |
| Down at 6 hrs | A_65_P09679 | 0.67 | 0.042 |             |               | Intronic in U024623                                               |
| Down at 6 hrs | A_65_P15392 | 0.67 | 0.014 | NM_153556.1 | MGC36491      | Mus musculus hypothetical protein MGC36491 (MGC36491), mRNA       |
| Down at 6 hrs | A_65_P19935 | 0.67 | 0.040 |             |               | Intronic in U026257                                               |
| Down at 6 hrs | A_65_P20257 | 0.67 | 0.016 | NM_010322.1 | Gnpat         | Mus musculus glyceronephosphate O-acyltransferase (Gnpat), mRNA   |
| Down at 6 hrs | A_65_P05421 | 0.67 | 0.029 |             |               | G-protein beta WD-40 repeats with Beige/BEACH domain containing p |
| Down at 6 hrs | A_65_P09141 | 0.67 | 0.035 | XM_129193.2 | 6720480F16Rik | BRAIN CDNA, CLONE MNCB-4327 (FRAGMENT). [Source:SPTREMBL;Acc:Q9JJ |
| Down at 6 hrs | A_65_P13269 | 0.67 | 0.019 |             |               | Intronic in U032872                                               |
| Down at 6 hrs | A_65_P18748 | 0.67 | 0.000 | AJ012077.1  |               | UNKNOWN                                                           |
| Down at 6 hrs | A_65_P19316 | 0.67 | 0.016 |             | 5730434I03Rik | TRANSCRIPTION FACTOR BTF3 RNA POLYMERASE B TRANSCRIPTION FACTOR   |
| Down at 6 hrs | A_65_P19480 | 0.67 | 0.033 |             |               | Intronic in U015885                                               |
| Down at 6 hrs | A_65_P20064 | 0.67 | 0.045 | XM_129924.1 | MGC38689      | UNKNOWN                                                           |
| Down at 6 hrs | A_65_P11280 | 0.67 | 0.003 | NM_009555.1 | Zfp40         | Mus musculus zinc finger protein 40 (Zfp40), mRNA                 |
| Down at 6 hrs | A_65_P18290 | 0.67 | 0.040 |             |               | UNKNOWN                                                           |
| Down at 6 hrs | A_65_P12583 | 0.66 | 0.003 |             |               | UNKNOWN                                                           |
| Down at 6 hrs | A_65_P09325 | 0.66 | 0.044 |             |               | UNKNOWN                                                           |
| Down at 6 hrs | A_65_P14375 | 0.66 | 0.004 |             |               | UNKNOWN                                                           |
| Down at 6 hrs | A_65_P14682 | 0.66 | 0.027 |             |               | Intronic in U007304                                               |
| Down at 6 hrs | A_65_P17022 | 0.66 | 0.037 |             |               | Intronic in U004986                                               |
| Down at 6 hrs | A_65_P17455 | 0.66 | 0.046 | XM_131596.1 | 1700041C02Rik | RIKEN cDNA 1700041C02 gene                                        |
| Down at 6 hrs | A_65_P19672 | 0.66 | 0.018 | NM_013835.1 | Ssa2          | UNKNOWN                                                           |
| Down at 6 hrs | A_65_P14745 | 0.66 | 0.009 | BC028306.1  | Gpx3          | Mus musculus RIKEN cDNA 2810441A10 gene (2810441A10Rik), mRNA     |
| Down at 6 hrs | A_65_P18176 | 0.66 | 0.003 |             |               | Intronic in U021949                                               |
| Down at 6 hrs | A_65_P18627 | 0.66 | 0.017 |             | AW457082      | Mus musculus casein kinase 1, epsilon (Csnk1e), mRNA              |
| Down at 6 hrs | A_65_P19951 | 0.66 | 0.006 | NM_053208.2 | Egln2         | Mus musculus EGL nine homolog 2 (C. elegans) (Egln2), mRNA        |
| Down at 6 hrs | A_65_P09990 | 0.66 | 0.031 |             |               | UNKNOWN                                                           |
| Down at 6 hrs | A_65_P10547 | 0.66 | 0.019 | AJ307670.1  | Rpl27a        | UNKNOWN                                                           |
| Down at 6 hrs | A_65_P11141 | 0.66 | 0.009 | BC025066.1  | Dusp10        | Mus musculus dual specificity phosphatase 10 (Dusp10), mRNA       |
| Down at 6 hrs | A_65_P10268 | 0.66 | 0.016 |             |               | Intronic in U041010                                               |
| Down at 6 hrs | A_65_P11781 | 0.66 | 0.023 | NM_019812.1 | Sirt1         | Mus musculus sirtuin 1 ((silent mating type information regulatio |
| Down at 6 hrs | A_65_P11842 | 0.66 | 0.022 | NM_009584.1 | Zrf2          | UNKNOWN                                                           |
| Down at 6 hrs | A_65_P18363 | 0.65 | 0.024 |             |               | Intronic in U016897                                               |
| Down at 6 hrs | A_65_P12055 | 0.65 | 0.018 | XM_179101.1 |               | Intronic in U035091                                               |
| Down at 6 hrs | A_65_P13096 | 0.65 | 0.038 | BC005576.1  |               | hypothetical Lysine-rich region containing protein                |
| Down at 6 hrs | A_65_P15157 | 0.65 | 0.013 |             |               | Intronic in U005861                                               |
| Down at 6 hrs | A_65_P11565 | 0.65 | 0.022 | XM_128707.2 |               | Mus musculus similar to crumbs 3 [Homo sapiens] (LOC224912), mRNA |
| Down at 6 hrs | A_65_P13331 | 0.65 | 0.043 | BC024630.1  | Copeb         | Intronic in U014823                                               |
| Down at 6 hrs | A_65_P17682 | 0.65 | 0.010 |             |               | UNKNOWN                                                           |
| Down at 6 hrs | A_65_P20364 | 0.65 | 0.020 |             | MGC38791      | MSZF52 (FRAGMENT). [Source:SPTREMBL;Acc:O88247]                   |
| Down at 6 hrs | A_65_P12844 | 0.65 | 0.036 |             |               | Intronic in U002134                                               |
| Down at 6 hrs | A_65_P18741 | 0.65 | 0.014 |             |               | Intronic in U031251                                               |
| Down at 6 hrs | A_65_P20068 | 0.65 | 0.006 | XM_152068.1 |               | Similar to: Mus musculus LOC237527 (LOC237527), mRNA              |
| Down at 6 hrs | A_65_P18910 | 0.65 | 0.010 | AB031082.1  | Tnfrsf10b     | Mus musculus Rho-related BTB domain containing 2 (Rhobtb2), mRNA  |
| Down at 6 hrs | A_65_P19383 | 0.65 | 0.021 |             |               | Intronic in U041635                                               |
| Down at 6 hrs | A_65_P03121 | 0.65 | 0.042 |             |               | Intronic in U018222                                               |
| Down at 6 hrs | A_65_P12179 | 0.65 | 0.000 | XM_148655.1 |               | UNKNOWN                                                           |
| Down at 6 hrs | A_65_P13161 | 0.65 | 0.028 | Y00169.1    |               | weakly similar to BETA-TROPOMYOSIN (FRAGMENT) [Homo sapiens]      |

|               |             |      |       |             |               |                                                                   |
|---------------|-------------|------|-------|-------------|---------------|-------------------------------------------------------------------|
| Down at 6 hrs | A_65_P20190 | 0.65 | 0.042 |             | Taf7l         | Mus musculus TAF7-like RNA polymerase II, TATA box binding protei |
| Down at 6 hrs | A_65_P12619 | 0.64 | 0.041 |             |               | UNKNOWN                                                           |
| Down at 6 hrs | A_65_P18058 | 0.64 | 0.023 | NM_133957.2 | Nfat5         | Mus musculus nuclear factor of activated T-cells 5 (Nfat5), mRNA  |
| Down at 6 hrs | A_65_P11270 | 0.64 | 0.015 | NM_022015.1 | Tbn           | Mus musculus taube nuss (Tbn), mRNA                               |
| Down at 6 hrs | A_65_P14108 | 0.64 | 0.034 |             |               | Intronic in U043514                                               |
| Down at 6 hrs | A_65_P06409 | 0.64 | 0.048 | NM_019425.1 | Gnpnat1       | Mus musculus glucosamine-phosphate N-acetyltransferase 1 (Gpnat1) |
| Down at 6 hrs | A_65_P11404 | 0.64 | 0.047 |             | Tcea1         | UNKNOWN                                                           |
| Down at 6 hrs | A_65_P12489 | 0.64 | 0.043 |             | 2810403B08Rik | Mus musculus RIKEN cDNA 2810403B08 gene (2810403B08Rik), mRNA     |
| Down at 6 hrs | A_65_P16824 | 0.64 | 0.039 | AK017537.1  | Cebpa-rs1     | Mus musculus CCAAT/enhancer binding protein alpha (C/EBP), relate |
| Down at 6 hrs | A_65_P18942 | 0.64 | 0.032 |             |               | UNKNOWN                                                           |
| Down at 6 hrs | A_65_P19275 | 0.64 | 0.031 |             | AU017498      | UNKNOWN                                                           |
| Down at 6 hrs | A_65_P20333 | 0.64 | 0.009 | NM_007859.1 | Dffb          | Mus musculus DNA fragmentation factor, 40 kD, beta subunit (Dffb) |
| Down at 6 hrs | A_65_P20713 | 0.64 | 0.032 | BC019379.1  | Gprk5         | UNKNOWN                                                           |
| Down at 6 hrs | A_65_P11196 | 0.64 | 0.011 |             |               | Intronic in U022574                                               |
| Down at 6 hrs | A_65_P11669 | 0.64 | 0.014 | NM_145950.1 | BC010311      | Mus musculus cDNA sequence BC010311 (BC010311), mRNA              |
| Down at 6 hrs | A_65_P14941 | 0.64 | 0.008 |             |               | UNKNOWN                                                           |
| Down at 6 hrs | A_65_P17888 | 0.64 | 0.030 |             |               | Intronic in U031895                                               |
| Down at 6 hrs | A_65_P17478 | 0.64 | 0.037 |             |               | UNKNOWN                                                           |
| Down at 6 hrs | A_65_P19477 | 0.64 | 0.029 | XM_133631.2 | AI451340      | CDNA FLJ13119 FIS, CLONE NT2RP3002671, WEAKLY SIMILAR TO ELONGATI |
| Down at 6 hrs | A_65_P15152 | 0.64 | 0.042 |             | AI847934      | UNKNOWN                                                           |
| Down at 6 hrs | A_65_P13414 | 0.64 | 0.013 |             |               | Intronic in U002583                                               |
| Down at 6 hrs | A_65_P17885 | 0.63 | 0.045 |             |               | UNKNOWN                                                           |
| Down at 6 hrs | A_65_P11663 | 0.63 | 0.004 |             |               | UNKNOWN                                                           |
| Down at 6 hrs | A_65_P13980 | 0.63 | 0.048 |             |               | Intronic in U022631                                               |
| Down at 6 hrs | A_65_P13090 | 0.63 | 0.006 |             |               | WEE1 LIKE PROTEIN KINASE                                          |
| Down at 6 hrs | A_65_P10803 | 0.63 | 0.025 | XM_178418.1 | 2310038G18Rik | UNKNOWN                                                           |
| Down at 6 hrs | A_65_P18634 | 0.63 | 0.023 |             |               | UNKNOWN                                                           |
| Down at 6 hrs | A_65_P12505 | 0.63 | 0.010 |             |               | UNKNOWN                                                           |
| Down at 6 hrs | A_65_P19786 | 0.63 | 0.003 | XM_138266.1 |               | UNKNOWN                                                           |
| Down at 6 hrs | A_65_P11588 | 0.63 | 0.011 |             | D5Ertd683e    | UBIQUITIN CONJUGATING ENZYME 7 INTERACTING PROTEIN 1 (TRIAD3 PROT |
| Down at 6 hrs | A_65_P15130 | 0.63 | 0.003 | XM_181335.1 |               | UNKNOWN                                                           |
| Down at 6 hrs | A_65_P19957 | 0.63 | 0.035 |             | Gnai1         | UNKNOWN                                                           |
| Down at 6 hrs | A_65_P11086 | 0.63 | 0.017 |             | AI841987      | DIACYLGLYCEROL KINASE, DELTA EC 2.7.1.107 DIGLYCERIDE KINASE DGK  |
| Down at 6 hrs | A_65_P13908 | 0.63 | 0.026 |             |               | Intronic in U038091                                               |
| Down at 6 hrs | A_65_P19196 | 0.62 | 0.015 |             |               | Intronic in U003569                                               |
| Down at 6 hrs | A_65_P19609 | 0.62 | 0.039 | AJ237846.1  |               | UNKNOWN                                                           |
| Down at 6 hrs | A_65_P19210 | 0.62 | 0.007 |             |               | UNKNOWN                                                           |
| Down at 6 hrs | A_65_P11863 | 0.62 | 0.012 | XM_135623.1 |               | hypothetical RNI-like structure containing protein                |
| Down at 6 hrs | A_65_P19405 | 0.62 | 0.024 |             |               | hypothetical RNA-binding region RNP-1 (RNA recognition motif) con |
| Down at 6 hrs | A_65_P09016 | 0.62 | 0.014 |             | AI451450      | UNKNOWN                                                           |
| Down at 6 hrs | A_65_P15296 | 0.62 | 0.014 |             |               | Intronic in U015959                                               |
| Down at 6 hrs | A_65_P19384 | 0.62 | 0.019 |             |               | Intronic in U043516                                               |
| Down at 6 hrs | A_65_P17987 | 0.62 | 0.010 | NM_019643.1 | Tera-pending  | Mus musculus teratocarcinoma expressed, serine rich (Tera-pending |
| Down at 6 hrs | A_65_P19241 | 0.62 | 0.037 |             |               | similar to CDNA FLJ12855 FIS, CLONE NT2RP2003506, WEAKLY SIMILAR  |
| Down at 6 hrs | A_65_P19294 | 0.62 | 0.020 |             |               | UNKNOWN                                                           |
| Down at 6 hrs | A_65_P11765 | 0.62 | 0.013 |             | Cdk4          | Mus musculus RIKEN cDNA 2700085A14 gene (2700085A14Rik), mRNA     |
| Down at 6 hrs | A_65_P20340 | 0.62 | 0.035 |             |               | UNKNOWN                                                           |
| Down at 6 hrs | A_65_P18717 | 0.62 | 0.027 | NM_021466.1 | Taf1a         | Mus musculus TATA box binding protein (Tbp)-associated factor, RN |
| Down at 6 hrs | A_65_P12143 | 0.61 | 0.047 |             |               | Intronic in U022811                                               |
| Down at 6 hrs | A_65_P19152 | 0.61 | 0.027 | XM_128010.2 | 1500031N24Rik | Mus musculus RIKEN cDNA 2610029D06 gene (2610029D06Rik), mRNA     |
| Down at 6 hrs | A_65_P20078 | 0.61 | 0.016 |             |               | UNKNOWN                                                           |
| Down at 6 hrs | A_65_P07915 | 0.61 | 0.050 | NM_026443.1 | 1700020C11Rik | Mus musculus RIKEN cDNA 2610507A21 gene (2610507A21Rik), mRNA     |
| Down at 6 hrs | A_65_P11334 | 0.61 | 0.011 | NM_017635.1 | MGC18702      | CGI-85 PROTEIN homolog [Homo sapiens]                             |
| Down at 6 hrs | A_65_P12231 | 0.61 | 0.002 |             | D4ErtD628e    | Intronic in U024940                                               |
| Down at 6 hrs | A_65_P18365 | 0.61 | 0.014 | NM_054052.1 | B3gnT5        | Mus musculus UDP-GlcNAc:betaGal beta-1,3-N-acetylglucosaminyltran |
| Down at 6 hrs | A_65_P20235 | 0.61 | 0.020 | NM_011123.1 | P1p           | Mus musculus proteolipid protein (myelin) (P1p), mRNA             |
| Down at 6 hrs | A_65_P09482 | 0.61 | 0.026 |             | 4632434I11Rik | UNKNOWN                                                           |
| Down at 6 hrs | A_65_P17981 | 0.61 | 0.024 | BC037045.1  | Lztf1         | Mus musculus leucine zipper transcription factor-like 1 (Lztf1),  |



|               |             |      |       |             |               |                                                                   |
|---------------|-------------|------|-------|-------------|---------------|-------------------------------------------------------------------|
| Down at 6 hrs | A_65_P17969 | 0.56 | 0.035 |             |               | UNKNOWN                                                           |
| Down at 6 hrs | A_65_P19579 | 0.56 | 0.039 | NM_010938.1 | Nrf1          | Mus musculus nuclear respiratory factor 1 (Nrf1), mRNA            |
| Down at 6 hrs | A_65_P18462 | 0.56 | 0.032 |             |               | UNKNOWN                                                           |
| Down at 6 hrs | A_65_P19662 | 0.56 | 0.010 |             |               | UNKNOWN                                                           |
| Down at 6 hrs | A_65_P18063 | 0.56 | 0.007 | NM_172713.1 | 4931421J16    | HYPOTHETICAL 23.0 KDA PROTEIN (FRAGMENT). [Source:SPTREMBL;Acc:Q9 |
| Down at 6 hrs | A_65_P20579 | 0.55 | 0.013 | XM_148690.1 | E330017A01    | hypothetical Ferritin-like structure containing protein           |
| Down at 6 hrs | A_65_P19559 | 0.55 | 0.044 |             | LOC217449     | SIMILAR TO CGI-87 PROTEIN (FRAGMENT). [Source:SPTREMBL;Acc:Q99LT4 |
| Down at 6 hrs | A_65_P19973 | 0.55 | 0.019 |             |               | UNKNOWN                                                           |
| Down at 6 hrs | A_65_P13314 | 0.55 | 0.002 |             |               | UNKNOWN                                                           |
| Down at 6 hrs | A_65_P19199 | 0.55 | 0.009 | AF367720.1  | Lrp1          | Mus musculus low density lipoprotein receptor-related protein 1 ( |
| Down at 6 hrs | A_65_P19335 | 0.55 | 0.018 |             |               | hypothetical FAD/NAD(P)-binding domain structure containing prote |
| Down at 6 hrs | A_65_P12554 | 0.55 | 0.046 |             | 3110021P21Rik | RSLY1P homolog [Rattus norvegicus]                                |
| Down at 6 hrs | A_65_P17961 | 0.55 | 0.012 |             | 3110001N18Rik | 60S RIBOSOMAL PROTEIN                                             |
| Down at 6 hrs | A_65_P19218 | 0.55 | 0.038 | NM_138590.1 | D4Wsu132e     | Mus musculus DNA segment, Chr 4, Wayne State University 132, expr |
| Down at 6 hrs | A_65_P11684 | 0.54 | 0.029 |             |               | UNKNOWN                                                           |
| Down at 6 hrs | A_65_P17427 | 0.54 | 0.026 | XM_157155.1 |               | Intronic in U018368                                               |
| Down at 6 hrs | A_65_P20480 | 0.54 | 0.023 | BC030297.1  | Lgals4        | Mus musculus lectin, galactose binding, soluble 6 (Lgals6), mRNA  |
| Down at 6 hrs | A_65_P12601 | 0.54 | 0.019 |             |               | UNKNOWN                                                           |
| Down at 6 hrs | A_65_P16176 | 0.54 | 0.011 |             |               | UNKNOWN                                                           |
| Down at 6 hrs | A_65_P19998 | 0.54 | 0.044 |             | BC031407      | Mus musculus cDNA sequence BC031407 (BC031407), mRNA              |
| Down at 6 hrs | A_65_P17593 | 0.54 | 0.040 | NM_020587.1 | Sfrs4         | Mus musculus splicing factor, arginine/serine-rich 4 (SRp75) (Sfr |
| Down at 6 hrs | A_65_P19863 | 0.54 | 0.041 |             | Adams4        | ADAMTS EC 3.4.24.- A DISINTEGRIN AND METALLOPROTEINASE WITH THROM |
| Down at 6 hrs | A_65_P15769 | 0.54 | 0.019 |             |               | Intronic in U034908                                               |
| Down at 6 hrs | A_65_P12046 | 0.53 | 0.048 |             |               | REPEAT-SEQUENCE                                                   |
| Down at 6 hrs | A_65_P18670 | 0.53 | 0.022 |             |               | UNKNOWN                                                           |
| Down at 6 hrs | A_65_P07822 | 0.53 | 0.020 |             | Lnx1          | Mus musculus RIKEN cDNA 1300019H17 gene (1300019H17Rik), mRNA     |
| Down at 6 hrs | A_65_P16527 | 0.53 | 0.021 |             |               | UNKNOWN                                                           |
| Down at 6 hrs | A_65_P17520 | 0.53 | 0.034 |             |               | Intronic in U018704                                               |
| Down at 6 hrs | A_65_P17803 | 0.53 | 0.040 |             | Ate1          | Mus musculus arginine-tRNA-protein transferase 1 (Ate1), mRNA     |
| Down at 6 hrs | A_65_P18397 | 0.53 | 0.036 | XM_132971.1 | Itpr5         | Mus musculus inositol 1,4,5-triphosphate receptor 2 (Itpr2), mRNA |
| Down at 6 hrs | A_65_P17890 | 0.53 | 0.036 | BC025644.1  | 2610007E11Rik | Mus musculus RIKEN cDNA 2610007E11 gene (2610007E11Rik), mRNA     |
| Down at 6 hrs | A_65_P19333 | 0.53 | 0.017 | XM_128848.1 | 2610007A16Rik | Intronic in U038525                                               |
| Down at 6 hrs | A_65_P19880 | 0.53 | 0.026 |             |               | UNKNOWN                                                           |
| Down at 6 hrs | A_65_P17926 | 0.53 | 0.013 | AK020134.1  | Ramp2         | receptor (calcitonin) activity modifying protein 2                |
| Down at 6 hrs | A_65_P20348 | 0.53 | 0.028 | XM_131928.2 | LOC231051     | MLL3-LIKE PROTEIN (FRAGMENT). [Source:SPTREMBL;Acc:Q923H5]        |
| Down at 6 hrs | A_65_P09963 | 0.52 | 0.032 |             |               | UNKNOWN                                                           |
| Down at 6 hrs | A_65_P14751 | 0.52 | 0.050 | NM_145976.1 | MGC37193      | Mus musculus hypothetical protein MGC37193 (MGC37193), mRNA       |
| Down at 6 hrs | A_65_P17918 | 0.52 | 0.040 |             |               | REPEAT-SEQUENCE                                                   |
| Down at 6 hrs | A_65_P18566 | 0.52 | 0.038 |             |               | REPEAT-SEQUENCE                                                   |
| Down at 6 hrs | A_65_P17817 | 0.52 | 0.035 | XM_135269.1 |               | Mus musculus similar to CC chemokine receptor-5; heterotrimeric G |
| Down at 6 hrs | A_65_P11930 | 0.52 | 0.035 |             |               | UNKNOWN                                                           |
| Down at 6 hrs | A_65_P17611 | 0.52 | 0.005 |             |               | Intronic in U011387                                               |
| Down at 6 hrs | A_65_P13738 | 0.52 | 0.046 | NM_031778.1 | Kcns3         | VOLTAGE GATED POTASSIUM CHANNEL PROTEIN KV2                       |
| Down at 6 hrs | A_65_P13457 | 0.52 | 0.006 | XM_126173.2 | 4833420N02Rik | similar to CDNA FLJ10581 FIS, CLONE NT2RP2003543, WEAKLY SIMILAR  |
| Down at 6 hrs | A_65_P15788 | 0.52 | 0.024 |             |               | Intronic in U043056                                               |
| Down at 6 hrs | A_65_P17971 | 0.52 | 0.035 |             | 4833412C19Rik | Mus musculus RIKEN cDNA 4833412C19 gene (4833412C19Rik), mRNA     |
| Down at 6 hrs | A_65_P18840 | 0.52 | 0.002 |             |               | UNKNOWN                                                           |
| Down at 6 hrs | A_65_P19867 | 0.52 | 0.004 |             |               | Intronic in U028909                                               |
| Down at 6 hrs | A_65_P14752 | 0.52 | 0.036 | NM_144530.1 | 5730454B08Rik | Mus musculus RIKEN cDNA 5730454B08 gene (5730454B08Rik), mRNA     |
| Down at 6 hrs | A_65_P18548 | 0.52 | 0.020 | XM_134341.2 | LOC234725     | HYPOTHETICAL 63.8 KDA PROTEIN (FRAGMENT). [Source:SPTREMBL;Acc:Q9 |
| Down at 6 hrs | A_65_P18580 | 0.51 | 0.012 |             | D18Ert693e    | UNKNOWN                                                           |
| Down at 6 hrs | A_65_P17907 | 0.51 | 0.038 |             |               | UNKNOWN                                                           |
| Down at 6 hrs | A_65_P17411 | 0.51 | 0.001 |             | AI427066      | Mus musculus spermine synthase (Sms), mRNA                        |
| Down at 6 hrs | A_65_P19021 | 0.51 | 0.024 |             | D9Ert6788e    | Intronic in U031449                                               |
| Down at 6 hrs | A_65_P01472 | 0.51 | 0.037 |             |               | UNKNOWN                                                           |
| Down at 6 hrs | A_65_P18242 | 0.51 | 0.008 | NM_009843.1 | Cd152         | Mus musculus CD152 antigen (Cd152), mRNA                          |
| Down at 6 hrs | A_65_P17674 | 0.50 | 0.028 | XM_134599.1 | 1110031E24Rik | ZINC FINGER PROTEIN                                               |
| Down at 6 hrs | A_65_P18913 | 0.50 | 0.041 |             | Smcx          | Mus musculus selected mouse cDNA on the X (Smcx), mRNA            |

|               |             |      |       |             |               |                                                                   |
|---------------|-------------|------|-------|-------------|---------------|-------------------------------------------------------------------|
| Down at 6 hrs | A_65_P19282 | 0.50 | 0.008 |             |               | UNKNOWN                                                           |
| Down at 6 hrs | A_65_P19695 | 0.50 | 0.018 | NM_028184.1 | 2210010N10Rik | Mus musculus RIKEN cDNA 2210010N10 gene (2210010N10Rik), mRNA     |
| Down at 6 hrs | A_65_P17401 | 0.50 | 0.036 |             |               | UNKNOWN                                                           |
| Down at 6 hrs | A_65_P19899 | 0.50 | 0.045 | XM_133545.2 | 5430400N05Rik | ZINC FINGER PROTEIN                                               |
| Down at 6 hrs | A_65_P14355 | 0.50 | 0.015 |             | C81489        | UNKNOWN                                                           |
| Down at 6 hrs | A_65_P19481 | 0.50 | 0.006 |             | MGC41284      | Mus musculus interferon regulatory factor 6 (Irf6), mRNA          |
| Down at 6 hrs | A_65_P18066 | 0.50 | 0.029 | XM_129968.1 | A1836256      | HYPOTHETICAL 43.6 KDA PROTEIN (FRAGMENT). [Source:SPTREMBL;Acc:Q9 |
| Down at 6 hrs | A_65_P09425 | 0.50 | 0.010 | BC030010.1  | Eps8          | Mus musculus epidermal growth factor receptor pathway substrate 8 |
| Down at 6 hrs | A_65_P19968 | 0.49 | 0.010 | BC037664.1  | Plagl2        | Mus musculus pleiomorphic adenoma gene-like 2 (Plagl2), mRNA      |
| Down at 6 hrs | A_65_P16566 | 0.49 | 0.002 |             |               | UNKNOWN                                                           |
| Down at 6 hrs | A_65_P19283 | 0.49 | 0.028 | AK003394.1  | 111003P13Rik  | Mus musculus guanine nucleotide binding protein (G protein), gamm |
| Down at 6 hrs | A_65_P20756 | 0.49 | 0.010 | NM_053199.1 | Necl1-pending | Mus musculus nectin-like 1 (Necl1-pending), mRNA                  |
| Down at 6 hrs | A_65_P18630 | 0.49 | 0.049 | XM_131216.1 | Cryz          | QUINONE OXIDOREDUCTASE (EC 1.6.5.5) (NADPH:QUINONE REDUCTASE) (ZE |
| Down at 6 hrs | A_65_P19884 | 0.49 | 0.041 |             |               | Intronic in U025494                                               |
| Down at 6 hrs | A_65_P17878 | 0.49 | 0.002 |             |               | Intronic in U017796                                               |
| Down at 6 hrs | A_65_P20540 | 0.49 | 0.041 | NM_144864.1 | 2610007E11Rik | Mus musculus RIKEN cDNA 2610007E11 gene (2610007E11Rik), mRNA     |
| Down at 6 hrs | A_65_P19114 | 0.48 | 0.027 |             | AA673488      | Mus musculus expressed sequence AA673488 (AA673488), mRNA         |
| Down at 6 hrs | A_65_P19297 | 0.48 | 0.022 |             |               | Intronic in U012498                                               |
| Down at 6 hrs | A_65_P16858 | 0.48 | 0.015 |             | D18Ert613e    | Intronic in U038375                                               |
| Down at 6 hrs | A_65_P19663 | 0.48 | 0.008 | AF195850.1  |               | Mus musculus mitogen-activated protein kinase p38 beta mRNA, part |
| Down at 6 hrs | A_65_P14875 | 0.48 | 0.049 |             | C77494        | UNKNOWN                                                           |
| Down at 6 hrs | A_65_P16822 | 0.48 | 0.028 |             | C85918        | Intronic in U033898                                               |
| Down at 6 hrs | A_65_P19197 | 0.48 | 0.005 |             | 4930556B16Rik | UNKNOWN                                                           |
| Down at 6 hrs | A_65_P20049 | 0.48 | 0.045 | NM_007928.1 | Mark2         | Mus musculus ELKL motif kinase (Emk), mRNA                        |
| Down at 6 hrs | A_65_P19701 | 0.48 | 0.004 |             | C77218        | UNKNOWN                                                           |
| Down at 6 hrs | A_65_P20225 | 0.48 | 0.026 |             | 5430433H21Rik | Mus musculus RAS p21 protein activator 2 (Rasa2), mRNA            |
| Down at 6 hrs | A_65_P19764 | 0.48 | 0.017 | BC023202.1  | 2810049G06Rik | Mus musculus RIKEN cDNA 2810049G06 gene (2810049G06Rik), mRNA     |
| Down at 6 hrs | A_65_P19100 | 0.48 | 0.028 |             |               | UNKNOWN                                                           |
| Down at 6 hrs | A_65_P19509 | 0.47 | 0.025 |             | AW050376      | UNKNOWN                                                           |
| Down at 6 hrs | A_65_P19746 | 0.47 | 0.044 |             |               | UNKNOWN                                                           |
| Down at 6 hrs | A_65_P20133 | 0.47 | 0.027 | NM_138870.1 | Tfpt          | Mus musculus TCF3 (E2A) fusion partner (Tfpt), mRNA               |
| Down at 6 hrs | A_65_P13929 | 0.47 | 0.026 |             |               | similar to KIAA0447 PROTEIN (FRAGMENT) [Homo sapiens]             |
| Down at 6 hrs | A_65_P19193 | 0.47 | 0.036 |             | C80893        | UNKNOWN                                                           |
| Down at 6 hrs | A_65_P20075 | 0.47 | 0.029 | NM_009462.1 | Uchrp         | Mus musculus ubiquitin c-terminal hydrolase related polypeptide   |
| Down at 6 hrs | A_65_P20322 | 0.47 | 0.032 | NM_028776.2 | 1200016D23Rik | Mus musculus RIKEN cDNA 1200016D23 gene (1200016D23Rik), mRNA     |
| Down at 6 hrs | A_65_P15891 | 0.47 | 0.018 | NM_133791.1 | D8Ert594e     | Mus musculus DNA segment, Chr 8, ERATO Doi 594, expressed (D8Ert  |
| Down at 6 hrs | A_65_P20517 | 0.47 | 0.017 | NM_007680.1 | Ephb6         | Mus musculus Eph receptor B6 (Ephb6), mRNA                        |
| Down at 6 hrs | A_65_P10428 | 0.46 | 0.012 |             |               | UNKNOWN                                                           |
| Down at 6 hrs | A_65_P18833 | 0.46 | 0.014 | XM_132018.2 |               | Mus musculus similar to gene with multiple splice variants near H |
| Down at 6 hrs | A_65_P19907 | 0.46 | 0.002 |             |               | Intronic in U022672                                               |
| Down at 6 hrs | A_65_P19106 | 0.46 | 0.013 | XM_130858.1 | 2810423E13Rik | UNKNOWN                                                           |
| Down at 6 hrs | A_65_P19302 | 0.46 | 0.045 |             |               | UNKNOWN                                                           |
| Down at 6 hrs | A_65_P18531 | 0.46 | 0.028 |             | Mta3          | UNKNOWN                                                           |
| Down at 6 hrs | A_65_P18747 | 0.46 | 0.005 | XM_138081.2 | AW124614      | similar to BREAKPOINT CLUSTER REGION PROTEIN 2 (FRAGMENT) [Homo s |
| Down at 6 hrs | A_65_P19608 | 0.46 | 0.023 |             | C79300        | Intronic in U015265                                               |
| Down at 6 hrs | A_65_P18779 | 0.46 | 0.048 |             | 5630401J11Rik | Mus musculus RIKEN cDNA 5630401J11 gene (5630401J11Rik), mRNA     |
| Down at 6 hrs | A_65_P15020 | 0.45 | 0.044 |             |               | UNKNOWN                                                           |
| Down at 6 hrs | A_65_P19999 | 0.45 | 0.027 | NM_139057.1 |               | ADAMTS EC 3.4.24.- A DISINTEGRIN AND METALLOPROTEINASE WITH THROM |
| Down at 6 hrs | A_65_P17905 | 0.45 | 0.021 | NM_021315.1 | AF233884      | Mus musculus cDNA sequence AF233884 (AF233884), mRNA              |
| Down at 6 hrs | A_65_P18278 | 0.45 | 0.023 | XM_125704.2 | 2610028H24Rik | weakly similar to PROTEIN C21ORF58 [Homo sapiens]                 |
| Down at 6 hrs | A_65_P14824 | 0.45 | 0.041 |             | D1Ert83e      | UNKNOWN                                                           |
| Down at 6 hrs | A_65_P18914 | 0.45 | 0.009 | NM_026824.1 | 1110032N12Rik | Mus musculus RIKEN cDNA 1110032N12 gene (1110032N12Rik), mRNA     |
| Down at 6 hrs | A_65_P18190 | 0.45 | 0.035 |             |               | UNKNOWN                                                           |
| Down at 6 hrs | A_65_P17977 | 0.44 | 0.016 |             | D13Ert42e     | Intronic in U014782                                               |
| Down at 6 hrs | A_65_P19948 | 0.44 | 0.032 |             |               | Similar to: Mus musculus, Similar to zinc finger protein 52, clon |
| Down at 6 hrs | A_65_P17869 | 0.44 | 0.026 |             | 2310066N05Rik | Intronic in U024741                                               |
| Down at 6 hrs | A_65_P19037 | 0.44 | 0.033 |             | 1500016H10Rik | Intronic in U033633                                               |
| Down at 6 hrs | A_65_P19590 | 0.44 | 0.015 | XM_149030.1 | AW554518      | Similar to: Mus musculus LOC329164 (LOC329164), mRNA              |

|               |             |      |       |  |       |  |                                                                   |
|---------------|-------------|------|-------|--|-------|--|-------------------------------------------------------------------|
| Down at 6 hrs | A_65_P16856 | 0.43 | 0.023 |  |       |  | Intronic in U029271                                               |
| Down at 6 hrs | A_65_P19013 | 0.43 | 0.047 |  |       |  | Intronic in U043754                                               |
| Down at 6 hrs | A_65_P19803 | 0.43 | 0.005 |  |       |  | Mus musculus similar to ret finger protein-like 4; DNA segment, C |
| Down at 6 hrs | A_65_P17868 | 0.43 | 0.019 |  |       |  | UNKNOWN                                                           |
| Down at 6 hrs | A_65_P19191 | 0.43 | 0.041 |  |       |  | PHOSPHOLIPASE D1 (EC 3.1.4.4) (PLD 1) (CHOLINE PHOSPHATASE 1) (PH |
| Down at 6 hrs | A_65_P17960 | 0.43 | 0.009 |  |       |  | Similar to: Mus musculus LOC235723 (LOC235723), mRNA              |
| Down at 6 hrs | A_65_P17612 | 0.43 | 0.038 |  |       |  | Intronic in U035818                                               |
| Down at 6 hrs | A_65_P19427 | 0.43 | 0.007 |  |       |  | Mus musculus RIKEN cDNA A930016P21 gene (A930016P21Rik), mRNA     |
| Down at 6 hrs | A_65_P19556 | 0.43 | 0.047 |  |       |  | UNKNOWN                                                           |
| Down at 6 hrs | A_65_P17318 | 0.43 | 0.027 |  |       |  | UNKNOWN PROTEIN (FRAGMENT). [Source:SPTREMBL;Acc:Q9JME5]          |
| Down at 6 hrs | A_65_P17484 | 0.42 | 0.019 |  |       |  | UNKNOWN                                                           |
| Down at 6 hrs | A_65_P16722 | 0.42 | 0.005 |  |       |  | UNKNOWN                                                           |
| Down at 6 hrs | A_65_P19846 | 0.42 | 0.011 |  |       |  | Intronic in U018735                                               |
| Down at 6 hrs | A_65_P12035 | 0.42 | 0.007 |  |       |  | REPEAT-SEQUENCE                                                   |
| Down at 6 hrs | A_65_P15293 | 0.42 | 0.027 |  |       |  | Mus musculus RIKEN cDNA 4930441E05 gene (4930441E05Rik), mRNA     |
| Down at 6 hrs | A_65_P20513 | 0.41 | 0.018 |  |       |  | Intronic in U025678                                               |
| Down at 6 hrs | A_65_P20223 | 0.41 | 0.036 |  |       |  | Intronic in U001642                                               |
| Down at 6 hrs | A_65_P18579 | 0.41 | 0.028 |  |       |  | UNKNOWN                                                           |
| Down at 6 hrs | A_65_P19810 | 0.41 | 0.030 |  |       |  | Intronic in U008155                                               |
| Down at 6 hrs | A_65_P18865 | 0.41 | 0.020 |  |       |  | Intronic in U002815                                               |
| Down at 6 hrs | A_65_P20160 | 0.41 | 0.021 |  |       |  | Intronic in U001332                                               |
| Down at 6 hrs | A_65_P17446 | 0.41 | 0.045 |  |       |  | UNKNOWN                                                           |
| Down at 6 hrs | A_65_P17889 | 0.41 | 0.033 |  |       |  | CELL DIVISION CYCLE 7-RELATED PROTEIN KINASE (EC 2.7.1.-) (CDC7-  |
| Down at 6 hrs | A_65_P17694 | 0.41 | 0.009 |  |       |  | UNKNOWN                                                           |
| Down at 6 hrs | A_65_P19604 | 0.40 | 0.044 |  |       |  | Intronic in U027660                                               |
| Down at 6 hrs | A_65_P15809 | 0.40 | 0.003 |  |       |  | UNKNOWN                                                           |
| Down at 6 hrs | A_65_P17605 | 0.40 | 0.011 |  |       |  | Mus musculus mitogen activated protein kinase kinase 1 (Map2k1),  |
| Down at 6 hrs | A_65_P18726 | 0.40 | 0.008 |  |       |  | UNKNOWN (PROTEIN FOR MGC:12151). [Source:SPTREMBL;Acc:Q922W9]     |
| Down at 6 hrs | A_65_P15766 | 0.40 | 0.021 |  |       |  | Intronic in U007058                                               |
| Down at 6 hrs | A_65_P20606 | 0.39 | 0.012 |  |       |  | ALKYLATED DNA REPAIR PROTEIN ALKB                                 |
| Down at 6 hrs | A_65_P15022 | 0.39 | 0.027 |  |       |  | RAB12, member RAS oncogene family. Possibly unspliced.            |
| Down at 6 hrs | A_65_P19153 | 0.39 | 0.005 |  |       |  | Mus musculus similar to hypothetical protein [Homo sapiens] (LOC2 |
| Down at 6 hrs | A_65_P18957 | 0.38 | 0.021 |  |       |  | Mus musculus NIMA (never in mitosis gene a)-related expressed kin |
| Down at 6 hrs | A_65_P17344 | 0.38 | 0.047 |  |       |  | UNKNOWN                                                           |
| Down at 6 hrs | A_65_P20201 | 0.38 | 0.041 |  |       |  | Intronic in U018853                                               |
| Down at 6 hrs | A_65_P18909 | 0.36 | 0.004 |  |       |  | UNKNOWN                                                           |
| Down at 6 hrs | A_65_P17812 | 0.36 | 0.015 |  |       |  | Mus musculus solute carrier family 27 (fatty acid transporter), m |
| Down at 6 hrs | A_65_P18919 | 0.36 | 0.028 |  |       |  | Similar to: Mus musculus 12 days embryo eyeball cDNA, RIKEN full- |
| Down at 6 hrs | A_65_P17721 | 0.34 | 0.043 |  |       |  | REPEAT-SEQUENCE                                                   |
| Down at 6 hrs | A_65_P18918 | 0.33 | 0.032 |  |       |  | UNKNOWN                                                           |
| Down at 6 hrs | A_65_P18974 | 0.33 | 0.016 |  |       |  | Mus musculus interferon (alpha and beta) receptor 1 (Ifnar1), mRN |
| Down at 6 hrs | A_65_P17805 | 0.33 | 0.046 |  |       |  | weakly similar to DC31 [Homo sapiens]                             |
| Down at 6 hrs | A_65_P13084 | 0.33 | 0.009 |  |       |  | REPEAT-SEQUENCE                                                   |
| Down at 6 hrs | A_65_P17901 | 0.32 | 0.016 |  |       |  | UNKNOWN                                                           |
| Down at 6 hrs | A_65_P18375 | 0.32 | 0.045 |  |       |  | hypothetical Immunoglobulin structure containing protein          |
| Down at 6 hrs | A_65_P19044 | 0.32 | 0.031 |  |       |  | UNKNOWN                                                           |
| Down at 6 hrs | A_65_P18756 | 0.31 | 0.019 |  |       |  | UNKNOWN                                                           |
| Down at 6 hrs | A_65_P18994 | 0.30 | 0.026 |  |       |  | UNKNOWN                                                           |
| Down at 6 hrs | A_65_P20281 | 0.28 | 0.043 |  |       |  | UNKNOWN                                                           |
| Down at 6 hrs | A_65_P20520 | 0.25 | 0.011 |  |       |  | Mus musculus RIKEN cDNA 0610040J01 gene (0610040J01Rik), mRNA     |
| Down at 6 hrs | A_65_P13264 | 0.23 | 0.032 |  |       |  | UNKNOWN                                                           |
| Up at 24 hrs  | A_65_P04290 |      | 4.60  |  | 0.003 |  | UNKNOWN                                                           |
| Up at 24 hrs  | A_65_P08304 |      | 4.30  |  | 0.016 |  | UNKNOWN                                                           |
| Up at 24 hrs  | A_65_P07296 |      | 4.21  |  | 0.045 |  | UNKNOWN                                                           |
| Up at 24 hrs  | A_65_P00812 |      | 4.11  |  | 0.011 |  | UNKNOWN                                                           |
| Up at 24 hrs  | A_65_P01409 |      | 3.99  |  | 0.003 |  | UNKNOWN                                                           |
| Up at 24 hrs  | A_65_P04189 |      | 3.95  |  | 0.002 |  | Mus musculus catenin delta 2 (Catnd2), mRNA                       |
| Up at 24 hrs  | A_65_P03308 |      | 3.94  |  | 0.017 |  | Intronic in U000752                                               |
|               |             |      |       |  |       |  | Intronic in U037061                                               |

|              |             |      |       |             |                      |                                                                   |
|--------------|-------------|------|-------|-------------|----------------------|-------------------------------------------------------------------|
| Up at 24 hrs | A_65_P03307 | 3.91 | 0.019 | XM_141372.2 | 5830467P10           | MITOGEN INDUCIBLE MIG                                             |
| Up at 24 hrs | A_65_P02144 | 3.91 | 0.040 |             | 4930402L05           | UNKNOWN                                                           |
| Up at 24 hrs | A_65_P00873 | 3.91 | 0.021 |             |                      | Intronic in U012369                                               |
| Up at 24 hrs | A_65_P08324 | 3.85 | 0.024 | XM_132160.1 |                      | Mus musculus LOC231423 (LOC231423), mRNA                          |
| Up at 24 hrs | A_65_P07538 | 3.83 | 0.004 |             | 5430416A05Rik        | Intronic in U041168                                               |
| Up at 24 hrs | A_65_P02382 | 3.83 | 0.004 |             |                      | UNKNOWN                                                           |
| Up at 24 hrs | A_65_P02405 | 3.80 | 0.009 |             |                      | weakly similar to CTCL TUMOR ANTIGEN SE70-2 (CUTANEOUS T-CELL LYM |
| Up at 24 hrs | A_65_P02590 | 3.78 | 0.011 | NM_172632.1 | A330097D03           | MITOGEN ACTIVATED PROTEIN KINASE 4 EC 2.7.1.- EXTRACELLULAR SIGNA |
| Up at 24 hrs | A_65_P01382 | 3.78 | 0.005 |             | 1700013B03Rik        | hypothetical Myb DNA binding domain/Myc-type, helix-loop-helix di |
| Up at 24 hrs | A_65_P06705 | 3.78 | 0.037 | NM_018769.1 | Dfna5h               | deafness, autosomal dominant 5 homolog (human). Possibly wrong st |
| Up at 24 hrs | A_65_P01341 | 3.77 | 0.006 |             |                      | UNKNOWN                                                           |
| Up at 24 hrs | A_65_P07630 | 3.74 | 0.003 |             |                      | Intronic in U026165                                               |
| Up at 24 hrs | A_65_P02863 | 3.71 | 0.000 |             |                      | UNKNOWN                                                           |
| Up at 24 hrs | A_65_P02773 | 3.71 | 0.005 |             | 0610007A03Rik        | UNKNOWN                                                           |
| Up at 24 hrs | A_65_P02493 | 3.67 | 0.005 |             |                      | UNKNOWN                                                           |
| Up at 24 hrs | A_65_P02830 | 3.60 | 0.018 | BC028644.1  |                      | UNKNOWN                                                           |
| Up at 24 hrs | A_65_P03633 | 3.59 | 0.001 |             | AU022852             | UNKNOWN                                                           |
| Up at 24 hrs | A_65_P07354 | 3.59 | 0.000 |             |                      | Intronic in U043357                                               |
| Up at 24 hrs | A_65_P01288 | 3.58 | 0.027 |             |                      | UNKNOWN                                                           |
| Up at 24 hrs | A_65_P06702 | 3.58 | 0.020 |             |                      | Intronic in U033251                                               |
| Up at 24 hrs | A_65_P03317 | 3.55 | 0.004 |             |                      | Intronic in U021824                                               |
| Up at 24 hrs | A_65_P03235 | 3.55 | 0.002 |             | AA408396             | Intronic in U010915                                               |
| Up at 24 hrs | A_65_P07437 | 3.52 | 0.005 |             |                      | UNKNOWN                                                           |
| Up at 24 hrs | A_65_P05907 | 3.50 | 0.002 |             |                      | Intronic in U024825                                               |
| Up at 24 hrs | A_65_P07024 | 3.50 | 0.048 |             |                      | UNKNOWN                                                           |
| Up at 24 hrs | A_65_P02100 | 3.49 | 0.006 |             |                      | Intronic in U025372                                               |
| Up at 24 hrs | A_65_P05355 | 3.49 | 0.032 |             |                      | UNKNOWN                                                           |
| Up at 24 hrs | A_65_P03448 | 3.47 | 0.005 |             |                      | Intronic in U013134                                               |
| Up at 24 hrs | A_65_P02172 | 3.43 | 0.007 |             |                      | Intronic in U034992                                               |
| Up at 24 hrs | A_65_P03340 | 3.42 | 0.006 |             | D15Ert430e           | Intronic in U036682                                               |
| Up at 24 hrs | A_65_P05369 | 3.40 | 0.012 |             |                      | Similar to: Mus musculus similar to Airway trypsin-like protease  |
| Up at 24 hrs | A_65_P07252 | 3.40 | 0.010 | XM_126577.2 | Map2k6               | DUAL SPECIFICITY MITOGEN-ACTIVATED PROTEIN KINASE KINASE 6 (EC 2. |
| Up at 24 hrs | A_65_P08247 | 3.39 | 0.033 |             |                      | UNKNOWN                                                           |
| Up at 24 hrs | A_65_P05109 | 3.37 | 0.018 |             | D8Ert580e            | Mus musculus par-3 (partitioning defective 3) homolog (C. elegans |
| Up at 24 hrs | A_65_P02072 | 3.35 | 0.014 |             | C78692               | Intronic in U025480                                               |
| Up at 24 hrs | A_65_P02074 | 3.35 | 0.010 |             |                      | UNKNOWN                                                           |
| Up at 24 hrs | A_65_P03734 | 3.35 | 0.026 |             | AU015903             | Mus musculus muskelin 1, intracellular mediator containing kelch  |
| Up at 24 hrs | A_65_P06854 | 3.34 | 0.033 |             |                      | UNKNOWN                                                           |
| Up at 24 hrs | A_65_P02932 | 3.33 | 0.029 |             | Epn2                 | Mus musculus epsin 2 (Epn2), mRNA                                 |
| Up at 24 hrs | A_65_P07284 | 3.32 | 0.014 |             | C78802               | UNKNOWN                                                           |
| Up at 24 hrs | A_65_P02709 | 3.30 | 0.018 |             |                      | Intronic in U026287                                               |
| Up at 24 hrs | A_65_P10134 | 3.30 | 0.008 |             |                      | UNKNOWN                                                           |
| Up at 24 hrs | A_65_P05269 | 3.30 | 0.027 |             |                      | Similar to: Mouse nucleolin gene                                  |
| Up at 24 hrs | A_65_P01088 | 3.28 | 0.021 |             |                      | Intronic in U043167                                               |
| Up at 24 hrs | A_65_P04771 | 3.28 | 0.007 |             |                      | UNKNOWN                                                           |
| Up at 24 hrs | A_65_P02020 | 3.28 | 0.000 |             | C86287               | Intronic in U011029                                               |
| Up at 24 hrs | A_65_P02365 | 3.27 | 0.001 |             |                      | Intronic in U005267                                               |
| Up at 24 hrs | A_65_P02768 | 3.27 | 0.003 |             |                      | UNKNOWN                                                           |
| Up at 24 hrs | A_65_P06032 | 3.27 | 0.016 |             |                      | Intronic in U029617                                               |
| Up at 24 hrs | A_65_P01133 | 3.27 | 0.021 |             | D13Wsu123e           | Mus musculus DNA segment, Chr 13, Wayne State University 123, exp |
| Up at 24 hrs | A_65_P06926 | 3.27 | 0.031 | AB034243.1  | Gata6                | Intronic in U038208                                               |
| Up at 24 hrs | A_65_P08700 | 3.26 | 0.019 |             |                      | Similar to: Mus musculus 16 days embryo head cDNA, RIKEN full-len |
| Up at 24 hrs | A_65_P07184 | 3.24 | 0.046 |             | AU017263             | Intronic in U014267                                               |
| Up at 24 hrs | A_65_P04517 | 3.21 | 0.034 | NM_133653.1 | Mat1a                | Mus musculus methionine adenosyltransferase 1, alpha (Mat1a), mRN |
| Up at 24 hrs | A_65_P04491 | 3.20 | 0.033 |             |                      | Intronic in U028706                                               |
| Up at 24 hrs | A_65_P02615 | 3.19 | 0.022 |             |                      | UNKNOWN                                                           |
| Up at 24 hrs | A_65_P01260 | 3.19 | 0.023 |             | 5730513123Rik;Znf212 | Mus musculus Zinc finger protein 212 (Znf212), mRNA               |
| Up at 24 hrs | A_65_P00902 | 3.19 | 0.009 | NM_009421.1 | Traf1                | Mus musculus Tnf receptor-associated factor 1 (Traf1), mRNA       |



|              |             |      |                   |               |                                                                    |
|--------------|-------------|------|-------------------|---------------|--------------------------------------------------------------------|
| Up at 24 hrs | A_65_P02202 | 3.19 | 0.005             |               | UNKNOWN                                                            |
| Up at 24 hrs | A_65_P01588 | 3.18 | 0.029 NM_021432.1 | 1110020M21Rik | Mus musculus RIKEN cDNA 1110020M21 gene (1110020M21Rik), mRNA      |
| Up at 24 hrs | A_65_P03695 | 3.18 | 0.043             |               | Intronic in U011422                                                |
| Up at 24 hrs | A_65_P04954 | 3.17 | 0.010 XM_152388.1 |               | UNKNOWN                                                            |
| Up at 24 hrs | A_65_P06003 | 3.16 | 0.001             |               | UNKNOWN                                                            |
| Up at 24 hrs | A_65_P07748 | 3.15 | 0.015             |               | Intronic in U016148                                                |
| Up at 24 hrs | A_65_P04006 | 3.14 | 0.022             |               | Intronic in U022311                                                |
| Up at 24 hrs | A_65_P03158 | 3.13 | 0.002             |               | Intronic in U024061                                                |
| Up at 24 hrs | A_65_P06190 | 3.13 | 0.002             |               | Intronic in U016902                                                |
| Up at 24 hrs | A_65_P02380 | 3.12 | 0.008             |               | UNKNOWN                                                            |
| Up at 24 hrs | A_65_P02996 | 3.12 | 0.023 NM_019971.1 | Pdgfc         | Mus musculus platelet-derived growth factor, C polypeptide (Pdgfc) |
| Up at 24 hrs | A_65_P02026 | 3.12 | 0.033             |               | Intronic in U027687                                                |
| Up at 24 hrs | A_65_P03559 | 3.11 | 0.000             |               | Intronic in U031429                                                |
| Up at 24 hrs | A_65_P03716 | 3.09 | 0.010 NM_023266.1 | 1200003I07Rik | Mus musculus RIKEN cDNA 1200003I07 gene (1200003I07Rik), mRNA      |
| Up at 24 hrs | A_65_P00750 | 3.09 | 0.025             |               | UNKNOWN                                                            |
| Up at 24 hrs | A_65_P02078 | 3.07 | 0.024             |               | UNKNOWN                                                            |
| Up at 24 hrs | A_65_P03997 | 3.07 | 0.012             |               | UNKNOWN                                                            |
| Up at 24 hrs | A_65_P03225 | 3.07 | 0.040             |               | UNKNOWN                                                            |
| Up at 24 hrs | A_65_P01123 | 3.06 | 0.010             |               | Intronic in U015212                                                |
| Up at 24 hrs | A_65_P02176 | 3.06 | 0.011             | Usp3          | Mus musculus ubiquitin specific protease 3 (Usp3), mRNA            |
| Up at 24 hrs | A_65_P01012 | 3.05 | 0.031             |               | Intronic in U042079                                                |
| Up at 24 hrs | A_65_P08997 | 3.05 | 0.012             |               | UNKNOWN                                                            |
| Up at 24 hrs | A_65_P00626 | 3.04 | 0.020             | Ssbp2         | Mus musculus single-stranded DNA binding protein 2 (Ssbp2), mRNA   |
| Up at 24 hrs | A_65_P03982 | 3.04 | 0.041             |               | Intronic in U002460                                                |
| Up at 24 hrs | A_65_P01410 | 3.03 | 0.002             |               | UNKNOWN                                                            |
| Up at 24 hrs | A_65_P07641 | 3.01 | 0.001             | D17Erttd29e   | UNKNOWN                                                            |
| Up at 24 hrs | A_65_P01208 | 2.98 | 0.009             |               | UNKNOWN                                                            |
| Up at 24 hrs | A_65_P07614 | 2.98 | 0.008             |               | Intronic in U021526                                                |
| Up at 24 hrs | A_65_P03261 | 2.97 | 0.014             | AU020147      | UNKNOWN                                                            |
| Up at 24 hrs | A_65_P01750 | 2.97 | 0.000             |               | Intronic in U033775                                                |
| Up at 24 hrs | A_65_P03651 | 2.96 | 0.007             |               | Intronic in U028462                                                |
| Up at 24 hrs | A_65_P00953 | 2.96 | 0.020 BC028971.1  | 3110050O07Rik | Mus musculus maternally expressed gene 3 (Meg3), mRNA              |
| Up at 24 hrs | A_65_P09724 | 2.96 | 0.012             |               | Intronic in U017038                                                |
| Up at 24 hrs | A_65_P07434 | 2.96 | 0.020 BC037037.1  | 0710001G09Rik | GOLGI COMPLEX AUTOANTIGEN GOLGIN-97 (GOLGI AUTOANTIGEN, GOLGIN SU) |
| Up at 24 hrs | A_65_P06667 | 2.95 | 0.030 NM_026425.1 |               | UNKNOWN                                                            |
| Up at 24 hrs | A_65_P07890 | 2.95 | 0.019             |               | UNKNOWN                                                            |
| Up at 24 hrs | A_65_P10763 | 2.95 | 0.019             |               | UNKNOWN                                                            |
| Up at 24 hrs | A_65_P03766 | 2.94 | 0.045             |               | UNKNOWN                                                            |
| Up at 24 hrs | A_65_P06381 | 2.94 | 0.018             |               | Intronic in U038222                                                |
| Up at 24 hrs | A_65_P02393 | 2.93 | 0.020 BC004722.1  | App           | Unknown (protein for MGC:7901) [Mus musculus]                      |
| Up at 24 hrs | A_65_P02576 | 2.93 | 0.007 XM_137998.1 |               | Mus musculus similar to putative G protein-coupled receptor [Homo] |
| Up at 24 hrs | A_65_P01498 | 2.93 | 0.003             |               | UNKNOWN                                                            |
| Up at 24 hrs | A_65_P03279 | 2.93 | 0.036 BC027703.1  |               | UNKNOWN                                                            |
| Up at 24 hrs | A_65_P01622 | 2.92 | 0.029             |               | UNKNOWN                                                            |
| Up at 24 hrs | A_65_P04098 | 2.92 | 0.006             |               | Intronic in U004280                                                |
| Up at 24 hrs | A_65_P08895 | 2.92 | 0.034 XM_134370.2 | Hmgb21        | HIGH MOBILITY GROUP PROTEIN 2 LIKE 1 HMGBCG                        |
| Up at 24 hrs | A_65_P02762 | 2.92 | 0.008             | AU021871      | Mus musculus karyopherin (importin) alpha 4 (Kpna4), mRNA          |
| Up at 24 hrs | A_65_P01436 | 2.91 | 0.029             |               | HYPOTHETICAL 87.3 KDA PROTEIN homolog [Homo sapiens]               |
| Up at 24 hrs | A_65_P02326 | 2.91 | 0.018             |               | UNKNOWN                                                            |
| Up at 24 hrs | A_65_P02451 | 2.90 | 0.040             |               | UNKNOWN                                                            |
| Up at 24 hrs | A_65_P06532 | 2.89 | 0.034 XM_130361.1 |               | hypothetical TPR repeat containing protein                         |
| Up at 24 hrs | A_65_P02674 | 2.88 | 0.007             |               | UNKNOWN                                                            |
| Up at 24 hrs | A_65_P06785 | 2.88 | 0.033 AL627269.1  |               | UNKNOWN                                                            |
| Up at 24 hrs | A_65_P06879 | 2.88 | 0.014             |               | Intronic in U035756                                                |
| Up at 24 hrs | A_65_P00905 | 2.87 | 0.030             |               | Intronic in U026344                                                |
| Up at 24 hrs | A_65_P06260 | 2.87 | 0.031             |               | UNKNOWN                                                            |
| Up at 24 hrs | A_65_P01475 | 2.86 | 0.003             | D10Erttd533e  | UNKNOWN                                                            |
| Up at 24 hrs | A_65_P03919 | 2.86 | 0.037             |               | REPEAT-SEQUENCE                                                    |

|              |             |      |       |             |                     |                                                                   |
|--------------|-------------|------|-------|-------------|---------------------|-------------------------------------------------------------------|
| Up at 24 hrs | A_65_P00602 | 2.85 | 0.026 |             | UNKNOWN             |                                                                   |
| Up at 24 hrs | A_65_P04185 | 2.85 | 0.006 |             | Intronic in U001363 |                                                                   |
| Up at 24 hrs | A_65_P07421 | 2.85 | 0.013 | XM_128828.2 | Gata6               | TRANSCRIPTION FACTOR GATA-6 (GATA BINDING FACTOR-6). [Source:SWIS |
| Up at 24 hrs | A_65_P08130 | 2.84 | 0.044 |             | UNKNOWN             |                                                                   |
| Up at 24 hrs | A_65_P03313 | 2.84 | 0.032 | XM_126874.1 | C80098              | LAMININ BETA-1 CHAIN PRECURSOR (LAMININ B1 CHAIN). [Source:SWISSP |
| Up at 24 hrs | A_65_P03822 | 2.84 | 0.000 |             | UNKNOWN             |                                                                   |
| Up at 24 hrs | A_65_P03346 | 2.83 | 0.027 | XM_125546.2 | 4833419J07Rik       | MACGAP homolog [Homo sapiens]                                     |
| Up at 24 hrs | A_65_P03326 | 2.83 | 0.007 |             | D7Erd715e           | DNA segment, Chr 7, ERATO Doi 715, expressed                      |
| Up at 24 hrs | A_65_P03422 | 2.83 | 0.010 |             | AU045094            | UNKNOWN                                                           |
| Up at 24 hrs | A_65_P13802 | 2.82 | 0.037 |             | Plod2               | Mus musculus procollagen lysine, 2-oxoglutarate 5-dioxygenase 2 ( |
| Up at 24 hrs | A_65_P01325 | 2.82 | 0.014 |             |                     | UNKNOWN                                                           |
| Up at 24 hrs | A_65_P06518 | 2.82 | 0.007 |             |                     | UNKNOWN                                                           |
| Up at 24 hrs | A_65_P07037 | 2.82 | 0.029 |             |                     | Similar to: Mus musculus adult male medulla oblongata cDNA, RIKEN |
| Up at 24 hrs | A_65_P07008 | 2.81 | 0.032 | BC019692.1  |                     | hypothetical jmjC domain containing protein                       |
| Up at 24 hrs | A_65_P06100 | 2.81 | 0.022 | NM_027492.1 | 5730533P17Rik       | Mus musculus RIKEN cDNA 5730533P17 gene (5730533P17Rik), mRNA     |
| Up at 24 hrs | A_65_P01902 | 2.81 | 0.019 | AK014604.1  | 4632432E15Rik       | Mus musculus solute carrier family 38, member 1 (Slc38a1), mRNA   |
| Up at 24 hrs | A_65_P04195 | 2.80 | 0.002 |             |                     | UNKNOWN                                                           |
| Up at 24 hrs | A_65_P04673 | 2.80 | 0.002 | NM_007704.1 | Cipp                | Mus musculus channel-interacting PDZ domain protein (Cipp), mRNA  |
| Up at 24 hrs | A_65_P04570 | 2.80 | 0.032 | U51002.1    | Dlx2                | Mus musculus Dlx-2 gene, complete cds                             |
| Up at 24 hrs | A_65_P03126 | 2.80 | 0.022 | NM_153412.1 | AF506821            | Mus musculus hypothetical protein AF506821 (AF506821), mRNA       |
| Up at 24 hrs | A_65_P01017 | 2.79 | 0.001 | BC005776.1  |                     | CHROMOSOME 20 OPEN READING FRAME                                  |
| Up at 24 hrs | A_65_P02880 | 2.79 | 0.011 |             |                     | UNKNOWN                                                           |
| Up at 24 hrs | A_65_P01172 | 2.79 | 0.042 |             |                     | Intronic in U016208                                               |
| Up at 24 hrs | A_65_P00940 | 2.79 | 0.001 |             | Rarb                | RETINOIC ACID RECEPTOR BETA (RAR-BETA). [Source:SWISSPROT;Acc:P22 |
| Up at 24 hrs | A_65_P01148 | 2.78 | 0.042 |             | Cd28                | Mus musculus CD28 antigen (Cd28), mRNA                            |
| Up at 24 hrs | A_65_P04483 | 2.78 | 0.049 | NM_020271.1 | AB041662            | Mus musculus hypothetical protein, MNCb-4193 (AB041662), mRNA     |
| Up at 24 hrs | A_65_P06572 | 2.77 | 0.001 | NM_008541.1 | Madh5               | Mus musculus MAD homolog 5 (Drosophila) (Madh5), mRNA             |
| Up at 24 hrs | A_65_P02098 | 2.77 | 0.005 | NM_021605.1 | Nek7                | Mus musculus NIMA (never in mitosis gene a)-related expressed kin |
| Up at 24 hrs | A_65_P03015 | 2.77 | 0.030 |             |                     | UNKNOWN                                                           |
| Up at 24 hrs | A_65_P06232 | 2.76 | 0.017 | AK020064.1  | 6030443O07Rik       | BA108L7.8 (NOVEL PROTEIN (TRANSLATION OF CDNA FLJ10512 (EM:AK0013 |
| Up at 24 hrs | A_65_P02495 | 2.76 | 0.002 | XM_131401.2 | 1700065B19Rik       | RING FINGER PROTEIN                                               |
| Up at 24 hrs | A_65_P05738 | 2.76 | 0.049 |             |                     | UNKNOWN                                                           |
| Up at 24 hrs | A_65_P00628 | 2.76 | 0.019 |             |                     | Intronic in U006654                                               |
| Up at 24 hrs | A_65_P03630 | 2.75 | 0.013 | NM_144928.1 | BC013672            | Mus musculus cDNA sequence BC013672 (BC013672), mRNA              |
| Up at 24 hrs | A_65_P07829 | 2.75 | 0.039 |             |                     | Intronic in U018731                                               |
| Up at 24 hrs | A_65_P09475 | 2.74 | 0.047 | NM_013688.1 | Tcte1               | Mus musculus t-complex-associated testis expressed 1 (Tcte1), mRN |
| Up at 24 hrs | A_65_P01805 | 2.74 | 0.002 |             |                     | Intronic in U005667                                               |
| Up at 24 hrs | A_65_P08119 | 2.74 | 0.023 |             |                     | Intronic in U029237                                               |
| Up at 24 hrs | A_65_P02742 | 2.73 | 0.046 |             | AU022194            | UNKNOWN                                                           |
| Up at 24 hrs | A_65_P01297 | 2.73 | 0.004 | NM_172422.1 | 2810421I24Rik       | SIMILAR TO KIAA0971 PROTEIN (FRAGMENT). [Source:SPTREMBL;Acc:Q922 |
| Up at 24 hrs | A_65_P01842 | 2.72 | 0.020 | AP000446.5  | Dlgh2               | Mus musculus discs, large homolog 2 (Drosophila) (Dlgh2), mRNA    |
| Up at 24 hrs | A_65_P01154 | 2.72 | 0.017 | NM_010497.1 | ldh1                | Mus musculus isocitrate dehydrogenase 1 (NADP+), soluble (ldh1),  |
| Up at 24 hrs | A_65_P02820 | 2.72 | 0.049 |             |                     | Intronic in U020241                                               |
| Up at 24 hrs | A_65_P05530 | 2.71 | 0.008 |             |                     | UNKNOWN                                                           |
| Up at 24 hrs | A_65_P04178 | 2.70 | 0.008 |             | D2Erd210e           | Intronic in U042349                                               |
| Up at 24 hrs | A_65_P01895 | 2.68 | 0.004 |             |                     | UNKNOWN                                                           |
| Up at 24 hrs | A_65_P01587 | 2.68 | 0.045 |             |                     | REPEAT-SEQUENCE                                                   |
| Up at 24 hrs | A_65_P04564 | 2.68 | 0.008 |             |                     | Intronic in U031275                                               |
| Up at 24 hrs | A_65_P06888 | 2.68 | 0.032 |             |                     | Intronic in U032546                                               |
| Up at 24 hrs | A_65_P08887 | 2.68 | 0.017 |             |                     | UNKNOWN                                                           |
| Up at 24 hrs | A_65_P07291 | 2.68 | 0.045 | NM_016691.1 | Clcn5               | Mus musculus chloride channel 5 (Clcn5), mRNA                     |
| Up at 24 hrs | A_65_P00581 | 2.68 | 0.020 |             |                     | Intronic in U016900                                               |
| Up at 24 hrs | A_65_P01295 | 2.68 | 0.030 |             |                     | UNKNOWN                                                           |
| Up at 24 hrs | A_65_P04326 | 2.68 | 0.024 |             |                     | hypothetical P-loop containing nucleotide triphosphate hydrolases |
| Up at 24 hrs | A_65_P03358 | 2.67 | 0.000 | BC033410.1  | Eif4enif1           | Mus musculus eukaryotic translation initiation factor 4E nuclear  |
| Up at 24 hrs | A_65_P04761 | 2.67 | 0.040 | XM_149611.2 | A1836376            | hypothetical {Homo sapiens}                                       |
| Up at 24 hrs | A_65_P01891 | 2.67 | 0.013 |             |                     | UNKNOWN                                                           |
| Up at 24 hrs | A_65_P04373 | 2.67 | 0.027 | NM_010820.1 | Mpdz                | Mus musculus multiple PDZ domain protein (Mpdz), mRNA             |

|              |             |      |                   |               |                                                                     |
|--------------|-------------|------|-------------------|---------------|---------------------------------------------------------------------|
| Up at 24 hrs | A_65_P01113 | 2.66 | 0.006 XM_146248.1 | 1500036M03    | MONOCYTIC LEUKEMIA ZINC FINGER PROTEIN ZINC FINGER PROTEIN          |
| Up at 24 hrs | A_65_P03030 | 2.66 | 0.030             |               | Intronic in U043185                                                 |
| Up at 24 hrs | A_65_P00809 | 2.66 | 0.013 NM_007870.1 | Dnase1l3      | Mus musculus deoxyribonuclease 1-like 3 (Dnase1l3), mRNA            |
| Up at 24 hrs | A_65_P01521 | 2.66 | 0.016             |               | UNKNOWN                                                             |
| Up at 24 hrs | A_65_P06911 | 2.66 | 0.039             |               | Intronic in U026159                                                 |
| Up at 24 hrs | A_65_P03650 | 2.65 | 0.023 XM_132234.1 | Ggtb3         | hypothetical ARM repeat structure containing protein                |
| Up at 24 hrs | A_65_P04786 | 2.65 | 0.014             |               | UNKNOWN                                                             |
| Up at 24 hrs | A_65_P03220 | 2.65 | 0.022 NM_007394.1 | Acvr1         | Mus musculus activin A receptor, type 1 (Acvr1), mRNA               |
| Up at 24 hrs | A_65_P04292 | 2.64 | 0.027 NM_009199.1 | Slc1a1        | Mus musculus solute carrier family 1, member 1 (Slc1a1), mRNA       |
| Up at 24 hrs | A_65_P05584 | 2.64 | 0.006             |               | Intronic in U031277                                                 |
| Up at 24 hrs | A_65_P03421 | 2.64 | 0.005             |               | Intronic in U019494                                                 |
| Up at 24 hrs | A_65_P02387 | 2.64 | 0.004 XM_138795.1 | AI788777      | RAS GTPASE ACTIVATING LIKE PROTEIN                                  |
| Up at 24 hrs | A_65_P01920 | 2.63 | 0.016             |               | UNKNOWN                                                             |
| Up at 24 hrs | A_65_P01513 | 2.63 | 0.019             | C78297        | Intronic in U019882                                                 |
| Up at 24 hrs | A_65_P03709 | 2.63 | 0.002             |               | Intronic in U022268                                                 |
| Up at 24 hrs | A_65_P04488 | 2.62 | 0.010 NM_145624.1 | BC021921      | ZINC FINGER PROTEIN                                                 |
| Up at 24 hrs | A_65_P10018 | 2.62 | 0.030 NM_010088.1 | Dtprp         | Mus musculus decidual/trophoblast prolactin-related protein (Dtprp) |
| Up at 24 hrs | A_65_P09247 | 2.62 | 0.005             |               | Intronic in U019591                                                 |
| Up at 24 hrs | A_65_P07565 | 2.62 | 0.014             | Plod1         | Mus musculus procollagen-lysine, 2-oxoglutarate 5-dioxygenase 1 (   |
| Up at 24 hrs | A_65_P02855 | 2.61 | 0.002 XM_179690.1 | LOC265868     | weakly similar to DJ846F13.1 (PHOSPHATIDIC ACID PHOSPHATASE TYPE    |
| Up at 24 hrs | A_65_P01340 | 2.61 | 0.036             |               | UNKNOWN                                                             |
| Up at 24 hrs | A_65_P02933 | 2.61 | 0.009 NM_029083.1 | 5830413E08Rik | Mus musculus RIKEN cDNA 5830413E08 gene (5830413E08Rik), mRNA       |
| Up at 24 hrs | A_65_P04013 | 2.60 | 0.045             |               | UNKNOWN                                                             |
| Up at 24 hrs | A_65_P05374 | 2.60 | 0.032             | C030046E11Rik | similar to BA207C16.2 (NOVEL PROTEIN SIMILAR TO C. ELEGANS R06F6.   |
| Up at 24 hrs | A_65_P04095 | 2.60 | 0.002 AK005061.1  | 1300019H17Rik | Intronic in U026307                                                 |
| Up at 24 hrs | A_65_P03911 | 2.60 | 0.030             | C87114        | UNKNOWN                                                             |
| Up at 24 hrs | A_65_P10120 | 2.60 | 0.031             |               | Intronic in U033210                                                 |
| Up at 24 hrs | A_65_P01114 | 2.60 | 0.002             |               | UNKNOWN                                                             |
| Up at 24 hrs | A_65_P05084 | 2.60 | 0.014             |               | similar to CDNA FLJ11301 FIS, CLONE PLACE1009908, WEAKLY SIMILAR    |
| Up at 24 hrs | A_65_P00825 | 2.59 | 0.003             |               | UNKNOWN                                                             |
| Up at 24 hrs | A_65_P05329 | 2.59 | 0.020 XM_126678.1 | 3000004C01Rik | UNKNOWN                                                             |
| Up at 24 hrs | A_65_P06296 | 2.58 | 0.036 NM_029813.1 | 2210418O10Rik | UNKNOWN                                                             |
| Up at 24 hrs | A_65_P02096 | 2.58 | 0.012 NM_172610.1 | 6230403M19    | BM150J22.1 (NOVEL PROTEIN (ORTHOLOG OF HUMAN C22ORF1)). [Source:S   |
| Up at 24 hrs | A_65_P01854 | 2.58 | 0.043             | Plxnc1        | Mus musculus RIKEN cDNA 4921537D05 gene (4921537D05Rik), mRNA       |
| Up at 24 hrs | A_65_P03798 | 2.58 | 0.030             | 2610301D06Rik | Intronic in U019138                                                 |
| Up at 24 hrs | A_65_P05219 | 2.58 | 0.030             |               | UNKNOWN                                                             |
| Up at 24 hrs | A_65_P07273 | 2.58 | 0.012             |               | UNKNOWN                                                             |
| Up at 24 hrs | A_65_P06693 | 2.57 | 0.010 NM_011217.1 | Ptpr          | Mus musculus protein tyrosine phosphatase, receptor type, R (Ptpr   |
| Up at 24 hrs | A_65_P03646 | 2.57 | 0.013             |               | UNKNOWN                                                             |
| Up at 24 hrs | A_65_P06813 | 2.57 | 0.029             |               | UNKNOWN                                                             |
| Up at 24 hrs | A_65_P01030 | 2.57 | 0.020 XM_132065.1 |               | similar to CDNA FLJ10680 FIS, CLONE NT2RP2006573, WEAKLY SIMILAR    |
| Up at 24 hrs | A_65_P05087 | 2.57 | 0.016 XM_123540.1 | Tbx19         | Mus musculus T-box 19 (Tbx19), mRNA                                 |
| Up at 24 hrs | A_65_P06714 | 2.57 | 0.020 NM_026240.1 | 9130427A09Rik | Mus musculus RIKEN cDNA 9130427A09 gene (9130427A09Rik), mRNA       |
| Up at 24 hrs | A_65_P03342 | 2.56 | 0.004             |               | Intronic in U025333                                                 |
| Up at 24 hrs | A_65_P01024 | 2.56 | 0.026 NM_133215.1 | Mtnr4         | Mus musculus myotubularin related protein 4 (Mtnr4), mRNA           |
| Up at 24 hrs | A_65_P04262 | 2.55 | 0.032             |               | Intronic in U002315                                                 |
| Up at 24 hrs | A_65_P08512 | 2.54 | 0.044             |               | Intronic in U037495                                                 |
| Up at 24 hrs | A_65_P00952 | 2.54 | 0.026             |               | Intronic in U021893                                                 |
| Up at 24 hrs | A_65_P05652 | 2.54 | 0.007             |               | UNKNOWN                                                             |
| Up at 24 hrs | A_65_P03356 | 2.53 | 0.024             |               | Intronic in U036267                                                 |
| Up at 24 hrs | A_65_P05843 | 2.53 | 0.048             |               | UNKNOWN                                                             |
| Up at 24 hrs | A_65_P02362 | 2.53 | 0.031             | Zfp198        | ZINC FINGER PROTEIN 198                                             |
| Up at 24 hrs | A_65_P01499 | 2.53 | 0.029 BC033592.1  | 2210408F11Rik | UNKNOWN                                                             |
| Up at 24 hrs | A_65_P03072 | 2.53 | 0.040             |               | UNKNOWN                                                             |
| Up at 24 hrs | A_65_P09640 | 2.52 | 0.017 AL831819.1  | Xpo4-pending  | Mus musculus exportin 4 (Xpo4-pending), mRNA                        |
| Up at 24 hrs | A_65_P02300 | 2.52 | 0.003             |               | Mus musculus hypothetical protein LOC212514 (LOC212514), mRNA       |
| Up at 24 hrs | A_65_P06514 | 2.52 | 0.023 XM_132292.2 | Usmg3         | Similar to: Mus musculus RIKEN cDNA 4833416I09 gene (4833416I09Ri   |
| Up at 24 hrs | A_65_P09940 | 2.52 | 0.043 XM_131908.2 | Hgf           | HEPATOCTE GROWTH FACTOR PRECURSOR (SCATTER FACTOR) (SF) (HEPATOP    |

|              |             |      |       |               |                                                                   |
|--------------|-------------|------|-------|---------------|-------------------------------------------------------------------|
| Up at 24 hrs | A_65_P05874 | 2.51 | 0.013 |               | Intronic in U043834                                               |
| Up at 24 hrs | A_65_P05485 | 2.50 | 0.046 |               | Intronic in U043101                                               |
| Up at 24 hrs | A_65_P03180 | 2.50 | 0.024 | AW558298      | UNKNOWN                                                           |
| Up at 24 hrs | A_65_P01151 | 2.49 | 0.040 |               | Intronic in U034932                                               |
| Up at 24 hrs | A_65_P04417 | 2.49 | 0.034 |               | UNKNOWN                                                           |
| Up at 24 hrs | A_65_P01924 | 2.49 | 0.025 | D8Erd514e     | UNKNOWN                                                           |
| Up at 24 hrs | A_65_P00999 | 2.49 | 0.022 |               | Intronic in U019292                                               |
| Up at 24 hrs | A_65_P07738 | 2.48 | 0.034 | NM_025350.1   | Cpa1                                                              |
| Up at 24 hrs | A_65_P02359 | 2.48 | 0.020 |               | Mus musculus RIKEN cDNA 0910001L12 gene (0910001L12Rik), mRNA     |
| Up at 24 hrs | A_65_P02384 | 2.47 | 0.010 | 1600014N05Rik | Intronic in U016038                                               |
| Up at 24 hrs | A_65_P02793 | 2.46 | 0.028 |               | hypothetical RabGAP/TBC domain containing protein                 |
| Up at 24 hrs | A_65_P07607 | 2.45 | 0.046 | AI746539      | Intronic in U015989                                               |
| Up at 24 hrs | A_65_P03424 | 2.45 | 0.006 |               | Intronic in U016880                                               |
| Up at 24 hrs | A_65_P07073 | 2.45 | 0.045 |               | UNKNOWN                                                           |
| Up at 24 hrs | A_65_P08099 | 2.45 | 0.008 |               | UNKNOWN                                                           |
| Up at 24 hrs | A_65_P03068 | 2.45 | 0.006 | NM_007755.1   | Cpeb                                                              |
| Up at 24 hrs | A_65_P06038 | 2.44 | 0.046 | XM_149542.1   | D4Erd432e                                                         |
| Up at 24 hrs | A_65_P10231 | 2.43 | 0.011 |               | Mus musculus LOC230912 (LOC230912), mRNA                          |
| Up at 24 hrs | A_65_P02052 | 2.43 | 0.044 |               | Intronic in U040992                                               |
| Up at 24 hrs | A_65_P11625 | 2.42 | 0.007 |               | Intronic in U008646                                               |
| Up at 24 hrs | A_65_P08702 | 2.42 | 0.018 | XM_132454.1   | 1110018O08Rik                                                     |
| Up at 24 hrs | A_65_P01809 | 2.42 | 0.019 |               | hypothetical Trp-Asp repeat (WD-repeat) structure containing prot |
| Up at 24 hrs | A_65_P04287 | 2.41 | 0.003 |               | UNKNOWN                                                           |
| Up at 24 hrs | A_65_P07268 | 2.41 | 0.019 | XM_132372.1   | 2210403N09Rik                                                     |
| Up at 24 hrs | A_65_P02957 | 2.41 | 0.002 |               | GAMMA TUBULIN COMPLEX COMPONENT 6 GCP                             |
| Up at 24 hrs | A_65_P06382 | 2.40 | 0.002 |               | Mus musculus RIKEN cDNA 2210403N09 gene (2210403N09Rik), mRNA     |
| Up at 24 hrs | A_65_P01333 | 2.40 | 0.036 |               | UNKNOWN                                                           |
| Up at 24 hrs | A_65_P03157 | 2.40 | 0.022 | XM_132069.2   | 4631409J12                                                        |
| Up at 24 hrs | A_65_P07165 | 2.39 | 0.014 |               | Intronic in U001900                                               |
| Up at 24 hrs | A_65_P07981 | 2.39 | 0.011 | AK018418.1    | 8430415N23Rik                                                     |
| Up at 24 hrs | A_65_P02193 | 2.39 | 0.032 |               | Intronic in U042927                                               |
| Up at 24 hrs | A_65_P07923 | 2.39 | 0.006 | NM_009971.1   | Csf3                                                              |
| Up at 24 hrs | A_65_P17209 | 2.39 | 0.005 |               | UNCHARACTERIZED GASTRIC PROTEIN YA42P                             |
| Up at 24 hrs | A_65_P04022 | 2.39 | 0.008 | 4633401M22Rik | UNKNOWN                                                           |
| Up at 24 hrs | A_65_P08909 | 2.38 | 0.039 |               | UNKNOWN                                                           |
| Up at 24 hrs | A_65_P02304 | 2.38 | 0.022 | NM_011927.1   | Ceacam9                                                           |
| Up at 24 hrs | A_65_P07146 | 2.38 | 0.035 |               | Mus musculus CEA-related cell adhesion molecule 9 (Ceacam9), mRNA |
| Up at 24 hrs | A_65_P01201 | 2.38 | 0.008 |               | Intronic in U006624                                               |
| Up at 24 hrs | A_65_P02061 | 2.37 | 0.029 | D1Erd705e     |                                                                   |
| Up at 24 hrs | A_65_P02178 | 2.37 | 0.000 |               | Intronic in U036825                                               |
| Up at 24 hrs | A_65_P04508 | 2.37 | 0.010 | NM_008397.1   | Itga6                                                             |
| Up at 24 hrs | A_65_P05860 | 2.37 | 0.024 |               | Mus musculus integrin alpha 6 (Itga6), mRNA                       |
| Up at 24 hrs | A_65_P01526 | 2.37 | 0.040 | Abca5         | UNKNOWN                                                           |
| Up at 24 hrs | A_65_P09043 | 2.37 | 0.043 |               | UNKNOWN                                                           |
| Up at 24 hrs | A_65_P02192 | 2.36 | 0.005 | X93208.1      |                                                                   |
| Up at 24 hrs | A_65_P06251 | 2.36 | 0.016 |               | Intronic in U004633                                               |
| Up at 24 hrs | A_65_P01459 | 2.36 | 0.044 |               | UNKNOWN                                                           |
| Up at 24 hrs | A_65_P06601 | 2.36 | 0.027 | BC011278.1    | Entpd1                                                            |
| Up at 24 hrs | A_65_P01261 | 2.35 | 0.047 | 2310022L06Rik |                                                                   |
| Up at 24 hrs | A_65_P06410 | 2.35 | 0.045 | LOC217026     |                                                                   |
| Up at 24 hrs | A_65_P01316 | 2.35 | 0.028 | NM_053178.1   | Lpd                                                               |
| Up at 24 hrs | A_65_P09847 | 2.35 | 0.041 | XM_139307.1   | AU040377                                                          |
| Up at 24 hrs | A_65_P01060 | 2.35 | 0.018 |               | Mus musculus similar to hypothetical protein FLJ22087 (LOC217026) |
| Up at 24 hrs | A_65_P04267 | 2.34 | 0.018 |               | Mus musculus lipidosin (Lpd), mRNA                                |
| Up at 24 hrs | A_65_P07548 | 2.34 | 0.014 | NM_172795.1   | A830091115                                                        |
| Up at 24 hrs | A_65_P01417 | 2.34 | 0.014 |               | hypothetical Laminin-G domain/Fibronectin type III domain/EGF-lik |
| Up at 24 hrs | A_65_P02345 | 2.34 | 0.044 | NM_153518.1   | AI428139                                                          |
| Up at 24 hrs | A_65_P02320 | 2.34 | 0.022 | NM_009730.1   | Atrn                                                              |
|              |             |      |       |               | REPEAT-SEQUENCE                                                   |
|              |             |      |       |               | Intronic in U035169                                               |
|              |             |      |       |               | SARM                                                              |
|              |             |      |       |               | UNKNOWN                                                           |
|              |             |      |       |               | Mus musculus expressed sequence AI428139 (AI428139), mRNA         |
|              |             |      |       |               | Mus musculus attractin (Atrn), mRNA                               |

|              |             |      |                   |               |                                                                   |
|--------------|-------------|------|-------------------|---------------|-------------------------------------------------------------------|
| Up at 24 hrs | A_65_P01319 | 2.33 | 0.005 L12686.1    | Pde4b         | UNKNOWN                                                           |
| Up at 24 hrs | A_65_P03040 | 2.33 | 0.023             |               | UNKNOWN                                                           |
| Up at 24 hrs | A_65_P09667 | 2.33 | 0.034 NM_011934.1 | Esrrb         | Mus musculus estrogen related receptor, beta (Esrrb), mRNA        |
| Up at 24 hrs | A_65_P02229 | 2.33 | 0.012             | Rpo1-4        | Mus musculus RNA polymerase 1-4 (194 kDa subunit) (Rpo1-4), mRNA  |
| Up at 24 hrs | A_65_P02507 | 2.33 | 0.047             | AW047562      | UDP GLUCOSE                                                       |
| Up at 24 hrs | A_65_P04224 | 2.32 | 0.034             |               | Possibly wrong strand                                             |
| Up at 24 hrs | A_65_P04701 | 2.32 | 0.001 AK001666.1  | Tex20         | Mus musculus testis expressed gene 20 (Tex20), mRNA               |
| Up at 24 hrs | A_65_P02086 | 2.32 | 0.013             |               | Intronic in U018228                                               |
| Up at 24 hrs | A_65_P03146 | 2.32 | 0.009 NM_172550.1 | A130042E20    | weakly similar to PROTEIN C21ORF58 [Homo sapiens]                 |
| Up at 24 hrs | A_65_P02216 | 2.32 | 0.024             |               | Intronic in U018906                                               |
| Up at 24 hrs | A_65_P13046 | 2.32 | 0.034             |               | Intronic in U025019                                               |
| Up at 24 hrs | A_65_P08864 | 2.31 | 0.010             | 2410012M04Rik | weakly similar to PUTATIVE DIPHTHINE SYNTHASE [Schizosaccharomyce |
| Up at 24 hrs | A_65_P02721 | 2.31 | 0.047 BC013769.1  |               | UNKNOWN                                                           |
| Up at 24 hrs | A_65_P06547 | 2.31 | 0.009             | D3ErtD229e    | UNKNOWN                                                           |
| Up at 24 hrs | A_65_P07645 | 2.31 | 0.038 BC037113.1  |               | Similar to: Mus musculus, clone IMAGE:4507681, mRNA               |
| Up at 24 hrs | A_65_P05070 | 2.31 | 0.005             | Csnk1a1       | Mus musculus casein kinase 1, alpha 1 (Csnk1a1), mRNA             |
| Up at 24 hrs | A_65_P01457 | 2.31 | 0.031             |               | UNKNOWN                                                           |
| Up at 24 hrs | A_65_P02580 | 2.31 | 0.020 BC024754.1  | G4-1-pending  | Mus musculus phosphatase subunit gene g4-1 (G4-1-pending), mRNA   |
| Up at 24 hrs | A_65_P05245 | 2.31 | 0.040             |               | Intronic in U009800                                               |
| Up at 24 hrs | A_65_P03020 | 2.31 | 0.042             |               | UNKNOWN                                                           |
| Up at 24 hrs | A_65_P04133 | 2.30 | 0.035             |               | UNKNOWN                                                           |
| Up at 24 hrs | A_65_P02131 | 2.30 | 0.014             |               | UNKNOWN                                                           |
| Up at 24 hrs | A_65_P06703 | 2.30 | 0.024 XM_128828.2 | Gata6         | TRANSCRIPTION FACTOR GATA-6 (GATA BINDING FACTOR-6). [Source:SWIS |
| Up at 24 hrs | A_65_P03425 | 2.30 | 0.020 XM_131274.2 | Ttpa          | TOCOPHEROL (ALPHA) TRANSFER PROTEIN (FRAGMENT). [Source:SPTREMBL; |
| Up at 24 hrs | A_65_P06477 | 2.30 | 0.017             | A930012M21Rik | UNKNOWN                                                           |
| Up at 24 hrs | A_65_P05361 | 2.30 | 0.037             |               | UNKNOWN                                                           |
| Up at 24 hrs | A_65_P02961 | 2.29 | 0.002             |               | Intronic in U026260                                               |
| Up at 24 hrs | A_65_P01146 | 2.29 | 0.035             | Dnmt3a        | Mus musculus DNA methyltransferase 3A (Dnmt3a), mRNA              |
| Up at 24 hrs | A_65_P03835 | 2.29 | 0.020 NM_028291.1 | 2700050F09Rik | Mus musculus RIKEN cDNA 2700050F09 gene (2700050F09Rik), mRNA     |
| Up at 24 hrs | A_65_P07595 | 2.29 | 0.044             |               | UNKNOWN                                                           |
| Up at 24 hrs | A_65_P07346 | 2.29 | 0.006             |               | UNKNOWN                                                           |
| Up at 24 hrs | A_65_P00710 | 2.28 | 0.029             |               | UNKNOWN                                                           |
| Up at 24 hrs | A_65_P08682 | 2.28 | 0.046             |               | UNKNOWN                                                           |
| Up at 24 hrs | A_65_P02081 | 2.28 | 0.009             |               | Intronic in U042914                                               |
| Up at 24 hrs | A_65_P10223 | 2.28 | 0.021             | AU043415      | UNKNOWN                                                           |
| Up at 24 hrs | A_65_P00687 | 2.27 | 0.009             |               | Intronic in U032578                                               |
| Up at 24 hrs | A_65_P02553 | 2.27 | 0.005 NM_021606.1 | Nek6          | Mus musculus NIMA (never in mitosis gene a)-related expressed kin |
| Up at 24 hrs | A_65_P07817 | 2.27 | 0.011             |               | UNKNOWN                                                           |
| Up at 24 hrs | A_65_P11541 | 2.27 | 0.047             |               | UNKNOWN                                                           |
| Up at 24 hrs | A_65_P02213 | 2.27 | 0.019 XM_158009.1 |               | UNKNOWN                                                           |
| Up at 24 hrs | A_65_P04080 | 2.27 | 0.032             |               | UNKNOWN                                                           |
| Up at 24 hrs | A_65_P07182 | 2.26 | 0.043 XM_130138.1 | 4921517N04Rik | SPECKLE TYPE POZ                                                  |
| Up at 24 hrs | A_65_P01823 | 2.26 | 0.039             | AU014678      | UNKNOWN                                                           |
| Up at 24 hrs | A_65_P02327 | 2.26 | 0.014             |               | UNKNOWN                                                           |
| Up at 24 hrs | A_65_P07908 | 2.26 | 0.012             | C80279        | UNKNOWN                                                           |
| Up at 24 hrs | A_65_P05531 | 2.26 | 0.014 NM_007868.1 | Dmd           | Mus musculus dystrophin, muscular dystrophy (Dmd), mRNA           |
| Up at 24 hrs | A_65_P01852 | 2.25 | 0.047             |               | Similar to: Mus musculus 10 days neonate skin cDNA, RIKEN full-le |
| Up at 24 hrs | A_65_P06138 | 2.25 | 0.002             | C78888        | UNKNOWN                                                           |
| Up at 24 hrs | A_65_P02876 | 2.25 | 0.002             |               | Intronic in U041010                                               |
| Up at 24 hrs | A_65_P02018 | 2.25 | 0.035 XM_122259.1 | Gria1         | Mus musculus glutamate receptor, ionotropic, AMPA1 (alpha 1) (Gri |
| Up at 24 hrs | A_65_P00668 | 2.24 | 0.016 AF263285.1  |               | septin 7                                                          |
| Up at 24 hrs | A_65_P02088 | 2.24 | 0.000             |               | Intronic in U024781                                               |
| Up at 24 hrs | A_65_P01710 | 2.24 | 0.017             |               | UNKNOWN                                                           |
| Up at 24 hrs | A_65_P00721 | 2.23 | 0.009             | Rpl31;Skd3    | Mus musculus suppressor of K+ transport defect 3 (Skd3), mRNA     |
| Up at 24 hrs | A_65_P02835 | 2.23 | 0.045             |               | Intronic in U003303                                               |
| Up at 24 hrs | A_65_P04787 | 2.23 | 0.039             |               | Intronic in U016148                                               |
| Up at 24 hrs | A_65_P06756 | 2.23 | 0.027 NM_025940.1 | 2610042L04Rik | Similar to: Mus musculus RIKEN cDNA 2610042L04 gene (2610042L04Ri |
| Up at 24 hrs | A_65_P08706 | 2.23 | 0.028             | D15ErtD529e   | Intronic in U016109                                               |

|              |             |      |       |               |                                                                     |
|--------------|-------------|------|-------|---------------|---------------------------------------------------------------------|
| Up at 24 hrs | A_65_P02944 | 2.23 | 0.030 | C86273        | UNKNOWN                                                             |
| Up at 24 hrs | A_65_P02976 | 2.22 | 0.007 | Kcnk5         | Mus musculus potassium channel, subfamily K, member 5 (Kcnk5), mRNA |
| Up at 24 hrs | A_65_P05819 | 2.22 | 0.029 | NM_026062.1   | Mus musculus RIKEN cDNA 2900024C23 gene (2900024C23Rik), mRNA       |
| Up at 24 hrs | A_65_P08709 | 2.22 | 0.031 |               | UNKNOWN                                                             |
| Up at 24 hrs | A_65_P08265 | 2.21 | 0.011 |               | Intronic in U014751                                                 |
| Up at 24 hrs | A_65_P01435 | 2.21 | 0.024 |               | UNKNOWN                                                             |
| Up at 24 hrs | A_65_P05148 | 2.21 | 0.010 |               | UNKNOWN                                                             |
| Up at 24 hrs | A_65_P12963 | 2.21 | 0.025 | 4921537D05Rik | Mus musculus RIKEN cDNA 4921537D05 gene (4921537D05Rik), mRNA       |
| Up at 24 hrs | A_65_P06398 | 2.20 | 0.018 |               | UNKNOWN                                                             |
| Up at 24 hrs | A_65_P08615 | 2.20 | 0.039 | XM_142881.1   | UNKNOWN                                                             |
| Up at 24 hrs | A_65_P06283 | 2.20 | 0.007 | NM_172680.1   | LOC229227                                                           |
| Up at 24 hrs | A_65_P02687 | 2.20 | 0.012 |               | Mus musculus hypothetical protein LOC229227 (LOC229227), mRNA       |
| Up at 24 hrs | A_65_P04105 | 2.20 | 0.030 |               | Intronic in U039532                                                 |
| Up at 24 hrs | A_65_P02872 | 2.19 | 0.021 | XM_147426.2   | LOC216345                                                           |
| Up at 24 hrs | A_65_P03073 | 2.19 | 0.001 | NM_021454.1   | LOC216345                                                           |
| Up at 24 hrs | A_65_P03427 | 2.19 | 0.001 |               | Mus musculus LOC216345 (LOC216345), mRNA                            |
| Up at 24 hrs | A_65_P03455 | 2.19 | 0.008 |               | UNKNOWN                                                             |
| Up at 24 hrs | A_65_P02871 | 2.19 | 0.004 |               | UNKNOWN                                                             |
| Up at 24 hrs | A_65_P01321 | 2.19 | 0.038 | BC017136.1    | 1810059J10Rik                                                       |
| Up at 24 hrs | A_65_P01898 | 2.18 | 0.007 |               | Mus musculus RIKEN cDNA 1810059J10 gene (1810059J10Rik), mRNA       |
| Up at 24 hrs | A_65_P06420 | 2.18 | 0.027 | NM_027527.1   | REPEAT-SEQUENCE                                                     |
| Up at 24 hrs | A_65_P09948 | 2.18 | 0.041 | NM_008091.1   | Miz1                                                                |
| Up at 24 hrs | A_65_P00996 | 2.17 | 0.028 | NM_008748.1   | Gata3                                                               |
| Up at 24 hrs | A_65_P06525 | 2.17 | 0.007 |               | Mus musculus GATA binding protein 3 (Gata3), mRNA                   |
| Up at 24 hrs | A_65_P08172 | 2.17 | 0.027 |               | Mus musculus dual specificity phosphatase 8 (Dusp8), mRNA           |
| Up at 24 hrs | A_65_P02453 | 2.17 | 0.020 |               | UNKNOWN                                                             |
| Up at 24 hrs | A_65_P02809 | 2.17 | 0.033 |               | Intronic in U010915                                                 |
| Up at 24 hrs | A_65_P04682 | 2.17 | 0.008 | D6Ert588e     | UNKNOWN                                                             |
| Up at 24 hrs | A_65_P01477 | 2.16 | 0.031 |               | Srpk2                                                               |
| Up at 24 hrs | A_65_P02427 | 2.16 | 0.041 | XM_127755.1   | LOC207165                                                           |
| Up at 24 hrs | A_65_P06763 | 2.15 | 0.006 | AE014180.1    | Zfp198                                                              |
| Up at 24 hrs | A_65_P03311 | 2.15 | 0.039 |               | FETAL ALZHEIMER ANTIGEN FETAL ALZ 50 REACTIVE CLONE                 |
| Up at 24 hrs | A_65_P01230 | 2.15 | 0.006 | XM_125741.1   | 1200008N06Rik                                                       |
| Up at 24 hrs | A_65_P03273 | 2.15 | 0.003 | L31532.1      | Zfp198                                                              |
| Up at 24 hrs | A_65_P02077 | 2.15 | 0.007 |               | ZINC FINGER PROTEIN 198                                             |
| Up at 24 hrs | A_65_P13427 | 2.15 | 0.044 |               | Intronic in U042731                                                 |
| Up at 24 hrs | A_65_P03127 | 2.15 | 0.003 |               | Intronic in U024460                                                 |
| Up at 24 hrs | A_65_P01448 | 2.15 | 0.027 | 5830472F04Rik | hypothetical RhoGAP domain containing protein                       |
| Up at 24 hrs | A_65_P01262 | 2.15 | 0.033 | NM_172257.1   | 1200008N06Rik                                                       |
| Up at 24 hrs | A_65_P01611 | 2.14 | 0.040 | NM_172728.1   | Bcl2                                                                |
| Up at 24 hrs | A_65_P04275 | 2.14 | 0.011 | BC026619.1    | Mus musculus B-cell leukemia/lymphoma 2 (Bcl2), mRNA                |
| Up at 24 hrs | A_65_P07730 | 2.14 | 0.036 | NM_026183.2   | 1700030G05Rik                                                       |
| Up at 24 hrs | A_65_P07808 | 2.14 | 0.002 | XM_149076.2   | 1700030G05Rik                                                       |
| Up at 24 hrs | A_65_P02651 | 2.13 | 0.010 |               | Mus musculus RIKEN cDNA 1700030G05 gene (1700030G05Rik), mRNA       |
| Up at 24 hrs | A_65_P07549 | 2.13 | 0.029 | D30734.1      | UNKNOWN                                                             |
| Up at 24 hrs | A_65_P06275 | 2.13 | 0.018 | XM_058994.4   | 5830472F04Rik                                                       |
| Up at 24 hrs | A_65_P07691 | 2.13 | 0.010 |               | UNKNOWN                                                             |
| Up at 24 hrs | A_65_P11620 | 2.13 | 0.023 |               | UNKNOWN                                                             |
| Up at 24 hrs | A_65_P02868 | 2.13 | 0.015 |               | UNKNOWN                                                             |
| Up at 24 hrs | A_65_P03252 | 2.13 | 0.013 |               | Intronic in U026171                                                 |
| Up at 24 hrs | A_65_P02977 | 2.13 | 0.045 |               | Intronic in U012454                                                 |
| Up at 24 hrs | A_65_P02063 | 2.12 | 0.041 |               | UNKNOWN                                                             |
| Up at 24 hrs | A_65_P04774 | 2.12 | 0.035 | XM_135953.2   | 2410003J06Rik                                                       |
| Up at 24 hrs | A_65_P05475 | 2.12 | 0.050 |               | MELANOMA ASSOCIATED ANTIGEN MAGE                                    |
| Up at 24 hrs | A_65_P09180 | 2.12 | 0.020 |               | REPEAT-SEQUENCE                                                     |
| Up at 24 hrs | A_65_P00527 | 2.12 | 0.003 |               | Intronic in U003222                                                 |
| Up at 24 hrs | A_65_P00627 | 2.11 | 0.020 |               | Intronic in U001880                                                 |
| Up at 24 hrs | A_65_P07243 | 2.11 | 0.027 | Mkrm2         | Mus musculus makorin, ring finger protein, 2 (Mkrm2), mRNA          |
|              |             |      |       |               | Intronic in U007150                                                 |

|              |             |      |       |             |                                                                   |
|--------------|-------------|------|-------|-------------|-------------------------------------------------------------------|
| Up at 24 hrs | A_65_P05972 | 2.11 | 0.043 |             | UNKNOWN                                                           |
| Up at 24 hrs | A_65_P07082 | 2.11 | 0.030 |             | UNKNOWN                                                           |
| Up at 24 hrs | A_65_P07275 | 2.11 | 0.037 | AY064986.1  | UNKNOWN                                                           |
| Up at 24 hrs | A_65_P06898 | 2.11 | 0.025 |             | Intronic in U032285                                               |
| Up at 24 hrs | A_65_P00541 | 2.11 | 0.013 |             | Intronic in U010584                                               |
| Up at 24 hrs | A_65_P06252 | 2.11 | 0.041 | NM_144888.1 | MGC25836                                                          |
| Up at 24 hrs | A_65_P06882 | 2.11 | 0.045 |             | UNKNOWN                                                           |
| Up at 24 hrs | A_65_P02656 | 2.11 | 0.010 | XM_130975.1 | MGC38548                                                          |
| Up at 24 hrs | A_65_P01536 | 2.11 | 0.014 | NM_172581.1 | 9330169D17                                                        |
| Up at 24 hrs | A_65_P01406 | 2.10 | 0.010 |             | UNKNOWN                                                           |
| Up at 24 hrs | A_65_P04272 | 2.10 | 0.047 | AK014201.1  | 5730405I09Rik                                                     |
| Up at 24 hrs | A_65_P06231 | 2.10 | 0.012 |             | 1200008A14Rik                                                     |
| Up at 24 hrs | A_65_P02589 | 2.10 | 0.035 |             | UNKNOWN                                                           |
| Up at 24 hrs | A_65_P13076 | 2.10 | 0.008 |             | Intronic in U038375                                               |
| Up at 24 hrs | A_65_P01794 | 2.10 | 0.035 | XM_129845.2 | Fn1                                                               |
| Up at 24 hrs | A_65_P06858 | 2.10 | 0.009 | NM_008393.1 | Irx3                                                              |
| Up at 24 hrs | A_65_P04738 | 2.09 | 0.047 |             | Snap91                                                            |
| Up at 24 hrs | A_65_P10116 | 2.09 | 0.025 | XM_135209.1 | Eomes                                                             |
| Up at 24 hrs | A_65_P05937 | 2.09 | 0.038 |             | UNKNOWN                                                           |
| Up at 24 hrs | A_65_P06474 | 2.09 | 0.004 |             | Intronic in U001642                                               |
| Up at 24 hrs | A_65_P06673 | 2.08 | 0.024 | NM_009988.1 | Cxadr                                                             |
| Up at 24 hrs | A_65_P04200 | 2.08 | 0.028 | XM_145052.1 | C85549                                                            |
| Up at 24 hrs | A_65_P07791 | 2.08 | 0.008 |             | UNKNOWN                                                           |
| Up at 24 hrs | A_65_P02268 | 2.08 | 0.031 |             | UNKNOWN                                                           |
| Up at 24 hrs | A_65_P03266 | 2.08 | 0.003 | XM_162416.1 | C79529                                                            |
| Up at 24 hrs | A_65_P04896 | 2.08 | 0.009 |             | UNKNOWN                                                           |
| Up at 24 hrs | A_65_P07929 | 2.08 | 0.010 |             | UNKNOWN                                                           |
| Up at 24 hrs | A_65_P03638 | 2.08 | 0.004 |             | UNKNOWN                                                           |
| Up at 24 hrs | A_65_P05726 | 2.08 | 0.010 |             | Tubgcp2                                                           |
| Up at 24 hrs | A_65_P02693 | 2.07 | 0.003 | NM_008372.2 | Il7r                                                              |
| Up at 24 hrs | A_65_P09009 | 2.07 | 0.011 |             | UNKNOWN                                                           |
| Up at 24 hrs | A_65_P01930 | 2.07 | 0.009 |             | UNKNOWN                                                           |
| Up at 24 hrs | A_65_P03758 | 2.06 | 0.050 |             | REPEAT-SEQUENCE                                                   |
| Up at 24 hrs | A_65_P07420 | 2.06 | 0.004 |             | Intronic in U037638                                               |
| Up at 24 hrs | A_65_P03627 | 2.06 | 0.029 |             | CHONDROITIN                                                       |
| Up at 24 hrs | A_65_P01800 | 2.06 | 0.003 |             | UNKNOWN                                                           |
| Up at 24 hrs | A_65_P02102 | 2.06 | 0.007 |             | Ate1                                                              |
| Up at 24 hrs | A_65_P00614 | 2.06 | 0.013 | XM_149708.1 | 4930451F05Rik                                                     |
| Up at 24 hrs | A_65_P07363 | 2.06 | 0.022 |             | UNKNOWN                                                           |
| Up at 24 hrs | A_65_P01317 | 2.06 | 0.020 |             | UNKNOWN                                                           |
| Up at 24 hrs | A_65_P05844 | 2.05 | 0.008 |             | Intronic in U027172                                               |
| Up at 24 hrs | A_65_P04481 | 2.05 | 0.004 |             | Intronic in U028802                                               |
| Up at 24 hrs | A_65_P05444 | 2.05 | 0.006 |             | Similar to: Mus musculus 10 days neonate skin cDNA, RIKEN full-le |
| Up at 24 hrs | A_65_P06524 | 2.05 | 0.006 | NM_025085.2 | Narg1                                                             |
| Up at 24 hrs | A_65_P02779 | 2.05 | 0.021 |             | Mus musculus NMDA receptor-regulated gene 1 (Narg1), mRNA         |
| Up at 24 hrs | A_65_P05689 | 2.05 | 0.020 |             | Intronic in U037371                                               |
| Up at 24 hrs | A_65_P02339 | 2.05 | 0.049 |             | Intronic in U013121                                               |
| Up at 24 hrs | A_65_P05044 | 2.05 | 0.024 |             | UNKNOWN                                                           |
| Up at 24 hrs | A_65_P12151 | 2.05 | 0.033 |             | Intronic in U040948                                               |
| Up at 24 hrs | A_65_P00807 | 2.04 | 0.015 | XM_149499.2 | AU015892                                                          |
| Up at 24 hrs | A_65_P04851 | 2.04 | 0.043 |             | eIF2C1                                                            |
| Up at 24 hrs | A_65_P02788 | 2.04 | 0.039 |             | C87006                                                            |
| Up at 24 hrs | A_65_P05101 | 2.04 | 0.011 |             | UNKNOWN                                                           |
| Up at 24 hrs | A_65_P12735 | 2.04 | 0.012 |             | 2810420M18Rik                                                     |
| Up at 24 hrs | A_65_P00970 | 2.04 | 0.012 | NM_019420.1 | B3galt4                                                           |
| Up at 24 hrs | A_65_P04184 | 2.03 | 0.019 | AF251021.1  | Pfkp                                                              |
| Up at 24 hrs | A_65_P02225 | 2.03 | 0.022 | NM_007693.1 | Chga                                                              |
| Up at 24 hrs | A_65_P01386 | 2.03 | 0.047 | XM_130352.1 | Nckap1                                                            |
|              |             |      |       |             | Intronic in U022797                                               |

|              |             |      |       |               |                                                                   |                                                                   |
|--------------|-------------|------|-------|---------------|-------------------------------------------------------------------|-------------------------------------------------------------------|
| Up at 24 hrs | A_65_P03446 | 2.03 | 0.045 |               | UNKNOWN                                                           |                                                                   |
| Up at 24 hrs | A_65_P04776 | 2.03 | 0.040 | 1110064N10Rik | Mus musculus RIKEN cDNA 1110064N10 gene (1110064N10Rik), mRNA     |                                                                   |
| Up at 24 hrs | A_65_P06001 | 2.03 | 0.034 | 2610200M23Rik | LCK-ASSOCIATED SIGNAL TRANSDUCER LAST. [Source:SPTREMBL;Acc:Q9EQP |                                                                   |
| Up at 24 hrs | A_65_P01070 | 2.02 | 0.025 | NM_028105.1   | 2610005A10Rik                                                     | hypothetical Eukaryotic protein kinase containing protein (ABC1 f |
| Up at 24 hrs | A_65_P08317 | 2.02 | 0.001 |               | hypothetical DIX domain containing protein                        |                                                                   |
| Up at 24 hrs | A_65_P17404 | 2.02 | 0.029 |               | UNKNOWN                                                           |                                                                   |
| Up at 24 hrs | A_65_P04888 | 2.02 | 0.046 |               | UNKNOWN                                                           |                                                                   |
| Up at 24 hrs | A_65_P02022 | 2.01 | 0.031 |               | Intronic in U029722                                               |                                                                   |
| Up at 24 hrs | A_65_P04008 | 2.01 | 0.004 | XM_145140.1   | Zfp-60                                                            | Mus musculus similar to Zinc finger protein 60 (Zfp-60) (Zinc fin |
| Up at 24 hrs | A_65_P03811 | 2.01 | 0.036 |               | UNKNOWN                                                           |                                                                   |
| Up at 24 hrs | A_65_P06533 | 2.01 | 0.020 | NM_010514.1   | Igf2                                                              | Mus musculus insulin-like growth factor 2 (Igf2), mRNA            |
| Up at 24 hrs | A_65_P04831 | 2.00 | 0.034 |               | UNKNOWN                                                           |                                                                   |
| Up at 24 hrs | A_65_P03437 | 2.00 | 0.003 |               | Intronic in U032546                                               |                                                                   |
| Up at 24 hrs | A_65_P01068 | 2.00 | 0.026 |               | Intronic in U035129                                               |                                                                   |
| Up at 24 hrs | A_65_P03145 | 2.00 | 0.037 |               | Intronic in U027680                                               |                                                                   |
| Up at 24 hrs | A_65_P02130 | 2.00 | 0.043 |               | UNKNOWN                                                           |                                                                   |
| Up at 24 hrs | A_65_P02282 | 2.00 | 0.009 | NM_014928.1   | 4930431L18Rik                                                     | Similar to: Mus musculus, Similar to RIKEN cDNA 4930431L18 gene,  |
| Up at 24 hrs | A_65_P12298 | 2.00 | 0.046 |               | Intronic in U032656                                               |                                                                   |
| Up at 24 hrs | A_65_P02782 | 2.00 | 0.016 | XM_143055.1   | Arpc1a                                                            | hypothetical Retroviral matrix proteins structure containing prot |
| Up at 24 hrs | A_65_P06802 | 2.00 | 0.025 |               | Atp6v1b2                                                          | Mus musculus ATPase, H+ transporting, lysosomal 56/58kD, V1 subun |
| Up at 24 hrs | A_65_P08658 | 2.00 | 0.005 | NM_145977.1   | 2210413P12Rik                                                     | Mus musculus hypothetical protein MGC32471 (MGC32471), mRNA       |
| Up at 24 hrs | A_65_P04087 | 1.99 | 0.035 | NM_026187.1   | D1Erd161e                                                         | Intronic in U021495                                               |
| Up at 24 hrs | A_65_P10244 | 1.99 | 0.043 |               | UNKNOWN                                                           |                                                                   |
| Up at 24 hrs | A_65_P03663 | 1.99 | 0.028 |               | Intronic in U021526                                               |                                                                   |
| Up at 24 hrs | A_65_P09380 | 1.99 | 0.024 | NM_029001.1   | 9130013K24Rik                                                     | Mus musculus RIKEN cDNA 9130013K24 gene (9130013K24Rik), mRNA     |
| Up at 24 hrs | A_65_P13552 | 1.99 | 0.005 |               | UNKNOWN                                                           |                                                                   |
| Up at 24 hrs | A_65_P08612 | 1.99 | 0.038 |               | UNKNOWN                                                           |                                                                   |
| Up at 24 hrs | A_65_P04490 | 1.99 | 0.011 | XM_132740.1   |                                                                   | TATA ELEMENT MODULATORY FACTOR                                    |
| Up at 24 hrs | A_65_P07007 | 1.99 | 0.042 |               | Intronic in U003913                                               |                                                                   |
| Up at 24 hrs | A_65_P02357 | 1.98 | 0.010 | XM_136709.1   |                                                                   | UNKNOWN                                                           |
| Up at 24 hrs | A_65_P03528 | 1.98 | 0.014 | NM_145619.2   | Adprt13                                                           | Mus musculus similar to Poly [ADP-ribose] polymerase-3 (PARP-3) ( |
| Up at 24 hrs | A_65_P04383 | 1.98 | 0.022 |               | C76332                                                            | UNKNOWN                                                           |
| Up at 24 hrs | A_65_P07831 | 1.98 | 0.010 | NM_027324.2   | Sfxn1                                                             | Mus musculus sideroflexin 1 (Sfxn1), mRNA                         |
| Up at 24 hrs | A_65_P01859 | 1.98 | 0.033 | NM_133847.1   | AU045326                                                          | TRANSMEMBRANE 9 SUPERFAMILY PROTEIN MEMBER                        |
| Up at 24 hrs | A_65_P02849 | 1.98 | 0.032 |               | UNKNOWN                                                           |                                                                   |
| Up at 24 hrs | A_65_P12815 | 1.98 | 0.031 |               | UNKNOWN                                                           |                                                                   |
| Up at 24 hrs | A_65_P03064 | 1.98 | 0.042 | AB030616.1    | Chk                                                               | Similar to: Mus musculus Chetk-alpha gene for choline/ethanolamin |
| Up at 24 hrs | A_65_P06171 | 1.98 | 0.038 | XM_128929.1   |                                                                   | HEPATOCYTE NUCLEAR FACTOR 6 HNF 6 ONE CUT DOMAIN FAMILY MEMBER    |
| Up at 24 hrs | A_65_P07833 | 1.97 | 0.001 |               | Intronic in U024462                                               |                                                                   |
| Up at 24 hrs | A_65_P03862 | 1.97 | 0.012 | NM_007566.1   | Birc6                                                             | REPEAT-SEQUENCE                                                   |
| Up at 24 hrs | A_65_P02196 | 1.97 | 0.016 |               | UNKNOWN                                                           |                                                                   |
| Up at 24 hrs | A_65_P01907 | 1.97 | 0.014 |               | AI503301                                                          | Mus musculus RIKEN cDNA 3300001P08 gene (3300001P08Rik), mRNA     |
| Up at 24 hrs | A_65_P08303 | 1.97 | 0.043 |               | Intronic in U027299                                               |                                                                   |
| Up at 24 hrs | A_65_P01327 | 1.96 | 0.003 | NM_008698.1   | Nipsnap1                                                          | Mus musculus 4-nitrophenylphosphatase domain and non-neuronal SNA |
| Up at 24 hrs | A_65_P12740 | 1.96 | 0.003 |               | Intronic in U025671                                               |                                                                   |
| Up at 24 hrs | A_65_P09349 | 1.96 | 0.038 |               | Intronic in U036459                                               |                                                                   |
| Up at 24 hrs | A_65_P11346 | 1.96 | 0.033 |               | Intronic in U025960                                               |                                                                   |
| Up at 24 hrs | A_65_P07924 | 1.96 | 0.003 | NM_144920.2   | 2810431N21Rik                                                     | Mus musculus EST AI428202 (AI428202), mRNA                        |
| Up at 24 hrs | A_65_P03580 | 1.96 | 0.033 | NM_013633.1   | Pou5f1                                                            | Mus musculus POU domain, class 5, transcription factor 1 (Pou5f1) |
| Up at 24 hrs | A_65_P04663 | 1.96 | 0.031 |               | UNKNOWN                                                           |                                                                   |
| Up at 24 hrs | A_65_P00625 | 1.96 | 0.010 |               | Mcoln3                                                            | Mus musculus mucolin3 (Mcoln3), mRNA                              |
| Up at 24 hrs | A_65_P04798 | 1.95 | 0.044 | BC021394.1    |                                                                   | Similar to: Mus musculus hypothetical gene supported by AK082906  |
| Up at 24 hrs | A_65_P07832 | 1.95 | 0.036 | AB075549.1    | Gata4                                                             | Mus musculus GATA binding protein 4 (Gata4), mRNA                 |
| Up at 24 hrs | A_65_P13620 | 1.95 | 0.022 |               | NY-REN-36 ANTIGEN (FRAGMENT) homolog [Homo sapiens]               |                                                                   |
| Up at 24 hrs | A_65_P02019 | 1.95 | 0.023 | AB022053.1    | Prep                                                              | Mus musculus prolyl endopeptidase (Prep), mRNA                    |
| Up at 24 hrs | A_65_P07449 | 1.95 | 0.037 |               | 1810042K04Rik                                                     | Mus musculus RIKEN cDNA 1810042K04 gene (1810042K04Rik), mRNA     |
| Up at 24 hrs | A_65_P08221 | 1.95 | 0.040 |               | Intronic in U038091                                               |                                                                   |
| Up at 24 hrs | A_65_P06136 | 1.95 | 0.046 |               | UNKNOWN                                                           |                                                                   |



|              |             |      |                   |               |                                                                   |
|--------------|-------------|------|-------------------|---------------|-------------------------------------------------------------------|
| Up at 24 hrs | A_65_P06485 | 1.95 | 0.035             |               | Intronic in U026522                                               |
| Up at 24 hrs | A_65_P07163 | 1.95 | 0.014             | Ppil2         | UNKNOWN                                                           |
| Up at 24 hrs | A_65_P01293 | 1.94 | 0.043             |               | UNKNOWN                                                           |
| Up at 24 hrs | A_65_P02459 | 1.94 | 0.002 XM_139811.1 |               | ZINC FINGER PROTEIN                                               |
| Up at 24 hrs | A_65_P06992 | 1.94 | 0.049 AL832136.1  | Irs4          | Mus musculus insulin receptor substrate 4 (Irs4), mRNA            |
| Up at 24 hrs | A_65_P03836 | 1.94 | 0.015             |               | Intronic in U032458                                               |
| Up at 24 hrs | A_65_P06132 | 1.94 | 0.006             |               | UNKNOWN                                                           |
| Up at 24 hrs | A_65_P12664 | 1.94 | 0.011             | C79446        | Intronic in U041110                                               |
| Up at 24 hrs | A_65_P00635 | 1.94 | 0.010             |               | UNKNOWN                                                           |
| Up at 24 hrs | A_65_P02756 | 1.94 | 0.039             | Psma7         | Mus musculus proteasome (prosome, macropain) subunit, alpha type  |
| Up at 24 hrs | A_65_P20806 | 1.94 | 0.019             | Plat          | Mus musculus plasminogen activator, tissue (Plat), mRNA           |
| Up at 24 hrs | A_65_P00529 | 1.93 | 0.030 NM_010835.1 | Msx1          | Mus musculus homeo box, msh-like 1 (Msx1), mRNA                   |
| Up at 24 hrs | A_65_P05330 | 1.93 | 0.045 XM_160361.1 | D3ErtD711e    | UNKNOWN                                                           |
| Up at 24 hrs | A_65_P00530 | 1.93 | 0.025 XM_127231.2 | Tbce          | COFACTOR E TUBULIN SPECIFIC CHAPERONE                             |
| Up at 24 hrs | A_65_P02444 | 1.93 | 0.019             |               | UNKNOWN                                                           |
| Up at 24 hrs | A_65_P03817 | 1.93 | 0.016 NM_010234.1 | Fos           | Mus musculus FBJ osteosarcoma oncogene (Fos), mRNA                |
| Up at 24 hrs | A_65_P03622 | 1.93 | 0.004             |               | UNKNOWN                                                           |
| Up at 24 hrs | A_65_P02271 | 1.92 | 0.017 BC010233.1  | Dnm2          | PUTATIVE T1/ST2 RECEPTOR BINDING PROTEIN PRECURSOR (FRAGMENT). [S |
| Up at 24 hrs | A_65_P01511 | 1.92 | 0.016             | AU023617      | UNKNOWN                                                           |
| Up at 24 hrs | A_65_P00801 | 1.92 | 0.010             |               | UNKNOWN                                                           |
| Up at 24 hrs | A_65_P04209 | 1.91 | 0.024 XM_125540.1 |               | UNKNOWN                                                           |
| Up at 24 hrs | A_65_P07746 | 1.91 | 0.039 NM_013682.1 | T2            | Mus musculus brachyury 2 (T2), mRNA                               |
| Up at 24 hrs | A_65_P04982 | 1.91 | 0.010             | Map4k4        | Mus musculus mitogen-activated protein kinase kinase kinase       |
| Up at 24 hrs | A_65_P09678 | 1.91 | 0.043             |               | UNKNOWN                                                           |
| Up at 24 hrs | A_65_P01483 | 1.91 | 0.008             | 1110004B19Rik | Mus musculus RIKEN cDNA 1110004B19 gene (1110004B19Rik), mRNA     |
| Up at 24 hrs | A_65_P01922 | 1.91 | 0.027 XM_126252.1 | D11ErtD172e   | Mus musculus similar to MUM2 protein [Homo sapiens] (LOC276923),  |
| Up at 24 hrs | A_65_P02463 | 1.91 | 0.042             |               | KRUEPPEL LIKE FACTOR 12 TRANSCRIPTIONAL REPRESSOR AP              |
| Up at 24 hrs | A_65_P05457 | 1.91 | 0.047             |               | UNKNOWN                                                           |
| Up at 24 hrs | A_65_P07640 | 1.91 | 0.005             | Rbbp2         | retinoblastoma binding protein 2                                  |
| Up at 24 hrs | A_65_P02206 | 1.91 | 0.015             | Rab5b         | Mus musculus RAB5B, member RAS oncogene family (Rab5b), mRNA      |
| Up at 24 hrs | A_65_P10033 | 1.91 | 0.006             | C77847        | UNKNOWN                                                           |
| Up at 24 hrs | A_65_P02188 | 1.90 | 0.032             |               | Intronic in U002577                                               |
| Up at 24 hrs | A_65_P02964 | 1.90 | 0.016 S69263.1    | Gnao          | Mus musculus guanine nucleotide binding protein, alpha o (Gnao),  |
| Up at 24 hrs | A_65_P09067 | 1.90 | 0.009             |               | UNKNOWN                                                           |
| Up at 24 hrs | A_65_P02670 | 1.90 | 0.030             |               | REPEAT-SEQUENCE                                                   |
| Up at 24 hrs | A_65_P07366 | 1.90 | 0.016             |               | UNKNOWN                                                           |
| Up at 24 hrs | A_65_P09515 | 1.90 | 0.002             |               | UNKNOWN                                                           |
| Up at 24 hrs | A_65_P01987 | 1.90 | 0.034 XM_137558.1 |               | UNKNOWN                                                           |
| Up at 24 hrs | A_65_P01001 | 1.90 | 0.046             |               | Intronic in U030762                                               |
| Up at 24 hrs | A_65_P01848 | 1.90 | 0.003 NM_025888.1 | 2410004N11Rik | Mus musculus RIKEN cDNA 2410004N11 gene (2410004N11Rik), mRNA     |
| Up at 24 hrs | A_65_P05725 | 1.89 | 0.016             |               | Intronic in U034738                                               |
| Up at 24 hrs | A_65_P06179 | 1.89 | 0.032             |               | UNKNOWN                                                           |
| Up at 24 hrs | A_65_P10355 | 1.89 | 0.042             |               | UNKNOWN                                                           |
| Up at 24 hrs | A_65_P04025 | 1.89 | 0.049 BC035209.1  | Ppfbp1        | PTPRF interacting protein, binding protein 1 (liprin beta 1)      |
| Up at 24 hrs | A_65_P05333 | 1.89 | 0.017             | Sema5a        | Mus musculus sema domain, seven thrombospondin repeats (type 1 an |
| Up at 24 hrs | A_65_P10983 | 1.89 | 0.044             |               | Similar to: Mus musculus adult male medulla oblongata cDNA, RIKEN |
| Up at 24 hrs | A_65_P02938 | 1.89 | 0.026             |               | UNKNOWN                                                           |
| Up at 24 hrs | A_65_P03574 | 1.89 | 0.030 XM_133929.2 | LOC213573     | UNKNOWN                                                           |
| Up at 24 hrs | A_65_P02963 | 1.89 | 0.000             |               | UNKNOWN                                                           |
| Up at 24 hrs | A_65_P03075 | 1.89 | 0.033             |               | UNKNOWN                                                           |
| Up at 24 hrs | A_65_P05040 | 1.89 | 0.024             | AW544599      | UNKNOWN                                                           |
| Up at 24 hrs | A_65_P02564 | 1.89 | 0.004             |               | Intronic in U014579                                               |
| Up at 24 hrs | A_65_P02722 | 1.89 | 0.015 NM_133801.1 | C76800        | UNKNOWN                                                           |
| Up at 24 hrs | A_65_P03253 | 1.89 | 0.009             | Cdc42         | Mus musculus cell division cycle 42 homolog (S. cerevisiae) (Cdc4 |
| Up at 24 hrs | A_65_P02023 | 1.88 | 0.027             |               | UNKNOWN                                                           |
| Up at 24 hrs | A_65_P01138 | 1.88 | 0.014             | C78549        | PHOSPHATIDYLINOSITOL 4 KINASE ALPHA EC 2.7.1.67 PI4 KINASE PTDINS |
| Up at 24 hrs | A_65_P04644 | 1.88 | 0.015 XM_129771.2 |               | Mus musculus similar to Hypothetical protein KIAA0173 (LOC227296) |
| Up at 24 hrs | A_65_P00893 | 1.88 | 0.047             | AU022749      | UNKNOWN                                                           |

|              |             |      |                   |               |                                                                   |
|--------------|-------------|------|-------------------|---------------|-------------------------------------------------------------------|
| Up at 24 hrs | A_65_P03922 | 1.88 | 0.034             | Ctps          | Mus musculus cytidine 5-triphosphate synthase (Ctps), mRNA        |
| Up at 24 hrs | A_65_P12682 | 1.88 | 0.005 NM_011775.2 | Zp2           | Mus musculus zona pellucida glycoprotein 2 (Zp2), mRNA            |
| Up at 24 hrs | A_65_P07136 | 1.88 | 0.039 NM_008826.1 | Pfkl          | Mus musculus phosphofructokinase, liver, B-type (Pfkl), mRNA      |
| Up at 24 hrs | A_65_P19078 | 1.88 | 0.019             |               | Intronic in U043529                                               |
| Up at 24 hrs | A_65_P02789 | 1.88 | 0.007 AB067508.1  |               | KELCH LIKE PROTEIN                                                |
| Up at 24 hrs | A_65_P04454 | 1.87 | 0.008             |               | UNKNOWN                                                           |
| Up at 24 hrs | A_65_P03343 | 1.87 | 0.002 XM_134035.1 | A730042J05    | HT004 PROTEIN homolog [Homo sapiens]                              |
| Up at 24 hrs | A_65_P15409 | 1.87 | 0.009             |               | Intronic in U042638                                               |
| Up at 24 hrs | A_65_P03155 | 1.87 | 0.017 NM_009003.1 | Rab4a         | Mus musculus RAB4A, member RAS oncogene family (Rab4a), mRNA      |
| Up at 24 hrs | A_65_P01226 | 1.87 | 0.007             |               | UNKNOWN                                                           |
| Up at 24 hrs | A_65_P01829 | 1.87 | 0.028             |               | UNKNOWN                                                           |
| Up at 24 hrs | A_65_P07537 | 1.87 | 0.042 BC024912.1  |               | Intronic in U028932                                               |
| Up at 24 hrs | A_65_P00609 | 1.87 | 0.002 NM_010110.1 | Efnb1         | Mus musculus ephrin B1 (Efnb1), mRNA                              |
| Up at 24 hrs | A_65_P01551 | 1.87 | 0.033             | LOC170938     | Intronic in U009473                                               |
| Up at 24 hrs | A_65_P06909 | 1.87 | 0.023             |               | UNKNOWN                                                           |
| Up at 24 hrs | A_65_P06689 | 1.86 | 0.027             |               | Intronic in U000688                                               |
| Up at 24 hrs | A_65_P00896 | 1.86 | 0.049 XM_148513.1 | Alcam         | CD166 ANTIGEN PRECURSOR (ACTIVATED LEUKOCYTE-CELL ADHESION MOLECU |
| Up at 24 hrs | A_65_P09626 | 1.86 | 0.029 BC024917.1  | 3110056M06Rik | Mus musculus RIKEN cDNA 3110056M06 gene (3110056M06Rik), mRNA     |
| Up at 24 hrs | A_65_P03632 | 1.86 | 0.035 BC036771.1  |               | Similar to: Rattus norvegicus Kilon (LOC59318), mRNA              |
| Up at 24 hrs | A_65_P04219 | 1.86 | 0.037             | C77905        | UNKNOWN                                                           |
| Up at 24 hrs | A_65_P08235 | 1.86 | 0.009             | D2Abb1e       | Mus musculus nemo like kinase (Nlk), mRNA                         |
| Up at 24 hrs | A_65_P11449 | 1.86 | 0.020             |               | Intronic in U022749                                               |
| Up at 24 hrs | A_65_P05942 | 1.86 | 0.007 NM_025879.1 | 2410002O22Rik | Mus musculus RIKEN cDNA 2410002O22 gene (2410002O22Rik), mRNA     |
| Up at 24 hrs | A_65_P00958 | 1.85 | 0.036             | Al120166      | Intronic in U043095                                               |
| Up at 24 hrs | A_65_P02049 | 1.85 | 0.046 NM_011751.1 | Zfp207        | Mus musculus zinc finger protein 207 (Zfp207), mRNA               |
| Up at 24 hrs | A_65_P02237 | 1.85 | 0.020 NM_018765.1 | Wbp4          | Mus musculus WW domain binding protein 4 (Wbp4), mRNA             |
| Up at 24 hrs | A_65_P07265 | 1.85 | 0.019             | Mta3          | Mus musculus metastasis associated 3 (Mta3), mRNA                 |
| Up at 24 hrs | A_65_P01713 | 1.85 | 0.035 NM_026677.1 | 0610007N03Rik | Mus musculus RIKEN cDNA 0610007N03 gene (0610007N03Rik), mRNA     |
| Up at 24 hrs | A_65_P10797 | 1.85 | 0.043             | Dlg;          | LARGE                                                             |
| Up at 24 hrs | A_65_P01581 | 1.85 | 0.041 NM_009048.1 | Reps1         | UNKNOWN                                                           |
| Up at 24 hrs | A_65_P03839 | 1.85 | 0.033             |               | UNKNOWN                                                           |
| Up at 24 hrs | A_65_P08177 | 1.84 | 0.023             |               | UNKNOWN                                                           |
| Up at 24 hrs | A_65_P08308 | 1.84 | 0.009             |               | Intronic in U003894                                               |
| Up at 24 hrs | A_65_P02694 | 1.84 | 0.048 XM_178569.1 |               | Mus musculus hypothetical gene supported by BC030302 (LOC269897), |
| Up at 24 hrs | A_65_P05807 | 1.84 | 0.010 NM_029400.1 | 4921514I20Rik | VASOPRESSIN-ACTIVATED CALCIUM-MOBILIZING RECEPTOR (VACM-1) (CULLI |
| Up at 24 hrs | A_65_P07422 | 1.84 | 0.006 BC029814.1  | Fos           | Similar to: Mus musculus, FBJ osteosarcoma oncogene, clone MGC:36 |
| Up at 24 hrs | A_65_P16171 | 1.84 | 0.006             | D10Ert447e    | UNKNOWN                                                           |
| Up at 24 hrs | A_65_P02476 | 1.84 | 0.001 XM_132011.1 | D5Ert477e     | UNKNOWN                                                           |
| Up at 24 hrs | A_65_P03536 | 1.84 | 0.003             |               | Intronic in U028909                                               |
| Up at 24 hrs | A_65_P01797 | 1.84 | 0.013             |               | Intronic in U036273                                               |
| Up at 24 hrs | A_65_P04300 | 1.84 | 0.015             | 3110040N11Rik | UNKNOWN                                                           |
| Up at 24 hrs | A_65_P02283 | 1.84 | 0.003 XM_147448.1 |               | Mus musculus LOC216393 (LOC216393), mRNA                          |
| Up at 24 hrs | A_65_P03277 | 1.83 | 0.047 NM_009181.1 | Siat8b        | Mus musculus sialyltransferase 8 (alpha-2, 8-sialyltransferase) B |
| Up at 24 hrs | A_65_P17085 | 1.83 | 0.030 XM_138265.1 |               | UNKNOWN                                                           |
| Up at 24 hrs | A_65_P01421 | 1.83 | 0.049 NM_130735.1 | 3830402K23Rik | SYNAPTONEMAL COMPLEX                                              |
| Up at 24 hrs | A_65_P02269 | 1.83 | 0.001 AK018410.1  | 8430414L16Rik | Mus musculus 16 days embryo lung cDNA, RIKEN full-length enriched |
| Up at 24 hrs | A_65_P07353 | 1.83 | 0.025             |               | Intronic in U025194                                               |
| Up at 24 hrs | A_65_P02369 | 1.83 | 0.022             |               | UNKNOWN                                                           |
| Up at 24 hrs | A_65_P05448 | 1.83 | 0.014             |               | UNKNOWN                                                           |
| Up at 24 hrs | A_65_P05426 | 1.83 | 0.027             |               | Intronic in U015265                                               |
| Up at 24 hrs | A_65_P05681 | 1.82 | 0.033             | Rrbp1         | Mus musculus ribosome binding protein 1 (Rrbp1), mRNA             |
| Up at 24 hrs | A_65_P01813 | 1.82 | 0.028 XM_181394.1 | Col9a3        | Mus musculus opioid growth factor receptor (Ogrf), mRNA           |
| Up at 24 hrs | A_65_P03347 | 1.82 | 0.012             | C77713        | UNKNOWN                                                           |
| Up at 24 hrs | A_65_P02457 | 1.82 | 0.021             |               | UNKNOWN                                                           |
| Up at 24 hrs | A_65_P05177 | 1.82 | 0.024 XM_181410.1 | 6330503C17Rik | ZINC FINGER PROTEIN 261 E                                         |
| Up at 24 hrs | A_65_P09358 | 1.82 | 0.027             | 4930413O22Rik | Mus musculus RIKEN cDNA 4930413O22 gene (4930413O22Rik), mRNA     |
| Up at 24 hrs | A_65_P02064 | 1.82 | 0.003             |               | Intronic in U033898                                               |
| Up at 24 hrs | A_65_P02034 | 1.82 | 0.034             |               | UNKNOWN                                                           |

|              |             |      |       |             |               |                                                                    |
|--------------|-------------|------|-------|-------------|---------------|--------------------------------------------------------------------|
| Up at 24 hrs | A_65_P02266 | 1.82 | 0.016 | AJ243320.1  | Tm4sf10       | Mus musculus transmembrane 4 superfamily member 10 (Tm4sf10), mRNA |
| Up at 24 hrs | A_65_P07246 | 1.82 | 0.044 |             | Actr3         | UNKNOWN                                                            |
| Up at 24 hrs | A_65_P08153 | 1.82 | 0.028 | NM_008627.1 | Mrg2          | HOMEBOX PROTEIN                                                    |
| Up at 24 hrs | A_65_P03570 | 1.81 | 0.026 |             |               | UNKNOWN                                                            |
| Up at 24 hrs | A_65_P04225 | 1.81 | 0.037 | XM_129858.1 |               | TRANSCRIPTION FACTOR                                               |
| Up at 24 hrs | A_65_P02724 | 1.81 | 0.011 |             |               | Intronic in U016607                                                |
| Up at 24 hrs | A_65_P04394 | 1.81 | 0.007 | XM_129514.1 | Lamc1         | LAMININ GAMMA-1 CHAIN PRECURSOR (LAMININ B2 CHAIN). [Source:SWISS  |
| Up at 24 hrs | A_65_P07373 | 1.81 | 0.003 |             |               | Intronic in U033433                                                |
| Up at 24 hrs | A_65_P06642 | 1.81 | 0.010 | AK019159.1  | 2610028H22Rik | Intronic in U030942                                                |
| Up at 24 hrs | A_65_P03357 | 1.81 | 0.035 |             |               | Intronic in U042231                                                |
| Up at 24 hrs | A_65_P07552 | 1.81 | 0.021 |             |               | REPEAT-SEQUENCE                                                    |
| Up at 24 hrs | A_65_P08732 | 1.81 | 0.047 |             |               | UNKNOWN                                                            |
| Up at 24 hrs | A_65_P00540 | 1.81 | 0.042 |             | Zar1          | Similar to: Mus musculus zygote arrest 1 (Zar1), mRNA              |
| Up at 24 hrs | A_65_P07141 | 1.81 | 0.005 | NM_013534.1 | Grcb          | Mus musculus gene rich cluster, B gene (Grcb), mRNA                |
| Up at 24 hrs | A_65_P00810 | 1.81 | 0.014 | BC031505.1  | 8430406N16Rik | hypothetical Trp-Asp repeat (WD-repeat) structure containing prot  |
| Up at 24 hrs | A_65_P02870 | 1.80 | 0.022 | NM_020573.1 | Osbpl1a       | Mus musculus oxysterol binding protein-like 1A (Osbpl1a), mRNA     |
| Up at 24 hrs | A_65_P04405 | 1.80 | 0.030 | NM_009505.1 | Vegfa         | Mus musculus vascular endothelial growth factor A (Vegfa), mRNA    |
| Up at 24 hrs | A_65_P06982 | 1.80 | 0.037 | AK017916.1  | 5830410F13Rik | Intronic in U022294                                                |
| Up at 24 hrs | A_65_P02747 | 1.80 | 0.009 |             |               | hypothetical Aminoacyl-transfer RNA synthetases class-II containi  |
| Up at 24 hrs | A_65_P04746 | 1.80 | 0.030 | NM_007842.1 | Ddx9          | Mus musculus DEAD (aspartate-glutamate-alanine-aspartate) box pol  |
| Up at 24 hrs | A_65_P05894 | 1.80 | 0.032 |             |               | UNKNOWN                                                            |
| Up at 24 hrs | A_65_P06044 | 1.80 | 0.020 | NM_019541.1 | Cts8          | Mus musculus cathepsin 8 (Cts8), mRNA                              |
| Up at 24 hrs | A_65_P11344 | 1.80 | 0.027 |             | LOC234076     | UNKNOWN                                                            |
| Up at 24 hrs | A_65_P00914 | 1.80 | 0.015 |             |               | UNKNOWN                                                            |
| Up at 24 hrs | A_65_P01730 | 1.79 | 0.047 | XM_135273.2 |               | Similar to: Mus musculus, clone MGC:6827 IMAGE:2649084, mRNA, com  |
| Up at 24 hrs | A_65_P01889 | 1.79 | 0.004 | XM_134648.1 | 3526401K03Rik | SORTING NEXIN                                                      |
| Up at 24 hrs | A_65_P02370 | 1.79 | 0.022 | NM_009903.1 | Cldn4         | Mus musculus claudin 4 (Cldn4), mRNA                               |
| Up at 24 hrs | A_65_P08505 | 1.79 | 0.045 |             |               | UNKNOWN                                                            |
| Up at 24 hrs | A_65_P07793 | 1.79 | 0.025 |             |               | Intronic in U006368                                                |
| Up at 24 hrs | A_65_P06124 | 1.79 | 0.041 |             |               | Intronic in U014346                                                |
| Up at 24 hrs | A_65_P01335 | 1.79 | 0.023 | NM_011917.1 | Xrn2          | Mus musculus 5-3 exoribonuclease 2 (Xrn2), mRNA                    |
| Up at 24 hrs | A_65_P07637 | 1.79 | 0.012 |             |               | REPEAT-SEQUENCE                                                    |
| Up at 24 hrs | A_65_P02198 | 1.78 | 0.018 |             |               | Intronic in U001165                                                |
| Up at 24 hrs | A_65_P00620 | 1.78 | 0.044 |             | 1110046B24Rik | SELENIDE, WATER DIKINASE EC 2.7.9.3 SELENOPHOSPHATE SYNTHETASE SEL |
| Up at 24 hrs | A_65_P04972 | 1.78 | 0.044 |             | R75548        | VESICLE-ASSOCIATED MEMBRANE PROTEIN, ASSOCIATED PROTEIN B AND C;   |
| Up at 24 hrs | A_65_P01789 | 1.78 | 0.049 |             |               | UNKNOWN                                                            |
| Up at 24 hrs | A_65_P06967 | 1.78 | 0.027 | XM_144221.1 |               | Similar to: Mus musculus similar to hypothetical protein MGC19022  |
| Up at 24 hrs | A_65_P12782 | 1.78 | 0.026 |             |               | Similar to: Mus musculus 16 days embryo head cDNA, RIKEN full-len  |
| Up at 24 hrs | A_65_P09568 | 1.78 | 0.015 | XM_131025.2 | 4930415M08Rik | UNKNOWN                                                            |
| Up at 24 hrs | A_65_P11587 | 1.78 | 0.042 |             |               | UNKNOWN                                                            |
| Up at 24 hrs | A_65_P05724 | 1.78 | 0.022 | BC022465.1  |               | Cross Reactive                                                     |
| Up at 24 hrs | A_65_P00814 | 1.78 | 0.023 |             | Usp14         | Mus musculus hypothetical protein MGC28284 (MGC28284), mRNA        |
| Up at 24 hrs | A_65_P09228 | 1.78 | 0.021 | NM_016812.1 | Banp          | Mus musculus Btg3 associated nuclear protein (Banp), mRNA          |
| Up at 24 hrs | A_65_P04162 | 1.77 | 0.034 |             |               | UNKNOWN                                                            |
| Up at 24 hrs | A_65_P00947 | 1.77 | 0.015 |             |               | UNKNOWN                                                            |
| Up at 24 hrs | A_65_P02583 | 1.77 | 0.026 |             | Vps26         | Mus musculus vacuolar protein sorting 26 (yeast) (Vps26), mRNA     |
| Up at 24 hrs | A_65_P01697 | 1.77 | 0.028 |             |               | UNKNOWN                                                            |
| Up at 24 hrs | A_65_P02695 | 1.77 | 0.015 | NM_011427.1 | Snai1         | Mus musculus snail homolog 1, (Drosophila) (Snai1), mRNA           |
| Up at 24 hrs | A_65_P10064 | 1.77 | 0.030 |             |               | Intronic in U042309                                                |
| Up at 24 hrs | A_65_P10887 | 1.77 | 0.007 |             |               | UNKNOWN                                                            |
| Up at 24 hrs | A_65_P03501 | 1.77 | 0.044 | NM_145709.1 | Obox5         | OBOX2 homolog [Mus musculus]                                       |
| Up at 24 hrs | A_65_P01462 | 1.77 | 0.005 | AL831908.1  | Eif2c4        | EUKARYOTIC TRANSLATION INITIATION FACTOR 2C 2 EIF2C 2 EIF 2C       |
| Up at 24 hrs | A_65_P10443 | 1.77 | 0.027 |             |               | UNKNOWN                                                            |
| Up at 24 hrs | A_65_P05861 | 1.77 | 0.038 |             |               | UNKNOWN                                                            |
| Up at 24 hrs | A_65_P13338 | 1.77 | 0.031 |             |               | Intronic in U017227                                                |
| Up at 24 hrs | A_65_P03736 | 1.77 | 0.043 | NM_009207.1 | Slc4a2        | Mus musculus solute carrier family 4 (anion exchanger), member 2   |
| Up at 24 hrs | A_65_P06326 | 1.77 | 0.017 |             |               | UNKNOWN                                                            |
| Up at 24 hrs | A_65_P03900 | 1.76 | 0.015 | BC037805.1  | AU022875      | UNKNOWN                                                            |

|              |             |      |                   |               |                                                                   |
|--------------|-------------|------|-------------------|---------------|-------------------------------------------------------------------|
| Up at 24 hrs | A_65_P04814 | 1.76 | 0.026             | Prtb          | Mus musculus telomeric repeat binding factor 2 (Terf2), mRNA      |
| Up at 24 hrs | A_65_P07810 | 1.76 | 0.014 XM_049683.4 |               | UNKNOWN                                                           |
| Up at 24 hrs | A_65_P03606 | 1.76 | 0.040             | AW060207      | Mus musculus hypothetical protein MGC27814 (MGC27814), mRNA       |
| Up at 24 hrs | A_65_P00901 | 1.76 | 0.015             | Cpe           | hypothetical Intermediate filament proteins containing protein    |
| Up at 24 hrs | A_65_P02488 | 1.76 | 0.010 XM_134981.1 |               | UNKNOWN                                                           |
| Up at 24 hrs | A_65_P08680 | 1.76 | 0.008             |               | UNKNOWN                                                           |
| Up at 24 hrs | A_65_P02659 | 1.75 | 0.010 BC021370.1  | 2610016F01Rik | REPEAT-SEQUENCE                                                   |
| Up at 24 hrs | A_65_P04833 | 1.75 | 0.038             |               | UNKNOWN                                                           |
| Up at 24 hrs | A_65_P17073 | 1.75 | 0.027             | AA589509      | Mus musculus EST AA589509 (AA589509), mRNA                        |
| Up at 24 hrs | A_65_P01900 | 1.75 | 0.001 NM_153156.1 | Stoml3        | Mus musculus stomatin (Epb7.2)-like 3 (Stoml3), mRNA              |
| Up at 24 hrs | A_65_P03631 | 1.75 | 0.019             |               | Intronic in U011599                                               |
| Up at 24 hrs | A_65_P06511 | 1.75 | 0.013 XM_145304.2 | 4930401F20    | weakly similar to CYTOCHROME C OXIDASE POLYPEPTIDE VIB (EC 1.9.3. |
| Up at 24 hrs | A_65_P18640 | 1.75 | 0.039             |               | Intronic in U027655                                               |
| Up at 24 hrs | A_65_P01171 | 1.75 | 0.032             |               | Intronic in U036504                                               |
| Up at 24 hrs | A_65_P04975 | 1.75 | 0.008             | AA959934      | Mus musculus hypothetical protein MGC11993 (MGC11993), mRNA       |
| Up at 24 hrs | A_65_P01799 | 1.75 | 0.012             |               | UNKNOWN                                                           |
| Up at 24 hrs | A_65_P03956 | 1.75 | 0.040 XM_149933.1 | 6720469B10    | Mus musculus similar to hypothetical protein FLJ21924 [Homo sapie |
| Up at 24 hrs | A_65_P01811 | 1.74 | 0.014             |               | Intronic in U023104                                               |
| Up at 24 hrs | A_65_P04779 | 1.74 | 0.047             |               | Intronic in U039263                                               |
| Up at 24 hrs | A_65_P14608 | 1.74 | 0.046             | Pex1          | PEROXISOME BIOGENESIS FACTOR 1 PEROXIN 1 PEROXISOME BIOGENESIS DI |
| Up at 24 hrs | A_65_P05747 | 1.74 | 0.036 NM_009393.1 | Tncc          | Mus musculus troponin C, cardiac/slow skeletal (Tncc), mRNA       |
| Up at 24 hrs | A_65_P05941 | 1.74 | 0.001             | C77823        | UNKNOWN                                                           |
| Up at 24 hrs | A_65_P06446 | 1.74 | 0.018 NM_011638.1 | Trfr          | Mus musculus transferrin receptor (Trfr), mRNA                    |
| Up at 24 hrs | A_65_P11080 | 1.74 | 0.043             |               | UNKNOWN                                                           |
| Up at 24 hrs | A_65_P01796 | 1.74 | 0.034 NM_131907.1 | AW061228      | SODIUM/POTASSIUM TRANSPORTING ATPASE ALPHA CHAIN EC 3.6.3.9 SODIU |
| Up at 24 hrs | A_65_P05856 | 1.74 | 0.039             |               | Intronic in U014782                                               |
| Up at 24 hrs | A_65_P12182 | 1.74 | 0.001 L15435.1    | Tnfsf9        | Mus musculus tumor necrosis factor (ligand) superfamily, member 9 |
| Up at 24 hrs | A_65_P06120 | 1.74 | 0.035             |               | UNKNOWN                                                           |
| Up at 24 hrs | A_65_P08765 | 1.74 | 0.044 XM_128727.2 | 6330576B01Rik | F-BOX PROTEIN FBX13 (FRAGMENT). [Source:SPTREMBL;Acc:Q9QZN1]      |
| Up at 24 hrs | A_65_P00741 | 1.74 | 0.010             | Slc12a1       | Mus musculus solute carrier family 12, member 1 (Slc12a1), mRNA   |
| Up at 24 hrs | A_65_P09400 | 1.74 | 0.014             | Tsnax         | Mus musculus translin-associated factor X (Tsnax), mRNA           |
| Up at 24 hrs | A_65_P03160 | 1.73 | 0.016 NM_009601.2 | Chrb1         | Mus musculus cholinergic receptor, nicotinic, beta polypeptide 1  |
| Up at 24 hrs | A_65_P05662 | 1.73 | 0.019 NM_025405.1 | 1110033J19Rik | Mus musculus RIKEN cDNA 1110033J19 gene (1110033J19Rik), mRNA     |
| Up at 24 hrs | A_65_P07804 | 1.73 | 0.019 XM_130354.1 |               | Similar to: Mus musculus similar to HYPOTHETICAL PROTEIN DJ845O24 |
| Up at 24 hrs | A_65_P02008 | 1.73 | 0.016             | AU022320      | Intronic in U024266                                               |
| Up at 24 hrs | A_65_P04295 | 1.73 | 0.002             |               | Intronic in U043709                                               |
| Up at 24 hrs | A_65_P05435 | 1.73 | 0.013             |               | Intronic in U036005                                               |
| Up at 24 hrs | A_65_P05783 | 1.73 | 0.044 BC037447.1  | 4631427C17Rik | Mus musculus RIKEN cDNA 4631427C17 gene (4631427C17Rik), mRNA     |
| Up at 24 hrs | A_65_P01608 | 1.72 | 0.007 NM_007936.1 | Epha4         | Mus musculus Eph receptor A4 (Epha4), mRNA                        |
| Up at 24 hrs | A_65_P06411 | 1.72 | 0.012 NM_010549.1 | Il11ra1       | Mus musculus interleukin 11 receptor, alpha chain 2 (Il11ra2), mR |
| Up at 24 hrs | A_65_P04071 | 1.72 | 0.040             |               | CORE PROTEIN PRECURSOR PROTEOGLYCAN CORE PROTEIN                  |
| Up at 24 hrs | A_65_P02030 | 1.72 | 0.035             | AU022479      | UNKNOWN                                                           |
| Up at 24 hrs | A_65_P10668 | 1.72 | 0.020 NM_144843.1 | MGC27983      | Mus musculus hypothetical protein MGC27983 (MGC27983), mRNA       |
| Up at 24 hrs | A_65_P03002 | 1.72 | 0.033             |               | Intronic in U043633                                               |
| Up at 24 hrs | A_65_P10383 | 1.72 | 0.037             | Tcea1         | Intronic in U021882                                               |
| Up at 24 hrs | A_65_P03053 | 1.71 | 0.013 XM_131205.2 | Ddah1         | NG,NG DIMETHYLARGININE DIMETHYLAMINOHYDROLASE 1 EC 3.5.3.18 DIMET |
| Up at 24 hrs | A_65_P04558 | 1.71 | 0.019 NM_145491.1 | Tc10-pending  | Mus musculus phosphatidylinositol glycan, class F (Pigf), mRNA    |
| Up at 24 hrs | A_65_P07337 | 1.71 | 0.004             | Ate1          | Mus musculus arginine-tRNA-protein transferase 1 (Ate1), mRNA     |
| Up at 24 hrs | A_65_P06790 | 1.71 | 0.008             | Catns         | Mus musculus catenin src (Catns), mRNA                            |
| Up at 24 hrs | A_65_P06859 | 1.71 | 0.020 NM_008144.3 | Gng3lg        | Mus musculus G protein gamma 3 linked gene (Gng3lg), mRNA         |
| Up at 24 hrs | A_65_P03487 | 1.71 | 0.047             |               | UNKNOWN                                                           |
| Up at 24 hrs | A_65_P00723 | 1.71 | 0.010 NM_152808.1 | 1110028E10Rik | weakly similar to CTL2 PROTEIN [Homo sapiens]                     |
| Up at 24 hrs | A_65_P01988 | 1.70 | 0.012 NM_018818.1 | Chm           | Mus musculus choroideremia (Chm), mRNA                            |
| Up at 24 hrs | A_65_P00837 | 1.70 | 0.030 NM_009166.1 | Sorbs1        | Mus musculus sorbin and SH3 domain containing 1 (Sorbs1), mRNA    |
| Up at 24 hrs | A_65_P01149 | 1.70 | 0.017 NM_010216.1 | Figf          | Mus musculus c-fos induced growth factor (Figf), mRNA             |
| Up at 24 hrs | A_65_P03014 | 1.70 | 0.037             |               | REPEAT-SEQUENCE                                                   |
| Up at 24 hrs | A_65_P02003 | 1.70 | 0.019             |               | Intronic in U023123                                               |
| Up at 24 hrs | A_65_P14336 | 1.70 | 0.017             |               | UNKNOWN                                                           |

|              |             |      |                   |               |                                                                    |
|--------------|-------------|------|-------------------|---------------|--------------------------------------------------------------------|
| Up at 24 hrs | A_65_P08188 | 1.70 | 0.013 NM_013582.1 | Lhcgr         | Mus musculus luteinizing hormone/choriogonadotropin receptor (Lhc  |
| Up at 24 hrs | A_65_P04088 | 1.70 | 0.014             |               | Intronic in U002843                                                |
| Up at 24 hrs | A_65_P02298 | 1.70 | 0.013             | D6ErtD131e    | Intronic in U042770                                                |
| Up at 24 hrs | A_65_P06321 | 1.70 | 0.028             |               | Intronic in U021257                                                |
| Up at 24 hrs | A_65_P07723 | 1.70 | 0.032             |               | REPEAT-SEQUENCE                                                    |
| Up at 24 hrs | A_65_P01906 | 1.69 | 0.005             | Ncor1         | Mus musculus nuclear receptor co-repressor 1 (Ncor1), mRNA         |
| Up at 24 hrs | A_65_P02085 | 1.69 | 0.031 NM_153404.1 | Liph          | Mus musculus lipase, member H (Liph), mRNA                         |
| Up at 24 hrs | A_65_P01023 | 1.69 | 0.032 XM_131638.2 | D4ErtD222e    | weakly similar to GASC-1 PROTEIN [Homo sapiens]                    |
| Up at 24 hrs | A_65_P01817 | 1.69 | 0.005 XM_128416.1 | qk            | Mus musculus quaking (qk), mRNA                                    |
| Up at 24 hrs | A_65_P04254 | 1.69 | 0.037             | AU022554      | Intronic in U032656                                                |
| Up at 24 hrs | A_65_P02822 | 1.69 | 0.031             | A1839635      | similar to SIMILAR TO ZINC FINGER PROTEIN 101 [Mus musculus]       |
| Up at 24 hrs | A_65_P09153 | 1.69 | 0.039 XM_136081.2 | Col4a5        | COLLAGEN ALPHA CHAIN                                               |
| Up at 24 hrs | A_65_P02010 | 1.69 | 0.009 NM_009260.1 | Spnb2         | Mus musculus beta-spectrin 2, non-erythrocytic (Spnb2), mRNA       |
| Up at 24 hrs | A_65_P04017 | 1.69 | 0.008             |               | Intronic in U004382                                                |
| Up at 24 hrs | A_65_P04204 | 1.69 | 0.004             | D2ErtD485e    | HSPC129 {Homo sapiens}                                             |
| Up at 24 hrs | A_65_P04469 | 1.69 | 0.028 XM_148908.1 |               | ADULT MALE TESTIS CDNA, RIKEN FULL-LENGTH ENRICHED LIBRARY, CLONE  |
| Up at 24 hrs | A_65_P05967 | 1.69 | 0.010 XM_133656.1 | 2410142G14Rik | DNA POLYMERASE DELTA SUBUNIT 3 (DNA POLYMERASE DELTA SUBUNIT P66)  |
| Up at 24 hrs | A_65_P02156 | 1.69 | 0.045 NM_010554.1 | Il1a          | Mus musculus interleukin 1 alpha (Il1a), mRNA                      |
| Up at 24 hrs | A_65_P06284 | 1.69 | 0.030             |               | UNKNOWN                                                            |
| Up at 24 hrs | A_65_P06617 | 1.69 | 0.008 AK009735.1  | Ap2a2         | Mus musculus adaptor protein complex AP-2, alpha 2 subunit (Ap2a2) |
| Up at 24 hrs | A_65_P01931 | 1.69 | 0.016             |               | Intronic in U029119                                                |
| Up at 24 hrs | A_65_P04280 | 1.69 | 0.003             | 2210415K03Rik | UNKNOWN                                                            |
| Up at 24 hrs | A_65_P02411 | 1.68 | 0.048 XM_125972.2 | D11Bwg0280e   | DNA segment, Chr 11, Brigham & Womens Genetics 0280e expressed     |
| Up at 24 hrs | A_65_P03033 | 1.68 | 0.013 NM_146170.1 | MGC25529      | Mus musculus hypothetical protein MGC25529 (MGC25529), mRNA        |
| Up at 24 hrs | A_65_P03899 | 1.68 | 0.034 NM_010062.1 | Dnase2a       | Mus musculus deoxyribonuclease II alpha (Dnase2a), mRNA            |
| Up at 24 hrs | A_65_P06248 | 1.68 | 0.030             |               | Intronic in U021255                                                |
| Up at 24 hrs | A_65_P00770 | 1.68 | 0.007             |               | UNKNOWN                                                            |
| Up at 24 hrs | A_65_P03548 | 1.68 | 0.017             | 2410141F18Rik | UNKNOWN                                                            |
| Up at 24 hrs | A_65_P19487 | 1.68 | 0.007             |               | Intronic in U018825                                                |
| Up at 24 hrs | A_65_P02104 | 1.68 | 0.000             |               | UNKNOWN                                                            |
| Up at 24 hrs | A_65_P09570 | 1.68 | 0.023             |               | Intronic in U021961                                                |
| Up at 24 hrs | A_65_P17760 | 1.68 | 0.029 BC005486.1  | Ets2          | Mus musculus E26 avian leukemia oncogene 2, 3 domain (Ets2), mRNA  |
| Up at 24 hrs | A_65_P02452 | 1.68 | 0.021 NM_026295.1 | 4930563P03Rik | Mus musculus RIKEN cDNA 4930563P03 gene (4930563P03Rik), mRNA      |
| Up at 24 hrs | A_65_P01934 | 1.68 | 0.024 NM_013905.1 | Heyl          | Mus musculus hairy/enhancer-of-split related with YRPW motif-like  |
| Up at 24 hrs | A_65_P03509 | 1.67 | 0.021             |               | UNKNOWN                                                            |
| Up at 24 hrs | A_65_P08947 | 1.67 | 0.049 XM_133156.1 |               | UNKNOWN                                                            |
| Up at 24 hrs | A_65_P02796 | 1.67 | 0.020             | A930036P18Rik | UNKNOWN                                                            |
| Up at 24 hrs | A_65_P03196 | 1.67 | 0.041             |               | Similar to: Homo sapiens mRNA for KIAA1816 protein, partial cds    |
| Up at 24 hrs | A_65_P05248 | 1.67 | 0.036 BC037894.1  | 1100001F19Rik | UBIQUITIN-CONJUGATING ENZYME E2-17 KDA 3 (EC 6.3.2.19) (UBIQUITIN  |
| Up at 24 hrs | A_65_P08157 | 1.67 | 0.012 NM_172564.1 | 9930017A07    | similar to CDNA FLJ14950 FIS, CLONE PLACE2000371, WEAKLY SIMILAR   |
| Up at 24 hrs | A_65_P08186 | 1.67 | 0.020             | C81086        | Intronic in U015182                                                |
| Up at 24 hrs | A_65_P08367 | 1.67 | 0.048 XM_130406.1 | Blvra         | Mus musculus RIKEN cDNA 0610006A11 gene (0610006A11Rik), mRNA      |
| Up at 24 hrs | A_65_P02500 | 1.67 | 0.015 AL109700.1  |               | UNKNOWN                                                            |
| Up at 24 hrs | A_65_P04544 | 1.67 | 0.022 XM_126866.2 | 3110039L19Rik | UNKNOWN                                                            |
| Up at 24 hrs | A_65_P05774 | 1.67 | 0.049             |               | Intronic in U029794                                                |
| Up at 24 hrs | A_65_P07164 | 1.67 | 0.011             |               | REPEAT-SEQUENCE                                                    |
| Up at 24 hrs | A_65_P08193 | 1.67 | 0.001             |               | Intronic in U023925                                                |
| Up at 24 hrs | A_65_P01329 | 1.67 | 0.029 AK010104.1  | 2310068C19Rik | Intronic in U035709                                                |
| Up at 24 hrs | A_65_P10267 | 1.66 | 0.030 NM_021331.1 | G6pc-rs       | Mus musculus glucose-6-phosphatase, catalytic, related sequence (  |
| Up at 24 hrs | A_65_P11549 | 1.66 | 0.026             | 4930453N24Rik | SIMILAR TO RIKEN CDNA N24                                          |
| Up at 24 hrs | A_65_P01241 | 1.66 | 0.008             |               | Intronic in U009865                                                |
| Up at 24 hrs | A_65_P02979 | 1.66 | 0.020             | IAN6          | Mus musculus immune-associated nucleotide 6 (IAN6), mRNA           |
| Up at 24 hrs | A_65_P03710 | 1.66 | 0.001             |               | UNKNOWN                                                            |
| Up at 24 hrs | A_65_P01411 | 1.65 | 0.015 NM_023047.1 | Crmp5-pending | Mus musculus collapsin response mediator protein 5 (Crmp5-pending  |
| Up at 24 hrs | A_65_P17560 | 1.65 | 0.001             | Tmod3         | Mus musculus tropomodulin 3 (Tmod3), mRNA                          |
| Up at 24 hrs | A_65_P01775 | 1.65 | 0.047             |               | Intronic in U036161                                                |
| Up at 24 hrs | A_65_P03644 | 1.65 | 0.024 NM_010365.1 | Gtf2i         | UNKNOWN                                                            |
| Up at 24 hrs | A_65_P06316 | 1.65 | 0.027             |               | UNKNOWN                                                            |

|              |             |      |                   |               |                                                                   |
|--------------|-------------|------|-------------------|---------------|-------------------------------------------------------------------|
| Up at 24 hrs | A_65_P03733 | 1.65 | 0.031 NM_021567.1 | Pcbp4         | Mus musculus poly(rC) binding protein 4 (Pcbp4), mRNA             |
| Up at 24 hrs | A_65_P04626 | 1.65 | 0.037             |               | similar to NEPRILYSIN-LIKE PEPTIDASE GAMMA [Mus musculus]         |
| Up at 24 hrs | A_65_P01983 | 1.65 | 0.047             |               | Intronic in U021175                                               |
| Up at 24 hrs | A_65_P03006 | 1.65 | 0.044             |               | UNKNOWN                                                           |
| Up at 24 hrs | A_65_P02119 | 1.64 | 0.040 AF521883.1  | 4933432B13Rik | REPEAT-SEQUENCE                                                   |
| Up at 24 hrs | A_65_P05041 | 1.64 | 0.019             |               | UNKNOWN                                                           |
| Up at 24 hrs | A_65_P01798 | 1.64 | 0.024 AJ341786.1  |               | UNKNOWN                                                           |
| Up at 24 hrs | A_65_P01520 | 1.64 | 0.033 XM_131228.2 |               | weakly similar to SEROLOGICALLY DEFINED BREAST CANCER ANTIGEN NY- |
| Up at 24 hrs | A_65_P04596 | 1.64 | 0.024             |               | UNKNOWN                                                           |
| Up at 24 hrs | A_65_P01893 | 1.64 | 0.018             |               | UNKNOWN                                                           |
| Up at 24 hrs | A_65_P04402 | 1.64 | 0.030 NM_008501.1 | Lif           | Mus musculus leukemia inhibitory factor (Lif), mRNA               |
| Up at 24 hrs | A_65_P05563 | 1.64 | 0.002 NM_025938.1 | 2610511E03Rik | Mus musculus RIKEN cDNA 2610511E03 gene (2610511E03Rik), mRNA     |
| Up at 24 hrs | A_65_P01630 | 1.64 | 0.028 NM_008988.1 |               | UNKNOWN                                                           |
| Up at 24 hrs | A_65_P06503 | 1.63 | 0.041 XM_135771.2 | 4432411B18    | T54                                                               |
| Up at 24 hrs | A_65_P13180 | 1.63 | 0.048             |               | UNKNOWN                                                           |
| Up at 24 hrs | A_65_P03939 | 1.63 | 0.040             |               | CDNA FIS, CLONE , WEAKLY SIMILAR TO LYTECHINUS VARIEGATUS EMBRYON |
| Up at 24 hrs | A_65_P04003 | 1.63 | 0.008 NM_016776.1 | Mybbp1a       | Mus musculus MYB binding protein (P160) 1a (Mybbp1a), mRNA        |
| Up at 24 hrs | A_65_P03544 | 1.63 | 0.009             |               | UNKNOWN                                                           |
| Up at 24 hrs | A_65_P06023 | 1.63 | 0.022 XM_131652.1 | 2510006D16Rik | Mus musculus RIKEN cDNA 2510006D16 gene (2510006D16Rik), mRNA     |
| Up at 24 hrs | A_65_P03772 | 1.63 | 0.009             |               | Intronic in U022723                                               |
| Up at 24 hrs | A_65_P00554 | 1.63 | 0.024 XM_147881.1 |               | PROTEIN ASSOCIATED WITH                                           |
| Up at 24 hrs | A_65_P00630 | 1.63 | 0.011 NM_144784.1 | Acat1         | Mus musculus acetyl-Coenzyme A acetyltransferase 1 (Acat1), mRNA  |
| Up at 24 hrs | A_65_P06798 | 1.62 | 0.029             |               | Intronic in U009853                                               |
| Up at 24 hrs | A_65_P12391 | 1.62 | 0.043 NM_016681.1 | Rad53         | Mus musculus RAD53 homolog (S. cerevisiae) (Rad53), mRNA          |
| Up at 24 hrs | A_65_P06713 | 1.62 | 0.004             | Hspa8         | Intronic in U038900                                               |
| Up at 24 hrs | A_65_P02775 | 1.62 | 0.003             |               | Intronic in U043846                                               |
| Up at 24 hrs | A_65_P05026 | 1.62 | 0.035             |               | UNKNOWN                                                           |
| Up at 24 hrs | A_65_P08691 | 1.62 | 0.019 XM_134827.2 | Sor1          | SORTILIN-RELATED RECEPTOR PRECURSOR (SORTING PROTEIN-RELATED RECE |
| Up at 24 hrs | A_65_P11056 | 1.62 | 0.025 XM_126299.1 |               | Mus musculus similar to TIM1 [Mus musculus] (LOC210535), mRNA     |
| Up at 24 hrs | A_65_P04696 | 1.62 | 0.024             |               | UNKNOWN                                                           |
| Up at 24 hrs | A_65_P03045 | 1.62 | 0.009             |               | Intronic in U027546                                               |
| Up at 24 hrs | A_65_P01423 | 1.62 | 0.007             | Asc           | Mus musculus apoptosis-associated speck-like protein containing a |
| Up at 24 hrs | A_65_P03830 | 1.62 | 0.011             |               | UNKNOWN                                                           |
| Up at 24 hrs | A_65_P07717 | 1.62 | 0.013             |               | Intronic in U042490                                               |
| Up at 24 hrs | A_65_P03359 | 1.62 | 0.029 NM_013586.1 | Loxl3         | Mus musculus lysyl oxidase-like 3 (Loxl3), mRNA                   |
| Up at 24 hrs | A_65_P10038 | 1.62 | 0.004             | Spry1         | Mus musculus sprouty homolog 1 (Drosophila) (Spry1), mRNA         |
| Up at 24 hrs | A_65_P01381 | 1.62 | 0.029             | Ccrn4l        | UNKNOWN                                                           |
| Up at 24 hrs | A_65_P02222 | 1.62 | 0.018 AF151173.2  | Igf2r         | Intronic in U017499                                               |
| Up at 24 hrs | A_65_P03973 | 1.62 | 0.038 NM_002742.1 | Prkcm         | Mus musculus protein kinase C, mu (Prkcm), mRNA                   |
| Up at 24 hrs | A_65_P01562 | 1.61 | 0.006             |               | Intronic in U019547                                               |
| Up at 24 hrs | A_65_P06422 | 1.61 | 0.021             |               | UNKNOWN                                                           |
| Up at 24 hrs | A_65_P02663 | 1.61 | 0.011             |               | REPEAT-SEQUENCE                                                   |
| Up at 24 hrs | A_65_P07911 | 1.61 | 0.014 NM_011262.1 | Req           | Mus musculus requiem (Req), mRNA                                  |
| Up at 24 hrs | A_65_P00592 | 1.61 | 0.046             |               | UNKNOWN                                                           |
| Up at 24 hrs | A_65_P07266 | 1.61 | 0.008             |               | UNKNOWN                                                           |
| Up at 24 hrs | A_65_P01896 | 1.61 | 0.021 XM_126912.2 |               | weakly similar to HYPOTHETICAL 80.5 KDA PROTEIN [Homo sapiens]    |
| Up at 24 hrs | A_65_P00867 | 1.60 | 0.025             | 5730511K23Rik | UNKNOWN                                                           |
| Up at 24 hrs | A_65_P01736 | 1.60 | 0.016 XM_125794.2 | 1700129L13Rik | HOST CELL FACTOR C1 HCF VP16 ACCESSORY PROTEIN HFC1 VCAF          |
| Up at 24 hrs | A_65_P01932 | 1.60 | 0.016             | AA407175      | UNKNOWN                                                           |
| Up at 24 hrs | A_65_P04995 | 1.60 | 0.049 XM_141714.1 |               | NOVEL PROTEIN SIMILAR TO AND                                      |
| Up at 24 hrs | A_65_P04745 | 1.60 | 0.026 NM_054040.1 | Tulp4         | TUBBY SUPERFAMILY                                                 |
| Up at 24 hrs | A_65_P01298 | 1.60 | 0.011 BC033416.1  | Il1r1         | Mus musculus interleukin 1 receptor-like 1 (Il1r1), mRNA          |
| Up at 24 hrs | A_65_P04000 | 1.60 | 0.041             |               | Intronic in U010727                                               |
| Up at 24 hrs | A_65_P06669 | 1.60 | 0.045             |               | UNKNOWN                                                           |
| Up at 24 hrs | A_65_P03626 | 1.60 | 0.005             |               | UNKNOWN                                                           |
| Up at 24 hrs | A_65_P03511 | 1.60 | 0.011 XM_139376.1 | 0610007N19Rik | RIKEN cDNA 0610007N19 gene                                        |
| Up at 24 hrs | A_65_P04107 | 1.60 | 0.019 NM_145125.1 | Wdr9          | REPEAT-SEQUENCE                                                   |
| Up at 24 hrs | A_65_P09853 | 1.60 | 0.016             |               | Intronic in U018570                                               |

|              |             |      |                   |               |                                                                    |
|--------------|-------------|------|-------------------|---------------|--------------------------------------------------------------------|
| Up at 24 hrs | A_65_P02183 | 1.60 | 0.003             |               | REPEAT-SEQUENCE                                                    |
| Up at 24 hrs | A_65_P02301 | 1.60 | 0.002 NM_172749.1 | 6820429M01    | similar to HYPOTHETICAL ZINC FINGER PROTEIN KIAA0296 [Homo sapien  |
| Up at 24 hrs | A_65_P02847 | 1.60 | 0.017 NM_029600.1 | Abcc3         | MULTIDRUG RESISTANCE ASSOCIATED PROTEIN                            |
| Up at 24 hrs | A_65_P04142 | 1.60 | 0.027             | Map3k14       | Mus musculus mitogen-activated protein kinase kinase kinase 14 (M  |
| Up at 24 hrs | A_65_P08311 | 1.60 | 0.026             | A1848218      | UNKNOWN                                                            |
| Up at 24 hrs | A_65_P01950 | 1.60 | 0.018 NM_019570.1 | Rev1l         | Mus musculus REV1-like ( <i>S. cerevisiae</i> ) (Rev1l), mRNA      |
| Up at 24 hrs | A_65_P04870 | 1.59 | 0.019 NM_016919.1 | Col5a3        | Mus musculus procollagen, type V, alpha 3 (Col5a3), mRNA           |
| Up at 24 hrs | A_65_P02108 | 1.59 | 0.031             | Mcpr          | Mus musculus meiotic check point regulator (Mcpr), mRNA            |
| Up at 24 hrs | A_65_P03241 | 1.59 | 0.024 NM_009260.1 | Spnb2         | Mus musculus beta-spectrin 2, non-erythrocytic (Spnb2), mRNA       |
| Up at 24 hrs | A_65_P10588 | 1.59 | 0.001             |               | UNKNOWN                                                            |
| Up at 24 hrs | A_65_P06486 | 1.59 | 0.026 NM_026842.3 | Ubqln1        | Mus musculus ubiquilin 1 (Ubqln1), transcript variant 1, mRNA      |
| Up at 24 hrs | A_65_P02182 | 1.58 | 0.031             | D1Erd148e     | UNKNOWN                                                            |
| Up at 24 hrs | A_65_P03660 | 1.58 | 0.013 BC026001.1  | Phc3          | Mus musculus polyhomeotic 3 (Phc3), mRNA                           |
| Up at 24 hrs | A_65_P02479 | 1.58 | 0.006 NM_133791.1 | D8Erd594e     | Mus musculus DNA segment, Chr 8, ERATO Doi 594, expressed (D8Erd   |
| Up at 24 hrs | A_65_P12458 | 1.58 | 0.027             |               | Intronic in U003009                                                |
| Up at 24 hrs | A_65_P09918 | 1.58 | 0.030             |               | THYROID RECEPTOR INTERACTING PROTEIN 11 TRIP 11                    |
| Up at 24 hrs | A_65_P03262 | 1.58 | 0.003 XM_134202.1 | 5031419I10Rik | similar to GEM-INTERACTING PROTEIN [Homo sapiens]                  |
| Up at 24 hrs | A_65_P01419 | 1.58 | 0.016             | AU015741      | UNKNOWN                                                            |
| Up at 24 hrs | A_65_P03350 | 1.58 | 0.041             | Arl2          | Mus musculus ADP-ribosylation-like 2 (Arl2), mRNA                  |
| Up at 24 hrs | A_65_P05183 | 1.58 | 0.028             |               | Intronic in U007294                                                |
| Up at 24 hrs | A_65_P06980 | 1.58 | 0.044 BC008617.1  |               | Mus musculus, clone IMAGE:3588380, mRNA, partial cds               |
| Up at 24 hrs | A_65_P08382 | 1.58 | 0.018             |               | Intronic in U007008                                                |
| Up at 24 hrs | A_65_P04629 | 1.57 | 0.017             |               | UNKNOWN                                                            |
| Up at 24 hrs | A_65_P02946 | 1.57 | 0.038 NM_172911.1 | 9830148H23    | hypothetical Protein kinase-like (PK-like) structure containing p  |
| Up at 24 hrs | A_65_P11934 | 1.57 | 0.043             |               | UNKNOWN                                                            |
| Up at 24 hrs | A_65_P15172 | 1.57 | 0.020 XM_129928.1 | 4631423F02Rik | KELCH LIKE PROTEIN                                                 |
| Up at 24 hrs | A_65_P03742 | 1.57 | 0.019             | Pik3c2a       | Mus musculus phosphatidylinositol 3-kinase, C2 domain containing,  |
| Up at 24 hrs | A_65_P01648 | 1.57 | 0.009 NM_030700.1 | Maged2        | Mus musculus melanoma antigen, family D, 2 (Maged2), mRNA          |
| Up at 24 hrs | A_65_P02748 | 1.57 | 0.013 XM_126426.1 | LOC216850     | REPEAT-SEQUENCE                                                    |
| Up at 24 hrs | A_65_P05279 | 1.57 | 0.026             | Ctsb          | Intronic in U015741                                                |
| Up at 24 hrs | A_65_P12755 | 1.57 | 0.049             |               | similar to CDNA FLJ31322 FIS, CLONE LIVER2000033, WEAKLY SIMILAR   |
| Up at 24 hrs | A_65_P05717 | 1.57 | 0.013             | C76793        | UNKNOWN                                                            |
| Up at 24 hrs | A_65_P00538 | 1.57 | 0.039             |               | UNKNOWN                                                            |
| Up at 24 hrs | A_65_P03926 | 1.57 | 0.012             |               | Intronic in U013878                                                |
| Up at 24 hrs | A_65_P08653 | 1.56 | 0.021 NM_009195.1 | Slc12a4       | Mus musculus solute carrier family 12, member 4 (Slc12a4), mRNA    |
| Up at 24 hrs | A_65_P02784 | 1.56 | 0.027 NM_138896.1 | Neurodap1     | UNKNOWN                                                            |
| Up at 24 hrs | A_65_P08110 | 1.56 | 0.006 BC003244.1  |               | NUCLEOLAR PHOSPHOPROTEIN P130 NUCLEOLAR 130 KDA PROTEIN 140 KDA N  |
| Up at 24 hrs | A_65_P01508 | 1.56 | 0.026 BC007487.1  | U2af2         | UNKNOWN                                                            |
| Up at 24 hrs | A_65_P09500 | 1.56 | 0.001             |               | Similar to: Mus musculus 2 days neonate thymus thymic cells cDNA,  |
| Up at 24 hrs | A_65_P00938 | 1.56 | 0.022 NM_032460.1 | Bat4          | Mus musculus HLA-B associated transcript 4 (Bat4), mRNA            |
| Up at 24 hrs | A_65_P02374 | 1.56 | 0.020             | G22p1         | Mus musculus thyroid autoantigen 70 kDa (G22p1), mRNA              |
| Up at 24 hrs | A_65_P04187 | 1.56 | 0.013             |               | UNKNOWN                                                            |
| Up at 24 hrs | A_65_P03554 | 1.56 | 0.026             | D10Erd43e     | UNKNOWN                                                            |
| Up at 24 hrs | A_65_P11185 | 1.56 | 0.031             | D10Erd761e    | UNKNOWN                                                            |
| Up at 24 hrs | A_65_P04953 | 1.56 | 0.047 NM_011809.1 | Ets2          | Mus musculus E26 avian leukemia oncogene 2, 3 domain (Ets2), mRNA  |
| Up at 24 hrs | A_65_P00848 | 1.55 | 0.032             |               | UNKNOWN                                                            |
| Up at 24 hrs | A_65_P01442 | 1.55 | 0.030             |               | Intronic in U038261                                                |
| Up at 24 hrs | A_65_P02883 | 1.55 | 0.011             | D1Erd507e     | UNKNOWN                                                            |
| Up at 24 hrs | A_65_P07525 | 1.55 | 0.002             |               | Intronic in U021346                                                |
| Up at 24 hrs | A_65_P08448 | 1.55 | 0.012 AF235021.1  | Cyp40         | weakly similar to PFTFAIRE-INTERACTING FACTOR 2 [Drosophila melano |
| Up at 24 hrs | A_65_P02001 | 1.55 | 0.042 NM_007690.1 | Chd1          | Mus musculus chromodomain helicase DNA binding protein 1 (Chd1),   |
| Up at 24 hrs | A_65_P01607 | 1.55 | 0.015             | C77491        | UNKNOWN                                                            |
| Up at 24 hrs | A_65_P01202 | 1.55 | 0.045             |               | REPEAT-SEQUENCE                                                    |
| Up at 24 hrs | A_65_P08161 | 1.55 | 0.050 BC005749.1  |               | Intronic in U017664                                                |
| Up at 24 hrs | A_65_P04470 | 1.55 | 0.036 NM_146019.1 | MGC40857      | Mus musculus hypothetical protein MGC40857 (MGC40857), mRNA        |
| Up at 24 hrs | A_65_P02090 | 1.55 | 0.031             | A1848448      | UNKNOWN                                                            |
| Up at 24 hrs | A_65_P07327 | 1.55 | 0.022 BC013558.1  | Gabpb1        | Mus musculus GA repeat binding protein, beta 1 (Gabpb1), mRNA      |
| Up at 24 hrs | A_65_P05956 | 1.54 | 0.028             | C78024        | Intronic in U013906                                                |

|              |             |      |                   |               |                                                                   |
|--------------|-------------|------|-------------------|---------------|-------------------------------------------------------------------|
| Up at 24 hrs | A_65_P06285 | 1.54 | 0.008             |               | Intronic in U004847                                               |
| Up at 24 hrs | A_65_P01941 | 1.54 | 0.019             |               | UNKNOWN                                                           |
| Up at 24 hrs | A_65_P04050 | 1.54 | 0.035 NM_008911.1 | Ppox          | Mus musculus protoporphyrinogen oxidase (Ppox), mRNA              |
| Up at 24 hrs | A_65_P09070 | 1.54 | 0.049 XM_123621.1 | Gdap1         | Mus musculus ganglioside-induced differentiation-associated-prote |
| Up at 24 hrs | A_65_P05093 | 1.54 | 0.035 NM_013648.2 | Rtn2          | Mus musculus reticulon 2 (Z-band associated protein) (Rtn2), mRNA |
| Up at 24 hrs | A_65_P09161 | 1.54 | 0.042             |               | UNKNOWN                                                           |
| Up at 24 hrs | A_65_P02923 | 1.54 | 0.034             | AU022238      | UNKNOWN                                                           |
| Up at 24 hrs | A_65_P02386 | 1.53 | 0.016             |               | Intronic in U016852                                               |
| Up at 24 hrs | A_65_P03916 | 1.53 | 0.020 XM_126221.2 | LOC216860     | SIMILAR TO G PROTEIN PATHWAY SUPPRESSOR 2                         |
| Up at 24 hrs | A_65_P06665 | 1.53 | 0.008 XM_177121.1 |               | Mus musculus similar to LOC90381 [Homo sapiens] (LOC264177), mRNA |
| Up at 24 hrs | A_65_P07988 | 1.53 | 0.039             | C80347        | Intronic in U041336                                               |
| Up at 24 hrs | A_65_P08371 | 1.53 | 0.032             | Agl           | GLYCOGEN DEBRANCHING ENZYME GLYCOGEN DEBRANCHER [INCLUDES: 4 ALPH |
| Up at 24 hrs | A_65_P05401 | 1.53 | 0.030 XM_129589.1 | LOC215015     | UNKNOWN                                                           |
| Up at 24 hrs | A_65_P04476 | 1.53 | 0.028 NM_144553.1 | Hurp-pending  | Mus musculus hepatoma up-regulated protein (Hurp-pending), mRNA   |
| Up at 24 hrs | A_65_P14156 | 1.53 | 0.041             |               | UNKNOWN                                                           |
| Up at 24 hrs | A_65_P00790 | 1.53 | 0.017 AL832578.1  | AI644496      | Mus musculus membrane protein, palmitoylated 5 (MAGUK p55 subfam  |
| Up at 24 hrs | A_65_P01727 | 1.53 | 0.016 XM_149161.2 | LOC228353     | Mus musculus similar to MAP-kinase activating death domain; Rab3  |
| Up at 24 hrs | A_65_P03925 | 1.53 | 0.015             |               | Intronic in U013036                                               |
| Up at 24 hrs | A_65_P04282 | 1.53 | 0.015 NM_134076.1 | 1110035H23Rik | Mus musculus RIKEN cDNA 1110035H23 gene (1110035H23Rik), mRNA     |
| Up at 24 hrs | A_65_P11064 | 1.53 | 0.003             |               | Intronic in U018233                                               |
| Up at 24 hrs | A_65_P05236 | 1.53 | 0.011 BC020488.1  | 5730408I11Rik | REPEAT-SEQUENCE                                                   |
| Up at 24 hrs | A_65_P01643 | 1.52 | 0.029 XM_145698.2 | LOC244059     | CHROMODOMAIN HELICASE DNA BINDING PROTEIN CHD                     |
| Up at 24 hrs | A_65_P01544 | 1.52 | 0.028 XM_131714.1 | Hp1bp3        | HETEROCHROMATIN PROTEIN 2, BINDING PROTEIN 3. [Source:SPTREMBL;Ac |
| Up at 24 hrs | A_65_P07333 | 1.52 | 0.029 NM_025991.1 | 2510026C23Rik | Mus musculus RIKEN cDNA 2510026C23 gene (2510026C23Rik), mRNA     |
| Up at 24 hrs | A_65_P00817 | 1.52 | 0.020             | AI481289      | Mus musculus interleukin 1 receptor-like 2 (Il1rl2), mRNA         |
| Up at 24 hrs | A_65_P02006 | 1.52 | 0.022             |               | Similar to: Mus musculus adult female vagina cDNA, RIKEN full-len |
| Up at 24 hrs | A_65_P00737 | 1.52 | 0.004 AK018693.1  | 9930021A08Rik | Mus musculus adult female vagina cDNA, RIKEN full-length enriched |
| Up at 24 hrs | A_65_P01180 | 1.52 | 0.036             | Fshprh1       | Mus musculus FSH primary response 1 (Fshprh1), mRNA               |
| Up at 24 hrs | A_65_P01519 | 1.52 | 0.047 XM_134420.2 | AI643885      | LARGE NEUTRAL AMINO ACIDS TRANSPORTER SMALL SUBUNIT L TYPE AMINO  |
| Up at 24 hrs | A_65_P04051 | 1.52 | 0.046             |               | UNKNOWN                                                           |
| Up at 24 hrs | A_65_P02950 | 1.52 | 0.039             |               | Similar to: Mus musculus 0 day neonate kidney cDNA, RIKEN full-le |
| Up at 24 hrs | A_65_P03873 | 1.52 | 0.030 XM_130915.2 | 4632407F12Rik | RIKEN cDNA 4632407F12 gene                                        |
| Up at 24 hrs | A_65_P07052 | 1.52 | 0.011 XM_147638.1 | Rock2         | Mus musculus Rho-associated coiled-coil forming kinase 2 (Rock2), |
| Up at 24 hrs | A_65_P11689 | 1.52 | 0.013 AK014710.1  | 4833416J08Rik | Intronic in U008235                                               |
| Up at 24 hrs | A_65_P01103 | 1.52 | 0.029 NM_019696.1 | Cpxm1         | Mus musculus carboxypeptidase X 1 (M14 family) (Cpxm1), mRNA      |
| Up at 24 hrs | A_65_P06419 | 1.52 | 0.004 NM_172823.1 | 5330415H22    | LEISHMANOLYSIN LIKE PEPTIDASE, VARIANT EC 3.4.24.-                |
| Up at 24 hrs | A_65_P05523 | 1.51 | 0.049             | AI849689      | Mus musculus mitogen activated protein kinase 8 (Mapk8), mRNA     |
| Up at 24 hrs | A_65_P02025 | 1.51 | 0.036 NM_021292.1 | Evc           | Mus musculus Ellis van Creveld gene homolog (human) (Evc), mRNA   |
| Up at 24 hrs | A_65_P06865 | 1.51 | 0.017 XM_131697.1 |               | RIKEN CDNA C09                                                    |
| Up at 24 hrs | A_65_P09593 | 1.51 | 0.014 BC018456.1  | Tor1b         | Mus musculus torsk family 1, member B (Tor1b), mRNA               |
| Up at 24 hrs | A_65_P07736 | 1.51 | 0.039             |               | Intronic in U022765                                               |
| Up at 24 hrs | A_65_P11645 | 1.51 | 0.037             |               | UNKNOWN                                                           |
| Up at 24 hrs | A_65_P01801 | 1.51 | 0.015 NM_144927.1 | BC019943      | RNA BINDING                                                       |
| Up at 24 hrs | A_65_P01207 | 1.50 | 0.032 NM_145828.1 | XT-II         | Mus musculus xylosyltransferase 2 (XT-II), mRNA                   |
| Up at 24 hrs | A_65_P03333 | 1.50 | 0.030 XM_132428.1 | 2010310D06    | TRANSMEMBRANE PROTEIN INDUCED BY TUMOR NECROSIS FACTOR            |
| Up at 24 hrs | A_65_P03637 | 1.50 | 0.048             |               | Intronic in U011177                                               |
| Up at 24 hrs | A_65_P04492 | 1.50 | 0.042 XM_147116.2 | Axud1         | Mus musculus AXIN1 up-regulated 1 (Axud1), mRNA                   |
| Up at 24 hrs | A_65_P02948 | 1.50 | 0.013 XM_124695.1 | Gnpi          | Mus musculus glucosamine-6-phosphate deaminase (Gnpi), mRNA       |
| Up at 24 hrs | A_65_P03957 | 1.50 | 0.049 NM_010906.1 | Nfix          | Mus musculus nuclear factor I/X (Nfix), mRNA                      |
| Up at 24 hrs | A_65_P08210 | 1.50 | 0.008 AK003350.1  | 1110003F06Rik | Mus musculus 18 days embryo whole body cDNA, RIKEN full-length en |
| Up at 24 hrs | A_65_P02482 | 1.50 | 0.049             | 2810478G24Rik | UNKNOWN                                                           |
| Up at 24 hrs | A_65_P02486 | 1.50 | 0.044             | DXErt242e     | Intronic in U043807                                               |
| Up at 24 hrs | A_65_P02567 | 1.50 | 0.004 NM_145741.1 | Gdf10         | UNKNOWN                                                           |
| Up at 24 hrs | A_65_P03508 | 1.50 | 0.013             | C77298        | UNKNOWN                                                           |
| Up at 24 hrs | A_65_P03994 | 1.50 | 0.033 NM_019454.1 | DII4          | Mus musculus delta-like 4 (Drosophila) (DII4), mRNA               |
| Up at 24 hrs | A_65_P00989 | 1.50 | 0.006 NM_172943.1 | E130207K11    | Mus musculus hypothetical protein E130207K11 (E130207K11), mRNA   |
| Up at 24 hrs | A_65_P03090 | 1.50 | 0.040 NM_023141.1 | Tor3a         | Mus musculus torsk family 3, member A (Tor3a), mRNA               |
| Up at 24 hrs | A_65_P05627 | 1.50 | 0.008 NM_134022.1 | 6330403K07Rik | Mus musculus RIKEN cDNA 6330403K07 gene (6330403K07Rik), mRNA     |



|              |             |      |                   |               |                                                                   |
|--------------|-------------|------|-------------------|---------------|-------------------------------------------------------------------|
| Up at 24 hrs | A_65_P06027 | 1.50 | 0.035             | C79130        | UNKNOWN                                                           |
| Up at 24 hrs | A_65_P06534 | 1.50 | 0.036             | Lgals8        | Mus musculus lectin, galactose binding, soluble 8 (Lgals8), mRNA  |
| Up at 24 hrs | A_65_P01039 | 1.49 | 0.013             |               | UNKNOWN                                                           |
| Up at 24 hrs | A_65_P04101 | 1.49 | 0.006             | C86807        | Intronic in U033164                                               |
| Up at 24 hrs | A_65_P05729 | 1.49 | 0.049 XM_129099.2 | A1839539      | 60 KDA TAT INTERACTIVE PROTEIN HIV 1 TAT INTERACTIVE              |
| Up at 24 hrs | A_65_P03035 | 1.49 | 0.023             |               | UNKNOWN                                                           |
| Up at 24 hrs | A_65_P04769 | 1.49 | 0.004             | Agtrap        | Mus musculus angiotensin II, type I receptor-associated protein ( |
| Up at 24 hrs | A_65_P07178 | 1.49 | 0.026 BC032287.1  | Daam1         | weakly similar to DJ90A20A.1 (KIAA0381) (FRAGMENT) [Homo sapiens] |
| Up at 24 hrs | A_65_P07379 | 1.49 | 0.036 NM_026167.1 | 1200009K10Rik | Mus musculus RIKEN cDNA 1200009K10 gene (1200009K10Rik), mRNA     |
| Up at 24 hrs | A_65_P09541 | 1.49 | 0.042 XM_127387.2 | 2010111I01Rik | similar to HYPOTHETICAL 61.1 KDA PROTEIN [Homo sapiens]           |
| Up at 24 hrs | A_65_P03611 | 1.49 | 0.039             | 4931405B09Rik | Mus musculus RIKEN cDNA 4931405B09 gene (4931405B09Rik), mRNA     |
| Up at 24 hrs | A_65_P05299 | 1.49 | 0.023             |               | UNKNOWN                                                           |
| Up at 24 hrs | A_65_P01393 | 1.49 | 0.039             |               | Intronic in U031542                                               |
| Up at 24 hrs | A_65_P02556 | 1.49 | 0.025             |               | UNKNOWN                                                           |
| Up at 24 hrs | A_65_P03143 | 1.49 | 0.006             |               | UNKNOWN                                                           |
| Up at 24 hrs | A_65_P07198 | 1.49 | 0.029             |               | UNKNOWN                                                           |
| Up at 24 hrs | A_65_P03718 | 1.49 | 0.002             |               | UNKNOWN                                                           |
| Up at 24 hrs | A_65_P04489 | 1.49 | 0.020             |               | Intronic in U030787                                               |
| Up at 24 hrs | A_65_P06311 | 1.49 | 0.029             | MGC27546      | ARCHAIN 1. [Source:SPTREMBL;Acc:Q91W48]                           |
| Up at 24 hrs | A_65_P09860 | 1.49 | 0.045 NM_024283.1 | 1500015O10Rik | Mus musculus RIKEN cDNA 1500015O10 gene (1500015O10Rik), mRNA     |
| Up at 24 hrs | A_65_P02490 | 1.48 | 0.002 AK004445.1  | D6Erd365e     | Mus musculus 18 days embryo whole body cDNA, RIKEN full-length en |
| Up at 24 hrs | A_65_P04283 | 1.48 | 0.004             | AW554125      | UNKNOWN                                                           |
| Up at 24 hrs | A_65_P06761 | 1.48 | 0.038 XM_126724.2 | LOC207165     | FETAL ALZHEIMER ANTIGEN FETAL ALZ 50 REACTIVE CLONE               |
| Up at 24 hrs | A_65_P09740 | 1.48 | 0.024             | C78393        | Similar to: Mus musculus 16 days embryo head cDNA, RIKEN full-len |
| Up at 24 hrs | A_65_P01638 | 1.48 | 0.039             | C80502        | Intronic in U034093                                               |
| Up at 24 hrs | A_65_P11901 | 1.48 | 0.025             | AU021864      | UNKNOWN                                                           |
| Up at 24 hrs | A_65_P15589 | 1.48 | 0.032             |               | Intronic in U033519                                               |
| Up at 24 hrs | A_65_P00957 | 1.48 | 0.039             |               | UNKNOWN                                                           |
| Up at 24 hrs | A_65_P01640 | 1.48 | 0.015             |               | REPEAT-SEQUENCE                                                   |
| Up at 24 hrs | A_65_P09540 | 1.48 | 0.020 NM_133766.1 | C920006C10Rik | Mus musculus RIKEN cDNA C920006C10 gene (C920006C10Rik), mRNA     |
| Up at 24 hrs | A_65_P03200 | 1.48 | 0.010             |               | Intronic in U042556                                               |
| Up at 24 hrs | A_65_P04113 | 1.48 | 0.041 M63312.1    | Prkacb        | Similar to: Mus musculus protein kinase, cAMP dependent, catalyti |
| Up at 24 hrs | A_65_P20058 | 1.48 | 0.005             |               | UNKNOWN                                                           |
| Up at 24 hrs | A_65_P02404 | 1.48 | 0.031 AY124189.1  | 4933425I22Rik | MESODERM INDUCTION EARLY RESPONSE 1                               |
| Up at 24 hrs | A_65_P02548 | 1.48 | 0.017 XM_130206.1 | 2310011D08Rik | Similar to: Mus musculus RIKEN cDNA 2310011D08 gene (2310011D08Ri |
| Up at 24 hrs | A_65_P05285 | 1.48 | 0.032             |               | UNKNOWN                                                           |
| Up at 24 hrs | A_65_P02854 | 1.47 | 0.049 NM_172134.1 | BC027745      | PYRIDOXINE KINASE EC 2.7.1.35 PYRIDOXAL                           |
| Up at 24 hrs | A_65_P08259 | 1.47 | 0.019 NM_009530.1 | Atrx          | Mus musculus X-linked nuclear protein (Xnp), mRNA                 |
| Up at 24 hrs | A_65_P00966 | 1.47 | 0.025             |               | UNKNOWN                                                           |
| Up at 24 hrs | A_65_P03665 | 1.47 | 0.035 BC006635.1  | Apc7-pending  | UNKNOWN                                                           |
| Up at 24 hrs | A_65_P04425 | 1.47 | 0.011 NM_172277.1 | LOC231834     | SORTING NEXIN                                                     |
| Up at 24 hrs | A_65_P04677 | 1.47 | 0.046 BC023941.1  | Gfer          | Mus musculus growth factor, erv1 (S. cerevisiae)-like (augmenter  |
| Up at 24 hrs | A_65_P05372 | 1.47 | 0.001 NM_013905.1 | Heyl          | Mus musculus hairy/enhancer-of-split related with YRPW motif-like |
| Up at 24 hrs | A_65_P11609 | 1.47 | 0.035 NM_152788.1 | C030032C09Rik | ADULT MALE HIPPOCAMPUS CDNA, RIKEN FULL-LENGTH ENRICHED LIBRARY,  |
| Up at 24 hrs | A_65_P00536 | 1.47 | 0.004             |               | Intronic in U038364                                               |
| Up at 24 hrs | A_65_P01715 | 1.47 | 0.015             |               | UNKNOWN                                                           |
| Up at 24 hrs | A_65_P05938 | 1.47 | 0.033             |               | UNKNOWN                                                           |
| Up at 24 hrs | A_65_P12500 | 1.47 | 0.015             |               | Similar to: Mus musculus 0 day neonate thymus cDNA, RIKEN full-le |
| Up at 24 hrs | A_65_P00836 | 1.47 | 0.035 BC038375.1  | Slc17a6       | Mus musculus solute carrier family 17 (vesicular glutamate transp |
| Up at 24 hrs | A_65_P02329 | 1.47 | 0.045             |               | UNKNOWN                                                           |
| Up at 24 hrs | A_65_P08835 | 1.47 | 0.043             |               | UNKNOWN                                                           |
| Up at 24 hrs | A_65_P07523 | 1.47 | 0.047             |               | UNKNOWN                                                           |
| Up at 24 hrs | A_65_P09668 | 1.47 | 0.022             |               | UNKNOWN                                                           |
| Up at 24 hrs | A_65_P03231 | 1.47 | 0.018 U03873.1    | Prrx1         | Mus musculus paired related homeobox 1 (Prrx1), mRNA              |
| Up at 24 hrs | A_65_P07891 | 1.47 | 0.033 XM_040211.6 | Kif21a        | Mus musculus kinesin family member 21A (Kif21a), mRNA             |
| Up at 24 hrs | A_65_P09808 | 1.47 | 0.012 NM_030749.1 | Sil1-pending  | Mus musculus endoplasmic reticulum chaperone SIL1 homolog (S. cer |
| Up at 24 hrs | A_65_P03172 | 1.46 | 0.026 BC037620.1  | Hsd17b12      | Mus musculus hydroxysteroid (17-beta) dehydrogenase 12 (Hsd17b12) |
| Up at 24 hrs | A_65_P05017 | 1.46 | 0.045             |               | UNKNOWN                                                           |

|              |             |      |                   |               |                                                                   |
|--------------|-------------|------|-------------------|---------------|-------------------------------------------------------------------|
| Up at 24 hrs | A_65_P02999 | 1.46 | 0.018 XM_134012.2 | 6430549H08    | hypothetical Dbl domain (dbl/cdc24 rhoGEF family) containing prot |
| Up at 24 hrs | A_65_P05806 | 1.46 | 0.025             | Strn          | Mus musculus striatal, calmodulin binding protein (Strn), mRNA    |
| Up at 24 hrs | A_65_P01705 | 1.46 | 0.014             |               | REPEAT-SEQUENCE                                                   |
| Up at 24 hrs | A_65_P02566 | 1.46 | 0.006 XM_128198.1 | 5033402L14Rik | Mus musculus expressed sequence AI316867 (AI316867), mRNA         |
| Up at 24 hrs | A_65_P03026 | 1.46 | 0.034             |               | UNKNOWN                                                           |
| Up at 24 hrs | A_65_P16448 | 1.46 | 0.045             | C80113        | REPEAT-SEQUENCE                                                   |
| Up at 24 hrs | A_65_P01350 | 1.46 | 0.036 AE014180.1  | C85363        | Mus musculus piebald deletion region section 8 of 11 of the compl |
| Up at 24 hrs | A_65_P05046 | 1.46 | 0.005             |               | Intronic in U012442                                               |
| Up at 24 hrs | A_65_P01894 | 1.46 | 0.007             |               | Intronic in U005952                                               |
| Up at 24 hrs | A_65_P12602 | 1.46 | 0.039 XM_133260.2 | Rabac1        | PRENYLATED RAB ACCEPTOR 1 (2310040I06RIK PROTEIN). [Source:SPTREM |
| Up at 24 hrs | A_65_P08681 | 1.46 | 0.024 NM_011467.1 | Spr           | UNKNOWN                                                           |
| Up at 24 hrs | A_65_P08368 | 1.46 | 0.025             |               | Intronic in U008133                                               |
| Up at 24 hrs | A_65_P08670 | 1.46 | 0.009             |               | UNKNOWN                                                           |
| Up at 24 hrs | A_65_P01700 | 1.46 | 0.019 NM_033476.1 | Tcfcp2        | Mus musculus transcription factor CP2 (Tcfcp2), mRNA              |
| Up at 24 hrs | A_65_P06986 | 1.46 | 0.016 NM_026896.1 | 1500015J03Rik | Mus musculus RIKEN cDNA 1500015J03 gene (1500015J03Rik), mRNA     |
| Up at 24 hrs | A_65_P07071 | 1.46 | 0.005             |               | UNKNOWN                                                           |
| Up at 24 hrs | A_65_P03755 | 1.45 | 0.001 NM_008321.1 | ldb3          | Mus musculus inhibitor of DNA binding 3 (ldb3), mRNA              |
| Up at 24 hrs | A_65_P01174 | 1.45 | 0.047             |               | UNKNOWN                                                           |
| Up at 24 hrs | A_65_P01100 | 1.45 | 0.004 NM_027115.1 | 2310009E07Rik | UNKNOWN                                                           |
| Up at 24 hrs | A_65_P01306 | 1.45 | 0.049             |               | UNKNOWN                                                           |
| Up at 24 hrs | A_65_P04395 | 1.45 | 0.012 NM_008452.1 | Klf2          | Mus musculus Kruppel-like factor 2 (lung) (Klf2), mRNA            |
| Up at 24 hrs | A_65_P01633 | 1.45 | 0.048 BC028636.1  | Cd3e          | CD3 antigen, epsilon polypeptide                                  |
| Up at 24 hrs | A_65_P03923 | 1.45 | 0.019             |               | UNKNOWN                                                           |
| Up at 24 hrs | A_65_P00916 | 1.45 | 0.046             |               | SODIUM INDEPENDENT ORGANIC ANION TRANSPORTER                      |
| Up at 24 hrs | A_65_P01097 | 1.45 | 0.005 BC010800.1  | Stub1         | UNKNOWN                                                           |
| Up at 24 hrs | A_65_P12036 | 1.45 | 0.032             |               | Intronic in U029804                                               |
| Up at 24 hrs | A_65_P04043 | 1.45 | 0.043 BC006884.1  | 5430416A05Rik | Intronic in U014736                                               |
| Up at 24 hrs | A_65_P02033 | 1.45 | 0.044 BC021759.1  | Sp2           | Mus musculus Sp2 transcription factor (Sp2), mRNA                 |
| Up at 24 hrs | A_65_P02501 | 1.45 | 0.048 NM_148925.1 | Fycp1         | Mus musculus maternal embryonic message 2 (Mem2), mRNA            |
| Up at 24 hrs | A_65_P03759 | 1.45 | 0.021 BC038258.1  | 1110004O12Rik | hypothetical Yeast DNA-binding domain/Ankyrin repeat region circ  |
| Up at 24 hrs | A_65_P10232 | 1.45 | 0.006             |               | UNKNOWN                                                           |
| Up at 24 hrs | A_65_P03233 | 1.45 | 0.009 NM_007753.1 | Cpa3          | Mus musculus carboxypeptidase A3, mast cell (Cpa3), mRNA          |
| Up at 24 hrs | A_65_P06537 | 1.44 | 0.025             |               | UNKNOWN                                                           |
| Up at 24 hrs | A_65_P06576 | 1.44 | 0.012             |               | Intronic in U043098                                               |
| Up at 24 hrs | A_65_P07001 | 1.44 | 0.035             | C86562        | UNKNOWN                                                           |
| Up at 24 hrs | A_65_P08061 | 1.44 | 0.032 NM_172778.1 | 6330414K01    | AMINE OXIDASE [FLAVIN CONTAINING] EC 1.4.3.4 MONOAMINE OXIDASE MA |
| Up at 24 hrs | A_65_P00591 | 1.44 | 0.028 AY028080.1  | Pcm1          | UNKNOWN                                                           |
| Up at 24 hrs | A_65_P02956 | 1.44 | 0.010 NM_021388.1 | Extl2         | Mus musculus extoses (multiple)-like 2 (Extl2), mRNA              |
| Up at 24 hrs | A_65_P03531 | 1.44 | 0.022             | Tcea1         | Similar to: Mus musculus, clone IMAGE:5324476, mRNA               |
| Up at 24 hrs | A_65_P07457 | 1.44 | 0.040             | Bves          | blood vessel epicardial substance                                 |
| Up at 24 hrs | A_65_P07827 | 1.44 | 0.048             |               | UNKNOWN                                                           |
| Up at 24 hrs | A_65_P05845 | 1.44 | 0.002 BC034725.1  | Dctn4         | Mus musculus dynactin 4 (Dctn4), mRNA                             |
| Up at 24 hrs | A_65_P01125 | 1.44 | 0.037             |               | Intronic in U014129                                               |
| Up at 24 hrs | A_65_P09361 | 1.44 | 0.046 AF169288.1  | Sgcb          | Mus musculus sarcoglycan, beta (43kD dystrophin-associated glycop |
| Up at 24 hrs | A_65_P03050 | 1.44 | 0.014 AK013774.1  | 2900073F20Rik | TEASHIRT 2 (FRAGMENT) homolog [Mus musculus]                      |
| Up at 24 hrs | A_65_P06797 | 1.44 | 0.037 XM_150279.2 |               | Cross Reactive                                                    |
| Up at 24 hrs | A_65_P10795 | 1.44 | 0.005             |               | TESTIS SPECIFIC PROTEIN A (ZINC FINGER PROTEIN TSGA) homolog [Rat |
| Up at 24 hrs | A_65_P02089 | 1.44 | 0.029 NM_022009.1 | Fliih         | Mus musculus flightless I homolog (Drosophila) (Fliih), mRNA      |
| Up at 24 hrs | A_65_P03348 | 1.44 | 0.009 NM_015751.1 | Abce1         | UNKNOWN                                                           |
| Up at 24 hrs | A_65_P19162 | 1.44 | 0.008 AK011661.1  | 2610034E08Rik | Mus musculus zinc finger protein 318 (Zfp318), mRNA               |
| Up at 24 hrs | A_65_P06415 | 1.44 | 0.002 BC017686.1  | Ubin-pending  | Mus musculus ataxin-1 ubiquitin-like interacting protein (Ubin-pe |
| Up at 24 hrs | A_65_P06701 | 1.44 | 0.002             | Ncor1         | UNKNOWN                                                           |
| Up at 24 hrs | A_65_P07618 | 1.44 | 0.045             | 4930472G13Rik | NEUROLYSIN, MITOCHONDRIAL PRECURSOR EC 3.4.24.16 NEUROTENSIN ENDO |
| Up at 24 hrs | A_65_P08222 | 1.44 | 0.007 XM_135174.1 | Clasp2        | CLASP2 homolog [Mus musculus]                                     |
| Up at 24 hrs | A_65_P02155 | 1.44 | 0.020 XM_132197.2 | Rpl5          | 60S RIBOSOMAL PROTEIN L5 (FRAGMENT). [Source:SWISSPROT;Acc:P47962 |
| Up at 24 hrs | A_65_P03924 | 1.44 | 0.016             |               | UNKNOWN                                                           |
| Up at 24 hrs | A_65_P00969 | 1.43 | 0.020 NM_026603.1 | 1500003K04Rik | Mus musculus RIKEN cDNA 1500003K04 gene (1500003K04Rik), mRNA     |
| Up at 24 hrs | A_65_P05175 | 1.43 | 0.046             | Catnal1       | Mus musculus catenin alpha-like 1 (Catnal1), mRNA                 |

|              |             |      |                   |               |                                                                   |
|--------------|-------------|------|-------------------|---------------|-------------------------------------------------------------------|
| Up at 24 hrs | A_65_P03979 | 1.43 | 0.029 NM_010907.1 | Nfkbia        | Mus musculus nuclear factor of kappa light chain gene enhancer in |
| Up at 24 hrs | A_65_P06478 | 1.43 | 0.038 NM_153560.1 | Al426465      | Mus musculus expressed sequence Al426465 (Al426465), mRNA         |
| Up at 24 hrs | A_65_P06906 | 1.43 | 0.016 NM_027890.2 | 1200011D11Rik | Mus musculus RIKEN cDNA 1200011D11 gene (1200011D11Rik), mRNA     |
| Up at 24 hrs | A_65_P03330 | 1.43 | 0.018 NM_028991.1 | Mapk1         | Mus musculus mitogen activated protein kinase 1 (Mapk1), mRNA     |
| Up at 24 hrs | A_65_P07355 | 1.43 | 0.042             |               | Intronic in U018507                                               |
| Up at 24 hrs | A_65_P13795 | 1.43 | 0.044             |               | UNKNOWN                                                           |
| Up at 24 hrs | A_65_P01685 | 1.43 | 0.023             |               | UNKNOWN                                                           |
| Up at 24 hrs | A_65_P03129 | 1.43 | 0.046 XM_131996.1 |               | SODIUM/IODIDE COTRANSPORTER NA + /I COTRANSPORTER SODIUM IODIDE S |
| Up at 24 hrs | A_65_P14314 | 1.43 | 0.017 NM_010286.1 | Giliz         | Mus musculus glucocorticoid-induced leucine zipper (Giliz), mRNA  |
| Up at 24 hrs | A_65_P01476 | 1.43 | 0.019 NM_027162.1 | 2310075G12Rik | Mus musculus RIKEN cDNA 2310075G12 gene (2310075G12Rik), mRNA     |
| Up at 24 hrs | A_65_P02681 | 1.43 | 0.012 XM_178923.1 | D11Bwg0434e   | hypothetical Zinc carboxypeptidases, carboxypeptidase A metallopr |
| Up at 24 hrs | A_65_P03264 | 1.43 | 0.008             |               | UNKNOWN                                                           |
| Up at 24 hrs | A_65_P03708 | 1.43 | 0.024             | D10Ucla1      | CDNA FLJ14374 FIS, CLONE HEMBA1001635, WEAKLY SIMILAR TO TESTIS S |
| Up at 24 hrs | A_65_P07466 | 1.43 | 0.003 XM_164545.1 |               | UNKNOWN                                                           |
| Up at 24 hrs | A_65_P00740 | 1.43 | 0.039 BC030442.1  | LOC209798     | ADAMTS EC 3.4.24.- A DISINTEGRIN AND METALLOPROTEINASE WITH THROM |
| Up at 24 hrs | A_65_P01115 | 1.43 | 0.009             |               | UNKNOWN                                                           |
| Up at 24 hrs | A_65_P04560 | 1.43 | 0.035             |               | UNKNOWN                                                           |
| Up at 24 hrs | A_65_P18535 | 1.43 | 0.049             | C87129        | Intronic in U022662                                               |
| Up at 24 hrs | A_65_P04191 | 1.43 | 0.043 BC031813.1  |               | UNKNOWN                                                           |
| Up at 24 hrs | A_65_P02971 | 1.42 | 0.005             |               | Intronic in U022268                                               |
| Up at 24 hrs | A_65_P06121 | 1.42 | 0.020 XM_122760.1 | Jub           | Mus musculus ajuba (Jub), mRNA                                    |
| Up at 24 hrs | A_65_P07357 | 1.42 | 0.031 XM_128246.1 | Al451006      | similar to HYPOTHETICAL 80.1 KDA PROTEIN (FRAGMENT) [Homo sapiens |
| Up at 24 hrs | A_65_P02123 | 1.42 | 0.041 NM_010274.1 | Gdm1          | Mus musculus glycerol phosphate dehydrogenase 1, mitochondrial (G |
| Up at 24 hrs | A_65_P05020 | 1.42 | 0.041             |               | UNKNOWN                                                           |
| Up at 24 hrs | A_65_P11662 | 1.42 | 0.031             |               | Intronic in U031895                                               |
| Up at 24 hrs | A_65_P16928 | 1.42 | 0.026             | Sema6a        | Mus musculus sema domain, transmembrane domain (TM), and cytoplas |
| Up at 24 hrs | A_65_P12307 | 1.42 | 0.007             |               | UNKNOWN                                                           |
| Up at 24 hrs | A_65_P03613 | 1.42 | 0.029             |               | Intronic in U010943                                               |
| Up at 24 hrs | A_65_P00601 | 1.42 | 0.002 NM_009284.1 | Stat6         | Mus musculus signal transducer and activator of transcription 6 ( |
| Up at 24 hrs | A_65_P04180 | 1.42 | 0.029 BC005686.1  | Elk3          | Mus musculus ELK3, member of ETS oncogene family (Elk3), mRNA     |
| Up at 24 hrs | A_65_P05864 | 1.42 | 0.035             | C85395        | UNKNOWN                                                           |
| Up at 24 hrs | A_65_P07382 | 1.42 | 0.037 L19609.1    | Apc           | Mus musculus adenomatous polyposis coli-like protein transcript 1 |
| Up at 24 hrs | A_65_P05769 | 1.42 | 0.026             | D7Erd685e     | UNKNOWN                                                           |
| Up at 24 hrs | A_65_P07476 | 1.42 | 0.037             | 1700029H06Rik | Mus musculus RIKEN cDNA 1700029H06 gene (1700029H06Rik), mRNA     |
| Up at 24 hrs | A_65_P10699 | 1.41 | 0.007 NM_139153.1 | Centg3        | Mus musculus centaurin, gamma 3 (Centg3), mRNA                    |
| Up at 24 hrs | A_65_P04005 | 1.41 | 0.029             |               | Intronic in U018654                                               |
| Up at 24 hrs | A_65_P04554 | 1.41 | 0.046 XM_133326.2 | 2610014H22Rik | ZINC FINGER PROTEIN HRX ALL 1                                     |
| Up at 24 hrs | A_65_P10190 | 1.41 | 0.028             |               | REPEAT-SEQUENCE                                                   |
| Up at 24 hrs | A_65_P00850 | 1.41 | 0.021 XM_128348.1 | 1190006E07Rik | hypothetical Eukaryotic protein of unknown function, DUF279 conta |
| Up at 24 hrs | A_65_P00661 | 1.41 | 0.004 NM_028301.1 | 2700067D09Rik | Mus musculus RIKEN cDNA 2700067D09 gene (2700067D09Rik), mRNA     |
| Up at 24 hrs | A_65_P07426 | 1.41 | 0.016 XM_148595.1 | E030019O05    | Mus musculus hypothetical protein MGC36956 (MGC36956), mRNA       |
| Up at 24 hrs | A_65_P01029 | 1.41 | 0.032 NM_145439.1 | LOC217353     | Mus musculus similar to expressed in activated T/LAK lymphocytes  |
| Up at 24 hrs | A_65_P03921 | 1.41 | 0.007             |               | Intronic in U004123                                               |
| Up at 24 hrs | A_65_P04985 | 1.41 | 0.027 XM_148301.1 |               | UNKNOWN                                                           |
| Up at 24 hrs | A_65_P01037 | 1.41 | 0.031             |               | Intronic in U002218                                               |
| Up at 24 hrs | A_65_P06139 | 1.41 | 0.032 BC024962.1  | Timp2         | Mus musculus tissue inhibitor of metalloproteinase 2 (Timp2), mRN |
| Up at 24 hrs | A_65_P06762 | 1.41 | 0.015 XM_132772.1 | MGC6835       | Mus musculus similar to decidual protein induced by progesterone  |
| Up at 24 hrs | A_65_P04797 | 1.41 | 0.011             | C6.1A-pending | Mus musculus RIKEN cDNA 4933434E20 gene (4933434E20Rik), mRNA     |
| Up at 24 hrs | A_65_P06697 | 1.41 | 0.027 NM_139154.1 | Rab40c        | Mus musculus Rab40c, member RAS oncogene family (Rab40c), mRNA    |
| Up at 24 hrs | A_65_P08978 | 1.41 | 0.015             |               | UNKNOWN                                                           |
| Up at 24 hrs | A_65_P00745 | 1.40 | 0.014             |               | UNKNOWN                                                           |
| Up at 24 hrs | A_65_P02167 | 1.40 | 0.027 AF303429.1  | GPT           | ALANINE AMINOTRANSFERASE EC 2.6.1.2 GLUTAMIC PYRUVIC TRANSAMINASE |
| Up at 24 hrs | A_65_P06029 | 1.40 | 0.038             |               | NPD019 homolog [Homo sapiens]                                     |
| Up at 24 hrs | A_65_P07993 | 1.40 | 0.046 XM_129100.2 | 2810441F20Rik | SPLICING FACTOR 3B SUBUNIT 2 SPLICEOSOME ASSOCIATED PROTEIN 145 S |
| Up at 24 hrs | A_65_P01227 | 1.40 | 0.013 NM_145362.1 | LOC208211     | Mus musculus hypothetical protein BC011281 (LOC208211), mRNA      |
| Up at 24 hrs | A_65_P09441 | 1.40 | 0.024 M81342.1    | Fgfr3         | Similar to: BALB/c fibroblast growth factor receptor 3 (mFR3) mRN |
| Up at 24 hrs | A_65_P01020 | 1.40 | 0.002 XM_130094.2 | AL024097      | Mus musculus similar to cerebral cell adhesion molecule [Homo sap |
| Up at 24 hrs | A_65_P06657 | 1.40 | 0.040 XM_134058.1 | 2210415M20Rik | CGI-145 PROTEIN homolog [Homo sapiens]                            |

|              |             |      |       |             |                |                                                                      |
|--------------|-------------|------|-------|-------------|----------------|----------------------------------------------------------------------|
| Up at 24 hrs | A_65_P01837 | 1.40 | 0.024 | NM_024215.1 | 3110024A21Rik  | Mus musculus RIKEN cDNA 3110024A21 gene (3110024A21Rik), mRNA        |
| Up at 24 hrs | A_65_P04917 | 1.40 | 0.029 |             |                | Intronic in U043542                                                  |
| Up at 24 hrs | A_65_P03162 | 1.40 | 0.012 | AF220142.1  | Trim34         | Mus musculus tripartite motif protein 34 (Trim34), mRNA              |
| Up at 24 hrs | A_65_P06529 | 1.40 | 0.017 | BC036995.1  | N4wbp4-pending | Mus musculus Nedd4 WW binding protein 4 (N4wbp4-pending), mRNA       |
| Up at 24 hrs | A_65_P04019 | 1.40 | 0.009 |             | AU016128       | UNKNOWN                                                              |
| Up at 24 hrs | A_65_P07108 | 1.40 | 0.011 |             |                | REPEAT-SEQUENCE                                                      |
| Up at 24 hrs | A_65_P07443 | 1.40 | 0.021 |             | 8430408J09Rik  | UNKNOWN                                                              |
| Up at 24 hrs | A_65_P00590 | 1.40 | 0.007 | NM_145607.1 | BC017545       | Mus musculus cDNA sequence BC017545 (BC017545), mRNA                 |
| Up at 24 hrs | A_65_P06581 | 1.40 | 0.035 |             | D3Wsu79e       | Intronic in U024165                                                  |
| Up at 24 hrs | A_65_P05376 | 1.40 | 0.050 |             |                | Intronic in U043238                                                  |
| Up at 24 hrs | A_65_P06880 | 1.40 | 0.005 | NM_026840.1 | Pdgfrl         | Mus musculus platelet-derived growth factor receptor-like (Pdgfrl)   |
| Up at 24 hrs | A_65_P08760 | 1.40 | 0.009 | NM_021523.1 | Ureb1-pending  | Mus musculus upstream regulatory element binding protein 1 (Ureb1)   |
| Up at 24 hrs | A_65_P02765 | 1.40 | 0.017 | XM_129835.1 | BC010584       | Similar to: Mus musculus hypothetical gene supported by BC010584     |
| Up at 24 hrs | A_65_P02873 | 1.39 | 0.039 |             |                | LARGE NEUTRAL AMINO ACIDS TRANSPORTER SMALL SUBUNIT L TYPE AMINO     |
| Up at 24 hrs | A_65_P04862 | 1.39 | 0.024 |             |                | UNKNOWN                                                              |
| Up at 24 hrs | A_65_P05362 | 1.39 | 0.025 | NM_134078.2 | 6330407G04Rik  | Mus musculus RIKEN cDNA 6330407G04 gene (6330407G04Rik), mRNA        |
| Up at 24 hrs | A_65_P11329 | 1.39 | 0.046 |             |                | Intronic in U027692                                                  |
| Up at 24 hrs | A_65_P12916 | 1.39 | 0.004 |             | D3Etd34e       | Intronic in U003484                                                  |
| Up at 24 hrs | A_65_P02952 | 1.39 | 0.016 | BC013066.1  | Dok1           | Mus musculus downstream of tyrosine kinase 1 (Dok1), mRNA            |
| Up at 24 hrs | A_65_P03130 | 1.39 | 0.019 |             |                | UNKNOWN                                                              |
| Up at 24 hrs | A_65_P03564 | 1.39 | 0.013 | NM_008641.1 | Mtssk          | Mus musculus microtubule associated testis specific serine/threonine |
| Up at 24 hrs | A_65_P05935 | 1.39 | 0.039 | BC003308.1  | 1810073N04Rik  | SIMILAR TO RIKEN CDNA N04                                            |
| Up at 24 hrs | A_65_P01937 | 1.39 | 0.024 | NM_172771.1 | 6330586A12     | weakly similar to X-LIKE 1 PROTEIN [Homo sapiens]                    |
| Up at 24 hrs | A_65_P05800 | 1.39 | 0.044 | NM_010440.1 | Hmg20b         | Mus musculus high mobility group 20 B (Hmg20b), mRNA                 |
| Up at 24 hrs | A_65_P01130 | 1.39 | 0.046 | NM_024229.1 | 1110033E03Rik  | Mus musculus RIKEN cDNA 1110033E03 gene (1110033E03Rik), mRNA        |
| Up at 24 hrs | A_65_P05007 | 1.39 | 0.030 | NM_028152.1 | Mms19l         | Mus musculus MMS19 (MET18 S. cerevisiae)-like (Mms19l), mRNA         |
| Up at 24 hrs | A_65_P08499 | 1.39 | 0.039 | XM_128960.1 | 4432404P07Rik  | Intronic in U038309                                                  |
| Up at 24 hrs | A_65_P06291 | 1.39 | 0.047 |             |                | UNKNOWN                                                              |
| Up at 24 hrs | A_65_P07433 | 1.39 | 0.015 |             | Elf1           | Mus musculus E74-like factor 1 (Elf1), mRNA                          |
| Up at 24 hrs | A_65_P03041 | 1.39 | 0.006 |             |                | UNKNOWN                                                              |
| Up at 24 hrs | A_65_P03403 | 1.39 | 0.031 | NM_145430.1 | LOC216971      | Mus musculus similar to hypothetical protein FLJ10700 (LOC216971)    |
| Up at 24 hrs | A_65_P03731 | 1.39 | 0.026 | NM_145599.1 | BC004056       | Mus musculus cDNA sequence BC004056 (BC004056), mRNA                 |
| Up at 24 hrs | A_65_P01287 | 1.38 | 0.004 |             |                | Intronic in U042016                                                  |
| Up at 24 hrs | A_65_P01387 | 1.38 | 0.021 | NM_009828.1 | Ccna2          | UNKNOWN                                                              |
| Up at 24 hrs | A_65_P05934 | 1.38 | 0.048 | NM_009468.1 | Dpysl3         | Mus musculus dihydropyrimidinase-like 3 (Dpysl3), mRNA               |
| Up at 24 hrs | A_65_P06219 | 1.38 | 0.023 |             |                | Intronic in U025194                                                  |
| Up at 24 hrs | A_65_P02534 | 1.38 | 0.047 | Z48449.1    | 2610301B20Rik  | Mus musculus RIKEN cDNA 2610301B20 gene (2610301B20Rik), mRNA        |
| Up at 24 hrs | A_65_P11060 | 1.38 | 0.038 |             |                | UNKNOWN                                                              |
| Up at 24 hrs | A_65_P02103 | 1.38 | 0.020 | NM_145220.1 | LOC216190      | Mus musculus DIP13 beta (LOC216190), mRNA                            |
| Up at 24 hrs | A_65_P15602 | 1.38 | 0.021 | NM_023320.1 | 2810052M02Rik  | Mus musculus RIKEN cDNA 2810052M02 gene (2810052M02Rik), mRNA        |
| Up at 24 hrs | A_65_P03412 | 1.38 | 0.022 |             |                | Intronic in U033751                                                  |
| Up at 24 hrs | A_65_P13033 | 1.38 | 0.034 | XM_157900.1 | 6330414G02Rik  | weakly similar to BCL2/ADENOVIRUS E1B 19-KDA PROTEIN-INTERACTING     |
| Up at 24 hrs | A_65_P01711 | 1.38 | 0.008 | NM_016884.1 | Hnrpc          | Mus musculus heterogeneous nuclear ribonucleoprotein C (Hnrpc), m    |
| Up at 24 hrs | A_65_P01812 | 1.38 | 0.017 | XM_161832.1 |                | UNKNOWN                                                              |
| Up at 24 hrs | A_65_P12571 | 1.38 | 0.013 | XM_150068.2 | A530071H08     | VINEXIN SH3 CONTAINING MOLECULE 1 SCAM                               |
| Up at 24 hrs | A_65_P01657 | 1.38 | 0.045 | NM_028419.1 | 2900070E19Rik  | Mus musculus RIKEN cDNA 2900070E19 gene (2900070E19Rik), mRNA        |
| Up at 24 hrs | A_65_P02767 | 1.37 | 0.027 | XM_133763.2 | C76308         | UNKNOWN                                                              |
| Up at 24 hrs | A_65_P00570 | 1.37 | 0.033 | NM_013529.1 | Gfpt2          | Mus musculus glutamine fructose-6-phosphate transaminase 2 (Gfpt2)   |
| Up at 24 hrs | A_65_P00599 | 1.37 | 0.024 | BC021524.1  |                | Intronic in U009793                                                  |
| Up at 24 hrs | A_65_P09662 | 1.37 | 0.032 |             |                | Intronic in U018465                                                  |
| Up at 24 hrs | A_65_P11168 | 1.37 | 0.030 | NM_145576.1 | Znf212         | Mus musculus Zinc finger protein 212 (Znf212), mRNA                  |
| Up at 24 hrs | A_65_P12497 | 1.37 | 0.035 |             | AI256853       | UNKNOWN                                                              |
| Up at 24 hrs | A_65_P18921 | 1.37 | 0.046 |             |                | STE20 LIKE                                                           |
| Up at 24 hrs | A_65_P08199 | 1.37 | 0.019 |             | Fem1a          | Mus musculus feminization 1 homolog a (C. elegans) (Fem1a), mRNA     |
| Up at 24 hrs | A_65_P03547 | 1.37 | 0.005 | NM_133780.2 | C77892         | Mus musculus expressed sequence C77892 (C77892), mRNA                |
| Up at 24 hrs | A_65_P06472 | 1.37 | 0.039 | AF198092.1  |                | UNKNOWN                                                              |
| Up at 24 hrs | A_65_P00577 | 1.37 | 0.027 |             |                | UNKNOWN                                                              |
| Up at 24 hrs | A_65_P01412 | 1.37 | 0.038 |             |                | UNKNOWN                                                              |

|              |             |      |                   |               |                                                                    |
|--------------|-------------|------|-------------------|---------------|--------------------------------------------------------------------|
| Up at 24 hrs | A_65_P06804 | 1.37 | 0.029 BC010985.1  | Galt          | Mus musculus galactose-1-phosphate uridyl transferase (Galt), mRNA |
| Up at 24 hrs | A_65_P07978 | 1.37 | 0.032 NM_012841.1 | Dcc           | tumor suppressor protein dcc precursor {Mus musculus}              |
| Up at 24 hrs | A_65_P02035 | 1.37 | 0.010 XM_129120.2 | 2010003J03Rik | Mus musculus RIKEN cDNA 2010003J03 gene (2010003J03Rik), mRNA      |
| Up at 24 hrs | A_65_P07180 | 1.37 | 0.046 NM_009933.1 | Col6a1        | Mus musculus procollagen, type VI, alpha 1 (Col6a1), mRNA          |
| Up at 24 hrs | A_65_P11738 | 1.36 | 0.026             |               | UNKNOWN                                                            |
| Up at 24 hrs | A_65_P03182 | 1.36 | 0.014 NM_008495.1 | Lgals1        | Mus musculus lectin, galactose binding, soluble 1 (Lgals1), mRNA   |
| Up at 24 hrs | A_65_P05991 | 1.36 | 0.029 K00691.1    | Ai661180      | UNKNOWN                                                            |
| Up at 24 hrs | A_65_P13064 | 1.36 | 0.036 AE014177.1  | Ednrb         | Mus musculus endothelin receptor type B (Ednrb), mRNA              |
| Up at 24 hrs | A_65_P04306 | 1.36 | 0.003             |               | UNKNOWN                                                            |
| Up at 24 hrs | A_65_P01356 | 1.36 | 0.050             |               | UNKNOWN                                                            |
| Up at 24 hrs | A_65_P05871 | 1.36 | 0.048 XM_124471.1 | AA408817      | UNKNOWN                                                            |
| Up at 24 hrs | A_65_P06519 | 1.36 | 0.034 XM_126369.1 | 4930511N19Rik | SIMILAR TO ZINC FINGER PROTEIN 135 (CLONE PHZ-17). [Source:SPTRM   |
| Up at 24 hrs | A_65_P06866 | 1.36 | 0.026             |               | UNKNOWN                                                            |
| Up at 24 hrs | A_65_P07644 | 1.36 | 0.023             | C79329        | UNKNOWN                                                            |
| Up at 24 hrs | A_65_P00888 | 1.36 | 0.016             |               | UNKNOWN                                                            |
| Up at 24 hrs | A_65_P04788 | 1.36 | 0.027             | Rad23b        | UNKNOWN                                                            |
| Up at 24 hrs | A_65_P03247 | 1.36 | 0.028             |               | UNKNOWN                                                            |
| Up at 24 hrs | A_65_P10700 | 1.36 | 0.010             |               | UNKNOWN                                                            |
| Up at 24 hrs | A_65_P02654 | 1.36 | 0.000             |               | UNKNOWN                                                            |
| Up at 24 hrs | A_65_P12336 | 1.36 | 0.012             |               | Similar to: Mus musculus 16 days neonate heart cDNA, RIKEN full-I  |
| Up at 24 hrs | A_65_P02543 | 1.35 | 0.039 XM_132143.1 | 5730576P14Rik | RIKEN cDNA 5730576P14 gene                                         |
| Up at 24 hrs | A_65_P03190 | 1.35 | 0.018             |               | Intronic in U034470                                                |
| Up at 24 hrs | A_65_P00622 | 1.35 | 0.050 BC017530.1  | Bysl          | Mus musculus bystin-like (Bysl), mRNA                              |
| Up at 24 hrs | A_65_P05812 | 1.35 | 0.022             |               | UNKNOWN                                                            |
| Up at 24 hrs | A_65_P00939 | 1.35 | 0.037             |               | Intronic in U042853                                                |
| Up at 24 hrs | A_65_P05181 | 1.35 | 0.025 NM_013757.1 | Sytl4         | Mus musculus synaptotagmin-like 4 (Sytl4), mRNA                    |
| Up at 24 hrs | A_65_P10697 | 1.35 | 0.008             | C80161        | Intronic in U034527                                                |
| Up at 24 hrs | A_65_P10893 | 1.35 | 0.023 XM_130082.1 | C87750        | Mus musculus LOC227616 (LOC227616), mRNA                           |
| Up at 24 hrs | A_65_P00634 | 1.35 | 0.005 BC032257.1  | Tnfaip3       | Mus musculus tumor necrosis factor, alpha-induced protein 3 (Tnfa  |
| Up at 24 hrs | A_65_P01860 | 1.35 | 0.034 BC006792.1  |               | OLD ASTROCYTE SPECIFICALLY INDUCED                                 |
| Up at 24 hrs | A_65_P04102 | 1.35 | 0.050             |               | Intronic in U008673                                                |
| Up at 24 hrs | A_65_P06540 | 1.35 | 0.039 XM_128841.2 | 2310003A05Rik | RIKEN cDNA 2310003A05 gene / HSPC305 {Homo sapiens}                |
| Up at 24 hrs | A_65_P01232 | 1.35 | 0.018 NM_013848.1 | Ermmap        | Mus musculus erythroblast membrane-associated protein (Ermmap), mR |
| Up at 24 hrs | A_65_P01986 | 1.35 | 0.039             |               | Intronic in U036169                                                |
| Up at 24 hrs | A_65_P08944 | 1.35 | 0.003 XM_127781.2 | 5430409I18Rik | FACTOR                                                             |
| Up at 24 hrs | A_65_P00729 | 1.35 | 0.005 NM_023348.1 | 1300018G05Rik | Mus musculus RIKEN cDNA 1300018G05 gene (1300018G05Rik), mRNA      |
| Up at 24 hrs | A_65_P02408 | 1.35 | 0.005             |               | UNKNOWN                                                            |
| Up at 24 hrs | A_65_P03463 | 1.35 | 0.028             | AV239853      | Mus musculus interleukin 1 receptor accessory protein (Il1rap), m  |
| Up at 24 hrs | A_65_P04009 | 1.35 | 0.000 NM_008298.1 | Dnaja1        | Mus musculus DnaJ (Hsp40) homolog, subfamily A, member 1 (Dnaja1)  |
| Up at 24 hrs | A_65_P03858 | 1.35 | 0.013             |               | Intronic in U039588                                                |
| Up at 24 hrs | A_65_P04480 | 1.35 | 0.038 NM_019537.1 | Dscr2         | Mus musculus Down syndrome critical region homolog 2 (human) (Dsc  |
| Up at 24 hrs | A_65_P04863 | 1.34 | 0.013 BC018394.1  | Csk           | Mus musculus c-src tyrosine kinase (Csk), mRNA                     |
| Up at 24 hrs | A_65_P05059 | 1.34 | 0.033 NM_029787.1 | Dia1          | Mus musculus diaphorase 1 (NADH) (Dia1), mRNA                      |
| Up at 24 hrs | A_65_P05561 | 1.34 | 0.015 XM_149759.2 | LOC232314     | Similar to: Mus musculus LOC232314 (LOC232314), mRNA               |
| Up at 24 hrs | A_65_P02760 | 1.34 | 0.020             |               | Intronic in U031230                                                |
| Up at 24 hrs | A_65_P06227 | 1.34 | 0.011 AK019137.1  | 2500002B13Rik | Mus musculus 13 days embryo liver cDNA, RIKEN full-length enriche  |
| Up at 24 hrs | A_65_P06668 | 1.34 | 0.047 NM_148926.1 | Tex27         | Mus musculus testis expressed gene 27 (Tex27), mRNA                |
| Up at 24 hrs | A_65_P01826 | 1.34 | 0.036 AL049381.1  | 2310056B04Rik | UNKNOWN                                                            |
| Up at 24 hrs | A_65_P03805 | 1.34 | 0.045 NM_020506.1 | Xpo4-pending  | Mus musculus exportin 4 (Xpo4-pending), mRNA                       |
| Up at 24 hrs | A_65_P02865 | 1.34 | 0.020 XM_131784.2 | 2810441C07Rik | hypothetical DBL homology domain structure containing protein      |
| Up at 24 hrs | A_65_P10967 | 1.34 | 0.041             |               | Intronic in U006228                                                |
| Up at 24 hrs | A_65_P07362 | 1.34 | 0.019 NM_008668.1 | Nab2          | Mus musculus Ngfi-A binding protein 2 (Nab2), mRNA                 |
| Up at 24 hrs | A_65_P01542 | 1.34 | 0.038             |               | UNKNOWN                                                            |
| Up at 24 hrs | A_65_P06421 | 1.34 | 0.020             |               | Intronic in U025194                                                |
| Up at 24 hrs | A_65_P06619 | 1.34 | 0.018 BC008272.1  | Nsg1          | Mus musculus neuron specific gene family member 1 (Nsg1), mRNA     |
| Up at 24 hrs | A_65_P07135 | 1.34 | 0.041 XM_136572.1 |               | Mus musculus similar to hypothetical protein [Homo sapiens] [LOC2  |
| Up at 24 hrs | A_65_P09289 | 1.34 | 0.044             | Dmtf1         | Intronic in U005244                                                |
| Up at 24 hrs | A_65_P06043 | 1.34 | 0.029             |               | F-BOX DOMAIN PROTEIN homolog [Homo sapiens]                        |

|              |             |      |                   |                |                                                                    |
|--------------|-------------|------|-------------------|----------------|--------------------------------------------------------------------|
| Up at 24 hrs | A_65_P14071 | 1.34 | 0.029 NM_133229.1 | Dscr6          | Mus musculus mouse homolog of human Down syndrome critical region  |
| Up at 24 hrs | A_65_P00675 | 1.33 | 0.013             | 5730504C04Rik  | UNKNOWN                                                            |
| Up at 24 hrs | A_65_P01219 | 1.33 | 0.045 NM_134102.1 | Pla1a          | Mus musculus phosphatidylserine-specific phospholipase A1 (Pspla1) |
| Up at 24 hrs | A_65_P02275 | 1.33 | 0.046 XM_161133.1 |                | Mus musculus LOC207280 (LOC207280), mRNA                           |
| Up at 24 hrs | A_65_P07285 | 1.33 | 0.033 XM_134195.1 | Homer3-pending | EUKARYOTIC INITIATION FACTOR 4A                                    |
| Up at 24 hrs | A_65_P08888 | 1.33 | 0.006 XM_130288.1 | Slc4a10        | Mus musculus solute carrier family 4, sodium bicarbonate cotransp  |
| Up at 24 hrs | A_65_P09318 | 1.33 | 0.004 AK018164.1  | 6330412C24Rik  | Mus musculus adult male medulla oblongata cDNA, RIKEN full-length  |
| Up at 24 hrs | A_65_P01516 | 1.33 | 0.035 NM_018878.1 | Paxip1         | Mus musculus PAX interacting (with transcription-activation domai  |
| Up at 24 hrs | A_65_P15596 | 1.33 | 0.036 AL833526.1  |                | UNKNOWN                                                            |
| Up at 24 hrs | A_65_P03232 | 1.33 | 0.018 AL133101.1  |                | UNKNOWN                                                            |
| Up at 24 hrs | A_65_P05842 | 1.33 | 0.030 BC019646.1  |                | UNKNOWN                                                            |
| Up at 24 hrs | A_65_P07237 | 1.33 | 0.048             |                | UNKNOWN                                                            |
| Up at 24 hrs | A_65_P08071 | 1.33 | 0.003 NM_011799.1 | Cdc6           | Mus musculus cell division cycle 6 homolog (S. cerevisiae) (Cdc6)  |
| Up at 24 hrs | A_65_P01169 | 1.33 | 0.028 NM_025504.1 | 2310004L02Rik  | Mus musculus RIKEN cDNA 2310004L02 gene (2310004L02Rik), mRNA      |
| Up at 24 hrs | A_65_P04423 | 1.33 | 0.004 NM_134002.1 | AI463719       | Mus musculus expressed sequence AI463719 (AI463719), mRNA          |
| Up at 24 hrs | A_65_P10390 | 1.33 | 0.012 AF235500.1  | Inpp5d         | Intronic in U000562                                                |
| Up at 24 hrs | A_65_P00615 | 1.33 | 0.031             |                | Intronic in U037661                                                |
| Up at 24 hrs | A_65_P03619 | 1.33 | 0.034             | Umps           | URIDINE 5-MONOPHOSPHATE SYNTHASE (UMP SYNTHASE) [INCLUDES: OROTAT  |
| Up at 24 hrs | A_65_P07655 | 1.33 | 0.037             |                | UNKNOWN                                                            |
| Up at 24 hrs | A_65_P11473 | 1.33 | 0.012 NM_016765.1 | Ddah2          | Mus musculus dimethylarginine dimethylaminohydrolase 2 (Ddah2), m  |
| Up at 24 hrs | A_65_P01752 | 1.33 | 0.014 NM_134000.1 | AI429613       | Mus musculus expressed sequence AI429613 (AI429613), mRNA          |
| Up at 24 hrs | A_65_P02732 | 1.33 | 0.027 BC006812.1  | Slc29a1        | Mus musculus solute carrier family 29 (nucleoside transporters),   |
| Up at 24 hrs | A_65_P08913 | 1.33 | 0.012             | D7Erd807e      | Intronic in U029275                                                |
| Up at 24 hrs | A_65_P12184 | 1.33 | 0.045             |                | UNKNOWN                                                            |
| Up at 24 hrs | A_65_P02554 | 1.32 | 0.001 NM_144942.1 | Csad           | Mus musculus cysteine sulfinic acid decarboxylase (Csad), mRNA     |
| Up at 24 hrs | A_65_P05167 | 1.32 | 0.044 NM_146149.1 | MGC37700       | Mus musculus hypothetical protein MGC37700 (MGC37700), mRNA        |
| Up at 24 hrs | A_65_P05436 | 1.32 | 0.046 NM_133983.1 | AU016588       | Mus musculus expressed sequence AU016588 (AU016588), mRNA          |
| Up at 24 hrs | A_65_P04573 | 1.32 | 0.035 XM_136817.1 |                | Mus musculus similar to KIAA0445 gene product [Homo sapiens] (LOC  |
| Up at 24 hrs | A_65_P04680 | 1.32 | 0.034             |                | UNKNOWN                                                            |
| Up at 24 hrs | A_65_P10496 | 1.32 | 0.010             |                | UNKNOWN                                                            |
| Up at 24 hrs | A_65_P02480 | 1.32 | 0.033             |                | Intronic in U011278                                                |
| Up at 24 hrs | A_65_P04311 | 1.32 | 0.008 NM_009051.1 | Rex2           | Mus musculus reduced expression 2 (Rex2), mRNA                     |
| Up at 24 hrs | A_65_P04512 | 1.32 | 0.047 XM_135485.2 | Dhrsx          | weakly similar to SCAD FAMILY PROTEIN (FRAGMENT) [Mus musculus];   |
| Up at 24 hrs | A_65_P11391 | 1.32 | 0.017             |                | TITIN                                                              |
| Up at 24 hrs | A_65_P00920 | 1.32 | 0.001 NM_030708.1 | Zfh4-pending   | Mus musculus zinc finger homeodomain 4 (Zfh4-pending), mRNA        |
| Up at 24 hrs | A_65_P05659 | 1.32 | 0.046             | 3110054C06Rik  | weakly similar to HYPOTHETICAL 18.5 KDA PROTEIN (FRAGMENT) [Homo   |
| Up at 24 hrs | A_65_P07320 | 1.32 | 0.045 BC034886.1  | RBT1           | Mus musculus replication protein-binding trans-activator (RBT1),   |
| Up at 24 hrs | A_65_P08616 | 1.32 | 0.016 NM_021506.1 | Posh-pending   | Mus musculus plenty of SH3 domains (Posh-pending), mRNA            |
| Up at 24 hrs | A_65_P01111 | 1.32 | 0.040 NM_033562.1 | Flana-pending  | hypothetical protein, MGC: 11613                                   |
| Up at 24 hrs | A_65_P04971 | 1.32 | 0.035 NM_025567.1 | Cyc1           | Mus musculus cytochrome c-1 (Cyc1), mRNA                           |
| Up at 24 hrs | A_65_P09787 | 1.32 | 0.010             |                | Intronic in U008197                                                |
| Up at 24 hrs | A_65_P04712 | 1.31 | 0.042 XM_131404.2 | E130306D19     | hypothetical Dbl domain (dbl/cdc24 rhoGEF family) containing prot  |
| Up at 24 hrs | A_65_P08452 | 1.31 | 0.006             | AI447724       | Mus musculus SH3-domain kinase binding protein 1 (Sh3kbp1), mRNA   |
| Up at 24 hrs | A_65_P00815 | 1.31 | 0.019             |                | UNKNOWN                                                            |
| Up at 24 hrs | A_65_P01635 | 1.31 | 0.043             |                | UNKNOWN                                                            |
| Up at 24 hrs | A_65_P03492 | 1.31 | 0.042 BC006634.1  | Abcb6          | Mus musculus ATP-binding cassette, sub-family B (MDR/TAP), member  |
| Up at 24 hrs | A_65_P01061 | 1.31 | 0.019 NM_000393.2 | Col5a2         | Mus musculus procollagen, type V, alpha 2 (Col5a2), mRNA           |
| Up at 24 hrs | A_65_P02186 | 1.31 | 0.012 XM_145049.1 | AW123102       | UNKNOWN                                                            |
| Up at 24 hrs | A_65_P12392 | 1.31 | 0.018 NM_011594.1 | Timp2          | Mus musculus tissue inhibitor of metalloproteinase 2 (Timp2), mRN  |
| Up at 24 hrs | A_65_P00878 | 1.31 | 0.029             |                | Intronic in U002264                                                |
| Up at 24 hrs | A_65_P03723 | 1.31 | 0.009             |                | Intronic in U008159                                                |
| Up at 24 hrs | A_65_P04867 | 1.31 | 0.004 NM_021435.1 | AB041549       | Mus musculus hypothetical protein, MNCb-4414 (AB041549), mRNA      |
| Up at 24 hrs | A_65_P00691 | 1.31 | 0.012             |                | Intronic in U025609                                                |
| Up at 24 hrs | A_65_P01035 | 1.31 | 0.008             |                | Intronic in U006876                                                |
| Up at 24 hrs | A_65_P01554 | 1.31 | 0.044             |                | UNKNOWN                                                            |
| Up at 24 hrs | A_65_P08462 | 1.31 | 0.037 NM_013681.1 | Syn2           | Mus musculus synapsin II (Syn2), mRNA                              |
| Up at 24 hrs | A_65_P01751 | 1.31 | 0.035 XM_125146.1 |                | UNKNOWN                                                            |
| Up at 24 hrs | A_65_P08501 | 1.31 | 0.026 NM_007856.1 | Dhcr7          | Mus musculus 7-dehydrocholesterol reductase (Dhcr7), mRNA          |

|              |             |      |                   |                 |                                                                   |
|--------------|-------------|------|-------------------|-----------------|-------------------------------------------------------------------|
| Up at 24 hrs | A_65_P04672 | 1.30 | 0.020 NM_016895.1 | Ak2             | Mus musculus adenylate kinase 2 (Ak2), mRNA                       |
| Up at 24 hrs | A_65_P08267 | 1.30 | 0.042             | Cbara1;MGC36503 | CALCIUM BINDING ATOPY RELATED AUTOANTIGEN                         |
| Up at 24 hrs | A_65_P09227 | 1.30 | 0.019             |                 | UNKNOWN                                                           |
| Up at 24 hrs | A_65_P01892 | 1.30 | 0.038 XM_128275.2 | LOC223770       | BROMODOMAIN AND PHD FINGER CONTAINING PROTEIN                     |
| Up at 24 hrs | A_65_P03140 | 1.30 | 0.005 BC026912.1  | Trim6           | TRIPARTITE MOTIF PROTEIN TRIM6 (FRAGMENT). [Source:SPTREMBL;Acc:Q |
| Up at 24 hrs | A_65_P10486 | 1.30 | 0.022             |                 | Mus musculus LOC213321 (LOC213321), mRNA                          |
| Up at 24 hrs | A_65_P01250 | 1.30 | 0.042             |                 | Intronic in U028673                                               |
| Up at 24 hrs | A_65_P11159 | 1.30 | 0.002 NM_029791.2 | Bicd2           | Mus musculus bicaudal D homolog 2 (Drosophila) (Bicd2), mRNA      |
| Up at 24 hrs | A_65_P09497 | 1.30 | 0.003 NM_007728.1 | Coch            | Mus musculus coagulation factor C homolog (Limulus polyphemus) (C |
| Up at 24 hrs | A_65_P09978 | 1.30 | 0.030             |                 | UNKNOWN                                                           |
| Up at 24 hrs | A_65_P02378 | 1.30 | 0.028 NM_022988.1 | Nif31           | Mus musculus Ngg1 interacting factor 3-like 1 (S. pombe) (Nif31)  |
| Up at 24 hrs | A_65_P03239 | 1.30 | 0.036 BC022615.1  | 4933402K10Rik   | Mus musculus RIKEN cDNA 4933402K10 gene (4933402K10Rik), mRNA     |
| Up at 24 hrs | A_65_P09508 | 1.30 | 0.030 NM_013767.2 | Csnk1e          | Mus musculus casein kinase 1, epsilon (Csnk1e), mRNA              |
| Up at 24 hrs | A_65_P01512 | 1.30 | 0.018 AK008890.1  | 2210410P13Rik   | Intronic in U007908                                               |
| Up at 24 hrs | A_65_P11575 | 1.30 | 0.030 AK020424.1  | 9430019C24Rik   | hypothetical Phenylalanine-rich region containing protein         |
| Up at 24 hrs | A_65_P06818 | 1.30 | 0.047             | Xrn1            | Mus musculus 5-3 exoribonuclease 1 (Xrn1), mRNA                   |
| Up at 24 hrs | A_65_P19778 | 1.30 | 0.021 NM_026644.1 | Agpat4          | Mus musculus 1-acylglycerol-3-phosphate O-acyltransferase 1 (lyso |
| Up at 24 hrs | A_65_P01515 | 1.30 | 0.011 BC022685.1  | Solh            | Mus musculus small optic lobes homolog (Drosophila) (Solh), mRNA  |
| Up at 24 hrs | A_65_P01525 | 1.30 | 0.037 NM_134094.1 | D030020D09Rik   | Mus musculus expressed sequence AI848120 (AI848120), mRNA         |
| Up at 24 hrs | A_65_P02084 | 1.30 | 0.044 XM_129934.2 | 2510009N07Rik   | PUTATIVE AUTOPHAGY RELATED CYSTEINE ENDOPEPTIDASE                 |
| Up at 24 hrs | A_65_P02261 | 1.30 | 0.034 NM_020035.1 | Pigo            | Mus musculus phosphatidylinositol glycan, class O (Pigo), mRNA    |
| Up at 24 hrs | A_65_P03028 | 1.30 | 0.004             |                 | Intronic in U028448                                               |
| Up at 24 hrs | A_65_P02714 | 1.29 | 0.030 NM_008873.1 | Plau            | Mus musculus plasminogen activator, urokinase (Plau), mRNA        |
| Up at 24 hrs | A_65_P03321 | 1.29 | 0.038 XM_156390.2 |                 | UNKNOWN                                                           |
| Up at 24 hrs | A_65_P03418 | 1.29 | 0.024 XM_033173.4 |                 | PROTOCOLADHERIN PRECURSOR PCDH                                    |
| Up at 24 hrs | A_65_P03490 | 1.29 | 0.018 NM_009426.1 | Trh             | Mus musculus thyrotropin releasing hormone (Trh), mRNA            |
| Up at 24 hrs | A_65_P07921 | 1.29 | 0.004             |                 | Intronic in U007622                                               |
| Up at 24 hrs | A_65_P02390 | 1.29 | 0.014 BC013212.1  |                 | UNKNOWN                                                           |
| Up at 24 hrs | A_65_P03271 | 1.29 | 0.030 NM_133852.1 | AW555139        | Mus musculus expressed sequence AW555139 (AW555139), mRNA         |
| Up at 24 hrs | A_65_P10296 | 1.29 | 0.009 NM_011653.1 | Tuba1           | UNKNOWN                                                           |
| Up at 24 hrs | A_65_P12841 | 1.29 | 0.046             |                 | KIAA0423 {Homo sapiens}                                           |
| Up at 24 hrs | A_65_P00652 | 1.29 | 0.025 NM_007668.1 | Cdk5            | Mus musculus cyclin-dependent kinase 5 (Cdk5), mRNA               |
| Up at 24 hrs | A_65_P09812 | 1.29 | 0.022 XM_147897.1 | 1110013I11Rik   | Mus musculus tyrosine 3-monooxygenase/tryptophan 5-monooxygenase  |
| Up at 24 hrs | A_65_P10102 | 1.29 | 0.021             | Mgll            | Mus musculus monoglyceride lipase (Mgll), mRNA                    |
| Up at 24 hrs | A_65_P02684 | 1.29 | 0.004             |                 | Intronic in U024360                                               |
| Up at 24 hrs | A_65_P00924 | 1.29 | 0.031 NM_020568.1 | S3-12-pending   | Mus musculus plasma membrane associated protein, S3-12 (S3-12-pen |
| Up at 24 hrs | A_65_P00870 | 1.29 | 0.022 NM_080446.1 | Helb            | Mus musculus helicase (DNA) B (Helb), mRNA                        |
| Up at 24 hrs | A_65_P06126 | 1.29 | 0.014             |                 | UNKNOWN                                                           |
| Up at 24 hrs | A_65_P04194 | 1.29 | 0.047 BC012496.1  | Tcp1-rs1        | T-COMPLEX PROTEIN (TCP-1X) (FRAGMENT). [Source:SPTREMBL;Acc:Q6229 |
| Up at 24 hrs | A_65_P00884 | 1.28 | 0.047 AK041563.1  |                 | Intronic in U041800                                               |
| Up at 24 hrs | A_65_P02897 | 1.28 | 0.031 BC020081.1  | 2310016C08Rik   | Mus musculus RIKEN cDNA 2310016C08 gene (2310016C08Rik), mRNA     |
| Up at 24 hrs | A_65_P00908 | 1.28 | 0.002             |                 | UNKNOWN                                                           |
| Up at 24 hrs | A_65_P03452 | 1.28 | 0.044             | 1700108N18Rik   | PLACENTAL PROTEIN DIFF40                                          |
| Up at 24 hrs | A_65_P06814 | 1.28 | 0.030 NM_010743.1 | Il1r1           | Mus musculus interleukin 1 receptor-like 1 (Il1r1), mRNA          |
| Up at 24 hrs | A_65_P00965 | 1.28 | 0.021 BC005770.1  | Becn1           | Mus musculus beclin 1 (coiled-coil, myosin-like BCL2-interacting  |
| Up at 24 hrs | A_65_P01645 | 1.28 | 0.040             |                 | Intronic in U006661                                               |
| Up at 24 hrs | A_65_P03156 | 1.28 | 0.039 XM_147662.1 |                 | UNKNOWN                                                           |
| Up at 24 hrs | A_65_P03283 | 1.28 | 0.015 BC034865.1  | AW476095        | UNKNOWN                                                           |
| Up at 24 hrs | A_65_P05431 | 1.28 | 0.036             |                 | UNKNOWN                                                           |
| Up at 24 hrs | A_65_P11637 | 1.28 | 0.025             |                 | UNKNOWN                                                           |
| Up at 24 hrs | A_65_P03779 | 1.28 | 0.000             | AA408985        | Mus musculus DnaJ (Hsp40) homolog, subfamily C, member 3 (Dnajc3) |
| Up at 24 hrs | A_65_P18818 | 1.28 | 0.037 NM_020276.2 | Nelf            | Mus musculus nasal embryonic LHRH factor (Nelf), mRNA             |
| Up at 24 hrs | A_65_P02368 | 1.28 | 0.024 XM_149077.1 | 4921525D07Rik   | Mus musculus RIKEN cDNA 4921525D07 gene (4921525D07Rik), mRNA     |
| Up at 24 hrs | A_65_P02396 | 1.28 | 0.032             |                 | Intronic in U015238                                               |
| Up at 24 hrs | A_65_P02466 | 1.28 | 0.039             |                 | Intronic in U022132                                               |
| Up at 24 hrs | A_65_P03438 | 1.28 | 0.010 NM_009327.1 | Tcf1            | Mus musculus transcription factor 1 (Tcf1), mRNA                  |
| Up at 24 hrs | A_65_P05428 | 1.28 | 0.001 XM_125884.2 |                 | TRANSMEMBRANE PROTEIN VEZATIN homolog [Homo sapiens]              |
| Up at 24 hrs | A_65_P05903 | 1.28 | 0.040 NM_008800.1 | Pde1b           | Mus musculus phosphodiesterase 1B, Ca2+-calmodulin dependent, 63  |

|              |             |      |                   |               |                                                                   |
|--------------|-------------|------|-------------------|---------------|-------------------------------------------------------------------|
| Up at 24 hrs | A_65_P16541 | 1.28 | 0.020             |               | Intronic in U027077                                               |
| Up at 24 hrs | A_65_P03077 | 1.28 | 0.046             |               | KIAA1627 PROTEIN (FRAGMENT) homolog [Homo sapiens]                |
| Up at 24 hrs | A_65_P00847 | 1.28 | 0.025 XM_132664.2 |               | Mus musculus similar to hypothetical protein FLJ10916 [Homo sapie |
| Up at 24 hrs | A_65_P03614 | 1.28 | 0.003 NM_003583.2 | 4932442E05Rik | Similar to: Mus musculus similar to Dual-specificity tyrosine-pho |
| Up at 24 hrs | A_65_P07719 | 1.28 | 0.021 NM_022310.1 |               | UNKNOWN                                                           |
| Up at 24 hrs | A_65_P01647 | 1.27 | 0.042             |               | Intronic in U014857                                               |
| Up at 24 hrs | A_65_P01305 | 1.27 | 0.004 NM_009149.1 | Selel         | Mus musculus selectin, endothelial cell, ligand (Selel), mRNA     |
| Up at 24 hrs | A_65_P02383 | 1.27 | 0.013             |               | UNKNOWN                                                           |
| Up at 24 hrs | A_65_P01109 | 1.27 | 0.026             |               | UNKNOWN                                                           |
| Up at 24 hrs | A_65_P06860 | 1.27 | 0.030 XM_130286.1 | LOC228140     | KIAA1741 protein {Homo sapiens}                                   |
| Up at 24 hrs | A_65_P11812 | 1.27 | 0.032             |               | UNKNOWN                                                           |
| Up at 24 hrs | A_65_P02199 | 1.27 | 0.009 NM_153484.1 | Tef           | Mus musculus thymotroph embryonic factor (Tef), transcript varian |
| Up at 24 hrs | A_65_P04866 | 1.27 | 0.011             | 4930509H03Rik | KIAA0806 PROTEIN homolog [Homo sapiens]                           |
| Up at 24 hrs | A_65_P01166 | 1.27 | 0.007 NM_026591.1 | 2010005E08Rik | hypothetical Translation proteins SH3-like domain structure conta |
| Up at 24 hrs | A_65_P01322 | 1.27 | 0.024             | Cul4b         | Mus musculus cullin 4B (Cul4b), mRNA                              |
| Up at 24 hrs | A_65_P01403 | 1.27 | 0.008             | C76972        | Possibly wrong strand                                             |
| Up at 24 hrs | A_65_P01816 | 1.27 | 0.043             | D2ErtD93e     | UNKNOWN                                                           |
| Up at 24 hrs | A_65_P04433 | 1.27 | 0.044             |               | UNKNOWN                                                           |
| Up at 24 hrs | A_65_P08363 | 1.27 | 0.015             | T25625        | UNKNOWN                                                           |
| Up at 24 hrs | A_65_P10264 | 1.27 | 0.005             |               | UNKNOWN                                                           |
| Up at 24 hrs | A_65_P01047 | 1.27 | 0.021             | 2310033A20Rik | UNKNOWN                                                           |
| Up at 24 hrs | A_65_P02770 | 1.27 | 0.045 NM_009084.1 | Rpl37a        | 60S RIBOSOMAL PROTEIN L37A. [Source:SWISSPROT;Acc:P12751]         |
| Up at 24 hrs | A_65_P05265 | 1.27 | 0.031 NM_016781.1 | Prkag1        | Mus musculus protein kinase, AMP-activated, gamma 1 non-catalytic |
| Up at 24 hrs | A_65_P09800 | 1.27 | 0.029             |               | Intronic in U042742                                               |
| Up at 24 hrs | A_65_P02013 | 1.27 | 0.032 NM_146165.1 | MGC37389      | Mus musculus hypothetical protein MGC37389 (MGC37389), mRNA       |
| Up at 24 hrs | A_65_P19046 | 1.27 | 0.013 XM_149100.2 |               | Mus musculus LOC227665 (LOC227665), mRNA                          |
| Up at 24 hrs | A_65_P06794 | 1.27 | 0.017             |               | Intronic in U037368                                               |
| Up at 24 hrs | A_65_P01806 | 1.26 | 0.020             |               | UNKNOWN                                                           |
| Up at 24 hrs | A_65_P02091 | 1.26 | 0.036             |               | UNKNOWN                                                           |
| Up at 24 hrs | A_65_P03933 | 1.26 | 0.044 D49473.1    | Sox17         | Mus musculus SRY-box containing gene 17 (Sox17), mRNA             |
| Up at 24 hrs | A_65_P03958 | 1.26 | 0.046             | Ccnh          | Intronic in U043353                                               |
| Up at 24 hrs | A_65_P05439 | 1.26 | 0.016 NM_144921.1 | MGC27631      | Mus musculus hypothetical protein MGC27631 (MGC27631), mRNA       |
| Up at 24 hrs | A_65_P07458 | 1.26 | 0.005             | AU022521      | hypothetical S-adenosyl-L-methionine-dependent methyltransferases |
| Up at 24 hrs | A_65_P00713 | 1.26 | 0.023             |               | Intronic in U017093                                               |
| Up at 24 hrs | A_65_P01189 | 1.26 | 0.040 NM_153505.1 | 4930568P13Rik | NCK ASSOCIATED PROTEIN 1 NAP 1 P125NAP1 MEMBRANE ASSOCIATED PROTE |
| Up at 24 hrs | A_65_P03251 | 1.26 | 0.028 NM_133859.1 | 2810002E22Rik | UNKNOWN                                                           |
| Up at 24 hrs | A_65_P06983 | 1.26 | 0.030 U48363.1    | Naca          | Mus musculus transcriptional activator alpha-NAC (Naca) gene, com |
| Up at 24 hrs | A_65_P07432 | 1.26 | 0.011 XM_126253.2 | AW550801      | Mus musculus similar to KIAA1401 protein [Homo sapiens] (LOC21695 |
| Up at 24 hrs | A_65_P03620 | 1.26 | 0.011             |               | UNKNOWN                                                           |
| Up at 24 hrs | A_65_P04486 | 1.26 | 0.027 NM_172892.1 | 9630060C05    | SODIUM/DICARBOXYLATE COTRANSPORTER NA + /DICARBOXYLATE            |
| Up at 24 hrs | A_65_P04569 | 1.26 | 0.027             |               | Intronic in U025365                                               |
| Up at 24 hrs | A_65_P01913 | 1.26 | 0.033             |               | UNKNOWN                                                           |
| Up at 24 hrs | A_65_P06020 | 1.26 | 0.047             |               | UNKNOWN                                                           |
| Up at 24 hrs | A_65_P16769 | 1.26 | 0.003 NM_009201.1 | Slc1a7        | Mus musculus solute carrier family 1, member 7 (Slc1a7), mRNA     |
| Up at 24 hrs | A_65_P02170 | 1.26 | 0.046 NM_173013.1 | 6430517J16    | weakly similar to CLAUSTRIN [Gallus gallus]                       |
| Up at 24 hrs | A_65_P05281 | 1.26 | 0.037 NM_031975.1 | Ptms          | PARATHYMOXIN ZINC BINDING 11.5 KDA                                |
| Up at 24 hrs | A_65_P09832 | 1.26 | 0.034 XM_127565.2 | AL024016      | FILAMIN A ALPHA FILAMIN FILAMIN 1 ENDOTHELIAL ACTIN BINDING PROTE |
| Up at 24 hrs | A_65_P03746 | 1.26 | 0.044 NM_027867.1 | D12ErtD407e   | Mus musculus DNA segment, Chr 12, ERATO Doi 407, expressed (D12Er |
| Up at 24 hrs | A_65_P00839 | 1.26 | 0.007 NM_133226.1 | Pdzk2         | Mus musculus sodium-phosphate cotransporter Ila C-terminal-assoc  |
| Up at 24 hrs | A_65_P00923 | 1.26 | 0.043             |               | Intronic in U035327                                               |
| Up at 24 hrs | A_65_P12772 | 1.26 | 0.043             |               | Intronic in U015305                                               |
| Up at 24 hrs | A_65_P01619 | 1.25 | 0.041             |               | UNKNOWN                                                           |
| Up at 24 hrs | A_65_P01704 | 1.25 | 0.013 AL832353.1  | 2310065E01Rik | Mus musculus sorbin and SH3 domain containing 1 (Sorbs1), mRNA    |
| Up at 24 hrs | A_65_P06046 | 1.25 | 0.027 NM_007472.1 | Aqp1          | Mus musculus aquaporin 1 (Aqp1), mRNA                             |
| Up at 24 hrs | A_65_P00534 | 1.25 | 0.050             | A1585901      | UNKNOWN                                                           |
| Up at 24 hrs | A_65_P04478 | 1.25 | 0.023 XM_148185.2 | Pros1         | VITAMIN K-DEPENDENT PROTEIN S PRECURSOR. [Source:SWISSPROT;Acc:Q0 |
| Up at 24 hrs | A_65_P01385 | 1.25 | 0.041 AK021144.1  | C030044C12Rik | UNKNOWN                                                           |
| Up at 24 hrs | A_65_P04012 | 1.25 | 0.032             |               | UNKNOWN                                                           |



|              |             |      |                   |               |                                                                   |
|--------------|-------------|------|-------------------|---------------|-------------------------------------------------------------------|
| Up at 24 hrs | A_65_P16923 | 1.25 | 0.032             | C81302        | UNKNOWN                                                           |
| Up at 24 hrs | A_65_P02296 | 1.25 | 0.029 XM_133255.1 | Ceacam1       | Similar to: Mouse hepatitis virus receptor mRNA, complete cds     |
| Up at 24 hrs | A_65_P02879 | 1.25 | 0.038 NM_022653.1 | Thop1         | Mus musculus thimet oligopeptidase 1 (Thop1), mRNA                |
| Up at 24 hrs | A_65_P16259 | 1.25 | 0.037 XM_127796.1 |               | weakly similar to CDNA: FLJ21562 FIS, CLONE COL06420 [Homo sapien |
| Up at 24 hrs | A_65_P03927 | 1.25 | 0.028             | Arhgap7       | Intronic in U029734                                               |
| Up at 24 hrs | A_65_P04719 | 1.25 | 0.034 NM_031392.1 | Wdr6          | REPEAT-SEQUENCE                                                   |
| Up at 24 hrs | A_65_P11872 | 1.25 | 0.049             |               | Intronic in U014162                                               |
| Up at 24 hrs | A_65_P01095 | 1.25 | 0.027 NM_019781.1 | Pex14         | UNKNOWN                                                           |
| Up at 24 hrs | A_65_P04693 | 1.25 | 0.035 NM_133224.1 | catp          | Mus musculus cation-transporting atpase (catp), mRNA              |
| Up at 24 hrs | A_65_P00701 | 1.25 | 0.030             |               | Intronic in U038969                                               |
| Up at 24 hrs | A_65_P06317 | 1.25 | 0.019             |               | UNKNOWN                                                           |
| Up at 24 hrs | A_65_P09283 | 1.24 | 0.023 XM_124488.1 | Nos3          | Mus musculus nitric oxide synthase 3, endothelial cell (Nos3), mR |
| Up at 24 hrs | A_65_P02234 | 1.24 | 0.033 XM_123713.1 |               | 38597 Mus musculus septin 2 (Sept2), mRNA                         |
| Up at 24 hrs | A_65_P06130 | 1.24 | 0.020             |               | UNKNOWN                                                           |
| Up at 24 hrs | A_65_P02292 | 1.24 | 0.022 NM_024274.1 | 2810431B21Rik | Mus musculus RIKEN cDNA 2810431B21 gene (2810431B21Rik), mRNA     |
| Up at 24 hrs | A_65_P03955 | 1.24 | 0.020 XM_150310.1 |               | Mus musculus LOC236038 (LOC236038), mRNA                          |
| Up at 24 hrs | A_65_P07435 | 1.24 | 0.033 NM_026342.1 | 9030624B09Rik | Mus musculus RIKEN cDNA 9030624B09 gene (9030624B09Rik), mRNA     |
| Up at 24 hrs | A_65_P07615 | 1.24 | 0.013 NM_013791.1 | Mklin1        | Mus musculus muskelin 1, intracellular mediator containing kelch  |
| Up at 24 hrs | A_65_P04890 | 1.24 | 0.034 NM_025729.1 | 4921526G09Rik | Mus musculus RIKEN cDNA 4921526G09 gene (4921526G09Rik), mRNA     |
| Up at 24 hrs | A_65_P06985 | 1.24 | 0.015             |               | UNKNOWN                                                           |
| Up at 24 hrs | A_65_P01444 | 1.24 | 0.030             |               | REPEAT-SEQUENCE                                                   |
| Up at 24 hrs | A_65_P04666 | 1.24 | 0.017 AJ308636.1  | Sufu          | Mus musculus suppressor of fused homolog (Drosophila) (Sufu), mRN |
| Up at 24 hrs | A_65_P05746 | 1.24 | 0.038 BC021511.1  |               | UNKNOWN                                                           |
| Up at 24 hrs | A_65_P06867 | 1.24 | 0.035             |               | UNKNOWN                                                           |
| Up at 24 hrs | A_65_P03142 | 1.24 | 0.014 XM_150006.1 |               | Mus musculus LOC233771 (LOC233771), mRNA                          |
| Up at 24 hrs | A_65_P12048 | 1.24 | 0.023             | C85939        | UNKNOWN                                                           |
| Up at 24 hrs | A_65_P08351 | 1.24 | 0.048             |               | Similar to: Mus musculus EMX2OS mRNA, complete sequence           |
| Up at 24 hrs | A_65_P00925 | 1.24 | 0.011             |               | UNKNOWN                                                           |
| Up at 24 hrs | A_65_P01651 | 1.24 | 0.047 XM_127478.1 | 2610028H14    | MITOCHONDRIAL 28S RIBOSOMAL PROTEIN S27 MRP                       |
| Up at 24 hrs | A_65_P01043 | 1.23 | 0.043 XM_128842.1 | 1110001N06Rik | Mus musculus RIKEN cDNA 1110001N06 gene (1110001N06Rik), mRNA     |
| Up at 24 hrs | A_65_P02456 | 1.23 | 0.032 XM_126120.2 | Aldo3         | UNKNOWN                                                           |
| Up at 24 hrs | A_65_P20814 | 1.23 | 0.026 NM_029236.1 | 4930556P03Rik | Mus musculus RIKEN cDNA 4930556P03 gene (4930556P03Rik), mRNA     |
| Up at 24 hrs | A_65_P03240 | 1.23 | 0.034 NM_011976.1 | Sema4g        | Mus musculus sema domain, immunoglobulin domain (Ig), transmembra |
| Up at 24 hrs | A_65_P15126 | 1.23 | 0.006 NM_027278.1 | 2810432D09Rik | Mus musculus RIKEN cDNA 2810432D09 gene (2810432D09Rik), mRNA     |
| Up at 24 hrs | A_65_P01328 | 1.23 | 0.025 NM_025335.1 | 0610041E09Rik | Mus musculus RIKEN cDNA 0610041E09 gene (0610041E09Rik), mRNA     |
| Up at 24 hrs | A_65_P12062 | 1.23 | 0.019 XM_132298.2 | C730029A10    | TFIIH BASAL TRANSCRIPTION FACTOR COMPLEX P34 SUBUNIT BASIC TRANSC |
| Up at 24 hrs | A_65_P12514 | 1.23 | 0.000 NM_024256.1 | B3Gat3        | Mus musculus beta-1,3-glucuronyltransferase 3 (glucuronosyltransf |
| Up at 24 hrs | A_65_P02115 | 1.23 | 0.030 NM_025848.1 | 3110001M13Rik | SUCCINATE DEHYDROGENASE [UBIQUINONE] CYTOCHROME B SMALL SUBUNIT,  |
| Up at 24 hrs | A_65_P02354 | 1.23 | 0.005 NM_029780.1 | Raf1          | Mus musculus v-raf-1 leukemia viral oncogene 1 (Raf1), mRNA       |
| Up at 24 hrs | A_65_P03542 | 1.23 | 0.006 XM_135087.2 | 1110018N24Rik | GLUTAMINYL TRNA SYNTHETASE EC 6.1.1.18 GLUTAMINE TRNA LIGASE      |
| Up at 24 hrs | A_65_P09435 | 1.23 | 0.012 XM_133651.2 | 1810020D17Rik | SIMILAR TO PTD015                                                 |
| Up at 24 hrs | A_65_P11262 | 1.23 | 0.020             | C79710        | UNKNOWN                                                           |
| Up at 24 hrs | A_65_P02152 | 1.23 | 0.033 BC028558.1  | AU022376      | Mus musculus RIKEN cDNA 6430511D02 gene (6430511D02Rik), mRNA     |
| Up at 24 hrs | A_65_P03831 | 1.23 | 0.009             |               | UNKNOWN                                                           |
| Up at 24 hrs | A_65_P07612 | 1.23 | 0.045             |               | Intronic in U005616                                               |
| Up at 24 hrs | A_65_P10606 | 1.23 | 0.034 NM_025285.1 | Stmn2         | superiorcervical ganglia, neural specific 10                      |
| Up at 24 hrs | A_65_P01699 | 1.23 | 0.003 XM_147434.2 | 4921506J03Rik | Mus musculus RIKEN cDNA 4921506J03 gene (4921506J03Rik), mRNA     |
| Up at 24 hrs | A_65_P03524 | 1.23 | 0.021             |               | UNKNOWN                                                           |
| Up at 24 hrs | A_65_P04664 | 1.23 | 0.032             |               | Intronic in U004598                                               |
| Up at 24 hrs | A_65_P07803 | 1.23 | 0.018 BC028923.1  | Eif2ak1       | EUKARYOTIC TRANSLATION INITIATION FACTOR 2 ALPHA KINASE 1 (EC 2.7 |
| Up at 24 hrs | A_65_P11771 | 1.23 | 0.029 NM_019651.1 | Ptpn9         | Mus musculus protein tyrosine phosphatase, non-receptor type 9 (P |
| Up at 24 hrs | A_65_P14276 | 1.23 | 0.027 XM_134049.2 | C130008N12    | unnamed protein product {Homo sapiens}                            |
| Up at 24 hrs | A_65_P04010 | 1.23 | 0.000             | AU045128      | UNKNOWN                                                           |
| Up at 24 hrs | A_65_P08513 | 1.23 | 0.047 NM_007631.1 | Ccnd1         | Similar to: Mus musculus cyclin D1 (Ccnd1), mRNA                  |
| Up at 24 hrs | A_65_P15398 | 1.23 | 0.048 XM_127310.1 | C4st-pending  | UNKNOWN                                                           |
| Up at 24 hrs | A_65_P00712 | 1.23 | 0.033 BC005511.1  |               | Mus musculus, clone IMAGE:3492383, mRNA                           |
| Up at 24 hrs | A_65_P03263 | 1.23 | 0.022 NM_023305.2 | Ubap1         | Mus musculus ubiquitin-associated protein 1 (Ubap1), mRNA         |
| Up at 24 hrs | A_65_P03930 | 1.23 | 0.030 XM_124384.2 | Sfn           | Mus musculus stratifin (Sfn), mRNA                                |

|              |             |      |                   |               |                                                                   |
|--------------|-------------|------|-------------------|---------------|-------------------------------------------------------------------|
| Up at 24 hrs | A_65_P05187 | 1.23 | 0.006 XM_130834.1 | LOC229227     | Mus musculus similar to CG4841 gene product [Drosophila melanogas |
| Up at 24 hrs | A_65_P02129 | 1.22 | 0.004 XM_127736.1 | Rnf17         | Mus musculus ring finger protein 17 (Rnf17), mRNA                 |
| Up at 24 hrs | A_65_P02117 | 1.22 | 0.044             | 2700083B06Rik | Mus musculus RIKEN cDNA 2700083B06 gene (2700083B06Rik), mRNA     |
| Up at 24 hrs | A_65_P05896 | 1.22 | 0.038 BC025808.1  | 9030624J02Rik | Mus musculus RIKEN cDNA 9030624J02 gene (9030624J02Rik), mRNA     |
| Up at 24 hrs | A_65_P09925 | 1.22 | 0.046 U79738.1    | Dlx3          | UNKNOWN                                                           |
| Up at 24 hrs | A_65_P02994 | 1.22 | 0.047             |               | REPEAT-SEQUENCE                                                   |
| Up at 24 hrs | A_65_P04192 | 1.22 | 0.021             | Lrrfp2        | SIMILAR TO LEUCINE RICH REPEAT IN FLII INTERACTING PROTEIN        |
| Up at 24 hrs | A_65_P01252 | 1.22 | 0.023 NM_007485.2 | Arhd          | Mus musculus ras homolog gene family, member D (Arhd), mRNA       |
| Up at 24 hrs | A_65_P04229 | 1.22 | 0.019 NM_025476.1 | AI449062      | Intronic in U004106                                               |
| Up at 24 hrs | A_65_P07743 | 1.22 | 0.004 NM_023740.1 | 1500015N03Rik | ABL-PHILIN 2. [Source:RefSeq;Acc:NM_023740]                       |
| Up at 24 hrs | A_65_P08566 | 1.22 | 0.013 XM_131485.1 |               | DJ44A20                                                           |
| Up at 24 hrs | A_65_P08935 | 1.22 | 0.012             |               | hypothetical SET-domain of transcriptional regulators (TRX, EZ, A |
| Up at 24 hrs | A_65_P10170 | 1.22 | 0.008             |               | Intronic in U012592                                               |
| Up at 24 hrs | A_65_P05817 | 1.22 | 0.027 NM_008501.1 | Lif           | Mus musculus leukemia inhibitory factor (Lif), mRNA               |
| Up at 24 hrs | A_65_P02272 | 1.22 | 0.036 XM_123093.1 | Rgl2          | Mus musculus ral guanine nucleotide dissociation stimulator,-like |
| Up at 24 hrs | A_65_P02862 | 1.22 | 0.012             |               | UNKNOWN                                                           |
| Up at 24 hrs | A_65_P08124 | 1.22 | 0.017 BC026523.1  | Tce1          | Mus musculus T-complex expressed gene 1 (Tce1), mRNA              |
| Up at 24 hrs | A_65_P01903 | 1.22 | 0.007 NM_023277.1 | Jcam3         | junction cell adhesion molecule 3                                 |
| Up at 24 hrs | A_65_P10117 | 1.22 | 0.026             |               | UNKNOWN                                                           |
| Up at 24 hrs | A_65_P01637 | 1.22 | 0.012 BC016492.1  | Tgm2          | Mus musculus transglutaminase 2, C polypeptide (Tgm2), mRNA       |
| Up at 24 hrs | A_65_P03525 | 1.22 | 0.047 AK017703.1  | 5730478J10Rik | Mus musculus 8 days embryo whole body cDNA, RIKEN full-length enr |
| Up at 24 hrs | A_65_P05954 | 1.22 | 0.031             |               | UNKNOWN                                                           |
| Up at 24 hrs | A_65_P07715 | 1.22 | 0.012 BC006713.1  | Dagk1         | Mus musculus diacylglycerol kinase, alpha (80 kDa) (Dagk1), mRNA  |
| Up at 24 hrs | A_65_P08597 | 1.22 | 0.021             | A930036P18Rik | HYPOTHETICAL 39.3 KDA PROTEIN (FRAGMENT). [Source:SPTREMBL;Acc:Q9 |
| Up at 24 hrs | A_65_P04384 | 1.21 | 0.050 AF408433.1  | 2700094F01Rik | CDNA FLJ14803 FIS, CLONE NT2RP4001442 homolog [Homo sapiens]      |
| Up at 24 hrs | A_65_P01624 | 1.21 | 0.010 NM_003470.1 | USP7          | Similar to: Homo sapiens ubiquitin specific protease 7 (herpes vi |
| Up at 24 hrs | A_65_P10308 | 1.21 | 0.008 NM_025577.1 | 2810428I15Rik | Mus musculus RIKEN cDNA 2810428I15 gene (2810428I15Rik), mRNA     |
| Up at 24 hrs | A_65_P00879 | 1.21 | 0.044 NM_011390.1 | Slc12a7       | Mus musculus solute carrier family 12, member 7 (Slc12a7), mRNA   |
| Up at 24 hrs | A_65_P03728 | 1.21 | 0.041             | AI467004      | UNKNOWN                                                           |
| Up at 24 hrs | A_65_P10698 | 1.21 | 0.027 NM_172545.1 | 9230102N17Rik | similar to CDNA FLJ12879 FIS, CLONE NT2RP2003857, WEAKLY SIMILAR  |
| Up at 24 hrs | A_65_P11328 | 1.21 | 0.007             |               | UNKNOWN                                                           |
| Up at 24 hrs | A_65_P12567 | 1.21 | 0.021 NM_019435.1 | Np15          | Mus musculus neuronal protein 15.6 (Np15.6-pending), mRNA         |
| Up at 24 hrs | A_65_P10108 | 1.21 | 0.012             |               | UNKNOWN                                                           |
| Up at 24 hrs | A_65_P04452 | 1.21 | 0.027 BC006885.1  | AI481772      | Similar to: Mus musculus, clone IMAGE:4511549, mRNA               |
| Up at 24 hrs | A_65_P04518 | 1.21 | 0.028 XM_132526.2 | AI646570      | 49J10.1.2 (ANDROGEN-INDUCED PROSTATE PROLIFERATIVE SHUTOFF ASSOCI |
| Up at 24 hrs | A_65_P01204 | 1.21 | 0.033             |               | Intronic in U043508                                               |
| Up at 24 hrs | A_65_P02107 | 1.21 | 0.022             |               | Intronic in U021257                                               |
| Up at 24 hrs | A_65_P00813 | 1.21 | 0.012             | 9130020K17Rik | CDNA FLJ13099 FIS, CLONE NT2RP3002248 homolog [Homo sapiens]      |
| Up at 24 hrs | A_65_P02777 | 1.21 | 0.005 NM_146122.1 | MGC38995      | Mus musculus hypothetical protein MGC38995 (MGC38995), mRNA       |
| Up at 24 hrs | A_65_P04713 | 1.21 | 0.032 NM_026542.1 | 3010027G13Rik | Mus musculus RIKEN cDNA 3010027G13 gene (3010027G13Rik), mRNA     |
| Up at 24 hrs | A_65_P11447 | 1.21 | 0.016 NM_015186.1 |               | CHOREIN CHOREA ACANTHOCYTOSIS                                     |
| Up at 24 hrs | A_65_P17067 | 1.21 | 0.003 XM_125723.2 | 3110056O03Rik | Similar to: Mus musculus RIKEN cDNA 3110056O03 gene (3110056O03Ri |
| Up at 24 hrs | A_65_P08844 | 1.20 | 0.027             |               | Intronic in U006654                                               |
| Up at 24 hrs | A_65_P10065 | 1.20 | 0.029             |               | UNKNOWN                                                           |
| Up at 24 hrs | A_65_P09663 | 1.20 | 0.013 NM_027141.1 | Tce1          | UNKNOWN                                                           |
| Up at 24 hrs | A_65_P10899 | 1.20 | 0.049 BC005450.1  | lcsbp         | Mus musculus interferon concensus sequence binding protein (lcsbp |
| Up at 24 hrs | A_65_P00648 | 1.20 | 0.020 NM_134151.1 | Yars          | Mus musculus tyrosyl-tRNA synthetase (Yars), mRNA                 |
| Up at 24 hrs | A_65_P01543 | 1.20 | 0.029 NM_134024.1 | AI451582      | Mus musculus expressed sequence AI451582 (AI451582), mRNA         |
| Up at 24 hrs | A_65_P09786 | 1.20 | 0.026 M60510.1    |               | UNKNOWN                                                           |
| Up at 24 hrs | A_65_P03537 | 1.20 | 0.016             |               | UNKNOWN                                                           |
| Up at 24 hrs | A_65_P04485 | 1.20 | 0.035 NM_009741.1 | Bcl2          | Mus musculus B-cell leukemia/lymphoma 2 (Bcl2), mRNA              |
| Up at 24 hrs | A_65_P01414 | 1.20 | 0.030 BC019551.1  |               | Intronic in U017662                                               |
| Up at 24 hrs | A_65_P01718 | 1.20 | 0.001 NM_018886.1 | Lgals8        | UNKNOWN                                                           |
| Up at 24 hrs | A_65_P06137 | 1.20 | 0.039 NM_011952.1 | Mapk3         | Mus musculus mitogen activated protein kinase 3 (Mapk3), mRNA     |
| Up at 24 hrs | A_65_P00561 | 1.20 | 0.010             |               | UNKNOWN                                                           |
| Up at 24 hrs | A_65_P01019 | 1.20 | 0.030             |               | Intronic in U039530                                               |
| Up at 24 hrs | A_65_P12773 | 1.20 | 0.020             | 4833422F06Rik | Similar to: Mus musculus, Similar to hypothetical protein FLJ1023 |
| Up at 24 hrs | A_65_P01303 | 1.20 | 0.025 NM_031374.1 | Tex15         | Mus musculus testis expressed gene 15 (Tex15), mRNA               |

|              |             |      |                   |                        |                                                                   |
|--------------|-------------|------|-------------------|------------------------|-------------------------------------------------------------------|
| Up at 24 hrs | A_65_P01324 | 1.20 | 0.008             |                        | UNKNOWN                                                           |
| Up at 24 hrs | A_65_P06440 | 1.20 | 0.050             |                        | UNKNOWN                                                           |
| Up at 24 hrs | A_65_P03514 | 1.20 | 0.042 NM_025428.1 | 1190004A01Rik          | Mus musculus RIKEN cDNA 1190004A01 gene (1190004A01Rik), mRNA     |
| Up at 24 hrs | A_65_P06612 | 1.19 | 0.017 NM_153470.1 | A1836570               | UNKNOWN                                                           |
| Up at 24 hrs | A_65_P09639 | 1.19 | 0.000             |                        | UNKNOWN                                                           |
| Up at 24 hrs | A_65_P12845 | 1.19 | 0.023 NM_013749.1 | Tnfrsf12a              | UNKNOWN                                                           |
| Up at 24 hrs | A_65_P12096 | 1.19 | 0.000 BC027845.1  | Wbp3                   | WW DOMAIN BINDING PROTEIN 3 (FRAGMENT). [Source:SPTREMBL;Acc:O085 |
| Up at 24 hrs | A_65_P12424 | 1.19 | 0.049             |                        | CEREBELLIN                                                        |
| Up at 24 hrs | A_65_P10708 | 1.19 | 0.019             | Scly                   | Mus musculus selenocysteine lyase (Scly), mRNA                    |
| Up at 24 hrs | A_65_P15285 | 1.19 | 0.015 BC033416.1  | Il1r1                  | Mus musculus interleukin 1 receptor-like 1 (Il1r1), mRNA          |
| Up at 24 hrs | A_65_P18508 | 1.19 | 0.016 NM_138598.2 | D11Wsu99e              | Mus musculus DNA segment, Chr 11, Wayne State University 99, expr |
| Up at 24 hrs | A_65_P03144 | 1.19 | 0.022 NM_013778.1 | Akr1c13                | UNKNOWN                                                           |
| Up at 24 hrs | A_65_P07271 | 1.19 | 0.021             |                        | UNKNOWN                                                           |
| Up at 24 hrs | A_65_P02562 | 1.19 | 0.028 XM_128379.2 |                        | SYNAPTOJANIN EC 3.1.3.56 SYNAPTIC INOSITOL 1,4,5 TRISPHOSPHATE 5  |
| Up at 24 hrs | A_65_P02273 | 1.19 | 0.015             |                        | UNKNOWN                                                           |
| Up at 24 hrs | A_65_P05053 | 1.19 | 0.014 NM_172549.1 | A330070M20             | CALCINEURIN BINDING PROTEIN CABIN 1 CALCINEURIN INHIBITOR         |
| Up at 24 hrs | A_65_P05469 | 1.19 | 0.015 NM_021565.1 | Midn                   | UNKNOWN                                                           |
| Up at 24 hrs | A_65_P10483 | 1.19 | 0.020 NM_019715.1 | 1700094M07Rik          | POTASSIUM CHANNEL MODULATORY FACTOR DEBT-91; CLONE DEBT-91. [Sour |
| Up at 24 hrs | A_65_P08858 | 1.19 | 0.050 NM_011822.1 | Pigq                   | Mus musculus phosphatidylinositol glycan, class Q (Pigq), mRNA    |
| Up at 24 hrs | A_65_P14555 | 1.19 | 0.032             | D2ErtD239e             | UNKNOWN                                                           |
| Up at 24 hrs | A_65_P00926 | 1.18 | 0.011 XM_067369.1 |                        | Possibly wrong strand                                             |
| Up at 24 hrs | A_65_P01847 | 1.18 | 0.037             |                        | Intronic in U020816                                               |
| Up at 24 hrs | A_65_P01200 | 1.18 | 0.031             | 2900064A13Rik          | Mus musculus RIKEN cDNA 2900064A13 gene (2900064A13Rik), mRNA     |
| Up at 24 hrs | A_65_P01318 | 1.18 | 0.047             | 4932441P04Rik;Trp53bp1 | GAMMA TUBULIN COMPLEX COMPONENT 4 GCP                             |
| Up at 24 hrs | A_65_P02267 | 1.18 | 0.046 XM_128124.2 |                        | hypothetical Trp-Asp (WD) repeats circular profile containing pro |
| Up at 24 hrs | A_65_P06710 | 1.18 | 0.038             | A1197444               | ETHANOLAMINE KINASE                                               |
| Up at 24 hrs | A_65_P01265 | 1.18 | 0.018 NM_033565.1 | Laf4l                  | Mus musculus lymphoid nuclear protein related to AF4-like (Laf4l) |
| Up at 24 hrs | A_65_P02224 | 1.18 | 0.049             |                        | REPEAT-SEQUENCE                                                   |
| Up at 24 hrs | A_65_P02376 | 1.18 | 0.014             | A1428889               | UNKNOWN                                                           |
| Up at 24 hrs | A_65_P03914 | 1.18 | 0.019 NM_015818.1 | Hs6st1                 | Mus musculus heparan sulfate 6-O-sulfotransferase 1 (Hs6st1), mRN |
| Up at 24 hrs | A_65_P05749 | 1.18 | 0.034 NM_134134.1 | 2510002C16Rik          | hypothetical HMG1/2 (high mobility group) box containing protein  |
| Up at 24 hrs | A_65_P07460 | 1.18 | 0.027 XM_130308.1 | Lrp2                   | LOW DENSITY LIPOPROTEIN RECEPTOR                                  |
| Up at 24 hrs | A_65_P10783 | 1.18 | 0.014 BC021480.1  | 1110063F24Rik          | UNKNOWN                                                           |
| Up at 24 hrs | A_65_P12432 | 1.18 | 0.015 AK003211.1  | 1110001D15Rik          | hypothetical Integrin A (or I) domain structure containing protei |
| Up at 24 hrs | A_65_P02446 | 1.18 | 0.029 NM_172611.1 | 9930016O13             | Mus musculus hypothetical protein 9930016O13 (9930016O13), mRNA   |
| Up at 24 hrs | A_65_P02597 | 1.18 | 0.041             |                        | UNKNOWN                                                           |
| Up at 24 hrs | A_65_P04106 | 1.18 | 0.016 BC034833.1  |                        | Mus musculus, clone MGC:37830 IMAGE:5099225, mRNA, complete cds   |
| Up at 24 hrs | A_65_P02180 | 1.18 | 0.025 XM_130089.1 | Abl1                   | PROTO-ONCOGENE TYROSINE-PROTEIN KINASE ABL1 (EC 2.7.1.112) (P150) |
| Up at 24 hrs | A_65_P03520 | 1.18 | 0.047 NM_020003.1 | 0610031J06Rik          | Mus musculus RIKEN cDNA 0610031J06 gene (0610031J06Rik), mRNA     |
| Up at 24 hrs | A_65_P05262 | 1.18 | 0.048             |                        | UNKNOWN                                                           |
| Up at 24 hrs | A_65_P07452 | 1.18 | 0.037 XM_135073.2 | 2610101N10Rik          | hypothetical RNA-binding region RNP-1 (RNA recognition motif) con |
| Up at 24 hrs | A_65_P06991 | 1.17 | 0.038 NM_172396.1 | 9130011J15Rik          | Mus musculus RIKEN cDNA 9130011J15 gene (9130011J15Rik), mRNA     |
| Up at 24 hrs | A_65_P01357 | 1.17 | 0.015 XM_149041.2 |                        | Intronic in U021346                                               |
| Up at 24 hrs | A_65_P01684 | 1.17 | 0.021 Z54209.1    | Rps6                   | Intronic in U025233                                               |
| Up at 24 hrs | A_65_P08395 | 1.17 | 0.044 NM_011842.1 | Mta11                  | Mus musculus metastasis associated 1-like 1 (Mta11), mRNA         |
| Up at 24 hrs | A_65_P09518 | 1.17 | 0.037 BC027567.1  |                        | Similar to: Mus musculus, clone IMAGE:3472070, mRNA               |
| Up at 24 hrs | A_65_P03415 | 1.17 | 0.011 NM_025649.1 | 0610009D16Rik          | Mus musculus RIKEN cDNA 0610009D16 gene (0610009D16Rik), mRNA     |
| Up at 24 hrs | A_65_P01074 | 1.17 | 0.045 BC024613.1  | Pr1                    | Mus musculus, clone MGC:25884 IMAGE:4215775, mRNA, complete cds   |
| Up at 24 hrs | A_65_P08548 | 1.17 | 0.026 NM_011403.1 | Slc4a1                 | Mus musculus solute carrier family 4 (anion exchanger), member 1  |
| Up at 24 hrs | A_65_P09913 | 1.17 | 0.044             |                        | Intronic in U015982                                               |
| Up at 24 hrs | A_65_P01621 | 1.17 | 0.012 XM_032181.3 |                        | ADAMTS EC 3.4.24.- A DISINTEGRIN AND METALLOPROTEINASE WITH THROM |
| Up at 24 hrs | A_65_P04898 | 1.17 | 0.047 NM_008850.1 | Pitpn                  | Mus musculus phosphatidylinositol transfer protein (Pitpn), mRNA  |
| Up at 24 hrs | A_65_P06883 | 1.17 | 0.023 BC033274.1  | Trpc4ap                | transient receptor protein 4, associated protein                  |
| Up at 24 hrs | A_65_P00824 | 1.17 | 0.033             | 5530400K14Rik          | UNKNOWN                                                           |
| Up at 24 hrs | A_65_P02128 | 1.17 | 0.021             | D4ErtD117e             | UNKNOWN                                                           |
| Up at 24 hrs | A_65_P10551 | 1.17 | 0.015 U92882.1    | Tnnt1                  | Mus musculus slow skeletal muscle troponin T (Tnnt1) gene, comple |
| Up at 24 hrs | A_65_P09542 | 1.17 | 0.009 NM_009608.1 | Actc1                  | Mus musculus actin, alpha, cardiac (Actc1), mRNA                  |
| Up at 24 hrs | A_65_P12813 | 1.17 | 0.041             |                        | UNKNOWN                                                           |

|              |             |      |                   |               |                                                                             |
|--------------|-------------|------|-------------------|---------------|-----------------------------------------------------------------------------|
| Up at 24 hrs | A_65_P05050 | 1.17 | 0.013 XM_181395.1 | 1600027N09Rik | Mus musculus RIKEN cDNA 1600027N09 gene (1600027N09Rik), mRNA               |
| Up at 24 hrs | A_65_P10807 | 1.17 | 0.009             |               | UNKNOWN                                                                     |
| Up at 24 hrs | A_65_P02766 | 1.16 | 0.038 NM_011366.1 | Sh3d4         | Mus musculus SH3 domain protein 4 (Sh3d4), mRNA                             |
| Up at 24 hrs | A_65_P07429 | 1.16 | 0.045 XM_136101.1 |               | Mus musculus similar to beta actin [ <i>Sigmodon hispidus</i> ] (LOC207318) |
| Up at 24 hrs | A_65_P04571 | 1.16 | 0.033 AB029551.1  | YEAF1         | RING1 AND YY1 BINDING PROTEIN; RING1 INTERACTOR RYBP. [Source:Ref           |
| Up at 24 hrs | A_65_P03248 | 1.16 | 0.024             |               | UNKNOWN                                                                     |
| Up at 24 hrs | A_65_P01087 | 1.16 | 0.023 NM_008831.1 | Phb           | Mus musculus prohibitin (Phb), mRNA                                         |
| Up at 24 hrs | A_65_P02675 | 1.16 | 0.011 XM_123146.1 | Hsp84-1       | UNKNOWN                                                                     |
| Up at 24 hrs | A_65_P05153 | 1.16 | 0.011 NM_011756.2 | Zfp36         | Mus musculus zinc finger protein 36 (Zfp36), mRNA                           |
| Up at 24 hrs | A_65_P06037 | 1.16 | 0.015 XM_126821.2 | 1110057K04Rik | UNKNOWN                                                                     |
| Up at 24 hrs | A_65_P01655 | 1.16 | 0.047             |               | UNKNOWN                                                                     |
| Up at 24 hrs | A_65_P03060 | 1.16 | 0.029 BC031430.1  | Nubp1         | Mus musculus nucleotide binding protein 1 (Nubp1), mRNA                     |
| Up at 24 hrs | A_65_P07634 | 1.16 | 0.020 NM_026772.1 | Cdc42ep2      | Mus musculus CDC42 effector protein (Rho GTPase binding) 2 (Cdc42           |
| Up at 24 hrs | A_65_P08686 | 1.16 | 0.027             |               | UNKNOWN                                                                     |
| Up at 24 hrs | A_65_P15122 | 1.16 | 0.006 NM_146012.1 | D10ErtD73e    | Mus musculus expressed sequence A1586070 (A1586070), mRNA                   |
| Up at 24 hrs | A_65_P01992 | 1.16 | 0.017             |               | Intronic in U031513                                                         |
| Up at 24 hrs | A_65_P02962 | 1.16 | 0.046             | AU015644      | Intronic in U038898                                                         |
| Up at 24 hrs | A_65_P04389 | 1.15 | 0.010             |               | UNKNOWN                                                                     |
| Up at 24 hrs | A_65_P06011 | 1.15 | 0.041 NM_026618.1 | D11ErtD99e    | Mus musculus DNA segment, Chr 11, ERATO Doi 99, expressed (D11Ert           |
| Up at 24 hrs | A_65_P09309 | 1.15 | 0.040             |               | hypothetical ARM repeat structure containing protein                        |
| Up at 24 hrs | A_65_P13503 | 1.15 | 0.011 NM_172592.1 | 8430401B01    | RICH                                                                        |
| Up at 24 hrs | A_65_P01407 | 1.15 | 0.040 NM_023625.1 | 1300012G16Rik | Mus musculus RIKEN cDNA 1300012G16 gene (1300012G16Rik), mRNA               |
| Up at 24 hrs | A_65_P06989 | 1.15 | 0.035 U01023.1    | Gart          | Mus musculus phosphoribosylglycinamide formyltransferase (Gart),            |
| Up at 24 hrs | A_65_P20584 | 1.15 | 0.003 NM_172479.1 | E330031E14    | AMINO ACID TRANSPORTER SYSTEM N2 homolog [ <i>Rattus norvegicus</i> ]       |
| Up at 24 hrs | A_65_P03729 | 1.15 | 0.011             |               | UNKNOWN                                                                     |
| Up at 24 hrs | A_65_P05522 | 1.15 | 0.016 NM_026353.1 | 4930570C03Rik | Mus musculus RIKEN cDNA 4930570C03 gene (4930570C03Rik), mRNA               |
| Up at 24 hrs | A_65_P08214 | 1.15 | 0.018             |               | UNKNOWN                                                                     |
| Up at 24 hrs | A_65_P04559 | 1.15 | 0.024 NM_010563.1 | Ina           | Mus musculus internexin neuronal intermediate filament protein, a           |
| Up at 24 hrs | A_65_P03159 | 1.15 | 0.033 NM_025936.1 | 2610011N19Rik | Mus musculus RIKEN cDNA 2610011N19 gene (2610011N19Rik), mRNA               |
| Up at 24 hrs | A_65_P14135 | 1.15 | 0.032 NM_022417.1 | Itn3c         | Mus musculus integral membrane protein 3 (Itn3-pending), mRNA               |
| Up at 24 hrs | A_65_P04594 | 1.15 | 0.031             | Ubap2         | UNKNOWN                                                                     |
| Up at 24 hrs | A_65_P01497 | 1.15 | 0.014             |               | Intronic in U041048                                                         |
| Up at 24 hrs | A_65_P07364 | 1.15 | 0.044 NM_133836.1 | Il15ra        | Mus musculus interleukin 15 receptor, alpha chain (Il15ra), mRNA            |
| Up at 24 hrs | A_65_P02135 | 1.15 | 0.039             |               | Intronic in U032193                                                         |
| Up at 24 hrs | A_65_P02623 | 1.15 | 0.027             |               | UNKNOWN                                                                     |
| Up at 24 hrs | A_65_P08882 | 1.15 | 0.021 XM_146066.1 | AV235546      | Mus musculus SWAP complex protein, 70 kDa (Swap70), mRNA                    |
| Up at 24 hrs | A_65_P18065 | 1.15 | 0.004 BC004751.1  | Ubl5          | UNKNOWN                                                                     |
| Up at 24 hrs | A_65_P10093 | 1.14 | 0.049 M13874.1    | Trp53         | UNKNOWN                                                                     |
| Up at 24 hrs | A_65_P07744 | 1.14 | 0.018 NM_025781.1 | 9030409E16Rik | Mus musculus RIKEN cDNA 9030409E16 gene (9030409E16Rik), mRNA               |
| Up at 24 hrs | A_65_P11530 | 1.14 | 0.028 NM_015744.1 | Enpp2         | Mus musculus ectonucleotide pyrophosphatase/phosphodiesterase 2 (           |
| Up at 24 hrs | A_65_P10418 | 1.14 | 0.017             |               | REPEAT-SEQUENCE                                                             |
| Up at 24 hrs | A_65_P11733 | 1.14 | 0.042 NM_016885.1 | Emcn-pending  | Mus musculus endomucin (Emcn-pending), mRNA                                 |
| Up at 24 hrs | A_65_P05080 | 1.14 | 0.033             |               | Intronic in U021727                                                         |
| Up at 24 hrs | A_65_P08843 | 1.14 | 0.047 NM_153058.1 | Mapre2        | Mus musculus microtubule-associated protein, RP/EB family, member           |
| Up at 24 hrs | A_65_P01397 | 1.14 | 0.001 XM_177029.1 | Epb4.1        | ADULT MALE TONGUE CDNA, RIKEN FULL-LENGTH ENRICHED LIBRARY, CLONE           |
| Up at 24 hrs | A_65_P07047 | 1.14 | 0.042             |               | Intronic in U022163                                                         |
| Up at 24 hrs | A_65_P00728 | 1.14 | 0.000             | Braf          | Mus musculus Braf transforming gene (Braf), mRNA                            |
| Up at 24 hrs | A_65_P07722 | 1.14 | 0.031 NM_025815.1 | 1200003E11Rik | UNKNOWN                                                                     |
| Up at 24 hrs | A_65_P04543 | 1.14 | 0.024             |               | Intronic in U011315                                                         |
| Up at 24 hrs | A_65_P08025 | 1.14 | 0.014 XM_130156.2 |               | HYPOTHETICAL PROTEIN KIAA1094 homolog [ <i>Homo sapiens</i> ]               |
| Up at 24 hrs | A_65_P18084 | 1.14 | 0.005 NM_019913.1 | Txn2          | thioredoxin, mitochondrial                                                  |
| Up at 24 hrs | A_65_P14072 | 1.13 | 0.048 XM_122423.1 | 4833420E20Rik | Mus musculus RIKEN cDNA 4833420E20 gene (4833420E20Rik), mRNA               |
| Up at 24 hrs | A_65_P07171 | 1.13 | 0.038 AF461395.1  | Brd4          | Mus musculus bromodomain-containing 4 (Brd4), mRNA                          |
| Up at 24 hrs | A_65_P02877 | 1.13 | 0.033             | AW555464      | KARP 1 BINDING PROTEIN                                                      |
| Up at 24 hrs | A_65_P14563 | 1.13 | 0.048 NM_009942.1 | Cox5b         | UNKNOWN                                                                     |
| Up at 24 hrs | A_65_P00783 | 1.13 | 0.020 XM_036937.2 | Hic2          | DJ583P15 NOVEL ZINC FINGER PROTEIN                                          |
| Up at 24 hrs | A_65_P01853 | 1.13 | 0.011 XM_146719.1 | C77344        | UNKNOWN                                                                     |
| Up at 24 hrs | A_65_P03935 | 1.13 | 0.016             |               | UNKNOWN                                                                     |

|              |             |      |       |             |                                              |
|--------------|-------------|------|-------|-------------|----------------------------------------------|
| Up at 24 hrs | A_65_P11296 | 1.13 | 0.021 |             | UNKNOWN                                      |
| Up at 24 hrs | A_65_P03664 | 1.13 | 0.044 | XM_135094.1 | hypothetical protein FLJ20259 [Mus musculus] |
| Up at 24 hrs | A_65_P11519 | 1.13 | 0.043 |             | Intronic in U034270                          |
| Up at 24 hrs | A_65_P02741 | 1.13 | 0.010 | NM_138955.1 | Abcg4                                        |
| Up at 24 hrs | A_65_P01299 | 1.13 | 0.001 | NM_011942.1 | Lypla2                                       |
| Up at 24 hrs | A_65_P01693 | 1.13 | 0.020 | AB028209.1  | AW228608                                     |
| Up at 24 hrs | A_65_P08785 | 1.13 | 0.025 | NM_172135.1 | BC038058                                     |
| Up at 24 hrs | A_65_P19015 | 1.13 | 0.014 | XM_131963.1 | C77020                                       |
| Up at 24 hrs | A_65_P06523 | 1.13 | 0.033 | BC016635.1  | Ppap2c                                       |
| Up at 24 hrs | A_65_P11542 | 1.13 | 0.046 | NM_010068.1 | Dnmt3b                                       |
| Up at 24 hrs | A_65_P01032 | 1.13 | 0.039 | NM_138754.1 | D7Bwg0575e                                   |
| Up at 24 hrs | A_65_P02594 | 1.13 | 0.019 |             | D6Erd527e                                    |
| Up at 24 hrs | A_65_P08937 | 1.12 | 0.040 | XM_134537.1 | 9630020G22                                   |
| Up at 24 hrs | A_65_P03337 | 1.12 | 0.038 |             | D8Erd674e                                    |
| Up at 24 hrs | A_65_P07455 | 1.12 | 0.019 |             | UNKNOWN                                      |
| Up at 24 hrs | A_65_P08376 | 1.12 | 0.045 | AK053225.1  | AU019878                                     |
| Up at 24 hrs | A_65_P07189 | 1.12 | 0.017 | NM_133655.1 | Cd81                                         |
| Up at 24 hrs | A_65_P00619 | 1.12 | 0.043 | BC017597.1  | Socs4                                        |
| Up at 24 hrs | A_65_P04390 | 1.12 | 0.010 | NM_023331.1 | 3110052F15Rik                                |
| Up at 24 hrs | A_65_P04994 | 1.12 | 0.032 |             | AU022746                                     |
| Up at 24 hrs | A_65_P07454 | 1.12 | 0.050 | NM_010360.1 | Gstm5                                        |
| Up at 24 hrs | A_65_P06289 | 1.12 | 0.024 | NM_153152.1 | Qil1                                         |
| Up at 24 hrs | A_65_P07464 | 1.12 | 0.032 | XM_180041.1 | UNKNOWN                                      |
| Up at 24 hrs | A_65_P07533 | 1.11 | 0.031 | NM_133766.1 | C920006C10Rik                                |
| Up at 24 hrs | A_65_P01535 | 1.11 | 0.026 | NM_171826.1 | AW489850                                     |
| Up at 24 hrs | A_65_P02005 | 1.11 | 0.013 |             | Hs1bp3-pending                               |
| Up at 24 hrs | A_65_P01881 | 1.11 | 0.026 |             | Intronic in U032709                          |
| Up at 24 hrs | A_65_P08479 | 1.11 | 0.014 | XM_129334.2 | 9130011E15Rik                                |
| Up at 24 hrs | A_65_P14368 | 1.11 | 0.023 | AB002307.1  |                                              |
| Up at 24 hrs | A_65_P05661 | 1.11 | 0.036 | NM_023805.1 | Slc38a3                                      |
| Up at 24 hrs | A_65_P09253 | 1.11 | 0.036 |             | UNKNOWN                                      |
| Up at 24 hrs | A_65_P01231 | 1.11 | 0.049 |             | 1810028B20Rik                                |
| Up at 24 hrs | A_65_P01855 | 1.11 | 0.035 | XM_135103.2 | 8430421107Rik                                |
| Up at 24 hrs | A_65_P02754 | 1.11 | 0.005 |             | REPEAT-SEQUENCE                              |
| Up at 24 hrs | A_65_P00997 | 1.11 | 0.035 | NM_019675.1 | Stmn4                                        |
| Up at 24 hrs | A_65_P03666 | 1.11 | 0.008 | NM_026933.1 | 1810015M01Rik                                |
| Up at 24 hrs | A_65_P07478 | 1.11 | 0.021 | NM_009773.1 | Bub1b                                        |
| Up at 24 hrs | A_65_P07529 | 1.11 | 0.003 | NM_018784.1 | Siat10                                       |
| Up at 24 hrs | A_65_P00795 | 1.11 | 0.002 | XM_126504.2 | 2010015A21Rik                                |
| Up at 24 hrs | A_65_P09348 | 1.11 | 0.029 | NM_014847.1 | NICE-4                                       |
| Up at 24 hrs | A_65_P04044 | 1.11 | 0.030 |             | REPEAT-SEQUENCE                              |
| Up at 24 hrs | A_65_P05266 | 1.11 | 0.009 | NM_025494.1 | 1700025B18Rik                                |
| Up at 24 hrs | A_65_P08593 | 1.11 | 0.049 | NM_019929.1 | Smt3h1                                       |
| Up at 24 hrs | A_65_P12574 | 1.11 | 0.042 | NM_019552.1 | Abcb10                                       |
| Up at 24 hrs | A_65_P04021 | 1.10 | 0.035 | NM_172565.1 | BC011167                                     |
| Up at 24 hrs | A_65_P01440 | 1.10 | 0.014 | BC032976.1  | C86142                                       |
| Up at 24 hrs | A_65_P06949 | 1.10 | 0.023 | XM_128806.2 | AW494914                                     |
| Up at 24 hrs | A_65_P01165 | 1.10 | 0.007 | NM_026552.1 | Apc4                                         |
| Up at 24 hrs | A_65_P02769 | 1.10 | 0.021 |             | AU022583                                     |
| Up at 24 hrs | A_65_P04276 | 1.10 | 0.026 | NM_017475.1 | Gtr2                                         |
| Up at 24 hrs | A_65_P08772 | 1.10 | 0.043 | NM_008583.1 | Men1                                         |
| Up at 24 hrs | A_65_P01547 | 1.10 | 0.034 | NM_138950.1 | MGC32441                                     |
| Up at 24 hrs | A_65_P03059 | 1.10 | 0.048 |             | AI607462                                     |
| Up at 24 hrs | A_65_P09890 | 1.10 | 0.017 |             | Intronic in U035668                          |
| Up at 24 hrs | A_65_P16442 | 1.10 | 0.024 | XM_129443.1 | Ppfia4                                       |
| Up at 24 hrs | A_65_P01451 | 1.10 | 0.019 | BC038007.1  | UNKNOWN                                      |
| Up at 24 hrs | A_65_P03996 | 1.09 | 0.012 | BC028545.1  | 2610301115Rik                                |
| Up at 24 hrs | A_65_P16166 | 1.09 | 0.009 | AL832937.1  | D4Erd22e                                     |
|              |             |      |       |             | SIMILAR TO HYPOTHETICAL GENE SUPPORTED BY    |

|                |             |      |                   |               |                                                                    |
|----------------|-------------|------|-------------------|---------------|--------------------------------------------------------------------|
| Up at 24 hrs   | A_65_P06216 | 1.09 | 0.002             |               | Intronic in U005697                                                |
| Up at 24 hrs   | A_65_P08277 | 1.09 | 0.009 NM_028712.2 | Rap2b         | Mus musculus RAP2B, member of RAS oncogene family (Rap2b), mRNA    |
| Up at 24 hrs   | A_65_P00874 | 1.09 | 0.028 XM_127095.2 | LOC217831     | Mus musculus similar to KIAA1509 protein [Homo sapiens] (LOC21783) |
| Up at 24 hrs   | A_65_P04443 | 1.09 | 0.031 XM_128379.2 |               | SYNAPTOJANIN EC 3.1.3.56 SYNAPTIC INOSITOL 1,4,5 TRISPHOSPHATE 5   |
| Up at 24 hrs   | A_65_P07049 | 1.09 | 0.022 NM_022433.1 | Sirt3         | Mus musculus sirtuin 3 (silent mating type information regulation) |
| Up at 24 hrs   | A_65_P07277 | 1.09 | 0.020 NM_011125.1 | Pltp          | Mus musculus phospholipid transfer protein (Pltp), mRNA            |
| Up at 24 hrs   | A_65_P15687 | 1.09 | 0.009             |               | Intronic in U016151                                                |
| Up at 24 hrs   | A_65_P09130 | 1.09 | 0.048             | C77286        | Mus musculus U2 small nuclear ribonucleoprotein auxiliary factor   |
| Up at 24 hrs   | A_65_P04413 | 1.08 | 0.014 BC026635.1  | A1450346      | 2700078E11RIK PROTEIN                                              |
| Up at 24 hrs   | A_65_P06429 | 1.08 | 0.026             |               | UNKNOWN                                                            |
| Up at 24 hrs   | A_65_P04876 | 1.08 | 0.027 BC001996.1  | H2-DMa        | Mus musculus histocompatibility 2, class II, locus Dma (H2-DMa),   |
| Up at 24 hrs   | A_65_P05728 | 1.08 | 0.007 NM_019408.1 | Nfkb2         | Mus musculus nuclear factor of kappa light polypeptide gene enhan  |
| Up at 24 hrs   | A_65_P10962 | 1.08 | 0.003 NM_010015.1 | Dad1          | Mus musculus defender against cell death 1 (Dad1), mRNA            |
| Up at 24 hrs   | A_65_P01838 | 1.08 | 0.003 NM_008705.1 | Nme2          | Mus musculus expressed in non-metastatic cells 2, protein (NM23B)  |
| Up at 24 hrs   | A_65_P03322 | 1.08 | 0.048 NM_016800.1 | Vti1b         | Mus musculus vesicle transport through interaction with t-SNAREs   |
| Up at 24 hrs   | A_65_P07811 | 1.08 | 0.027 NM_028007.1 | 2310047C21Rik | Mus musculus RIKEN cDNA 2310047C21 gene (2310047C21Rik), mRNA      |
| Up at 24 hrs   | A_65_P01714 | 1.07 | 0.010             |               | UNKNOWN                                                            |
| Up at 24 hrs   | A_65_P12359 | 1.07 | 0.006 NM_023371.1 | Pin1          | Mus musculus similar to Peptidyl-prolyl cis-trans isomerase NIMA-  |
| Up at 24 hrs   | A_65_P01093 | 1.07 | 0.020             |               | UNKNOWN                                                            |
| Up at 24 hrs   | A_65_P02660 | 1.07 | 0.007 NM_144522.1 | 1110003P22Rik | Mus musculus RIKEN cDNA 1110003P22 gene (1110003P22Rik), mRNA      |
| Up at 24 hrs   | A_65_P10305 | 1.07 | 0.001             |               | UNKNOWN                                                            |
| Up at 24 hrs   | A_65_P00702 | 1.07 | 0.009 XM_129778.1 | 9430080K19Rik | UNKNOWN                                                            |
| Up at 24 hrs   | A_65_P15885 | 1.07 | 0.032 NM_172589.1 | 6030465B15    | hypothetical Aminotransferases class-II containing protein         |
| Up at 24 hrs   | A_65_P03334 | 1.07 | 0.018             |               | UNKNOWN                                                            |
| Up at 24 hrs   | A_65_P03124 | 1.07 | 0.008 XM_126678.1 | 3000004C01Rik | KINESIN SUPERFAMILY PROTEIN 18B (FRAGMENT).                        |
| Up at 24 hrs   | A_65_P03236 | 1.07 | 0.038             |               | Intronic in U030833                                                |
| Up at 24 hrs   | A_65_P03366 | 1.07 | 0.015 U69599.1    | Ifngr2        | Mus musculus interferon gamma receptor 2 (Ifngr2), mRNA            |
| Up at 24 hrs   | A_65_P17309 | 1.07 | 0.004 NM_172929.1 | C230069C04    | Similar to: Mus musculus hypothetical protein C230069C04 (C230069  |
| Up at 24 hrs   | A_65_P03959 | 1.07 | 0.014 NM_027539.1 | 6330415M09Rik | hypothetical Eukaryotic protein kinase/Doublecortin containing pr  |
| Up at 24 hrs   | A_65_P08679 | 1.07 | 0.033             | 2810028N01Rik | EXOSOME COMPLEX EXONUCLEASE RRP44 EC 3.1.13.- RIBOSOMAL RNA PROCE  |
| Up at 24 hrs   | A_65_P02665 | 1.06 | 0.007             | A1463667      | UNKNOWN                                                            |
| Up at 24 hrs   | A_65_P08521 | 1.06 | 0.013 XM_130271.2 | Ssrp1         | STRUCTURE-SPECIFIC RECOGNITION PROTEIN 1 (SSRP1) (RECOMBINATION S  |
| Up at 24 hrs   | A_65_P08489 | 1.06 | 0.039 BC003980.1  | AW536184      | Mus musculus protein tyrosine phosphatase, non-receptor type 11 (  |
| Up at 24 hrs   | A_65_P13751 | 1.05 | 0.034 NM_025861.1 | 2310009N05Rik | Mus musculus RIKEN cDNA 2310009N05 gene (2310009N05Rik), mRNA      |
| Up at 24 hrs   | A_65_P02972 | 1.05 | 0.003             |               | Intronic in U013098                                                |
| Up at 24 hrs   | A_65_P08581 | 1.05 | 0.019 NM_007462.1 | Apc           | Mus musculus adenomatosis polyposis coli (Apc), mRNA               |
| Up at 24 hrs   | A_65_P17025 | 1.04 | 0.018             |               | UNKNOWN                                                            |
| Up at 24 hrs   | A_65_P12897 | 1.04 | 0.025 NM_134159.1 | Il17rl        | Mus musculus interleukin 17 receptor-like (Il17rl), mRNA           |
| Up at 24 hrs   | A_65_P08218 | 1.04 | 0.024             |               | UNKNOWN                                                            |
| Up at 24 hrs   | A_65_P09139 | 1.03 | 0.019             | 2310076D10Rik | SIMILAR TO DUAL SPECIFICITY PHOSPHATASE 9. [Source:SPTREMBL;Acc:Q  |
| Up at 24 hrs   | A_65_P08979 | 1.01 | 0.024             |               | Intronic in U032217                                                |
| Down at 24 hrs | A_65_P14297 | 0.99 | 0.011             |               | UNKNOWN                                                            |
| Down at 24 hrs | A_65_P10769 | 0.99 | 0.001             |               | Intronic in U033164                                                |
| Down at 24 hrs | A_65_P14459 | 0.98 | 0.012 XM_129808.2 | 2010300C02Rik | Mus musculus RIKEN cDNA 2010300C02 gene (2010300C02Rik), mRNA      |
| Down at 24 hrs | A_65_P11671 | 0.97 | 0.028 NM_010739.1 | Ly64          | Mus musculus lymphocyte antigen 64 (Ly64), mRNA                    |
| Down at 24 hrs | A_65_P02151 | 0.97 | 0.038 NM_146171.1 | 2810406C15Rik | Mus musculus RIKEN cDNA 2810406C15 gene (2810406C15Rik), mRNA      |
| Down at 24 hrs | A_65_P08409 | 0.97 | 0.005 NM_026388.1 | 1200015A19Rik | Mus musculus RIKEN cDNA 1200015A19 gene (1200015A19Rik), mRNA      |
| Down at 24 hrs | A_65_P10765 | 0.96 | 0.022             |               | UNKNOWN                                                            |
| Down at 24 hrs | A_65_P11723 | 0.96 | 0.011 NM_009208.1 | Slc4a3        | Mus musculus solute carrier family 4 (anion exchanger), member 3   |
| Down at 24 hrs | A_65_P15471 | 0.96 | 0.031 NM_007458.1 | Ap2a1         | Mus musculus adaptor protein complex AP-2, alpha 1 subunit (Ap2a1  |
| Down at 24 hrs | A_65_P15857 | 0.96 | 0.050             |               | Intronic in U016775                                                |
| Down at 24 hrs | A_65_P17757 | 0.96 | 0.045 NM_013692.1 | Tieg          | UNKNOWN                                                            |
| Down at 24 hrs | A_65_P19372 | 0.95 | 0.043             | Tlk2          | Mus musculus tousled-like kinase 2 (Arabidopsis) (Tlk2), mRNA      |
| Down at 24 hrs | A_65_P17361 | 0.95 | 0.034 NM_133952.1 | AW538196      | Mus musculus expressed sequence AW538196 (AW538196), mRNA          |
| Down at 24 hrs | A_65_P18804 | 0.95 | 0.007             | Entpd5        | Mus musculus ectonucleoside triphosphate diphosphohydrolase 5 (En  |
| Down at 24 hrs | A_65_P05965 | 0.95 | 0.033 BC029079.1  | 1700009P03Rik | RIKEN cDNA 1700009P03 gene                                         |
| Down at 24 hrs | A_65_P06183 | 0.95 | 0.045 NM_054082.1 | Mta3          | Mus musculus metastasis associated 3 (Mta3), mRNA                  |
| Down at 24 hrs | A_65_P13352 | 0.95 | 0.045 NM_011678.1 | Usp4          | Mus musculus ubiquitin specific protease 4 (proto-oncogene) (Usp4  |

|                |             |      |                   |               |                                                                   |
|----------------|-------------|------|-------------------|---------------|-------------------------------------------------------------------|
| Down at 24 hrs | A_65_P08879 | 0.95 | 0.049             |               | UNKNOWN                                                           |
| Down at 24 hrs | A_65_P09537 | 0.95 | 0.015 XM_134245.2 |               | Mus musculus LOC234385 (LOC234385), mRNA                          |
| Down at 24 hrs | A_65_P10913 | 0.95 | 0.011 NM_009367.1 | Tgfb2         | Mus musculus transforming growth factor, beta 2 (Tgfb2), mRNA     |
| Down at 24 hrs | A_65_P13263 | 0.95 | 0.028 AP005020.1  |               | Intronic in U010441                                               |
| Down at 24 hrs | A_65_P13576 | 0.95 | 0.019             | LOC230866     | Mus musculus KIAA0090 protein-like (LOC230866), mRNA              |
| Down at 24 hrs | A_65_P12234 | 0.95 | 0.035             | Pigb          | Cross Reactive                                                    |
| Down at 24 hrs | A_65_P17567 | 0.95 | 0.033 NM_009045.1 | Rela          | Mus musculus v-rel reticuloendotheliosis viral oncogene homolog A |
| Down at 24 hrs | A_65_P02735 | 0.94 | 0.037 NM_013726.1 | Ask-pending   | Mus musculus activator of S phase kinase (Ask-pending), mRNA      |
| Down at 24 hrs | A_65_P19894 | 0.94 | 0.003 NM_025521.1 | 2310011J03Rik | Mus musculus RIKEN cDNA 2310011J03 gene (2310011J03Rik), mRNA     |
| Down at 24 hrs | A_65_P17418 | 0.94 | 0.001 M95495.1    | Sic6a6        | Similar to: Mus musculus sodium-dependent taurine transporter (Sl |
| Down at 24 hrs | A_65_P19977 | 0.94 | 0.023 XM_180133.1 | Mpg           | CGTHBA PROTEIN 14 GENE                                            |
| Down at 24 hrs | A_65_P12868 | 0.94 | 0.010 NM_011075.1 | Abcb1b        | Mus musculus ATP-binding cassette, sub-family B (MDR/TAP), member |
| Down at 24 hrs | A_65_P12877 | 0.94 | 0.014 AB038696.1  | Olig1         | Mus musculus oligodendrocyte transcription factor 1 (Olig1), mRNA |
| Down at 24 hrs | A_65_P15603 | 0.94 | 0.014 NM_025862.1 | 2310016C19Rik | Mus musculus RIKEN cDNA 2310016C19 gene (2310016C19Rik), mRNA     |
| Down at 24 hrs | A_65_P17493 | 0.94 | 0.006 XM_126316.2 | Tom1l2        | Mus musculus target of myb1-like 2 (Tom1l2), mRNA                 |
| Down at 24 hrs | A_65_P06800 | 0.94 | 0.046             | AA407980      | toll-interleukin 1 receptor (TIR) domain-containing adaptor prote |
| Down at 24 hrs | A_65_P15644 | 0.93 | 0.028 XM_127045.1 | Sec23a        | UNKNOWN                                                           |
| Down at 24 hrs | A_65_P12220 | 0.93 | 0.041 XM_145957.2 | 9530039D02Rik | UVRAG (FRAGMENT). [Source:SPTREMBL;Acc:Q9QYL9]                    |
| Down at 24 hrs | A_65_P12093 | 0.93 | 0.022 NM_026574.1 | 4632409L19Rik | Mus musculus RIKEN cDNA 4632409L19 gene (4632409L19Rik), mRNA     |
| Down at 24 hrs | A_65_P14595 | 0.93 | 0.034 XM_126538.2 | 2310057L06Rik | similar to TUBULIN-SPECIFIC CHAPERONE D [Homo sapiens]            |
| Down at 24 hrs | A_65_P18355 | 0.93 | 0.034             | 2510001A17Rik | RAN BINDING PROTEIN                                               |
| Down at 24 hrs | A_65_P05966 | 0.93 | 0.031 NM_009687.1 | Apex1         | Mus musculus apurinic/apyrimidinic endonuclease 1 (Apex1), mRNA   |
| Down at 24 hrs | A_65_P10595 | 0.93 | 0.049             | C85382        | Intronic in U002203                                               |
| Down at 24 hrs | A_65_P14616 | 0.93 | 0.002             |               | UNKNOWN                                                           |
| Down at 24 hrs | A_65_P15349 | 0.93 | 0.022 NM_138753.1 | Clp1-pending  | Mus musculus cardiac lineage protein 1 (Clp1-pending), mRNA       |
| Down at 24 hrs | A_65_P12743 | 0.93 | 0.042 NM_139302.1 | SH3GLB2       | UNKNOWN                                                           |
| Down at 24 hrs | A_65_P13188 | 0.93 | 0.034 XM_127497.2 | 1190005P08Rik | UNKNOWN                                                           |
| Down at 24 hrs | A_65_P13473 | 0.93 | 0.014             |               | UNKNOWN                                                           |
| Down at 24 hrs | A_65_P15162 | 0.93 | 0.004 BC029988.1  | Lbh-pending   | Mus musculus limb-bud and heart (Lbh-pending), mRNA               |
| Down at 24 hrs | A_65_P11462 | 0.93 | 0.033 NM_172560.1 | 9830165K03    | similar to PP1221 [Homo sapiens]                                  |
| Down at 24 hrs | A_65_P13234 | 0.93 | 0.050 NM_010466.1 | Hoxc8         | Mus musculus homeo box C8 (Hoxc8), mRNA                           |
| Down at 24 hrs | A_65_P20274 | 0.92 | 0.040             | C030026E19Rik | UNKNOWN                                                           |
| Down at 24 hrs | A_65_P10146 | 0.92 | 0.048 NM_029386.1 | 2310066E14Rik | Mus musculus RIKEN cDNA 2310066E14 gene (2310066E14Rik), mRNA     |
| Down at 24 hrs | A_65_P14700 | 0.92 | 0.026 XM_130308.1 | Lrp2          | LOW DENSITY LIPOPROTEIN RECEPTOR                                  |
| Down at 24 hrs | A_65_P19278 | 0.92 | 0.010 XM_130456.1 | MGC36479      | VACUOLAR PROTEIN SORTING PROTEIN                                  |
| Down at 24 hrs | A_65_P02313 | 0.92 | 0.012 XM_126166.1 | Hint          | HISTIDINE TRIAD NUCLEOTIDE-BINDING PROTEIN (PROTEIN KINASE C INHI |
| Down at 24 hrs | A_65_P18565 | 0.92 | 0.018 BC004654.1  | Rfx2          | Mus musculus vregulatory factor X, 2 (influences HLA class II exp |
| Down at 24 hrs | A_65_P07619 | 0.92 | 0.042 XM_129854.2 | A1448372      | UDP GLUCOSE                                                       |
| Down at 24 hrs | A_65_P11413 | 0.92 | 0.015 NM_020619.1 | Gcs1          | Mus musculus glucosidase 1 (Gcs1), mRNA                           |
| Down at 24 hrs | A_65_P09462 | 0.92 | 0.023             |               | Intronic in U001728                                               |
| Down at 24 hrs | A_65_P11820 | 0.92 | 0.007             |               | UNKNOWN                                                           |
| Down at 24 hrs | A_65_P15648 | 0.92 | 0.012 BC029184.1  | 2310012I02Rik | Mus musculus Sloan-Kettering viral oncogene homolog (Ski), mRNA   |
| Down at 24 hrs | A_65_P06959 | 0.92 | 0.009 XM_129773.2 | Arcp2         | ARP2/3 COMPLEX 34 KDA SUBUNIT P34 ARC ACTIN RELATED PROTEIN 2/3 C |
| Down at 24 hrs | A_65_P09031 | 0.92 | 0.007 BC034079.1  | 2810404F18Rik | NON KINASE CDC42 EFFECTOR PROTEIN                                 |
| Down at 24 hrs | A_65_P15224 | 0.92 | 0.001 XM_132501.1 | LOC231887     | 28 KDA HEAT AND ACID STABLE PHOSPHOPROTEIN PDGF ASSOCIATED        |
| Down at 24 hrs | A_65_P07997 | 0.92 | 0.007 NM_011862.1 | Paccin2       | Mus musculus protein kinase C and casein kinase substrate in neur |
| Down at 24 hrs | A_65_P15259 | 0.91 | 0.023             |               | UNKNOWN                                                           |
| Down at 24 hrs | A_65_P17403 | 0.91 | 0.013             |               | UNKNOWN                                                           |
| Down at 24 hrs | A_65_P12135 | 0.91 | 0.014             | C80425        | Intronic in U023527                                               |
| Down at 24 hrs | A_65_P13178 | 0.91 | 0.030 NM_009272.1 | Srm           | Mus musculus spermidine synthase (Srm), mRNA                      |
| Down at 24 hrs | A_65_P09255 | 0.91 | 0.007 XM_128500.3 | Ppard         | PEROXISOME PROLIFERATOR ACTIVATED RECEPTOR BETA (PPAR-BETA) (PPAR |
| Down at 24 hrs | A_65_P17029 | 0.91 | 0.031 NM_011886.1 | Scamp3        | Mus musculus secretory carrier membrane protein 3 (Scamp3), mRNA  |
| Down at 24 hrs | A_65_P13151 | 0.91 | 0.006 NM_172257.1 | LOC214597     | SIMILAR TO HYPOTHETICAL PROTEIN FLJ20174 (FRAGMENT). [Source:SPTR |
| Down at 24 hrs | A_65_P15593 | 0.91 | 0.038             | D5Buc26e      | UNKNOWN                                                           |
| Down at 24 hrs | A_65_P15815 | 0.91 | 0.001 NM_008348.1 | Il10ra        | Mus musculus interleukin 10 receptor, alpha (Il10ra), mRNA        |
| Down at 24 hrs | A_65_P15870 | 0.91 | 0.013 U45977.1    | Sdf4          | UNKNOWN                                                           |
| Down at 24 hrs | A_65_P15101 | 0.91 | 0.029 XM_126532.2 | 4933437E18Rik | OXYSTEROL BINDING PROTEIN RELATED PROTEIN OSBP RELATED PROTEIN OR |
| Down at 24 hrs | A_65_P17941 | 0.91 | 0.009 NM_031874.3 | Rab3d         | Mus musculus RAB3D, member RAS oncogene family (Rab3d), mRNA      |

|                |             |      |                   |                    |                                                                   |
|----------------|-------------|------|-------------------|--------------------|-------------------------------------------------------------------|
| Down at 24 hrs | A_65_P12362 | 0.91 | 0.043             |                    | UNKNOWN                                                           |
| Down at 24 hrs | A_65_P12456 | 0.91 | 0.037 BC029636.1  | Ephx1              | Mus musculus epoxide hydrolase 1, microsomal (Ephx1), mRNA        |
| Down at 24 hrs | A_65_P16809 | 0.91 | 0.021 XM_133852.2 | Rab6ip1            | HYPOTHETICAL 144.1 KDA PROTEIN (FRAGMENT). [Source:SPTREMBL;Acc:Q |
| Down at 24 hrs | A_65_P17882 | 0.91 | 0.027 NM_007829.1 | Daxx               | Mus musculus Fas death domain-associated protein (Daxx), mRNA     |
| Down at 24 hrs | A_65_P11350 | 0.90 | 0.047 NM_030215.1 | Wrnip              | Mus musculus Werner syndrome homolog (human) interacting protein  |
| Down at 24 hrs | A_65_P13717 | 0.90 | 0.027             |                    | similar to DJ12208.2 (NOVEL PROTEIN) (HYPOTHETICAL 10.4 KDA PROTE |
| Down at 24 hrs | A_65_P16754 | 0.90 | 0.027 NM_146032.1 | MGC38208           | Mus musculus hypothetical protein MGC38208 (MGC38208), mRNA       |
| Down at 24 hrs | A_65_P16273 | 0.90 | 0.039 XM_148007.2 | Abcf3              | ATP BINDING CASSETTE, SUB FAMILY F, MEMBER 2 IRON INHIBITED ABC T |
| Down at 24 hrs | A_65_P14855 | 0.90 | 0.045 NM_010016.1 | Daf1               | Mus musculus decay accelerating factor 1 (Daf1), mRNA             |
| Down at 24 hrs | A_65_P01461 | 0.90 | 0.026             | Fbxl5              | F BOX PROTEIN                                                     |
| Down at 24 hrs | A_65_P12271 | 0.90 | 0.018             | Ppp3ca             | SERINE/THREONINE PROTEIN PHOSPHATASE 2B CATALYTIC SUBUNIT, ALPHA  |
| Down at 24 hrs | A_65_P13910 | 0.90 | 0.048 BC013510.1  | 1810011O01Rik      | Mus musculus RIKEN cDNA 1810011O01 gene (1810011O01Rik), mRNA     |
| Down at 24 hrs | A_65_P14697 | 0.90 | 0.046 XM_147952.2 | Slc4a8             | Mus musculus solute carrier family 4 (anion exchanger), member 8  |
| Down at 24 hrs | A_65_P18284 | 0.90 | 0.003 BC002321.1  | 1500016M21Rik      | Mus musculus RIKEN cDNA 1500016M21 gene (1500016M21Rik), mRNA     |
| Down at 24 hrs | A_65_P06941 | 0.90 | 0.009 NM_172574.1 | E030024M05         | Mus musculus hypothetical protein E030024M05 (E030024M05), mRNA   |
| Down at 24 hrs | A_65_P10620 | 0.90 | 0.041 NM_007479.1 | Arf4               | Mus musculus ADP-ribosylation factor 4 (Arf4), mRNA               |
| Down at 24 hrs | A_65_P12435 | 0.90 | 0.033 NM_134155.1 | Brms1-pending      | Mus musculus breast cancer metastasis-suppressor 1 (Brms1-pending |
| Down at 24 hrs | A_65_P14511 | 0.90 | 0.019 NM_019424.1 | Hps1               | Mus musculus Hermansky-Pudlak syndrome 1 homolog (human) (Hps1),  |
| Down at 24 hrs | A_65_P14776 | 0.89 | 0.011 BC034008.1  | Oas2               | Similar to: Homo sapiens, clone IMAGE:5092694, mRNA               |
| Down at 24 hrs | A_65_P15790 | 0.89 | 0.042 NM_031740.1 | B4galt6            | Intronic in U020403                                               |
| Down at 24 hrs | A_65_P06688 | 0.89 | 0.027 NM_022009.1 | Fliih              | Mus musculus flightless I homolog (Drosophila) (Fliih), mRNA      |
| Down at 24 hrs | A_65_P19972 | 0.89 | 0.047 U62907.1    | Zfp95              | ZINC FINGER PROTEIN 95 (ZFP-95). [Source:SWISSPROT;Acc:Q9Z1D8]    |
| Down at 24 hrs | A_65_P10630 | 0.89 | 0.009 NM_022994.1 | Dap3               | Mus musculus death associated protein 3 (Dap3), mRNA              |
| Down at 24 hrs | A_65_P12304 | 0.89 | 0.026             |                    | Intronic in U042684                                               |
| Down at 24 hrs | A_65_P15718 | 0.89 | 0.047 NM_021329.1 | Rangnrf-pending    | Mus musculus RAN guanine nucleotide release factor (Rangnrf-pendi |
| Down at 24 hrs | A_65_P04465 | 0.89 | 0.003 XM_126280.2 | 1110032A10Rik;TEF3 | unnamed protein product {Homo sapiens}                            |
| Down at 24 hrs | A_65_P18856 | 0.89 | 0.015 NM_018772.1 | Bri3               | Mus musculus brain protein I3 (Bri3), mRNA                        |
| Down at 24 hrs | A_65_P12117 | 0.89 | 0.023 AF201285.1  | Tgfb1i4            | Mus musculus transforming growth factor beta 1 induced transcript |
| Down at 24 hrs | A_65_P13203 | 0.89 | 0.030             |                    | UNKNOWN                                                           |
| Down at 24 hrs | A_65_P11453 | 0.89 | 0.021 BC010580.1  | Trim21             | Similar to: Mus musculus, Sjogren syndrome antigen A1, clone MGC: |
| Down at 24 hrs | A_65_P08315 | 0.89 | 0.050 XM_134442.1 |                    | similar to PYRUVATE DEHYDROGENASE PHOSPHATASE REGULATORY SUBUNIT  |
| Down at 24 hrs | A_65_P20194 | 0.88 | 0.022 XM_134540.2 | Ddx38              | PRE MRNA SPLICING FACTOR RNA HELICASE DEAH BOX PROTEIN            |
| Down at 24 hrs | A_65_P12311 | 0.88 | 0.034 NM_016671.1 | Tccr               | UNKNOWN                                                           |
| Down at 24 hrs | A_65_P19243 | 0.88 | 0.018 XM_128055.1 | Hsf1               | HEAT SHOCK FACTOR PROTEIN 1 (HSF 1) (HEAT SHOCK TRANSCRIPTION FAC |
| Down at 24 hrs | A_65_P09710 | 0.88 | 0.050             |                    | UNKNOWN                                                           |
| Down at 24 hrs | A_65_P14023 | 0.88 | 0.014 XM_132435.2 | 2610019P18Rik      | weakly similar to GM14561P [Drosophila melanogaster]              |
| Down at 24 hrs | A_65_P13562 | 0.88 | 0.021             | C78334             | UNKNOWN                                                           |
| Down at 24 hrs | A_65_P16012 | 0.88 | 0.036 XM_162478.1 |                    | UNKNOWN                                                           |
| Down at 24 hrs | A_65_P12375 | 0.87 | 0.045 XM_135990.1 | Pin4               | UNKNOWN                                                           |
| Down at 24 hrs | A_65_P08552 | 0.87 | 0.020 NM_016852.1 | Wbp2               | Mus musculus WW domain binding protein 2 (Wbp2), mRNA             |
| Down at 24 hrs | A_65_P11466 | 0.87 | 0.046 NM_023247.1 | 4733401H18Rik      | Mus musculus RIKEN cDNA 4733401H18 gene (4733401H18Rik), mRNA     |
| Down at 24 hrs | A_65_P11859 | 0.87 | 0.016 BC004599.1  | Tnfrsf1a           | Mus musculus tumor necrosis factor receptor superfamily, member 1 |
| Down at 24 hrs | A_65_P15710 | 0.87 | 0.031 NM_024220.1 | 1810004I06Rik      | Mus musculus RIKEN cDNA 1810004I06 gene (1810004I06Rik), mRNA     |
| Down at 24 hrs | A_65_P11907 | 0.87 | 0.030             |                    | Intronic in U016534                                               |
| Down at 24 hrs | A_65_P10352 | 0.87 | 0.006             |                    | UNKNOWN                                                           |
| Down at 24 hrs | A_65_P13276 | 0.87 | 0.028 XM_124127.1 |                    | UNKNOWN                                                           |
| Down at 24 hrs | A_65_P06116 | 0.87 | 0.047 XM_109348.1 |                    | similar to FIBRILLARIN (NUCLEOLAR PROTEIN 1) [Mus musculus]       |
| Down at 24 hrs | A_65_P13133 | 0.87 | 0.005             |                    | Intronic in U035009                                               |
| Down at 24 hrs | A_65_P15884 | 0.87 | 0.036 NM_144862.1 | MGC19129           | Mus musculus hypothetical protein MGC19129 (MGC19129), mRNA       |
| Down at 24 hrs | A_65_P17788 | 0.87 | 0.019 XM_125922.2 | 2310042E05Rik      | SIMILAR TO DYNACTIN 2 (P50). [Source:SPTREMBL;Acc:Q99KJ8]         |
| Down at 24 hrs | A_65_P11360 | 0.87 | 0.028 NM_020002.1 | Rec8-pending       | Mus musculus meiotic cohesion Rec8 (Rec8-pending), mRNA           |
| Down at 24 hrs | A_65_P11766 | 0.87 | 0.002 NM_145948.1 | MGC38232           | Mus musculus hypothetical protein MGC38232 (MGC38232), mRNA       |
| Down at 24 hrs | A_65_P14348 | 0.87 | 0.028 NM_139093.1 | LOC245925          | Mus musculus expressed sequence AA673488 (AA673488), mRNA         |
| Down at 24 hrs | A_65_P17599 | 0.87 | 0.027 NM_019981.1 | Tex101             | Mus musculus testis expressed gene 101 (Tex101), mRNA             |
| Down at 24 hrs | A_65_P18141 | 0.87 | 0.011 BC025865.1  |                    | weakly similar to LD39545P [Drosophila melanogaster]              |
| Down at 24 hrs | A_65_P18219 | 0.87 | 0.025             |                    | UNKNOWN                                                           |
| Down at 24 hrs | A_65_P08588 | 0.87 | 0.015             |                    | UNKNOWN                                                           |
| Down at 24 hrs | A_65_P09616 | 0.87 | 0.020 XM_126304.2 | AB030190           | hypothetical protein, clone 2-24                                  |



|                |             |      |                   |               |                                                                   |
|----------------|-------------|------|-------------------|---------------|-------------------------------------------------------------------|
| Down at 24 hrs | A_65_P05858 | 0.87 | 0.049             |               | Intronic in U021900                                               |
| Down at 24 hrs | A_65_P11085 | 0.87 | 0.030 NM_172649.1 | AW743433      | similar to RAB3-GAP REGULATORY DOMAIN [Homo sapiens]              |
| Down at 24 hrs | A_65_P16225 | 0.87 | 0.008 XM_122471.1 | Traf3         | Mus musculus Tnf receptor-associated factor 3 (Traf3), mRNA       |
| Down at 24 hrs | A_65_P16952 | 0.87 | 0.033 BC003837.1  | Ywhaq         | Mus musculus tyrosine 3-monooxygenase/tryptophan 5-monooxygenase  |
| Down at 24 hrs | A_65_P17699 | 0.86 | 0.000 NM_152804.1 | Snk           | Mus musculus serum-inducible kinase (Snk), mRNA                   |
| Down at 24 hrs | A_65_P15978 | 0.86 | 0.045 AK005700.1  | 2310061K06Rik | Mus musculus RIKEN cDNA 2310061K06 gene (2310061K06Rik), mRNA     |
| Down at 24 hrs | A_65_P07451 | 0.86 | 0.033 NM_026455.1 | 2510049I19Rik | Mus musculus RIKEN cDNA 2510049I19 gene (2510049I19Rik), mRNA     |
| Down at 24 hrs | A_65_P08144 | 0.86 | 0.016 NM_007952.1 | Grp58         | Mus musculus glucose regulated protein, 58 kDa (Grp58), mRNA      |
| Down at 24 hrs | A_65_P09298 | 0.86 | 0.017 NM_009032.1 | Rbm4          | Mus musculus RNA binding motif protein 14 (Rbm14), mRNA           |
| Down at 24 hrs | A_65_P05493 | 0.86 | 0.036 NM_009096.1 | Rps6          | UNKNOWN                                                           |
| Down at 24 hrs | A_65_P11415 | 0.86 | 0.028 NM_009030.1 | Rbbp4         | Mus musculus retinoblastoma binding protein 4 (Rbbp4), mRNA       |
| Down at 24 hrs | A_65_P16463 | 0.86 | 0.009             | Hdac7a        | Mus musculus histone deacetylase 7A (Hdac7a), mRNA                |
| Down at 24 hrs | A_65_P18984 | 0.86 | 0.026 U47487.1    |               | Mus musculus domesticus mitochondrial DNA type 59 control region  |
| Down at 24 hrs | A_65_P05477 | 0.86 | 0.023 NM_023040.1 | Gfer          | Mus musculus growth factor, erv1 (S. cerevisiae)-like (augmenter  |
| Down at 24 hrs | A_65_P13959 | 0.86 | 0.010             | Csda          | Similar to: Mus musculus cold shock domain protein A (Csda), mRNA |
| Down at 24 hrs | A_65_P14724 | 0.86 | 0.012             | 6030440P17Rik | CDNA FIS, CLONE, WEAKLY SIMILAR TO LYTECHINUS VARIEGATUS EMBRYON  |
| Down at 24 hrs | A_65_P13867 | 0.86 | 0.032 BC002320.1  | 2700099C18Rik | UNKNOWN                                                           |
| Down at 24 hrs | A_65_P13901 | 0.86 | 0.041 XM_135441.2 | 5830417I10Rik | Mus musculus RIKEN cDNA 5830417I10 gene (5830417I10Rik), mRNA     |
| Down at 24 hrs | A_65_P17368 | 0.86 | 0.024             |               | UNKNOWN                                                           |
| Down at 24 hrs | A_65_P14052 | 0.86 | 0.017 XM_176910.1 | 2310050N11Rik | PUTATIVE ALPHA MANNOSIDASE EC 3.2.-.-                             |
| Down at 24 hrs | A_65_P16688 | 0.86 | 0.021 NM_022702.1 |               | Intronic in U029266                                               |
| Down at 24 hrs | A_65_P10436 | 0.86 | 0.028 XM_130737.1 | Stk6          | SERINE/THREONINE KINASE 6 (SERINE/THREONINE KINASE AYK1). [Source |
| Down at 24 hrs | A_65_P15010 | 0.85 | 0.037             |               | UNKNOWN                                                           |
| Down at 24 hrs | A_65_P08162 | 0.85 | 0.011             | AW214631      | Mus musculus iduronate 2-sulfatase (Ids), mRNA                    |
| Down at 24 hrs | A_65_P15936 | 0.85 | 0.020 NM_016860.1 | Actr1a        | Mus musculus actin-related protein 1 homolog A (yeast) (Actr1a),  |
| Down at 24 hrs | A_65_P17661 | 0.85 | 0.030             |               | UNKNOWN                                                           |
| Down at 24 hrs | A_65_P03885 | 0.85 | 0.035 NM_009915.1 | Ccr2          | chemokine (C-C) receptor 2                                        |
| Down at 24 hrs | A_65_P10658 | 0.85 | 0.005 AK014742.1  | Lss           | Mus musculus lanosterol synthase (Lss), mRNA                      |
| Down at 24 hrs | A_65_P00608 | 0.85 | 0.026 BC006063.1  | 1700029B21Rik | Mus musculus, Similar to hypothetical protein FLJ12610, clone MGC |
| Down at 24 hrs | A_65_P11823 | 0.85 | 0.040 XM_132020.2 | 0610039G24Rik | RIKEN CDNA G24                                                    |
| Down at 24 hrs | A_65_P13785 | 0.85 | 0.029 NM_009150.2 | Selenbp1      | Similar to: Mus musculus selenium binding protein 1 (Selenbp1), m |
| Down at 24 hrs | A_65_P17264 | 0.85 | 0.025 NM_144805.1 | W64236        | Mus musculus EST W64236 (W64236), mRNA                            |
| Down at 24 hrs | A_65_P18487 | 0.85 | 0.028             |               | UNKNOWN                                                           |
| Down at 24 hrs | A_65_P13425 | 0.85 | 0.046             | AU014795      | UNKNOWN                                                           |
| Down at 24 hrs | A_65_P08829 | 0.85 | 0.024 XM_176844.1 | Tagln3        | Mus musculus transgelin 3 (Tagln3), mRNA                          |
| Down at 24 hrs | A_65_P10548 | 0.85 | 0.001 BC012679.1  | Mrps12        | Mus musculus mitochondrial ribosomal protein S12 (Mrps12), mRNA   |
| Down at 24 hrs | A_65_P16327 | 0.85 | 0.020 BC021534.1  | Xpnpep1       | Mus musculus X-prolyl aminopeptidase (aminopeptidase P) 1, solubl |
| Down at 24 hrs | A_65_P11881 | 0.84 | 0.039 NM_172748.1 | 6030430O11    | F BOX PROTEIN                                                     |
| Down at 24 hrs | A_65_P09374 | 0.84 | 0.024             |               | weakly similar to ALANINE:GLYOXYLATE AMINOTRANSFERASE 2 HOMOLOG 1 |
| Down at 24 hrs | A_65_P09761 | 0.84 | 0.044 XM_138976.1 | E230015L20Rik | Similar to: Mus musculus RIKEN cDNA E230015L20 gene (E230015L20Ri |
| Down at 24 hrs | A_65_P15550 | 0.84 | 0.035             |               | Intronic in U011655                                               |
| Down at 24 hrs | A_65_P15661 | 0.84 | 0.003             |               | Intronic in U009770                                               |
| Down at 24 hrs | A_65_P13779 | 0.84 | 0.002 NM_018826.1 | Irx5          | Mus musculus Iroquois related homeobox 5 (Drosophila) (Irx5), mRN |
| Down at 24 hrs | A_65_P13973 | 0.84 | 0.007             |               | Intronic in U031215                                               |
| Down at 24 hrs | A_65_P15369 | 0.84 | 0.012 NM_030257.1 | BC003322      | Mus musculus cDNA sequence BC003322 (BC003322), mRNA              |
| Down at 24 hrs | A_65_P14465 | 0.84 | 0.036 NM_153419.1 | AI504353      | Mus musculus expressed sequence AI504353 (AI504353), mRNA         |
| Down at 24 hrs | A_65_P14530 | 0.84 | 0.032             |               | Intronic in U035939                                               |
| Down at 24 hrs | A_65_P20376 | 0.84 | 0.008             |               | UNKNOWN                                                           |
| Down at 24 hrs | A_65_P11129 | 0.84 | 0.041 BC035278.1  |               | OXYSTEROL BINDING PROTEIN RELATED PROTEIN OSBP RELATED PROTEIN OR |
| Down at 24 hrs | A_65_P12767 | 0.84 | 0.024 NM_011343.1 | Sec61g        | UNKNOWN                                                           |
| Down at 24 hrs | A_65_P11938 | 0.84 | 0.028             | D2Ertd794e    | BROMODOMAIN ADJACENT TO ZINC FINGER DOMAIN                        |
| Down at 24 hrs | A_65_P14777 | 0.84 | 0.015 AK012731.1  | Fbnp3         | Mus musculus formin binding protein 3 (Fbnp3), mRNA               |
| Down at 24 hrs | A_65_P15502 | 0.84 | 0.038             |               | UNKNOWN                                                           |
| Down at 24 hrs | A_65_P16433 | 0.84 | 0.023 NM_026350.1 | 4930527D15Rik | Mus musculus RIKEN cDNA 4930527D15 gene (4930527D15Rik), mRNA     |
| Down at 24 hrs | A_65_P14042 | 0.84 | 0.011 NM_028466.1 | 3110043O21Rik | Mus musculus RIKEN cDNA 3110043O21 gene (3110043O21Rik), mRNA     |
| Down at 24 hrs | A_65_P12422 | 0.84 | 0.002 XM_133568.1 |               | UNKNOWN                                                           |
| Down at 24 hrs | A_65_P14122 | 0.84 | 0.045 XM_136638.1 | LOC241066     | G-protein beta WD-40 repeats with Beige/BEACH domain containing p |
| Down at 24 hrs | A_65_P17511 | 0.84 | 0.002 XM_126064.1 | 4930571L24    | Mus musculus similar to hypothetical protein FLJ11807 [Homo sapie |

|                |             |      |       |             |               |                                                                    |
|----------------|-------------|------|-------|-------------|---------------|--------------------------------------------------------------------|
| Down at 24 hrs | A_65_P07815 | 0.83 | 0.020 | NM_130405.1 | Sam68         | src associated in mitosis, 68 kDa                                  |
| Down at 24 hrs | A_65_P11748 | 0.83 | 0.027 |             |               | UNKNOWN                                                            |
| Down at 24 hrs | A_65_P18571 | 0.83 | 0.037 | NM_133886.1 | AU040320      | similar to PP791 PROTEIN [Homo sapiens]                            |
| Down at 24 hrs | A_65_P07309 | 0.83 | 0.005 | XM_126545.1 | Trim25        | ZINC FINGER PROTEIN 147 (ESTROGEN RESPONSIVE FINGER PROTEIN) (EFP) |
| Down at 24 hrs | A_65_P18859 | 0.83 | 0.002 | XM_149557.1 | Birc5         | UNKNOWN                                                            |
| Down at 24 hrs | A_65_P16194 | 0.83 | 0.010 | NM_033609.1 | Pcqap         | Mus musculus positive cofactor 2, multiprotein complex, glutamine  |
| Down at 24 hrs | A_65_P16297 | 0.83 | 0.004 | XM_128198.1 | 5033402L14Rik | weakly similar to AMINO ACID TRANSPORTER SYSTEM A [Rattus norvegi  |
| Down at 24 hrs | A_65_P14956 | 0.83 | 0.006 |             |               | Intronic in U023195                                                |
| Down at 24 hrs | A_65_P17539 | 0.83 | 0.026 | XM_181300.1 | 2310040C09Rik | hypothetical HMG-I and HMG-Y DNA-binding domain (A+T-hook) contai  |
| Down at 24 hrs | A_65_P18067 | 0.83 | 0.048 | XM_178601.1 | Elavl3        | Mus musculus RIKEN cDNA 2600009P04 gene (2600009P04Rik), mRNA      |
| Down at 24 hrs | A_65_P12699 | 0.83 | 0.027 | BC006073.1  | 4833421P10Rik | weakly similar to ECERIFERUM3 (CER3) [Arabidopsis thaliana]        |
| Down at 24 hrs | A_65_P05255 | 0.83 | 0.016 | NM_016784.1 | Plrg1         | Mus musculus pleiotropic regulator 1, PRL1 homolog (Arabidopsis)   |
| Down at 24 hrs | A_65_P13591 | 0.83 | 0.043 |             | Ephb2         | EPHRIN TYPE-B RECEPTOR 2 PRECURSOR (EC 2.7.1.112) (TYROSINE-PROTE  |
| Down at 24 hrs | A_65_P13766 | 0.83 | 0.005 | NM_019427.1 | Epb4.114b     | Mus musculus erythrocyte protein band 4.1-like 4b (Epb4.114b), mR  |
| Down at 24 hrs | A_65_P11058 | 0.83 | 0.033 | BC003841.1  | Trpc2         | Mus musculus transient receptor potential cation channel, subfam1  |
| Down at 24 hrs | A_65_P09005 | 0.83 | 0.010 |             | C76876        | Intronic in U025372                                                |
| Down at 24 hrs | A_65_P19923 | 0.83 | 0.046 |             | LOC223255     | Mus musculus similar to Serine/threonine protein kinase 24 (STE20  |
| Down at 24 hrs | A_65_P12107 | 0.83 | 0.034 | BC023375.1  | 1810073N04Rik | SIMILAR TO RIKEN CDNA N04                                          |
| Down at 24 hrs | A_65_P14287 | 0.83 | 0.048 |             |               | UNKNOWN                                                            |
| Down at 24 hrs | A_65_P13811 | 0.82 | 0.020 |             |               | UNKNOWN                                                            |
| Down at 24 hrs | A_65_P11880 | 0.82 | 0.017 | XM_126543.1 | Prkar1a       | (PROTEIN KINASE, CAMP DEPENDENT REGULATORY, TYPE 1, ALPHA) (GENE)  |
| Down at 24 hrs | A_65_P15313 | 0.82 | 0.037 | NM_024193.1 | 2310044F10Rik | NUCLEOLAR PROTEIN NOP56. [Source:SWISSPROT;Acc:Q9D6Z1]             |
| Down at 24 hrs | A_65_P18515 | 0.82 | 0.002 | NM_026545.1 | Psm8          | Mus musculus proteasome (prosome, macropain) 26S subunit, non-ATP  |
| Down at 24 hrs | A_65_P07705 | 0.82 | 0.009 | BC022586.1  | Rad51ap1      | UNKNOWN                                                            |
| Down at 24 hrs | A_65_P11922 | 0.82 | 0.017 | BC005442.1  | Nf2           | Mus musculus neurofibromatosis 2 (Nf2), mRNA                       |
| Down at 24 hrs | A_65_P13088 | 0.82 | 0.010 |             | Lamc1         | UNKNOWN                                                            |
| Down at 24 hrs | A_65_P13186 | 0.82 | 0.002 | NM_025463.1 | 1810009A15Rik | Mus musculus RIKEN cDNA 1810009A15 gene (1810009A15Rik), mRNA      |
| Down at 24 hrs | A_65_P09360 | 0.82 | 0.039 |             |               | UNKNOWN                                                            |
| Down at 24 hrs | A_65_P09905 | 0.82 | 0.036 | NM_011190.1 | Psme2         | PROTEASOME ACTIVATOR COMPLEX SUBUNIT 2 (PROTEASOME ACTIVATOR 28-B  |
| Down at 24 hrs | A_65_P14620 | 0.82 | 0.008 |             |               | UNKNOWN                                                            |
| Down at 24 hrs | A_65_P01355 | 0.82 | 0.038 | XM_122704.1 | Ktn1          | Mus musculus kinectin 1 (Ktn1), mRNA                               |
| Down at 24 hrs | A_65_P11925 | 0.82 | 0.003 | NM_029963.2 | Mrps5         | Mus musculus mitochondrial ribosomal protein S5 (Mrps5), mRNA      |
| Down at 24 hrs | A_65_P16601 | 0.82 | 0.032 |             |               | Intronic in U006661                                                |
| Down at 24 hrs | A_65_P18938 | 0.82 | 0.045 | BC017126.1  | Ncdn-pending  | Mus musculus neurochondrin (Ncdn-pending), mRNA                    |
| Down at 24 hrs | A_65_P15306 | 0.82 | 0.042 | NM_153126.1 | Al429152      | hypothetical Acyl-CoA N-acyltransferases (Nat) structure containi  |
| Down at 24 hrs | A_65_P16200 | 0.82 | 0.040 |             |               | UNKNOWN                                                            |
| Down at 24 hrs | A_65_P16328 | 0.82 | 0.044 | BC018321.1  | Rpl12         | UNKNOWN                                                            |
| Down at 24 hrs | A_65_P18197 | 0.82 | 0.041 | NM_130884.1 | ldh3b         | Mus musculus isocitrate dehydrogenase 3 (NAD+) beta (ldh3b), mRNA  |
| Down at 24 hrs | A_65_P18521 | 0.82 | 0.039 |             |               | UNKNOWN                                                            |
| Down at 24 hrs | A_65_P13318 | 0.82 | 0.015 |             |               | UNKNOWN                                                            |
| Down at 24 hrs | A_65_P13413 | 0.82 | 0.041 | NM_026211.1 | 2400003B06Rik | Mus musculus RIKEN cDNA 2400003B06 gene (2400003B06Rik), mRNA      |
| Down at 24 hrs | A_65_P13542 | 0.82 | 0.018 | XM_178458.1 | D19Wsu162e    | hypothetical Proline-rich region/Cytochrome c family heme-binding  |
| Down at 24 hrs | A_65_P00784 | 0.82 | 0.026 |             |               | UNKNOWN                                                            |
| Down at 24 hrs | A_65_P11376 | 0.82 | 0.010 |             |               | UNKNOWN                                                            |
| Down at 24 hrs | A_65_P13079 | 0.82 | 0.013 | NM_025849.1 | 3110001D03Rik | Mus musculus RIKEN cDNA 3110001D03 gene (3110001D03Rik), mRNA      |
| Down at 24 hrs | A_65_P18367 | 0.82 | 0.030 | NM_026617.1 | 0610007H07Rik | Mus musculus RIKEN cDNA 0610007H07 gene (0610007H07Rik), mRNA      |
| Down at 24 hrs | A_65_P10339 | 0.81 | 0.021 |             |               | Similar to: Rattus norvegicus similar to protein (peptidyl-prolyl  |
| Down at 24 hrs | A_65_P12020 | 0.81 | 0.039 | NM_010193.1 | Fem1b         | Mus musculus feminization 1 homolog b (C. elegans) (Fem1b), mRNA   |
| Down at 24 hrs | A_65_P12594 | 0.81 | 0.009 | XM_128601.1 | Sox8          | Mus musculus SRY-box containing gene 8 (Sox8), mRNA                |
| Down at 24 hrs | A_65_P07992 | 0.81 | 0.040 |             |               | Intronic in U000711                                                |
| Down at 24 hrs | A_65_P13535 | 0.81 | 0.024 | XM_177182.1 | C85344        | RIKEN cDNA 2310067E08 gene / putative [Mus musculus]               |
| Down at 24 hrs | A_65_P16314 | 0.81 | 0.023 | AF169621.1  | Itsn          | Similar to: Mus musculus Ese1 protein mRNA, partial cds            |
| Down at 24 hrs | A_65_P17454 | 0.81 | 0.002 | XM_128243.2 | 2210021J22Rik | Mus musculus RIKEN cDNA 2210021J22 gene (2210021J22Rik), mRNA      |
| Down at 24 hrs | A_65_P17660 | 0.81 | 0.019 |             |               | REPEAT-SEQUENCE                                                    |
| Down at 24 hrs | A_65_P02351 | 0.81 | 0.017 | NM_015736.1 | Galnt3        | Mus musculus UDP-N-acetyl-alpha-D-galactosamine:polypeptide N-ace  |
| Down at 24 hrs | A_65_P19726 | 0.81 | 0.021 | XM_126488.2 | 0710001K01Rik | GLUCOSE 6 PHOSPHATASE EC 3.1.3.9 G6PASE G 6                        |
| Down at 24 hrs | A_65_P18106 | 0.81 | 0.012 | XM_124085.1 | Lxn           | Mus musculus latexin (Lxn), mRNA                                   |
| Down at 24 hrs | A_65_P13459 | 0.81 | 0.047 |             |               | UNKNOWN                                                            |

|                |             |      |                   |                |                                                                    |
|----------------|-------------|------|-------------------|----------------|--------------------------------------------------------------------|
| Down at 24 hrs | A_65_P14814 | 0.81 | 0.017 NM_024434.1 | Lap3           | Mus musculus leucine aminopeptidase 3 (Lap3), mRNA                 |
| Down at 24 hrs | A_65_P16318 | 0.81 | 0.005 NM_008955.1 | Psx1           | Mus musculus placenta specific homeobox 1 (Psx1), mRNA             |
| Down at 24 hrs | A_65_P15042 | 0.80 | 0.029             | D12Erttd482e   | weakly similar to CG14903 PROTEIN [Drosophila melanogaster]        |
| Down at 24 hrs | A_65_P04407 | 0.80 | 0.012 NM_009939.1 | Cops2          | Mus musculus COP9 (constitutive photomorphogenic) homolog, subunit |
| Down at 24 hrs | A_65_P11295 | 0.80 | 0.025             | Timp4          | UNKNOWN                                                            |
| Down at 24 hrs | A_65_P14409 | 0.80 | 0.001 XM_127571.1 | MGC36213       | Mus musculus hypothetical protein MGC36213 (MGC36213), mRNA        |
| Down at 24 hrs | A_65_P10958 | 0.80 | 0.026             | 5730406M06Rik  | RIKEN cDNA 5730406M06 gene                                         |
| Down at 24 hrs | A_65_P12076 | 0.80 | 0.026             |                | UNKNOWN                                                            |
| Down at 24 hrs | A_65_P12089 | 0.80 | 0.009             |                | Intronic in U037061                                                |
| Down at 24 hrs | A_65_P15828 | 0.80 | 0.007 XM_124459.1 | Gnb1           | Mus musculus guanine nucleotide binding protein, beta 1 (Gnb1), m  |
| Down at 24 hrs | A_65_P16670 | 0.80 | 0.041 NM_144783.1 | Wt1            | Mus musculus Wilms tumor homolog (Wt1), mRNA                       |
| Down at 24 hrs | A_65_P05626 | 0.80 | 0.033 NM_025309.1 | Gpr97          | Mus musculus G protein-coupled receptor 97 (Gpr97), mRNA           |
| Down at 24 hrs | A_65_P14145 | 0.80 | 0.049 NM_145630.1 | Pdk3           | Mus musculus pyruvate dehydrogenase kinase, isoenzyme 3 (Pdk3), m  |
| Down at 24 hrs | A_65_P18977 | 0.80 | 0.029             | C80587         | similar to CDNA FLJ12671 FIS, CLONE NT2RM4002323, WEAKLY SIMILAR   |
| Down at 24 hrs | A_65_P11649 | 0.80 | 0.043             | 1300003O07Rik  | Mus musculus RIKEN cDNA 1300003O07 gene (1300003O07Rik), mRNA      |
| Down at 24 hrs | A_65_P14384 | 0.80 | 0.019 BC019444.1  | Coro1c         | Mus musculus coronin, actin binding protein 1C (Coro1c), mRNA      |
| Down at 24 hrs | A_65_P14871 | 0.80 | 0.032 NM_027865.1 | 0610039J01Rik  | Mus musculus RIKEN cDNA 0610039J01 gene (0610039J01Rik), mRNA      |
| Down at 24 hrs | A_65_P12199 | 0.80 | 0.007             |                | UNKNOWN                                                            |
| Down at 24 hrs | A_65_P12217 | 0.80 | 0.022 XM_126420.1 | Alox12         | Mus musculus arachidonate 12-lipoxygenase (Alox12), mRNA           |
| Down at 24 hrs | A_65_P12400 | 0.80 | 0.014 NM_008872.1 | Plat           | Mus musculus plasminogen activator, tissue (Plat), mRNA            |
| Down at 24 hrs | A_65_P13560 | 0.80 | 0.049 NM_019973.1 | Son            | Mus musculus Son cell proliferation protein (Son), mRNA            |
| Down at 24 hrs | A_65_P16197 | 0.80 | 0.004 NM_138671.1 | BC004012       | Mus musculus cDNA sequence BC004012 (BC004012), mRNA               |
| Down at 24 hrs | A_65_P06371 | 0.80 | 0.027 NM_025951.1 | Pi4k2b-pending | Mus musculus phosphatidylinositol 4-kinase type 2 beta (Pi4k2b-pe  |
| Down at 24 hrs | A_65_P10034 | 0.80 | 0.015             | 1200007L24Rik  | Mus musculus RIKEN cDNA 1200007L24 gene (1200007L24Rik), mRNA      |
| Down at 24 hrs | A_65_P14568 | 0.80 | 0.009 XM_152002.1 | 2610034M16Rik  | 2410017C19RIK PROTEIN                                              |
| Down at 24 hrs | A_65_P18577 | 0.80 | 0.016 XM_135838.1 |                | Mus musculus LOC211371 (LOC211371), mRNA                           |
| Down at 24 hrs | A_65_P08813 | 0.80 | 0.039 NM_133780.2 | C77892         | Mus musculus expressed sequence C77892 (C77892), mRNA              |
| Down at 24 hrs | A_65_P12024 | 0.80 | 0.049 BC019438.1  | AA410078       | Mus musculus, clone IMAGE:4024509, mRNA                            |
| Down at 24 hrs | A_65_P15842 | 0.80 | 0.032 NM_010531.1 | Il18bp         | INTERLEUKIN-18 BINDING PROTEIN PRECURSOR (IL-18BP) (INTERFERON GA  |
| Down at 24 hrs | A_65_P16409 | 0.80 | 0.030 NM_008749.1 | Nucb           | Mus musculus nucleobindin (Nucb), mRNA                             |
| Down at 24 hrs | A_65_P11090 | 0.80 | 0.047 NM_011602.2 | Tln            | Mus musculus talin (Tln), mRNA                                     |
| Down at 24 hrs | A_65_P16329 | 0.80 | 0.019 BC037705.1  | A1957255       | hypothetical P-loop containing nucleotide triphosphate hydrolases  |
| Down at 24 hrs | A_65_P17324 | 0.80 | 0.024 XM_148981.1 |                | Mus musculus LOC226538 (LOC226538), mRNA                           |
| Down at 24 hrs | A_65_P17389 | 0.80 | 0.014 NM_008537.1 | Amacr          | Mus musculus alpha-methylacyl-CoA racemase (Amacr), mRNA           |
| Down at 24 hrs | A_65_P17940 | 0.80 | 0.045             | MGC28931       | Similar to: Mus musculus hypothetical protein MGC28931 (MGC28931)  |
| Down at 24 hrs | A_65_P08969 | 0.79 | 0.039             |                | Intronic in U011857                                                |
| Down at 24 hrs | A_65_P10818 | 0.79 | 0.046             | AW546831       | CDNA FIS, CLONE , WEAKLY SIMILAR TO RHO GTPASE ACTIVATING PROTEIN  |
| Down at 24 hrs | A_65_P12025 | 0.79 | 0.024 NM_172666.1 | 5832437L22     | ALKYLDIHYDROXYACETONEPHOSPHATE SYNTHASE, PEROXISOMAL PRECURSOR EC  |
| Down at 24 hrs | A_65_P15912 | 0.79 | 0.004 XM_126385.1 | 0610039K22Rik  | HYPOTHETICAL 44.4 KDA PROTEIN. [Source:SPTREMBL;Acc:Q91YQ7]        |
| Down at 24 hrs | A_65_P07235 | 0.79 | 0.044             |                | UNKNOWN                                                            |
| Down at 24 hrs | A_65_P19620 | 0.79 | 0.006 XM_128021.1 | 2310047D01     | RING FINGER PROTEIN 13. [Source:SPTREMBL;Acc:Q9D8D3]               |
| Down at 24 hrs | A_65_P15058 | 0.79 | 0.013 NM_023138.1 | Map2k2         | UNKNOWN                                                            |
| Down at 24 hrs | A_65_P16805 | 0.79 | 0.040 NM_146124.1 | MGC7050        | Mus musculus hypothetical protein MGC7050 (MGC7050), mRNA          |
| Down at 24 hrs | A_65_P08646 | 0.79 | 0.028 NM_026447.1 | 2810423O19Rik  | CDNA FLJ32332 FIS, CLONE PROST2005121, WEAKLY SIMILAR TO PROBABLE  |
| Down at 24 hrs | A_65_P10123 | 0.79 | 0.015 NM_025630.1 | 2010009L17Rik  | hypothetical D111/G-patch domain/Forkhead-associated (FHA) domain  |
| Down at 24 hrs | A_65_P10895 | 0.79 | 0.045             |                | Intronic in U010893                                                |
| Down at 24 hrs | A_65_P20586 | 0.79 | 0.037 BC023820.1  | 6330410P18Rik  | FOLLICULAR VARIANT TRANSLOCATION PROTEIN 1 PRECURSOR FVT           |
| Down at 24 hrs | A_65_P13956 | 0.79 | 0.036 NM_139237.1 | LOC230082      | Mus musculus nucleolar RNA-associated protein (LOC230082), mRNA    |
| Down at 24 hrs | A_65_P15812 | 0.79 | 0.029 NM_030722.1 | Pum1           | Mus musculus pumilio 1 (Drosophila) (Pum1), mRNA                   |
| Down at 24 hrs | A_65_P20514 | 0.79 | 0.020 NM_028412.1 | 0610038H21Rik  | Mus musculus RIKEN cDNA 0610038H21 gene (0610038H21Rik), mRNA      |
| Down at 24 hrs | A_65_P09627 | 0.79 | 0.002             | D13Ertdd219e   | UNKNOWN                                                            |
| Down at 24 hrs | A_65_P16903 | 0.79 | 0.017             |                | UNKNOWN                                                            |
| Down at 24 hrs | A_65_P17624 | 0.79 | 0.048 XM_149168.1 | 1700020I14Rik  | Mus musculus RIKEN cDNA 1700020I14 gene (1700020I14Rik), mRNA      |
| Down at 24 hrs | A_65_P13430 | 0.79 | 0.020             |                | UNKNOWN                                                            |
| Down at 24 hrs | A_65_P15432 | 0.79 | 0.030 NM_008636.1 | Mtf1           | Mus musculus metal response element binding transcription factor   |
| Down at 24 hrs | A_65_P17950 | 0.79 | 0.012 AF113002.1  | Ncor2          | Mus musculus nuclear receptor co-repressor 2 (Ncor2), mRNA         |
| Down at 24 hrs | A_65_P13391 | 0.79 | 0.038 XM_126260.1 | Psmd11         | 26S PROTEASOME NON ATPASE REGULATORY SUBUNIT 11 26S PROTEASOME RE  |
| Down at 24 hrs | A_65_P16561 | 0.79 | 0.037             | Satb1          | Mus musculus special AT-rich sequence binding protein 1 (Satb1),   |

|                |             |      |                   |                |                                                                   |
|----------------|-------------|------|-------------------|----------------|-------------------------------------------------------------------|
| Down at 24 hrs | A_65_P16489 | 0.78 | 0.007 BC030049.1  | AW558573       | Similar to: Mus musculus adenosine deaminase (Adarb1) mRNA, compl |
| Down at 24 hrs | A_65_P12153 | 0.78 | 0.039             | AI662855       | tankyrase, TRF1-interacting ankyrin-related ADP-ribose polymerase |
| Down at 24 hrs | A_65_P13952 | 0.78 | 0.011 NM_008620.1 | Mpa2           | UNKNOWN                                                           |
| Down at 24 hrs | A_65_P14320 | 0.78 | 0.012 XM_125824.1 |                | UNKNOWN                                                           |
| Down at 24 hrs | A_65_P16319 | 0.78 | 0.045 XM_176749.1 |                | hypothetical ARM repeat structure containing protein              |
| Down at 24 hrs | A_65_P18342 | 0.78 | 0.022 NM_054044.1 | 9530074E10Rik  | Mus musculus RIKEN cDNA 9530074E10 gene (9530074E10Rik), mRNA     |
| Down at 24 hrs | A_65_P03669 | 0.78 | 0.006             | 3110068G20Rik  | Mus musculus ninein (Nin), mRNA                                   |
| Down at 24 hrs | A_65_P08650 | 0.78 | 0.026             |                | UNKNOWN                                                           |
| Down at 24 hrs | A_65_P13477 | 0.78 | 0.007             |                | UNKNOWN                                                           |
| Down at 24 hrs | A_65_P17725 | 0.78 | 0.017 NM_144528.1 | 2610010O19Rik  | Mus musculus RIKEN cDNA 2610010O19 gene (2610010O19Rik), mRNA     |
| Down at 24 hrs | A_65_P18096 | 0.78 | 0.016 NM_027212.1 | 1810038N03Rik  | Mus musculus RIKEN cDNA 1810038N03 gene (1810038N03Rik), mRNA     |
| Down at 24 hrs | A_65_P07896 | 0.78 | 0.033 XM_181292.1 | Psmc3ip        | TBPIP. [Source:SPTREMBL;Acc:O35047]                               |
| Down at 24 hrs | A_65_P15748 | 0.78 | 0.021 XM_125039.1 | Posh-pending   | Mus musculus plenty of SH3 domains (Posh-pending), mRNA           |
| Down at 24 hrs | A_65_P17186 | 0.78 | 0.015             | D11Ert729e     | UNKNOWN                                                           |
| Down at 24 hrs | A_65_P01664 | 0.78 | 0.012 NM_020296.1 | Rbms1          | Mus musculus RNA binding motif, single stranded interacting prote |
| Down at 24 hrs | A_65_P07982 | 0.78 | 0.031             | Cipp           | Mus musculus channel-interacting PDZ domain protein (Cipp), mRNA  |
| Down at 24 hrs | A_65_P08741 | 0.78 | 0.048             | AI256361       | C MPL BINDING                                                     |
| Down at 24 hrs | A_65_P09207 | 0.78 | 0.011 NM_008948.1 | Psmc3          | Mus musculus proteasome (prosome, macropain) 26S subunit, ATPase  |
| Down at 24 hrs | A_65_P10667 | 0.78 | 0.012 NM_009838.1 | Cct6a          | Mus musculus chaperonin subunit 6a (zeta) (Cct6a), mRNA           |
| Down at 24 hrs | A_65_P14410 | 0.78 | 0.030 NM_029571.1 | 1110001A12Rik  | UNKNOWN                                                           |
| Down at 24 hrs | A_65_P15468 | 0.78 | 0.037             | LOC213233      | UNKNOWN                                                           |
| Down at 24 hrs | A_65_P17758 | 0.78 | 0.031             | 6530406O07Rik  | Mus musculus RAB24, member RAS oncogene family (Rab24), mRNA      |
| Down at 24 hrs | A_65_P08496 | 0.78 | 0.021 NM_145531.1 | AA409446       | Mus musculus expressed sequence AA409446 (AA409446), mRNA         |
| Down at 24 hrs | A_65_P11759 | 0.78 | 0.030 BC020530.1  | Kdr            | Mus musculus kinase insert domain protein receptor (Kdr), mRNA    |
| Down at 24 hrs | A_65_P13896 | 0.78 | 0.009 BC024755.1  | Optn           | optineurin                                                        |
| Down at 24 hrs | A_65_P16287 | 0.78 | 0.046             |                | Intronic in U033752                                               |
| Down at 24 hrs | A_65_P02905 | 0.77 | 0.000 NM_146144.1 | MGC25559       | Mus musculus hypothetical protein MGC25559 (MGC25559), mRNA       |
| Down at 24 hrs | A_65_P08208 | 0.77 | 0.009 NM_030259.1 | BC003324       | Mus musculus cDNA sequence BC003324 (BC003324), mRNA              |
| Down at 24 hrs | A_65_P11944 | 0.77 | 0.039 XM_132099.2 | LOC212285      | UNKNOWN                                                           |
| Down at 24 hrs | A_65_P15449 | 0.77 | 0.027 NM_023403.1 | Mesdc2         | Mus musculus mesoderm development candiate 2 (Mesdc2), mRNA       |
| Down at 24 hrs | A_65_P16192 | 0.77 | 0.035 NM_031404.2 | Actl6          | Mus musculus actin-like 6 (Actl6), mRNA                           |
| Down at 24 hrs | A_65_P17430 | 0.77 | 0.011 XM_133607.2 | 2610034N24Rik  | hypothetical ARM repeat structure containing protein              |
| Down at 24 hrs | A_65_P08917 | 0.77 | 0.042 BC030480.1  | 5530401C11Rik  | Similar to: Rattus norvegicus similar to KIAA1424 protein [import |
| Down at 24 hrs | A_65_P18305 | 0.77 | 0.003             |                | UNKNOWN                                                           |
| Down at 24 hrs | A_65_P03344 | 0.77 | 0.041 NM_025550.1 | 2400006A19Rik  | Mus musculus RIKEN cDNA 2400006A19 gene (2400006A19Rik), mRNA     |
| Down at 24 hrs | A_65_P13321 | 0.77 | 0.024 NM_028238.4 | Rab38          | UNKNOWN                                                           |
| Down at 24 hrs | A_65_P15457 | 0.77 | 0.034 NM_016871.1 | Tomm40         | Mus musculus translocase of outer mitochondrial membrane 40 homol |
| Down at 24 hrs | A_65_P18792 | 0.77 | 0.023 XM_126564.1 | 2010002J11Rik  | SIMILAR TO PROTEIN KINASE, LYSINE DEFICIENT 4                     |
| Down at 24 hrs | A_65_P19307 | 0.77 | 0.014 BC012236.1  | Cd151          | Mus musculus CD151 antigen (Cd151), mRNA                          |
| Down at 24 hrs | A_65_P10685 | 0.77 | 0.032             |                | hypothetical Glutamine-rich region containing protein             |
| Down at 24 hrs | A_65_P13627 | 0.77 | 0.042 NM_025371.1 | Acy1           | Mus musculus aminoacylase 1 (Acy1), mRNA                          |
| Down at 24 hrs | A_65_P09957 | 0.77 | 0.021 XM_129018.2 | 6030430B19Rik  | SPIR 2                                                            |
| Down at 24 hrs | A_65_P11094 | 0.77 | 0.012             |                | Intronic in U032283                                               |
| Down at 24 hrs | A_65_P14292 | 0.77 | 0.047 XM_135528.2 | 9130002C22Rik  | 9130002C22RIK PROTEIN homolog [Mus musculus]                      |
| Down at 24 hrs | A_65_P08407 | 0.77 | 0.041 BC037116.1  | Add3           | Mus musculus adducin 3 (gamma) (Add3), mRNA                       |
| Down at 24 hrs | A_65_P10822 | 0.77 | 0.013 NM_144509.1 | Arl6ip4        | Mus musculus ADP-ribosylation-like factor 6 interacting protein 4 |
| Down at 24 hrs | A_65_P02440 | 0.77 | 0.004 NM_025281.1 | Lyar           | Mus musculus Ly1 antibody reactive clone (Lyar), mRNA             |
| Down at 24 hrs | A_65_P17462 | 0.77 | 0.027 NM_010239.1 | Fth            | UNKNOWN                                                           |
| Down at 24 hrs | A_65_P18121 | 0.77 | 0.035 BC019722.1  | AW536563       | Mus musculus p300/CBP-associated factor (Pcaf), mRNA              |
| Down at 24 hrs | A_65_P12490 | 0.77 | 0.030             | Mrps2          | Similar to: Mus musculus, clone IMAGE:3672187, mRNA               |
| Down at 24 hrs | A_65_P14723 | 0.77 | 0.027 NM_026970.1 | Mrpl44         | Mus musculus mitochondrial ribosomal protein L44 (Mrpl44), mRNA   |
| Down at 24 hrs | A_65_P15577 | 0.77 | 0.024             |                | Intronic in U038251                                               |
| Down at 24 hrs | A_65_P10052 | 0.77 | 0.037             |                | UNKNOWN                                                           |
| Down at 24 hrs | A_65_P13243 | 0.77 | 0.022 BC027759.1  | 1700009P13Rik  | Mus musculus hypothetical protein MGC19351 (MGC19351), mRNA       |
| Down at 24 hrs | A_65_P14471 | 0.77 | 0.048 BC027142.1  | Tp120a-pending | TIP120 FAMILY PROTEIN                                             |
| Down at 24 hrs | A_65_P14865 | 0.77 | 0.040 NM_027727.1 | 4933427L07Rik  | Mus musculus RIKEN cDNA 1810041M12 gene (1810041M12Rik), mRNA     |
| Down at 24 hrs | A_65_P14909 | 0.77 | 0.043 NM_146081.1 | Ppp4r1         | Mus musculus protein phosphatase 4, regulatory subunit 1 (Ppp4r1) |
| Down at 24 hrs | A_65_P16239 | 0.76 | 0.039 NM_026435.1 | 1810045K17Rik  | Mus musculus RIKEN cDNA 1810045K17 gene (1810045K17Rik), mRNA     |

|                |             |      |                   |               |                                                                   |
|----------------|-------------|------|-------------------|---------------|-------------------------------------------------------------------|
| Down at 24 hrs | A_65_P06036 | 0.76 | 0.023 NM_016676.1 | Rab10         | GTP-binding protein rab10 [Rattus norvegicus]                     |
| Down at 24 hrs | A_65_P13369 | 0.76 | 0.047 XM_147756.2 |               | UNKNOWN                                                           |
| Down at 24 hrs | A_65_P14349 | 0.76 | 0.031             |               | Intronic in U042770                                               |
| Down at 24 hrs | A_65_P09495 | 0.76 | 0.021 NM_018810.1 | Mkrn1         | Mus musculus makorin, ring finger protein, 1 (Mkrn1), mRNA        |
| Down at 24 hrs | A_65_P12357 | 0.76 | 0.045 U55060.1    | Lgals9        | Mus musculus lectin, galactose binding, soluble 9 (Lgals9), mRNA  |
| Down at 24 hrs | A_65_P13389 | 0.76 | 0.041 BC004016.1  | AI481316      | Mus musculus uridine-cytidine kinase 2 (Uck2-pending), mRNA       |
| Down at 24 hrs | A_65_P13561 | 0.76 | 0.033             | AA408251      | UNKNOWN                                                           |
| Down at 24 hrs | A_65_P16648 | 0.76 | 0.011 NM_008893.1 | Pola2         | Mus musculus polymerase (DNA directed), alpha 2 (Pola2), mRNA     |
| Down at 24 hrs | A_65_P16880 | 0.76 | 0.013             | C79250        | UNKNOWN                                                           |
| Down at 24 hrs | A_65_P05995 | 0.76 | 0.014 NM_018773.1 | Scap2         | Mus musculus src family associated phosphoprotein 2 (Scap2), mRNA |
| Down at 24 hrs | A_65_P09488 | 0.76 | 0.033             |               | UNKNOWN                                                           |
| Down at 24 hrs | A_65_P12797 | 0.76 | 0.020 XM_132577.1 | C230079P11    | CASPASE RECRUITMENT DOMAIN PROTEIN                                |
| Down at 24 hrs | A_65_P15396 | 0.76 | 0.033             |               | Intronic in U006661                                               |
| Down at 24 hrs | A_65_P15615 | 0.76 | 0.024 NM_026367.1 | 5830436K05Rik | Mus musculus RIKEN cDNA 5830436K05 gene (5830436K05Rik), mRNA     |
| Down at 24 hrs | A_65_P16163 | 0.76 | 0.007 XM_132490.1 | C330021B20    | hypothetical F-box domain containing protein                      |
| Down at 24 hrs | A_65_P16951 | 0.76 | 0.028 NM_144897.1 | Apoa1bp       | Mus musculus apolipoprotein A-I binding protein (Apoa1bp), mRNA   |
| Down at 24 hrs | A_65_P06167 | 0.76 | 0.006 NM_025647.1 | 0610011D08Rik | Mus musculus RIKEN cDNA 0610011D08 gene (0610011D08Rik), mRNA     |
| Down at 24 hrs | A_65_P12122 | 0.76 | 0.033             |               | UNKNOWN                                                           |
| Down at 24 hrs | A_65_P12533 | 0.76 | 0.024 NM_019870.1 | Ard1          | Mus musculus Rho GTPase activating protein 4 (Arhgap4), mRNA      |
| Down at 24 hrs | A_65_P17851 | 0.76 | 0.038             | C78376        | Mus musculus epithelial protein lost in neoplasm (Eplin-pending), |
| Down at 24 hrs | A_65_P11467 | 0.76 | 0.021             | MGC40859      | UNKNOWN                                                           |
| Down at 24 hrs | A_65_P11867 | 0.76 | 0.026             |               | UNKNOWN                                                           |
| Down at 24 hrs | A_65_P15066 | 0.76 | 0.009 XM_163788.2 | AI467246      | RHO GUANINE NUCLEOTIDE EXCHANGE FACTOR RHO INTERACTING PROTEIN 2  |
| Down at 24 hrs | A_65_P13728 | 0.76 | 0.043 NM_008468.1 | Kpna6         | Mus musculus karyopherin (importin) alpha 6 (Kpna6), mRNA         |
| Down at 24 hrs | A_65_P14990 | 0.76 | 0.010 D50580.1    |               | LIVER CARBOXYLESTERASE PRECURSOR EC 3.1.1.1                       |
| Down at 24 hrs | A_65_P17365 | 0.76 | 0.007 NM_008302.1 | Hsp84-1       | Mus musculus heat shock protein, 84 kDa 1 (Hsp84-1), mRNA         |
| Down at 24 hrs | A_65_P03369 | 0.76 | 0.020 Y00090.1    | Spn           | Mus musculus sialophorin (Spn), mRNA                              |
| Down at 24 hrs | A_65_P12941 | 0.76 | 0.032 XM_131343.2 | 1500001L20Rik | hypothetical Trp-Asp (WD) repeats profile/Trp-Asp (WD) repeats ci |
| Down at 24 hrs | A_65_P14316 | 0.76 | 0.002 XM_178430.1 |               | hypothetical Microbodies C-terminal targeting signal/E1-E2 ATPase |
| Down at 24 hrs | A_65_P09891 | 0.76 | 0.005 XM_128092.1 |               | Mus musculus similar to DKFZP564O0463 protein; HSPC064 protein [H |
| Down at 24 hrs | A_65_P12839 | 0.75 | 0.016 XM_130678.2 | 2310010I22Rik | HYPOTHETICAL 23.7 KDA PROTEIN (FRAGMENT). [Source:SPTREMBL;Acc:Q9 |
| Down at 24 hrs | A_65_P15931 | 0.75 | 0.039             |               | UNKNOWN                                                           |
| Down at 24 hrs | A_65_P08306 | 0.75 | 0.011 NM_028761.1 | Parn          | Mus musculus poly(A)-specific ribonuclease (deadenylation nucleas |
| Down at 24 hrs | A_65_P11828 | 0.75 | 0.024             | Kcnmb1        | Mus musculus potassium large conductance calcium-activated channe |
| Down at 24 hrs | A_65_P12404 | 0.75 | 0.048             |               | Intronic in U042318                                               |
| Down at 24 hrs | A_65_P14243 | 0.75 | 0.015             |               | UNKNOWN                                                           |
| Down at 24 hrs | A_65_P18383 | 0.75 | 0.042 XM_132493.2 |               | REPEAT-SEQUENCE                                                   |
| Down at 24 hrs | A_65_P09297 | 0.75 | 0.026 NM_023143.1 | C1r           | COMPLEMENT COMPONENT 1, R SUBCOMPONENT. [Source:RefSeq;Acc:NM_023 |
| Down at 24 hrs | A_65_P14708 | 0.75 | 0.034 NM_020580.1 | Th1l          | Mus musculus TH1-like homolog (Drosophila) (Th1l), mRNA           |
| Down at 24 hrs | A_65_P17762 | 0.75 | 0.003 XM_134266.1 | 2310015I10Rik | Mus musculus RIKEN cDNA 2310015I10 gene (2310015I10Rik), mRNA     |
| Down at 24 hrs | A_65_P19377 | 0.75 | 0.005 NM_008975.1 | Ptp4a3        | Mus musculus protein tyrosine phosphatase 4a3 (Ptp4a3), mRNA      |
| Down at 24 hrs | A_65_P10529 | 0.75 | 0.033 XM_133378.2 | 6030457N17Rik | SIMILAR TO RIKEN CDNA N17                                         |
| Down at 24 hrs | A_65_P13004 | 0.75 | 0.030 XM_126654.1 | 1700081L11Rik | UNKNOWN                                                           |
| Down at 24 hrs | A_65_P18790 | 0.75 | 0.011             |               | Intronic in U012694                                               |
| Down at 24 hrs | A_65_P12121 | 0.75 | 0.050             |               | Intronic in U014169                                               |
| Down at 24 hrs | A_65_P14244 | 0.75 | 0.026 XM_136730.1 |               | VESICULAR INTEGRAL MEMBRANE PROTEIN VIP36                         |
| Down at 24 hrs | A_65_P14943 | 0.75 | 0.025 NM_026126.1 | 4833415N24Rik | Mus musculus RIKEN cDNA 4833415N24 gene (4833415N24Rik), mRNA     |
| Down at 24 hrs | A_65_P18646 | 0.75 | 0.048 NM_009634.1 | Adsl          | Mus musculus adenylosuccinate lyase (Adsl), mRNA                  |
| Down at 24 hrs | A_65_P19438 | 0.75 | 0.048             |               | UNKNOWN                                                           |
| Down at 24 hrs | A_65_P11455 | 0.75 | 0.001 NM_146062.1 | MGC27795      | Mus musculus hypothetical protein MGC27795 (MGC27795), mRNA       |
| Down at 24 hrs | A_65_P12731 | 0.75 | 0.026 NM_011581.1 | Thbs2         | Mus musculus thrombospondin 2 (Thbs2), mRNA                       |
| Down at 24 hrs | A_65_P15341 | 0.75 | 0.012             | D3Erd452e     | Intronic in U023900                                               |
| Down at 24 hrs | A_65_P18113 | 0.75 | 0.037 NM_029880.1 | B830026H24Rik | Mus musculus RIKEN cDNA B830026H24 gene (B830026H24Rik), mRNA     |
| Down at 24 hrs | A_65_P10725 | 0.75 | 0.003 AK095066.1  | Tcf4          | Mus musculus transcription factor 4 (Tcf4), mRNA                  |
| Down at 24 hrs | A_65_P12765 | 0.75 | 0.032 XM_130349.2 |               | D 3 PHOSPHOGLYCERATE DEHYDROGENASE EC 1.1.1.95 3                  |
| Down at 24 hrs | A_65_P16871 | 0.75 | 0.043 NM_026959.1 | Stx18         | Mus musculus syntaxin 18 (Stx18), mRNA                            |
| Down at 24 hrs | A_65_P17144 | 0.75 | 0.020 XM_131742.1 | BC021769      | Mus musculus RIKEN cDNA 2810449C13 gene (2810449C13Rik), mRNA     |
| Down at 24 hrs | A_65_P13032 | 0.75 | 0.046             |               | Intronic in U025794                                               |

|                |             |      |                   |               |                                                                     |
|----------------|-------------|------|-------------------|---------------|---------------------------------------------------------------------|
| Down at 24 hrs | A_65_P15160 | 0.75 | 0.047 AB005540.1  | Pctk2         | Mus musculus PCTAIRE-motif protein kinase 2 (Pctk2), mRNA           |
| Down at 24 hrs | A_65_P15448 | 0.75 | 0.020 XM_170722.1 |               | UNKNOWN                                                             |
| Down at 24 hrs | A_65_P17420 | 0.75 | 0.041             |               | UNKNOWN                                                             |
| Down at 24 hrs | A_65_P09268 | 0.74 | 0.006 NM_026400.1 | Dnajb11       | Mus musculus DnaJ (Hsp40) homolog, subfamily B, member 11 (Dnajb11) |
| Down at 24 hrs | A_65_P19244 | 0.74 | 0.006 NM_010312.1 | Gnb2          | Mus musculus guanine nucleotide binding protein, beta 2 (Gnb2), m   |
| Down at 24 hrs | A_65_P14399 | 0.74 | 0.009 XM_131100.1 | Ovgp1         | Mus musculus RIKEN cDNA 2610312E17 gene (2610312E17Rik), mRNA       |
| Down at 24 hrs | A_65_P15512 | 0.74 | 0.045 NM_011378.1 | Sin3a         | Mus musculus transcriptional regulator, SIN3A (yeast) (Sin3a), mR   |
| Down at 24 hrs | A_65_P11029 | 0.74 | 0.043 NM_153420.1 | MGC38214      | Mus musculus hypothetical protein MGC38214 (MGC38214), mRNA         |
| Down at 24 hrs | A_65_P11351 | 0.74 | 0.025 XM_167747.2 |               | UNKNOWN                                                             |
| Down at 24 hrs | A_65_P13850 | 0.74 | 0.024 XM_149420.1 | Cd84          | UNKNOWN                                                             |
| Down at 24 hrs | A_65_P15711 | 0.74 | 0.046 BC021420.1  | Mlit3         | AF 9                                                                |
| Down at 24 hrs | A_65_P09265 | 0.74 | 0.004 NM_013760.1 | Dnajb9        | Mus musculus DnaJ (Hsp40) homolog, subfamily B, member 9 (Dnajb9)   |
| Down at 24 hrs | A_65_P09581 | 0.74 | 0.011             |               | Intronic in U042256                                                 |
| Down at 24 hrs | A_65_P11469 | 0.74 | 0.009             |               | Intronic in U043892                                                 |
| Down at 24 hrs | A_65_P12527 | 0.74 | 0.045 NM_025564.1 | 2010012C16Rik | Mus musculus RIKEN cDNA 2010012C16 gene (2010012C16Rik), mRNA       |
| Down at 24 hrs | A_65_P18904 | 0.74 | 0.015             | Gdap10        | UNKNOWN                                                             |
| Down at 24 hrs | A_65_P13617 | 0.74 | 0.027             |               | UNKNOWN                                                             |
| Down at 24 hrs | A_65_P16981 | 0.74 | 0.008             | AA408650      | UNKNOWN                                                             |
| Down at 24 hrs | A_65_P10514 | 0.74 | 0.011 XM_136222.1 |               | UNKNOWN                                                             |
| Down at 24 hrs | A_65_P12939 | 0.74 | 0.003 XM_127017.1 | Actn1         | ALPHA ACTININ ALPHA ACTININ F ACTIN CROSS LINKING                   |
| Down at 24 hrs | A_65_P13070 | 0.74 | 0.024 BC037689.1  | Ccnc          | Mus musculus cyclin C (Ccnc), mRNA                                  |
| Down at 24 hrs | A_65_P15284 | 0.74 | 0.037 XM_125843.2 | Mafb          | BASIC DOMAIN/LEUCINE ZIPPER TRANSCRIPTION FACTOR (FRAGMENT). [Sou   |
| Down at 24 hrs | A_65_P15570 | 0.74 | 0.047             | 2410012M04Rik | weakly similar to PUTATIVE DIPHTHINE SYNTHASE [Schizosaccharomyce   |
| Down at 24 hrs | A_65_P10720 | 0.74 | 0.050 NM_011290.1 | Rpl6          | Mus musculus ribosomal protein L6 (Rpl6), mRNA                      |
| Down at 24 hrs | A_65_P12986 | 0.74 | 0.001 NM_015762.1 | Txnrd1        | Mus musculus thioredoxin reductase 1 (Txnrd1), mRNA                 |
| Down at 24 hrs | A_65_P08814 | 0.73 | 0.013 NM_010064.1 | Dncic2        | Mus musculus dynein, cytoplasmic, intermediate chain 2 (Dncic2),    |
| Down at 24 hrs | A_65_P12426 | 0.73 | 0.010 XM_131869.1 | LOC230972     | Mus musculus similar to Rho guanine exchange factor 16; putative    |
| Down at 24 hrs | A_65_P15746 | 0.73 | 0.042             |               | Intronic in U038109                                                 |
| Down at 24 hrs | A_65_P16472 | 0.73 | 0.038 NM_023721.1 | Atp6v1d       | Mus musculus ATPase, H+ transporting, lysosomal 34kD, V1 subunit    |
| Down at 24 hrs | A_65_P09873 | 0.73 | 0.046             |               | UNKNOWN                                                             |
| Down at 24 hrs | A_65_P12582 | 0.73 | 0.022 NM_009929.1 | Col18a1       | Mus musculus procollagen, type XVIII, alpha 1 (Col18a1), mRNA       |
| Down at 24 hrs | A_65_P13420 | 0.73 | 0.012 XM_138696.1 |               | Intronic in U034933                                                 |
| Down at 24 hrs | A_65_P17623 | 0.73 | 0.001 NM_024219.1 | 0610007A03Rik | Mus musculus RIKEN cDNA 0610007A03 gene (0610007A03Rik), mRNA       |
| Down at 24 hrs | A_65_P09344 | 0.73 | 0.010 NM_023450.1 | 0610010M13Rik | Mus musculus RIKEN cDNA 0610010M13 gene (0610010M13Rik), mRNA       |
| Down at 24 hrs | A_65_P04205 | 0.73 | 0.048 XM_148955.1 |               | NUCLEAR UBIQUITOUS CASEIN AND CYCLIN DEPENDENT KINASES              |
| Down at 24 hrs | A_65_P11443 | 0.73 | 0.037             | AW121933      | CD44 ANTIGEN PRECURSOR (PHAGOCYTTIC GLYCOPROTEIN I) (PGP-1) (HUTCH  |
| Down at 24 hrs | A_65_P16322 | 0.73 | 0.043 BC017006.1  | AW552068      | Mus musculus RIKEN cDNA 2700059C12 gene (2700059C12Rik), mRNA       |
| Down at 24 hrs | A_65_P18218 | 0.73 | 0.033 NM_145923.1 | AA536743      | Mus musculus expressed sequence AA536743 (AA536743), mRNA           |
| Down at 24 hrs | A_65_P09224 | 0.73 | 0.049 D83674.1    | Mesp1         | Mouse mRNA for MesP1, complete cds                                  |
| Down at 24 hrs | A_65_P19983 | 0.73 | 0.024 XM_125731.2 | LOC216156     | REPEAT-SEQUENCE                                                     |
| Down at 24 hrs | A_65_P11268 | 0.73 | 0.033 XM_134314.1 | 2610307C23Rik | PROBABLE ATP DEPENDENT RNA HELICASE                                 |
| Down at 24 hrs | A_65_P16147 | 0.73 | 0.021 XM_158415.1 |               | UNKNOWN                                                             |
| Down at 24 hrs | A_65_P19250 | 0.73 | 0.025 NM_009679.1 | Ap2m1         | Mus musculus adaptor protein complex AP-2, mu1 (Ap2m1), mRNA        |
| Down at 24 hrs | A_65_P13848 | 0.73 | 0.003 NM_026041.1 | 2810430M08Rik | Mus musculus RIKEN cDNA 2810430M08 gene (2810430M08Rik), mRNA       |
| Down at 24 hrs | A_65_P14277 | 0.73 | 0.045 XM_126410.1 | 1810009O10Rik | hypothetical Cyclin containing protein                              |
| Down at 24 hrs | A_65_P15949 | 0.73 | 0.037             |               | Intronic in U032546                                                 |
| Down at 24 hrs | A_65_P13677 | 0.73 | 0.048             | Klf7          | Mus musculus Kruppel-like factor 7 (ubiquitous) (Klf7), mRNA        |
| Down at 24 hrs | A_65_P14003 | 0.73 | 0.014 NM_009070.1 | Rnps1         | Mus musculus ribonucleic acid binding protein S1 (Rnps1), mRNA      |
| Down at 24 hrs | A_65_P20030 | 0.73 | 0.047 NM_024277.1 | Rps27a        | Mus musculus ribosomal protein S27a (Rps27a), mRNA                  |
| Down at 24 hrs | A_65_P12931 | 0.73 | 0.045 XM_129852.2 | MGC58017      | Similar to: Mus musculus, clone IMAGE:4977517, mRNA                 |
| Down at 24 hrs | A_65_P13618 | 0.73 | 0.002             |               | Intronic in U031513                                                 |
| Down at 24 hrs | A_65_P13719 | 0.73 | 0.010 XM_130796.1 | 1300002C08Rik | Mus musculus RIKEN cDNA 1300002C08 gene (1300002C08Rik), mRNA       |
| Down at 24 hrs | A_65_P14942 | 0.73 | 0.018 XM_125775.1 |               | UNKNOWN                                                             |
| Down at 24 hrs | A_65_P16806 | 0.73 | 0.008 BC008519.1  | Pecam         | UNKNOWN                                                             |
| Down at 24 hrs | A_65_P11861 | 0.72 | 0.013 NM_026949.1 | Cnot8         | Mus musculus CCR4-NOT transcription complex, subunit 8 (Cnot8), m   |
| Down at 24 hrs | A_65_P13786 | 0.72 | 0.012 NM_138659.1 | Prpf8         | Mus musculus pre-mRNA processing factor 8 (Prpf8), mRNA             |
| Down at 24 hrs | A_65_P15738 | 0.72 | 0.008 NM_010260.1 | Gbp2          | Mus musculus guanylate nucleotide binding protein 2 (Gbp2), mRNA    |
| Down at 24 hrs | A_65_P19607 | 0.72 | 0.040 NM_019920.1 | Map2k1ip1     | Mus musculus mitogen-activated protein kinase kinase 1 interactin   |

|                |             |      |                   |               |                                                                   |
|----------------|-------------|------|-------------------|---------------|-------------------------------------------------------------------|
| Down at 24 hrs | A_65_P09943 | 0.72 | 0.015 XM_126441.2 | Ccr4          | 60S RIBOSOMAL PROTEIN L30.                                        |
| Down at 24 hrs | A_65_P10154 | 0.72 | 0.041 XM_132229.2 | MGC31204      | CYCLIN G ASSOCIATED KINASE                                        |
| Down at 24 hrs | A_65_P10501 | 0.72 | 0.010             | MGC41441      | Mus musculus hypothetical protein MGC41441 (MGC41441), mRNA       |
| Down at 24 hrs | A_65_P15948 | 0.72 | 0.028 NM_016741.1 | Scarb1        | SCAVENGER RECEPTOR CLASS B TYPE I (SCAVENGER RECEPTOR CLASS B1).  |
| Down at 24 hrs | A_65_P14233 | 0.72 | 0.034             |               | Intronic in U001410                                               |
| Down at 24 hrs | A_65_P14789 | 0.72 | 0.001 XM_129248.2 | AI447930      | UNKNOWN                                                           |
| Down at 24 hrs | A_65_P15169 | 0.72 | 0.020 XM_133123.2 | 3010033P07Rik | UNKNOWN                                                           |
| Down at 24 hrs | A_65_P16704 | 0.72 | 0.048 NM_016797.1 | Stx7          | Mus musculus syntaxin 7 (Stx7), mRNA                              |
| Down at 24 hrs | A_65_P19338 | 0.72 | 0.010             |               | UNKNOWN                                                           |
| Down at 24 hrs | A_65_P11611 | 0.72 | 0.022 XM_128336.2 | Dyrk1a        | Mus musculus dual-specificity tyrosine-(Y)-phosphorylation regula |
| Down at 24 hrs | A_65_P14373 | 0.72 | 0.037             | 0610007P06Rik | Mus musculus RIKEN cDNA 0610007P06 gene (0610007P06Rik), mRNA     |
| Down at 24 hrs | A_65_P18151 | 0.72 | 0.044 NM_025997.1 | 2610204K14Rik | Mus musculus RIKEN cDNA 2610204K14 gene (2610204K14Rik), mRNA     |
| Down at 24 hrs | A_65_P16524 | 0.72 | 0.043             | TAF-172       | TBP-ASSOCIATED FACTOR 172 (TAF-172) (TAF(II)170) homolog [Homo sa |
| Down at 24 hrs | A_65_P00983 | 0.72 | 0.032 XM_137196.1 |               | ZINC FINGER PROTEIN                                               |
| Down at 24 hrs | A_65_P09964 | 0.72 | 0.044 NM_133826.1 | 0710001F19Rik | similar to MSTP042 [Homo sapiens]                                 |
| Down at 24 hrs | A_65_P02814 | 0.72 | 0.049 NM_146159.1 | MGC36997      | Mus musculus hypothetical protein MGC36997 (MGC36997), mRNA       |
| Down at 24 hrs | A_65_P06145 | 0.72 | 0.047 NM_023429.1 | 6030432N09Rik | Mus musculus RIKEN cDNA 6030432N09 gene (6030432N09Rik), mRNA     |
| Down at 24 hrs | A_65_P14009 | 0.72 | 0.005 NM_029018.1 | 4833409J19Rik | Mus musculus RIKEN cDNA 4833409J19 gene (4833409J19Rik), mRNA     |
| Down at 24 hrs | A_65_P15993 | 0.72 | 0.031 NM_078478.1 | Ghitm         | Mus musculus growth hormone inducible transmembrane protein (Ghit |
| Down at 24 hrs | A_65_P16253 | 0.72 | 0.005 NM_025855.1 | D10Ert667e    | Mus musculus DNA segment, Chr 10, ERATO Doi 667, expressed (D10Er |
| Down at 24 hrs | A_65_P18213 | 0.72 | 0.008 XM_126762.2 |               | Mus musculus similar to homolog of yeast nuclear protein localiza |
| Down at 24 hrs | A_65_P20000 | 0.72 | 0.041             |               | UNKNOWN                                                           |
| Down at 24 hrs | A_65_P12690 | 0.72 | 0.023             | AI326115      | Mus musculus expressed sequence AI326115 (AI326115), mRNA         |
| Down at 24 hrs | A_65_P13681 | 0.72 | 0.014 XM_178454.1 | Pten          | Mus musculus phosphatase and tensin homolog (Pten), mRNA          |
| Down at 24 hrs | A_65_P15063 | 0.72 | 0.049 NM_013840.1 | Uxt           | Mus musculus ubiquitously expressed transcript (Uxt), mRNA        |
| Down at 24 hrs | A_65_P12719 | 0.72 | 0.006 AK018174.1  | 6330415A20Rik | RIKEN cDNA 6330415A20 gene                                        |
| Down at 24 hrs | A_65_P18945 | 0.72 | 0.026             |               | UNKNOWN                                                           |
| Down at 24 hrs | A_65_P15215 | 0.71 | 0.045 XM_129371.2 | Mrpl15        | RIBOSOMAL PROTEIN, MITOCHONDRIAL, L7 (MITOCHONDRIAL RIBOSOMAL PRO |
| Down at 24 hrs | A_65_P15742 | 0.71 | 0.034 NM_009170.1 | Shh           | Mus musculus sonic hedgehog homolog (Drosophila) (Shh), mRNA      |
| Down at 24 hrs | A_65_P18283 | 0.71 | 0.037 BC021635.1  | Nmt1          | Mus musculus N-myristoyltransferase 1 (Nmt1), mRNA                |
| Down at 24 hrs | A_65_P16995 | 0.71 | 0.026 XM_133979.1 | LOC233977     | LIPRIN ALPHA                                                      |
| Down at 24 hrs | A_65_P18658 | 0.71 | 0.031 AY139007.1  | AA960202      | TRANSFORMING ACIDIC COILED COIL CONTAINING PROTEIN                |
| Down at 24 hrs | A_65_P17659 | 0.71 | 0.016 NM_018749.1 | Eif3s7        | Mus musculus eukaryotic translation initiation factor 3, subunit  |
| Down at 24 hrs | A_65_P16216 | 0.71 | 0.034 NM_145417.1 | Rnpep         | Mus musculus similar to aminopeptidase B (LOC215615), mRNA        |
| Down at 24 hrs | A_65_P17311 | 0.71 | 0.030 NM_025635.1 | D10Ert749e    | Mus musculus DNA segment, Chr 10, ERATO Doi 749, expressed (D10Er |
| Down at 24 hrs | A_65_P18953 | 0.71 | 0.025 NM_028983.1 | 8430417G19Rik | Mus musculus elac homolog 1 (E. coli) (Elac1), mRNA               |
| Down at 24 hrs | A_65_P05086 | 0.71 | 0.012 NM_008300.1 | Hspa4         | Mus musculus heat shock 70 kDa protein 4 (Hspa4), mRNA            |
| Down at 24 hrs | A_65_P10632 | 0.71 | 0.038 NM_134129.2 | D19Wsu55e     | Mus musculus expressed sequence AA617263 (AA617263), mRNA         |
| Down at 24 hrs | A_65_P14977 | 0.71 | 0.043             |               | UNKNOWN                                                           |
| Down at 24 hrs | A_65_P17740 | 0.71 | 0.047 BC017146.1  | Xpr1          | Mus musculus xenotropic and polytropic retrovirus receptor 1 (Xpr |
| Down at 24 hrs | A_65_P15736 | 0.71 | 0.007 NM_053163.1 | Mrpl36        | Mus musculus mitochondrial ribosomal protein L36 (Mrpl36), mRNA   |
| Down at 24 hrs | A_65_P18268 | 0.71 | 0.034 NM_007918.1 | Eif4ebp1      | Mus musculus eukaryotic translation initiation factor 4E binding  |
| Down at 24 hrs | A_65_P09888 | 0.71 | 0.032 NM_010902.1 | Nfe2l2        | Mus musculus nuclear, factor, erythroid derived 2, like 2 (Nfe2l2 |
| Down at 24 hrs | A_65_P14911 | 0.71 | 0.041             |               | UNKNOWN                                                           |
| Down at 24 hrs | A_65_P18368 | 0.71 | 0.050 XM_129095.1 | Cfl1          | SORTING NEXIN                                                     |
| Down at 24 hrs | A_65_P12204 | 0.71 | 0.019 XM_132579.2 | 1110018D06Rik | PEST CONTAINING NUCLEAR                                           |
| Down at 24 hrs | A_65_P14821 | 0.71 | 0.008 AK014624.1  | 4731402B04Rik | Intronic in U016253                                               |
| Down at 24 hrs | A_65_P15082 | 0.71 | 0.050 XM_148032.1 | Chp           | Mus musculus calcium binding protein P22 (Chp-pending), mRNA      |
| Down at 24 hrs | A_65_P17422 | 0.71 | 0.036 NM_008839.1 | Pik3ca        | Mus musculus phosphatidylinositol 3-kinase, catalytic, alpha poly |
| Down at 24 hrs | A_65_P11591 | 0.71 | 0.005 XM_129058.2 | 6430411B10Rik | hypothetical Thioredoxin containing protein                       |
| Down at 24 hrs | A_65_P13880 | 0.71 | 0.015             | 5730409G15Rik | Mus musculus RIKEN cDNA 5730409G15 gene (5730409G15Rik), mRNA     |
| Down at 24 hrs | A_65_P11634 | 0.70 | 0.002 NM_009000.1 | Rab24         | Mus musculus RAB24, member RAS oncogene family (Rab24), mRNA      |
| Down at 24 hrs | A_65_P14445 | 0.70 | 0.012             |               | UNKNOWN                                                           |
| Down at 24 hrs | A_65_P13705 | 0.70 | 0.043             | C85133        | UNKNOWN                                                           |
| Down at 24 hrs | A_65_P20461 | 0.70 | 0.050             |               | UNKNOWN                                                           |
| Down at 24 hrs | A_65_P09270 | 0.70 | 0.006 XM_126257.2 |               | DEAD BOX PROTEIN                                                  |
| Down at 24 hrs | A_65_P15347 | 0.70 | 0.023             | AI462727      | Intronic in U018813                                               |
| Down at 24 hrs | A_65_P11274 | 0.70 | 0.019 XM_131918.2 | Psmc2         | 26S PROTEASE REGULATORY SUBUNIT 7 (MSS1 PROTEIN). [Source:SWISSPR |

|                |             |      |                   |               |                                                                   |
|----------------|-------------|------|-------------------|---------------|-------------------------------------------------------------------|
| Down at 24 hrs | A_65_P13803 | 0.70 | 0.023 NM_139149.1 | LOC233908     | Mus musculus pigpen (LOC233908), mRNA                             |
| Down at 24 hrs | A_65_P00771 | 0.70 | 0.032 XM_129572.1 | Cacybp        | CALCYCLIN BINDING PROTEIN (FRAGMENT). [Source:SPTREMBL;Acc:O70140 |
| Down at 24 hrs | A_65_P11210 | 0.70 | 0.008             |               | Intronic in U024801                                               |
| Down at 24 hrs | A_65_P13666 | 0.70 | 0.032 NM_010055.1 | Dlx3          | Mus musculus distal-less homeobox 3 (Dlx3), mRNA                  |
| Down at 24 hrs | A_65_P14306 | 0.70 | 0.049 NM_013715.1 | Cops5         | UNKNOWN                                                           |
| Down at 24 hrs | A_65_P15731 | 0.70 | 0.022 BC019184.1  | Mapkapk5      | UNKNOWN                                                           |
| Down at 24 hrs | A_65_P10371 | 0.70 | 0.041 NM_020050.1 | 2310004K06Rik | Mus musculus RIKEN cDNA 2310004K06 gene (2310004K06Rik), mRNA     |
| Down at 24 hrs | A_65_P14430 | 0.70 | 0.040 BC038175.1  | 2410002J21Rik | LIM-DOMAIN PROTEIN LMP-1 homolog [Rattus norvegicus]              |
| Down at 24 hrs | A_65_P15357 | 0.70 | 0.049             |               | Intronic in U034369                                               |
| Down at 24 hrs | A_65_P16402 | 0.70 | 0.017             |               | UNKNOWN                                                           |
| Down at 24 hrs | A_65_P11536 | 0.70 | 0.042 NM_006534.1 | Ncoa3         | Mus musculus nuclear receptor coactivator 3 (Ncoa3), mRNA         |
| Down at 24 hrs | A_65_P12977 | 0.70 | 0.010 NM_019794.1 | Dnaja2        | Mus musculus DnaJ (Hsp40) homolog, subfamily A, member 2 (Dnaja2) |
| Down at 24 hrs | A_65_P17372 | 0.70 | 0.030             |               | UNKNOWN                                                           |
| Down at 24 hrs | A_65_P10269 | 0.70 | 0.035             |               | UNKNOWN                                                           |
| Down at 24 hrs | A_65_P12760 | 0.70 | 0.045 NM_020493.1 | Srf           | Mus musculus serum response factor (Srf), mRNA                    |
| Down at 24 hrs | A_65_P15094 | 0.70 | 0.034 NM_017305.1 | Gclm          | Mus musculus glutamate-cysteine ligase, modifier subunit (Gclm),  |
| Down at 24 hrs | A_65_P16418 | 0.70 | 0.024 XM_149328.2 | 6530420C11Rik | Similar to: Mus musculus similar to Synaptotagmin XI (SytXI) (LOC |
| Down at 24 hrs | A_65_P17002 | 0.70 | 0.005 XM_126982.1 |               | CHURCHILL                                                         |
| Down at 24 hrs | A_65_P09779 | 0.69 | 0.025             |               | UNKNOWN                                                           |
| Down at 24 hrs | A_65_P12999 | 0.69 | 0.001             | C78115        | UNKNOWN                                                           |
| Down at 24 hrs | A_65_P16340 | 0.69 | 0.016 NM_007946.1 | Epx           | Mus musculus eosinophil peroxidase (Epx), mRNA                    |
| Down at 24 hrs | A_65_P19800 | 0.69 | 0.027             | AU021817      | UNKNOWN                                                           |
| Down at 24 hrs | A_65_P10262 | 0.69 | 0.024             |               | Intronic in U042678                                               |
| Down at 24 hrs | A_65_P10053 | 0.69 | 0.006 NM_133726.1 | 3110002K08Rik | Mus musculus RIKEN cDNA 3110002K08 gene (3110002K08Rik), mRNA     |
| Down at 24 hrs | A_65_P08545 | 0.69 | 0.039 NM_009456.1 | Ube2l3        | Mus musculus ubiquitin-conjugating enzyme E2L 3 (Ube2l3), mRNA    |
| Down at 24 hrs | A_65_P14666 | 0.69 | 0.004 XM_129991.1 | 1110046B24Rik | SELENIDE.WATER DIKINASE EC 2.7.9.3 SELENOPHOSPHATE SYNTHETASE SEL |
| Down at 24 hrs | A_65_P15813 | 0.69 | 0.048 NM_019725.1 | Tle2          | Mus musculus transducin-like enhancer of split 2, homolog of Dros |
| Down at 24 hrs | A_65_P17821 | 0.69 | 0.029             | AA408112      | hypothetical ABC1 family containing protein                       |
| Down at 24 hrs | A_65_P17925 | 0.69 | 0.030 AC005924.2  |               | similar to KIAA1525 PROTEIN [Homo sapiens]                        |
| Down at 24 hrs | A_65_P09648 | 0.69 | 0.000             |               | Intronic in U010535                                               |
| Down at 24 hrs | A_65_P11555 | 0.69 | 0.031 NM_021435.1 | AB041549      | Mus musculus hypothetical protein, MNCb-4414 (AB041549), mRNA     |
| Down at 24 hrs | A_65_P12703 | 0.69 | 0.020 XM_134779.1 | Timm8b        | Similar to: Mus musculus similar to hypothetical protein FLJ10726 |
| Down at 24 hrs | A_65_P14849 | 0.69 | 0.014 NM_144900.1 | Atp1a1        | Mus musculus hypothetical protein MGC38419 (MGC38419), mRNA       |
| Down at 24 hrs | A_65_P16671 | 0.69 | 0.014 NM_145931.1 | AI447294      | ROTAVIRUS X ASSOCIATED NON STRUCTURAL PROTEIN                     |
| Down at 24 hrs | A_65_P13278 | 0.69 | 0.025             |               | UNKNOWN                                                           |
| Down at 24 hrs | A_65_P11824 | 0.69 | 0.008             |               | weakly similar to HYPOTHETICAL 44.5 KDA PROTEIN [Macaca fasciula  |
| Down at 24 hrs | A_65_P16098 | 0.69 | 0.025             | BC004056      | Mus musculus cDNA sequence BC004056 (BC004056), mRNA              |
| Down at 24 hrs | A_65_P15747 | 0.68 | 0.003             | II13ra1       | UNKNOWN                                                           |
| Down at 24 hrs | A_65_P16616 | 0.68 | 0.048 NM_133732.1 | 4931406C07Rik | HYPOTHETICAL 35.0 KDA PROTEIN (UNKNOWN) (PROTEIN FOR MGC:6803). [ |
| Down at 24 hrs | A_65_P15377 | 0.68 | 0.023 NM_029103.1 | Armet         | Mus musculus arginine-rich, mutated in early stage tumors (Armet) |
| Down at 24 hrs | A_65_P19836 | 0.68 | 0.009 XM_132085.2 | 2510002A14Rik | hypothetical ARM repeat structure containing protein              |
| Down at 24 hrs | A_65_P14981 | 0.68 | 0.034 NM_026348.1 | 4930471O16Rik | UNKNOWN                                                           |
| Down at 24 hrs | A_65_P16105 | 0.68 | 0.005 NM_144837.1 | MGC27742      | Mus musculus hypothetical protein MGC27742 (MGC27742), mRNA       |
| Down at 24 hrs | A_65_P12101 | 0.68 | 0.038             | Hnrpk         | Mus musculus heterogeneous nuclear ribonucleoprotein K (Hnrpk), m |
| Down at 24 hrs | A_65_P18027 | 0.68 | 0.003 NM_008636.1 | Mtf1          | Mus musculus metal response element binding transcription factor  |
| Down at 24 hrs | A_65_P07806 | 0.68 | 0.017 AF030001.1  | Ager          | Mus musculus RIKEN cDNA 9030416H16 gene (9030416H16Rik), mRNA     |
| Down at 24 hrs | A_65_P17378 | 0.68 | 0.048 NM_145986.1 | MGC27770      | Mus musculus hypothetical protein MGC27770 (MGC27770), mRNA       |
| Down at 24 hrs | A_65_P10740 | 0.68 | 0.036 XM_125683.1 |               | Mus musculus similar to suppressor of var1, 3-like 1 (S. cerevisi |
| Down at 24 hrs | A_65_P05025 | 0.68 | 0.029 NM_008689.1 | Nfkb1         | nuclear factor of kappa light chain gene enhancer in B-cells 1, p |
| Down at 24 hrs | A_65_P07692 | 0.68 | 0.015 NM_011568.1 | Refbp1        | Mus musculus RNA and export factor binding protein 1 (Refbp1), mR |
| Down at 24 hrs | A_65_P12324 | 0.68 | 0.039             |               | UNKNOWN                                                           |
| Down at 24 hrs | A_65_P10288 | 0.67 | 0.043 BC012408.1  | Canx          | Mus musculus, Similar to calnexin, clone MGC:7708 IMAGE:3497769,  |
| Down at 24 hrs | A_65_P12230 | 0.67 | 0.004             |               | Intronic in U006531                                               |
| Down at 24 hrs | A_65_P13177 | 0.67 | 0.031             |               | UNKNOWN                                                           |
| Down at 24 hrs | A_65_P09728 | 0.67 | 0.019 NM_027113.1 | 2310009C03Rik | Mus musculus RIKEN cDNA 2310009C03 gene (2310009C03Rik), mRNA     |
| Down at 24 hrs | A_65_P13089 | 0.67 | 0.037             |               | UNKNOWN                                                           |
| Down at 24 hrs | A_65_P15255 | 0.67 | 0.037             |               | Intronic in U043504                                               |
| Down at 24 hrs | A_65_P15484 | 0.67 | 0.034 NM_053179.1 | Sas           | Mus musculus sialic acid synthase (Sas), mRNA                     |



|                |             |      |                   |                    |                                                                    |
|----------------|-------------|------|-------------------|--------------------|--------------------------------------------------------------------|
| Down at 24 hrs | A_65_P16454 | 0.67 | 0.020 AK011143.1  |                    | UNKNOWN                                                            |
| Down at 24 hrs | A_65_P13362 | 0.67 | 0.037 NM_053123.1 | Smarca1            | Mus musculus SWI/SNF related, matrix associated, actin dependent   |
| Down at 24 hrs | A_65_P15443 | 0.67 | 0.023 NM_015742.1 | Myo9b              | Mus musculus myosin IXb (Myo9b), mRNA                              |
| Down at 24 hrs | A_65_P16010 | 0.67 | 0.044 NM_009425.1 | Tnfsf10            | Mus musculus tumor necrosis factor (ligand) superfamily, member 1  |
| Down at 24 hrs | A_65_P17671 | 0.67 | 0.043             |                    | Intronic in U021429                                                |
| Down at 24 hrs | A_65_P15194 | 0.67 | 0.027 XM_130881.2 | D030048D22         | CDA02 PROTEIN homolog [Homo sapiens]                               |
| Down at 24 hrs | A_65_P13829 | 0.67 | 0.028 NM_145223.1 | Alms1              | Mus musculus Alstrom syndrome 1 homolog (human) (Alms1), mRNA      |
| Down at 24 hrs | A_65_P14953 | 0.67 | 0.028 XM_132749.2 | 1110061O04Rik      | RIKEN cDNA 1110061O04 gene                                         |
| Down at 24 hrs | A_65_P11981 | 0.67 | 0.027 XM_131452.1 | 1300019I21Rik      | (METHYLTHIOADENOSINE PHOSPHORYLASE) (GENE). [Source:SP TREMBL;Acc: |
| Down at 24 hrs | A_65_P18033 | 0.67 | 0.038 NM_026574.1 | 4632409L19Rik      | Mus musculus RIKEN cDNA 4632409L19 gene (4632409L19Rik), mRNA      |
| Down at 24 hrs | A_65_P12482 | 0.67 | 0.043 AK020583.1  | Srp9               | Mus musculus signal recognition particle 9 kDa (Srp9), mRNA        |
| Down at 24 hrs | A_65_P13204 | 0.67 | 0.023 NM_007991.1 | Fbl                | Mus musculus fibrillarlin (Fbl), mRNA                              |
| Down at 24 hrs | A_65_P13060 | 0.67 | 0.020             | 9430038I01Rik      | RIKEN cDNA 9430038I01 gene                                         |
| Down at 24 hrs | A_65_P13311 | 0.67 | 0.012 NM_145211.1 | Oas1a              | Mus musculus 2-5 oligoadenylate synthetase 1G (Oas1g), mRNA        |
| Down at 24 hrs | A_65_P16520 | 0.67 | 0.020 NM_017478.1 | Copg2              | Mus musculus coatomer protein complex, subunit gamma 2 (Copg2), m  |
| Down at 24 hrs | A_65_P12439 | 0.67 | 0.032 XM_130307.1 | Cry2               | PHOTOLYASE/BLUE-LIGHT RECEPTOR HOMOLOG2 (FRAGMENT). [Source:SP TRE |
| Down at 24 hrs | A_65_P08786 | 0.66 | 0.050 BC012508.1  | Set                | SET translocation                                                  |
| Down at 24 hrs | A_65_P09870 | 0.66 | 0.040 XM_131572.2 |                    | TRANSLATION INITIATION FACTOR EIF 2B GAMMA SUBUNIT EIF 2B GDP GTP  |
| Down at 24 hrs | A_65_P17595 | 0.66 | 0.021 NM_145354.1 | D13Wsu123e         | Mus musculus DNA segment, Chr 13, Wayne State University 123, exp  |
| Down at 24 hrs | A_65_P18615 | 0.66 | 0.047 NM_025821.2 | D16Ert465e         | Mus musculus DNA segment, Chr 16, ERATO Doi 465, expressed (D16Er  |
| Down at 24 hrs | A_65_P12920 | 0.66 | 0.011             |                    | Intronic in U009100                                                |
| Down at 24 hrs | A_65_P13577 | 0.66 | 0.048 NM_019780.1 | Vps29              | Mus musculus vacuolar protein sorting 29 (S. pombe) (Vps29), mRNA  |
| Down at 24 hrs | A_65_P13944 | 0.66 | 0.019 BC021643.1  |                    | UNKNOWN (PROTEIN FOR IMAGE:3491421) (FRAGMENT). [Source:SP TREMBL; |
| Down at 24 hrs | A_65_P14016 | 0.66 | 0.010 NM_011666.1 | Ube1c              | Mus musculus ubiquitin-activating enzyme E1C (Ube1c), mRNA         |
| Down at 24 hrs | A_65_P18381 | 0.66 | 0.026             |                    | UNKNOWN                                                            |
| Down at 24 hrs | A_65_P12903 | 0.66 | 0.040 AK008987.1  | 2210419I08Rik      | Mus musculus RIKEN cDNA 1110032E23 gene (1110032E23Rik), mRNA      |
| Down at 24 hrs | A_65_P16066 | 0.66 | 0.046             |                    | UNKNOWN                                                            |
| Down at 24 hrs | A_65_P18965 | 0.66 | 0.003 NM_009388.1 | Tkt                | Mus musculus transketolase (Tkt), mRNA                             |
| Down at 24 hrs | A_65_P10399 | 0.66 | 0.047 BC032937.1  | AU024132           | Mus musculus guanine nucleotide binding protein, alpha 13 (Gna13)  |
| Down at 24 hrs | A_65_P11661 | 0.66 | 0.028 NM_025430.1 | 1110066C01Rik      | Mus musculus RIKEN cDNA 1110066C01 gene (1110066C01Rik), mRNA      |
| Down at 24 hrs | A_65_P13120 | 0.66 | 0.049             |                    | UNKNOWN                                                            |
| Down at 24 hrs | A_65_P14840 | 0.66 | 0.022             |                    | Intronic in U032447                                                |
| Down at 24 hrs | A_65_P14987 | 0.66 | 0.019             |                    | UNKNOWN                                                            |
| Down at 24 hrs | A_65_P16413 | 0.66 | 0.048 NM_026028.1 | 2700091N06Rik      | Mus musculus RIKEN cDNA 2700091N06 gene (2700091N06Rik), mRNA      |
| Down at 24 hrs | A_65_P17173 | 0.66 | 0.028 NM_010368.1 | Gus                | Mus musculus beta-glucuronidase (Gus), mRNA                        |
| Down at 24 hrs | A_65_P19093 | 0.66 | 0.017 NM_013853.1 | Abcf2              | Mus musculus ATP-binding cassette, sub-family F (GCN20), member 2  |
| Down at 24 hrs | A_65_P14346 | 0.66 | 0.011 XM_139910.2 | LOC214917          | UNKNOWN                                                            |
| Down at 24 hrs | A_65_P18320 | 0.66 | 0.003 XM_006464.8 | Al415631           | Mus musculus calcium binding protein, 140 kDa (Cab140), mRNA       |
| Down at 24 hrs | A_65_P08655 | 0.66 | 0.045 NM_007935.1 | Epc1               | Mus musculus enhancer of polycomb homolog 1, (Drosophila) (Epc1),  |
| Down at 24 hrs | A_65_P12516 | 0.66 | 0.008 XM_134389.2 | Tex292             | Similar to: Mus musculus testis expressed gene 292 (Tex292), mRNA  |
| Down at 24 hrs | A_65_P16860 | 0.66 | 0.025             |                    | UNKNOWN                                                            |
| Down at 24 hrs | A_65_P18468 | 0.66 | 0.039 NM_145374.1 | BC020002           | Mus musculus cDNA sequence BC020002 (BC020002), mRNA               |
| Down at 24 hrs | A_65_P09446 | 0.66 | 0.038             | 2700007P21Rik      | DJ299F11.1 (SIMILAR TO D.MELANOGASTER PROTEIN (CG14464)) (FRAGMEN  |
| Down at 24 hrs | A_65_P10539 | 0.66 | 0.040 AB051505.1  |                    | Intronic in U027200                                                |
| Down at 24 hrs | A_65_P13837 | 0.66 | 0.044 NM_030243.1 | 0610033I05Rik      | Mus musculus RIKEN cDNA 0610033I05 gene (0610033I05Rik), mRNA      |
| Down at 24 hrs | A_65_P16175 | 0.66 | 0.025 NM_026881.1 | 1190006A08Rik      | PROTEIN PUTATIVE MEMBRANE                                          |
| Down at 24 hrs | A_65_P18772 | 0.66 | 0.043 BC002130.1  | Dusp14             | Mus musculus dual specificity phosphatase 14 (Dusp14), mRNA        |
| Down at 24 hrs | A_65_P13763 | 0.65 | 0.036 BC030872.1  |                    | Similar to: Mus musculus, clone IMAGE:5354506, mRNA                |
| Down at 24 hrs | A_65_P14309 | 0.65 | 0.039 BC022910.1  |                    | UNKNOWN                                                            |
| Down at 24 hrs | A_65_P18373 | 0.65 | 0.015 NM_007625.1 | Cbx4               | Mus musculus chromobox homolog 4 (Drosophila Pc class) (Cbx4), mR  |
| Down at 24 hrs | A_65_P15051 | 0.65 | 0.028             | D2Ert295e          | Possibly wrong strand                                              |
| Down at 24 hrs | A_65_P15190 | 0.65 | 0.003 AB002306.1  | 1810014J18Rik;CHD6 | hypothetical Chromo domain/DEAD/DEAH box helicase containing prot  |
| Down at 24 hrs | A_65_P15951 | 0.65 | 0.038 XM_178370.1 |                    | Mus musculus hypothetical gene supported by BC002310 (LOC263346),  |
| Down at 24 hrs | A_65_P18188 | 0.65 | 0.032 XM_125471.1 | Arhgap6            | Mus musculus Rho GTPase activating protein 6 (Arhgap6), mRNA       |
| Down at 24 hrs | A_65_P14060 | 0.65 | 0.048             |                    | UNKNOWN                                                            |
| Down at 24 hrs | A_65_P16984 | 0.65 | 0.020 AF312033.1  | Ache               | Intronic in U006322                                                |
| Down at 24 hrs | A_65_P06927 | 0.65 | 0.023 D78188.1    | Mtpn               | Similar to: Mus musculus myotrophin (Mtpn), mRNA                   |
| Down at 24 hrs | A_65_P12434 | 0.65 | 0.005             |                    | UNKNOWN                                                            |

|                |             |      |                   |               |                                                                   |
|----------------|-------------|------|-------------------|---------------|-------------------------------------------------------------------|
| Down at 24 hrs | A_65_P16179 | 0.65 | 0.026 NM_007637.1 | Cct5          | Mus musculus chaperonin subunit 5 (epsilon) (Cct5), mRNA          |
| Down at 24 hrs | A_65_P20295 | 0.65 | 0.048 XM_126926.2 | 1810035L17Rik | RIKEN cDNA 1810035L17 gene                                        |
| Down at 24 hrs | A_65_P20700 | 0.65 | 0.032             | Hist2         | FINGER PROTEIN FINGER PROTEIN TRIPARTITE MOTIF PROTEIN            |
| Down at 24 hrs | A_65_P11171 | 0.65 | 0.049 NM_133810.1 | A1120141      | Mus musculus expressed sequence A1120141 (A1120141), mRNA         |
| Down at 24 hrs | A_65_P12352 | 0.65 | 0.038             | C87583        | UNKNOWN                                                           |
| Down at 24 hrs | A_65_P18451 | 0.65 | 0.015 NM_172567.1 | 5730478C12    | hypothetical Generic methyl-transferase/SAM (and some other nucle |
| Down at 24 hrs | A_65_P15787 | 0.65 | 0.036 NM_152801.1 | Arhgef6       | Mus musculus Rac/Cdc42 guanine nucleotide exchange factor (GEF) 6 |
| Down at 24 hrs | A_65_P16797 | 0.65 | 0.008 BC011223.1  | Car1          | Mus musculus carbonic anhydrase 1 (Car1), mRNA                    |
| Down at 24 hrs | A_65_P10435 | 0.65 | 0.012 NM_028314.1 | 2700097O09Rik | Mus musculus RIKEN cDNA 2700097O09 gene (2700097O09Rik), mRNA     |
| Down at 24 hrs | A_65_P12064 | 0.65 | 0.040             |               | Intronic in U021543                                               |
| Down at 24 hrs | A_65_P13192 | 0.65 | 0.031             | Rnf13         | Mus musculus ring finger protein 13 (Rnf13), mRNA                 |
| Down at 24 hrs | A_65_P14344 | 0.65 | 0.006 NM_028604.1 | 2410075D05Rik | Mus musculus RIKEN cDNA 2410075D05 gene (2410075D05Rik), mRNA     |
| Down at 24 hrs | A_65_P11474 | 0.65 | 0.007             |               | SUCRASE ISOMALTASE, INTESTINAL [CONTAINS: SUCRASE EC 3.2.1.48 ; I |
| Down at 24 hrs | A_65_P12248 | 0.65 | 0.039             | 5730450N06Rik | UNKNOWN                                                           |
| Down at 24 hrs | A_65_P13291 | 0.65 | 0.049 XM_126327.1 | 1500005K14Rik | Mus musculus RIKEN cDNA 1500005K14 gene (1500005K14Rik), mRNA     |
| Down at 24 hrs | A_65_P14046 | 0.65 | 0.036 AB006034.1  | Cyp40         | 25-HYDROXYVITAMIN D-1 ALPHA HYDROXYLASE, MITOCHONDRIAL PRECURSOR  |
| Down at 24 hrs | A_65_P15188 | 0.65 | 0.006 XM_130472.1 | C77355        | hypothetical Serine/threonine specific protein phosphatase contai |
| Down at 24 hrs | A_65_P18411 | 0.65 | 0.027 NM_008733.1 | Nrap          | Mus musculus enigma homolog (R. norvegicus) (Enh-pending), mRNA   |
| Down at 24 hrs | A_65_P09972 | 0.64 | 0.040             |               | UNKNOWN                                                           |
| Down at 24 hrs | A_65_P11717 | 0.64 | 0.037             |               | Intronic in U013790                                               |
| Down at 24 hrs | A_65_P11948 | 0.64 | 0.047 NM_019975.1 | Hpcl-pending  | Mus musculus 2-hydroxyphytanoyl-CoA lyase (Hpcl-pending), mRNA    |
| Down at 24 hrs | A_65_P12720 | 0.64 | 0.026             |               | UNKNOWN                                                           |
| Down at 24 hrs | A_65_P13949 | 0.64 | 0.038 AF146793.2  | Ube2n-ps1     | Mus musculus TPA regulated locus (Tparl), mRNA                    |
| Down at 24 hrs | A_65_P16025 | 0.64 | 0.014 XM_147664.1 |               | Intronic in U014142                                               |
| Down at 24 hrs | A_65_P16780 | 0.64 | 0.007 NM_008562.1 | Mcl1          | Mus musculus myeloid cell leukemia sequence 1 (Mcl1), mRNA        |
| Down at 24 hrs | A_65_P18802 | 0.64 | 0.000 BC003757.1  | Rora          | Mus musculus RAR-related orphan receptor alpha (Rora), mRNA       |
| Down at 24 hrs | A_65_P14912 | 0.64 | 0.049 NM_153125.1 | MGC38812      | Mus musculus hypothetical protein MGC38812 (MGC38812), mRNA       |
| Down at 24 hrs | A_65_P16016 | 0.64 | 0.030 NM_015874.1 | A1843960      | Mus musculus recombining binding protein suppressor of hairless ( |
| Down at 24 hrs | A_65_P18348 | 0.64 | 0.045             |               | Mus musculus similar to KIAA0475 gene product (LOC215015), mRNA   |
| Down at 24 hrs | A_65_P18862 | 0.64 | 0.033 XM_126182.1 |               | KIAA0399 PROTEIN (FRAGMENT) homolog [Homo sapiens]                |
| Down at 24 hrs | A_65_P09604 | 0.64 | 0.028 NM_028146.1 | 2810427I04Rik | Mus musculus RIKEN cDNA 2810427I04 gene (2810427I04Rik), mRNA     |
| Down at 24 hrs | A_65_P13025 | 0.64 | 0.028 NM_010178.1 | Nssr          | Mus musculus neural-salient serine/arginine-rich (Nssr), mRNA     |
| Down at 24 hrs | A_65_P15382 | 0.64 | 0.019             |               | UNKNOWN                                                           |
| Down at 24 hrs | A_65_P15739 | 0.64 | 0.025             |               | UNKNOWN                                                           |
| Down at 24 hrs | A_65_P08992 | 0.64 | 0.004 NM_019779.1 | Cyp11a        | Mus musculus cytochrome P450, 11a, cholesterol side chain cleavag |
| Down at 24 hrs | A_65_P17416 | 0.64 | 0.022 BC033533.1  | 2410141M05Rik | UNKNOWN                                                           |
| Down at 24 hrs | A_65_P15818 | 0.64 | 0.005 NM_133691.1 | 2410104I19Rik | Mus musculus RIKEN cDNA 2410104I19 gene (2410104I19Rik), mRNA     |
| Down at 24 hrs | A_65_P17035 | 0.64 | 0.015             |               | Intronic in U013004                                               |
| Down at 24 hrs | A_65_P12028 | 0.64 | 0.047             |               | UNKNOWN                                                           |
| Down at 24 hrs | A_65_P12631 | 0.64 | 0.002             | 1110033O09Rik | Mus musculus RIKEN cDNA 1110033O09 gene (1110033O09Rik), mRNA     |
| Down at 24 hrs | A_65_P14529 | 0.64 | 0.011             |               | UNKNOWN                                                           |
| Down at 24 hrs | A_65_P15762 | 0.64 | 0.024             | 5730599O09Rik | Similar to: Mus musculus RIKEN cDNA 5730599O09 gene (5730599O09Ri |
| Down at 24 hrs | A_65_P12233 | 0.64 | 0.011 NM_025591.1 | 2010309E21Rik | Mus musculus RIKEN cDNA 2010309E21 gene (2010309E21Rik), mRNA     |
| Down at 24 hrs | A_65_P10284 | 0.64 | 0.039             | D3Ertd162e    | UNKNOWN                                                           |
| Down at 24 hrs | A_65_P12597 | 0.64 | 0.035             | 4632430A05Rik | Mus musculus RIKEN cDNA 2410002O22 gene (2410002O22Rik), mRNA     |
| Down at 24 hrs | A_65_P12983 | 0.64 | 0.002             | C77717        | UNKNOWN                                                           |
| Down at 24 hrs | A_65_P17466 | 0.64 | 0.032 AK022869.1  |               | UNKNOWN                                                           |
| Down at 24 hrs | A_65_P18280 | 0.64 | 0.006 NM_145706.1 | 2610529I12Rik | Mus musculus RIKEN cDNA 2610529I12 gene (2610529I12Rik), mRNA     |
| Down at 24 hrs | A_65_P12549 | 0.64 | 0.006 NM_026058.1 | 2900019C14Rik | Mus musculus RIKEN cDNA 2900019C14 gene (2900019C14Rik), mRNA     |
| Down at 24 hrs | A_65_P11950 | 0.64 | 0.008 NM_009004.1 | Rab6kifl      | Mus musculus Rab6, kinesin-like (Rab6kifl), mRNA                  |
| Down at 24 hrs | A_65_P12063 | 0.64 | 0.028             |               | Intronic in U014196                                               |
| Down at 24 hrs | A_65_P12570 | 0.64 | 0.043 NM_023502.1 | 2610036A20Rik | Mus musculus RIKEN cDNA 2610036A20 gene (2610036A20Rik), mRNA     |
| Down at 24 hrs | A_65_P16129 | 0.64 | 0.039             |               | UNKNOWN                                                           |
| Down at 24 hrs | A_65_P17532 | 0.64 | 0.019 NM_025690.1 | 5730555F13Rik | RIKEN cDNA 5730555F13 gene                                        |
| Down at 24 hrs | A_65_P18687 | 0.64 | 0.001 U57691.1    | Ntan1         | Possibly wrong strand                                             |
| Down at 24 hrs | A_65_P15044 | 0.63 | 0.034             |               | UNKNOWN                                                           |
| Down at 24 hrs | A_65_P18221 | 0.63 | 0.043 NM_024545.2 | 2610304F09Rik | Mus musculus 10 days embryo whole body cDNA, RIKEN full-length en |
| Down at 24 hrs | A_65_P12563 | 0.63 | 0.001 NM_173181.1 | 3110050N22Rik | Similar to CGI-62 protein (Homo sapiens)                          |

|                |             |      |                   |               |                                                                   |
|----------------|-------------|------|-------------------|---------------|-------------------------------------------------------------------|
| Down at 24 hrs | A_65_P17101 | 0.63 | 0.001             |               | Intronic in U042100                                               |
| Down at 24 hrs | A_65_P14581 | 0.63 | 0.002 NM_025617.1 | 2210012G02Rik | Mus musculus RIKEN cDNA 2210012G02 gene (2210012G02Rik), mRNA     |
| Down at 24 hrs | A_65_P10665 | 0.63 | 0.018 XM_124890.1 | Pgam1         | UNKNOWN                                                           |
| Down at 24 hrs | A_65_P14312 | 0.63 | 0.015             | C76493        | Intronic in U037237                                               |
| Down at 24 hrs | A_65_P11041 | 0.63 | 0.034             |               | UNKNOWN                                                           |
| Down at 24 hrs | A_65_P15354 | 0.63 | 0.000             |               | Intronic in U032698                                               |
| Down at 24 hrs | A_65_P17091 | 0.63 | 0.035             | AI426270      | NUCLEAR ZINC FINGER PROTEIN                                       |
| Down at 24 hrs | A_65_P18272 | 0.63 | 0.007 BC016476.1  | Tbp           | Mus musculus TATA box binding protein (Tbp), mRNA                 |
| Down at 24 hrs | A_65_P09264 | 0.63 | 0.046 BC014710.1  | Spnr          | Mus musculus spermatid perinuclear RNA binding protein (Spnr), mR |
| Down at 24 hrs | A_65_P15114 | 0.63 | 0.007 AK012744.1  | Bub3          | Mus musculus budding uninhibited by benzimidazoles 3 homolog (S.  |
| Down at 24 hrs | A_65_P16096 | 0.63 | 0.000 XM_132816.2 | 0610039A15Rik | HYPOTHETICAL 30.0 KDA PROTEIN. [Source:SPTREMBL;Acc:Q99K13]       |
| Down at 24 hrs | A_65_P16667 | 0.63 | 0.040 AL117650.1  | Arih1         | ARIADNE-1 PROTEIN HOMOLOG (ARI-1) (UBIQUITIN-CONJUGATING ENZYME E |
| Down at 24 hrs | A_65_P10834 | 0.63 | 0.021 XM_131439.1 | B430108F07Rik | Mus musculus RIKEN cDNA B430108F07 gene (B430108F07Rik), mRNA     |
| Down at 24 hrs | A_65_P04605 | 0.63 | 0.020 BC003303.1  | Bcap29        | Mus musculus B-cell receptor-associated protein 29 (Bcap29), mRNA |
| Down at 24 hrs | A_65_P10768 | 0.63 | 0.038             | C76132        | UNKNOWN                                                           |
| Down at 24 hrs | A_65_P16450 | 0.63 | 0.007             |               | UNKNOWN                                                           |
| Down at 24 hrs | A_65_P16603 | 0.63 | 0.048 NM_007522.1 | Bad           | Mus musculus Bcl-associated death promoter (Bad), mRNA            |
| Down at 24 hrs | A_65_P10848 | 0.63 | 0.012             |               | Intronic in U006608                                               |
| Down at 24 hrs | A_65_P14739 | 0.63 | 0.002             |               | Intronic in U011895                                               |
| Down at 24 hrs | A_65_P15248 | 0.63 | 0.009 XM_125875.2 | Gtpat12       | SSX2 INTERACTING PROTEIN HRABIN3A, ISOFORM                        |
| Down at 24 hrs | A_65_P17432 | 0.63 | 0.047 NM_024221.1 | Pdhh          | Mus musculus pyruvate dehydrogenase (lipoamide) beta (Pdhh), mRNA |
| Down at 24 hrs | A_65_P11854 | 0.63 | 0.015             |               | REPEAT-SEQUENCE                                                   |
| Down at 24 hrs | A_65_P17064 | 0.63 | 0.036             | 1810015H18Rik | Mus musculus RIKEN cDNA 1810015H18 gene (1810015H18Rik), mRNA     |
| Down at 24 hrs | A_65_P18379 | 0.63 | 0.034             | AV117194      | Mus musculus ankyrin repeat and SOCS box-containing protein 4 (As |
| Down at 24 hrs | A_65_P12499 | 0.62 | 0.018 NM_008927.1 | Map2k1        | Mus musculus mitogen activated protein kinase kinase 1 (Map2k1),  |
| Down at 24 hrs | A_65_P09773 | 0.62 | 0.044             |               | Intronic in U023076                                               |
| Down at 24 hrs | A_65_P12827 | 0.62 | 0.046             |               | UNKNOWN                                                           |
| Down at 24 hrs | A_65_P14066 | 0.62 | 0.048 XM_132718.1 | 2810403P18Rik | similar to CDNA FLJ10539 FIS, CLONE NT2RP2001218 [Homo sapiens]   |
| Down at 24 hrs | A_65_P14386 | 0.62 | 0.002 BC005436.1  | C1d-pending   | Mus musculus nuclear DNA binding protein (C1d-pending), mRNA      |
| Down at 24 hrs | A_65_P07241 | 0.62 | 0.036 AY057069.1  | Bnip3l        | Mus musculus BCL2/adenovirus E1B 19 kDa-interacting protein 3-lik |
| Down at 24 hrs | A_65_P10513 | 0.62 | 0.024 XM_132231.1 | MGC29037      | Mus musculus hypothetical protein MGC29037 (MGC29037), mRNA       |
| Down at 24 hrs | A_65_P14218 | 0.62 | 0.021             |               | UNKNOWN                                                           |
| Down at 24 hrs | A_65_P08931 | 0.62 | 0.002 XM_134129.1 | 1700029A22Rik | RIKEN cDNA 1700029A22 gene                                        |
| Down at 24 hrs | A_65_P13062 | 0.62 | 0.047 BC034751.1  | Epb4.1l1      | Mus musculus erythrocyte protein band 4.1-like 1 (Epb4.1l1), mRNA |
| Down at 24 hrs | A_65_P16775 | 0.62 | 0.014 XM_129477.2 | 1600013L13Rik | RIKEN cDNA 1600013L13 gene                                        |
| Down at 24 hrs | A_65_P19171 | 0.62 | 0.031 XM_129772.1 | 9330140K16    | COLLYBISTIN                                                       |
| Down at 24 hrs | A_65_P20797 | 0.62 | 0.036             |               | Intronic in U031542                                               |
| Down at 24 hrs | A_65_P14880 | 0.62 | 0.040             |               | UNKNOWN                                                           |
| Down at 24 hrs | A_65_P18120 | 0.62 | 0.007 NM_025836.1 | 1300012C15Rik | Mus musculus RIKEN cDNA 1300012C15 gene (1300012C15Rik), mRNA     |
| Down at 24 hrs | A_65_P18308 | 0.62 | 0.034 NM_026306.1 | 0610038D11Rik | Mus musculus RIKEN cDNA 0610038D11 gene (0610038D11Rik), mRNA     |
| Down at 24 hrs | A_65_P20004 | 0.62 | 0.049 NM_010160.1 | Cugbp2        | REPEAT-SEQUENCE                                                   |
| Down at 24 hrs | A_65_P17828 | 0.62 | 0.019 NM_011494.1 | Stk16         | Mus musculus serine/threonine kinase 16 (Stk16), mRNA             |
| Down at 24 hrs | A_65_P17142 | 0.62 | 0.008 XM_126195.2 | D11Ert530e    | HYPOTHETICAL 12.8 KDA PROTEIN (FRAGMENT). [Source:SPTREMBL;Acc:Q9 |
| Down at 24 hrs | A_65_P13550 | 0.62 | 0.038             |               | UNKNOWN                                                           |
| Down at 24 hrs | A_65_P15276 | 0.62 | 0.016             |               | Intronic in U033210                                               |
| Down at 24 hrs | A_65_P16383 | 0.62 | 0.030             | Skp2          | Mus musculus S-phase kinase-associated protein 2 (p45) (Skp2), mR |
| Down at 24 hrs | A_65_P18390 | 0.62 | 0.010 NM_027117.1 | 2310022K15Rik | Mus musculus RIKEN cDNA 2310022K15 gene (2310022K15Rik), mRNA     |
| Down at 24 hrs | A_65_P12127 | 0.62 | 0.026 BC033039.1  |               | LEUCINE RICH REPEAT CONTAINING G PROTEIN COUPLED RECEPTOR 5 PRECU |
| Down at 24 hrs | A_65_P14269 | 0.62 | 0.011 NM_024214.1 | 1810060K07Rik | Mus musculus RIKEN cDNA 1810060K07 gene (1810060K07Rik), mRNA     |
| Down at 24 hrs | A_65_P15001 | 0.62 | 0.038             |               | UNKNOWN                                                           |
| Down at 24 hrs | A_65_P15140 | 0.62 | 0.049             | C78524        | UNKNOWN                                                           |
| Down at 24 hrs | A_65_P18460 | 0.62 | 0.016 NM_010892.1 | Nek2          | Mus musculus NIMA (never in mitosis gene a)-related expressed kin |
| Down at 24 hrs | A_65_P11236 | 0.61 | 0.021             |               | Intronic in U003434                                               |
| Down at 24 hrs | A_65_P15371 | 0.61 | 0.041 NM_008538.1 | Marcks        | Mus musculus myristoylated alanine rich protein kinase C substrat |
| Down at 24 hrs | A_65_P11761 | 0.61 | 0.010 XM_133094.2 | 2610507O21Rik | HYPOTHETICAL 17.5 KDA PROTEIN. [Source:SPTREMBL;Acc:Q99JR0]       |
| Down at 24 hrs | A_65_P12612 | 0.61 | 0.033 BC005745.1  | 5730536A07Rik | Mus musculus RIKEN cDNA 5730536A07 gene (5730536A07Rik), mRNA     |
| Down at 24 hrs | A_65_P13938 | 0.61 | 0.036 BC026368.1  | Ncoa6ip       | Mus musculus nuclear receptor coactivator 6 interacting protein ( |
| Down at 24 hrs | A_65_P15370 | 0.61 | 0.015 BC025555.1  | 4933435A13Rik | hypothetical ATP/GTP-binding site motif A (P-loop) containing pro |

|                |             |      |                   |                |                                                                     |
|----------------|-------------|------|-------------------|----------------|---------------------------------------------------------------------|
| Down at 24 hrs | A_65_P16929 | 0.61 | 0.003 U09218.1    | Ppm1b          | PROTEIN PHOSPHATASE 2C BETA ISOFORM (EC 3.1.3.16) (PP2C-BETA) (IA   |
| Down at 24 hrs | A_65_P18576 | 0.61 | 0.025 XM_130706.1 | Rbl1           | RETINOBLASTOMA-LIKE PROTEIN 1 (107 KDA RETINOBLASTOMA-ASSOCIATED    |
| Down at 24 hrs | A_65_P19334 | 0.61 | 0.008 XM_133487.1 | 2410018A17Rik  | PROTEIN ARGININE N-METHYLTRANSFERASE 3 (EC 2.1.1.-) (FRAGMENT). [   |
| Down at 24 hrs | A_65_P16814 | 0.61 | 0.010 BC010709.1  | PsmA5          | UNKNOWN                                                             |
| Down at 24 hrs | A_65_P17086 | 0.61 | 0.027 NM_145934.1 | AW049765       | REPEAT-SEQUENCE                                                     |
| Down at 24 hrs | A_65_P07569 | 0.61 | 0.012             | Rock1          | Mus musculus Rho-associated coiled-coil forming kinase 1 (Rock1),   |
| Down at 24 hrs | A_65_P13687 | 0.61 | 0.022 AJ278191.1  | Mc7-pending    | Mus musculus brain cDNA 7 (Mc7-pending), mRNA                       |
| Down at 24 hrs | A_65_P04651 | 0.61 | 0.039 NM_133834.1 | AA407306       | Mus musculus expressed sequence AA407306 (AA407306), mRNA           |
| Down at 24 hrs | A_65_P07521 | 0.61 | 0.027 NM_025824.2 | Bzw1           | Cross Reactive                                                      |
| Down at 24 hrs | A_65_P10674 | 0.61 | 0.005             |                | Intronic in U032992                                                 |
| Down at 24 hrs | A_65_P11104 | 0.61 | 0.012 NM_145522.1 | LOC227746      | Mus musculus similar to Rab9 effector p40 (LOC227746), mRNA         |
| Down at 24 hrs | A_65_P13003 | 0.61 | 0.024 XM_133874.1 |                | hypothetical P-loop containing nucleotide triphosphate hydrolases   |
| Down at 24 hrs | A_65_P14848 | 0.61 | 0.049             | AW240603       | UNKNOWN                                                             |
| Down at 24 hrs | A_65_P17833 | 0.61 | 0.010 NM_025784.1 | Bcs1l          | Mus musculus BCS1-like (yeast) (Bcs1l), mRNA                        |
| Down at 24 hrs | A_65_P14713 | 0.61 | 0.027 NM_011715.1 | Wdr1           | REPEAT-SEQUENCE                                                     |
| Down at 24 hrs | A_65_P12132 | 0.61 | 0.042 NM_133688.1 | 4930469P12Rik  | Similar to: Mus musculus, Similar to 5-oxoprolinase (ATP-hydrolysis |
| Down at 24 hrs | A_65_P17979 | 0.61 | 0.047             |                | UNKNOWN                                                             |
| Down at 24 hrs | A_65_P11704 | 0.61 | 0.034 NM_008815.1 | Pea3           | Mus musculus polyomavirus enhancer activator 3 (Pea3), mRNA         |
| Down at 24 hrs | A_65_P16802 | 0.61 | 0.019 NM_026708.1 | 0610030G03Rik  | Mus musculus RIKEN cDNA 0610030G03 gene (0610030G03Rik), mRNA       |
| Down at 24 hrs | A_65_P10963 | 0.60 | 0.046 NM_016809.1 | Rbm3           | Mus musculus RNA binding motif protein 3 (Rbm3), mRNA               |
| Down at 24 hrs | A_65_P11628 | 0.60 | 0.041             | AI847218       | Mus musculus optic atrophy 1 homolog (human) (Opa1), mRNA           |
| Down at 24 hrs | A_65_P12438 | 0.60 | 0.034             |                | UNKNOWN                                                             |
| Down at 24 hrs | A_65_P14237 | 0.60 | 0.011             | AU044581       | NOPAR homolog [Homo sapiens]                                        |
| Down at 24 hrs | A_65_P16487 | 0.60 | 0.020             |                | Intronic in U017992                                                 |
| Down at 24 hrs | A_65_P15345 | 0.60 | 0.003             |                | CDNA FIS, CLONE , WEAKLY SIMILAR TO ENDONUCLEASE C1F12 06C EC 3     |
| Down at 24 hrs | A_65_P10098 | 0.60 | 0.020             |                | REPEAT-SEQUENCE                                                     |
| Down at 24 hrs | A_65_P12610 | 0.60 | 0.020 XM_134371.2 | 4930566A11Rik  | UNKNOWN                                                             |
| Down at 24 hrs | A_65_P14559 | 0.60 | 0.000 XM_134540.2 | Ddx38          | PRE MRNA SPLICING FACTOR RNA HELICASE DEAH BOX PROTEIN              |
| Down at 24 hrs | A_65_P16292 | 0.60 | 0.024 NM_011488.1 | Stat5a         | Mus musculus signal transducer and activator of transcription 5A    |
| Down at 24 hrs | A_65_P08481 | 0.60 | 0.044             | 2610036L11Rik  | RIKEN cDNA 2610036L11 gene                                          |
| Down at 24 hrs | A_65_P14290 | 0.60 | 0.002 XM_136485.2 |                | UNKNOWN                                                             |
| Down at 24 hrs | A_65_P15115 | 0.60 | 0.012 BC030311.1  | 1200015K23Rik  | CDNA FLJ10859 FIS, CLONE NT2RP4001567, WEAKLY SIMILAR TO ARMADILL   |
| Down at 24 hrs | A_65_P10642 | 0.60 | 0.005 NM_026040.1 | 2810036K01Rik  | Mus musculus RIKEN cDNA 2810036K01 gene (2810036K01Rik), mRNA       |
| Down at 24 hrs | A_65_P10717 | 0.60 | 0.002 XM_136153.1 | Ofd1           | PUTATIVE CXORF-5 RELATED PROTEIN (FRAGMENT). [Source:SPTREMBL;Acc   |
| Down at 24 hrs | A_65_P16301 | 0.60 | 0.007 NM_148932.1 | Pom121         | Mus musculus nuclear pore membrane protein 121 (Pom121), mRNA       |
| Down at 24 hrs | A_65_P12831 | 0.60 | 0.048             |                | UNKNOWN                                                             |
| Down at 24 hrs | A_65_P13370 | 0.60 | 0.027 BC006934.1  | Arl6ip2        | Mus musculus ADP-ribosylation-like factor 6 interacting protein 2   |
| Down at 24 hrs | A_65_P13557 | 0.60 | 0.035 M21495.1    |                | UNKNOWN                                                             |
| Down at 24 hrs | A_65_P18018 | 0.60 | 0.046 NM_146096.1 | MGC40949       | Mus musculus hypothetical protein MGC40949 (MGC40949), mRNA         |
| Down at 24 hrs | A_65_P20699 | 0.60 | 0.006 NM_011903.1 | Ttk2           | Mus musculus tousled-like kinase 2 (Arabidopsis) (Ttk2), mRNA       |
| Down at 24 hrs | A_65_P14033 | 0.60 | 0.038 NM_032544.1 | Gtpbp3-pending | Mus musculus RIKEN cDNA 2410009F13 gene (2410009F13Rik), mRNA       |
| Down at 24 hrs | A_65_P17249 | 0.60 | 0.034             |                | Similar to: Mus musculus 3 days neonate thymus cDNA, RIKEN full-l   |
| Down at 24 hrs | A_65_P17715 | 0.60 | 0.027 NM_024475.1 | BC002236       | Mus musculus cDNA sequence BC002236 (BC002236), mRNA                |
| Down at 24 hrs | A_65_P11505 | 0.60 | 0.023             | BC003314       | REPEAT-SEQUENCE                                                     |
| Down at 24 hrs | A_65_P11965 | 0.60 | 0.009             |                | UNKNOWN                                                             |
| Down at 24 hrs | A_65_P16298 | 0.60 | 0.036             | C77164         | UNKNOWN                                                             |
| Down at 24 hrs | A_65_P19362 | 0.60 | 0.048 NM_053194.1 | AI114950       | Similar to: Mus musculus, clone MGC:7038 IMAGE:3156151, mRNA, com   |
| Down at 24 hrs | A_65_P11464 | 0.60 | 0.011 AL831981.1  | Tcf12          | Mus musculus transcription factor 12 (Tcf12), mRNA                  |
| Down at 24 hrs | A_65_P14680 | 0.60 | 0.044             |                | UNKNOWN                                                             |
| Down at 24 hrs | A_65_P15378 | 0.60 | 0.002 XM_127614.1 |                | DNA DIRECTED RNA POLYMERASE LARGEST SUBUNIT EC 2.7.7.6              |
| Down at 24 hrs | A_65_P13946 | 0.59 | 0.001 XM_135204.1 |                | UNKNOWN                                                             |
| Down at 24 hrs | A_65_P19623 | 0.59 | 0.006 NM_026899.1 | 1500011L16Rik  | Mus musculus RIKEN cDNA 1500011L16 gene (1500011L16Rik), mRNA       |
| Down at 24 hrs | A_65_P10710 | 0.59 | 0.046 NM_172049.1 | DKFZp434C1714  | Mus musculus hypothetical protein DKFZp434C1714 (DKFZp434C1714),    |
| Down at 24 hrs | A_65_P17534 | 0.59 | 0.037             |                | Intronic in U001258                                                 |
| Down at 24 hrs | A_65_P18814 | 0.59 | 0.024             | Sema3f         | Mus musculus sema domain, immunoglobulin domain (Ig), short basic   |
| Down at 24 hrs | A_65_P13382 | 0.59 | 0.044             | Map3k14        | Mus musculus mitogen-activated protein kinase kinase kinase 14 (M   |
| Down at 24 hrs | A_65_P13573 | 0.59 | 0.045             | Rb1cc1         | Mus musculus RB1-inducible coiled-coil 1 (Rb1cc1), mRNA             |
| Down at 24 hrs | A_65_P14844 | 0.59 | 0.006 XM_134405.1 | Cdh3           | CADHERIN-3 PRECURSOR (PLACENTAL-CADHERIN) (P-CADHERIN). [Source:S   |

|                |             |      |                   |               |                                                                   |
|----------------|-------------|------|-------------------|---------------|-------------------------------------------------------------------|
| Down at 24 hrs | A_65_P16347 | 0.59 | 0.011             | Cbl           | Mus musculus Casitas B-lineage lymphoma (Cbl), mRNA               |
| Down at 24 hrs | A_65_P18659 | 0.59 | 0.046             | Eef1b2        | Mus musculus eukaryotic translation elongation factor 1 beta 2 (E |
| Down at 24 hrs | A_65_P14618 | 0.59 | 0.041 XM_134752.2 | E430039K05Rik | HYPOTHETICAL 67.2 KDA PROTEIN homolog [Homo sapiens]              |
| Down at 24 hrs | A_65_P18128 | 0.59 | 0.029 BC005616.1  | Slc33a1       | Mus musculus acetyl-Coenzyme A transporter (Acatn), mRNA          |
| Down at 24 hrs | A_65_P13200 | 0.59 | 0.033             |               | Intronic in U007410                                               |
| Down at 24 hrs | A_65_P15645 | 0.59 | 0.044 NM_133975.2 | Gli6          | UNKNOWN                                                           |
| Down at 24 hrs | A_65_P15841 | 0.59 | 0.038             |               | Intronic in U043694                                               |
| Down at 24 hrs | A_65_P16490 | 0.59 | 0.035 BC025467.1  | A1586002      | UNKNOWN                                                           |
| Down at 24 hrs | A_65_P16570 | 0.59 | 0.030 NM_026213.1 | 2900001O04Rik | Mus musculus RIKEN cDNA 2900001O04 gene (2900001O04Rik), mRNA     |
| Down at 24 hrs | A_65_P14183 | 0.59 | 0.042 NM_025480.2 | 2810021O14Rik | Mus musculus RIKEN cDNA 2810021O14 gene (2810021O14Rik), mRNA     |
| Down at 24 hrs | A_65_P15429 | 0.59 | 0.004 XM_127562.2 | 5430405N12Rik | Similar to: Mus musculus RIKEN cDNA 5430405N12 gene (5430405N12Ri |
| Down at 24 hrs | A_65_P18227 | 0.59 | 0.013             |               | Intronic in U009750                                               |
| Down at 24 hrs | A_65_P11517 | 0.59 | 0.012 NM_004229.1 |               | RECEPTOR PROTEIN COMPLEX COMPONENT                                |
| Down at 24 hrs | A_65_P13176 | 0.59 | 0.046 BC028654.1  | Stk4          | Mus musculus serine/threonine kinase 4 (Stk4), mRNA               |
| Down at 24 hrs | A_65_P15513 | 0.59 | 0.030             | A1595366      | UNKNOWN                                                           |
| Down at 24 hrs | A_65_P17255 | 0.59 | 0.003 XM_125637.2 | Rhobtb1       | UNKNOWN                                                           |
| Down at 24 hrs | A_65_P18044 | 0.59 | 0.021 NM_008961.1 | Pter          | Mus musculus phosphotriesterase related (Pter), mRNA              |
| Down at 24 hrs | A_65_P11768 | 0.59 | 0.027 NM_145511.1 | LOC226499     | Mus musculus similar to chromosome 1 open reading frame 27 (LOC22 |
| Down at 24 hrs | A_65_P13696 | 0.59 | 0.006 AF226873.1  | Rab1          | weakly similar to KIAA0582 PROTEIN (UNKNOWN) (PROTEIN FOR MGC:251 |
| Down at 24 hrs | A_65_P18891 | 0.59 | 0.042 NM_013933.1 | Vapa          | Mus musculus vesicle-associated membrane protein, associated prot |
| Down at 24 hrs | A_65_P14313 | 0.59 | 0.016 XM_178419.1 | Krt2-7        | REPEAT-SEQUENCE                                                   |
| Down at 24 hrs | A_65_P14890 | 0.59 | 0.010 L34078.1    | Xrcc1         | Mus musculus FKSG27 (FKSG27), mRNA                                |
| Down at 24 hrs | A_65_P15157 | 0.59 | 0.017 NM_009164.1 | Sh3bp1        | Mus musculus SH3-domain binding protein 1 (Sh3bp1), mRNA          |
| Down at 24 hrs | A_65_P16759 | 0.59 | 0.006 BC031571.1  | LOC238799     | IMPORTIN BETA 2 SUBUNIT KARYOPHERIN BETA 2 SUBUNIT TRANSPORTIN M9 |
| Down at 24 hrs | A_65_P13168 | 0.59 | 0.012             |               | Intronic in U014231                                               |
| Down at 24 hrs | A_65_P15844 | 0.59 | 0.008             | Tacstd2       | Mus musculus tumor-associated calcium signal transducer 2 (Tacstd |
| Down at 24 hrs | A_65_P17328 | 0.59 | 0.028 NM_011968.1 | Psma6         | Mus musculus proteasome (prosome, macropain) subunit, alpha type  |
| Down at 24 hrs | A_65_P18296 | 0.59 | 0.015             | Snap23        | Mus musculus synaptosomal-associated protein, 23kD (Snap23), mRNA |
| Down at 24 hrs | A_65_P16033 | 0.58 | 0.009 NM_172295.1 | MGC47256      | Mus musculus hypothetical protein MGC47256 (MGC47256), mRNA       |
| Down at 24 hrs | A_65_P12900 | 0.58 | 0.024 NM_012887.1 | AW547477      | THYMOPOIETIN. [Source:RefSeq;Acc:NM_011605]                       |
| Down at 24 hrs | A_65_P14025 | 0.58 | 0.022 NM_015132.2 |               | SORTING NEXIN 13 RGS DOMAIN AND PHOX DOMAIN CONTAINING PROTEIN RG |
| Down at 24 hrs | A_65_P16007 | 0.58 | 0.001 NM_133805.1 | 9430009J09Rik | Mus musculus expressed sequence AA408242 (AA408242), mRNA         |
| Down at 24 hrs | A_65_P11306 | 0.58 | 0.015 XM_139814.2 |               | ZINC FINGER PROTEIN                                               |
| Down at 24 hrs | A_65_P17092 | 0.58 | 0.043 NM_026835.1 | Ms4a6d        | Mus musculus membrane-spanning 4-domains, subfamily A, member 6D  |
| Down at 24 hrs | A_65_P17469 | 0.58 | 0.033 NM_010561.1 | Ilf3          | Mus musculus interleukin enhancer binding factor 3 (Ilf3), mRNA   |
| Down at 24 hrs | A_65_P16963 | 0.58 | 0.027 NM_146128.1 | MGC37636      | Mus musculus hypothetical protein MGC37636 (MGC37636), mRNA       |
| Down at 24 hrs | A_65_P18509 | 0.58 | 0.035             | C77614        | UNKNOWN                                                           |
| Down at 24 hrs | A_65_P04258 | 0.58 | 0.006 BC006966.1  | Gsr           | Mus musculus glutathione reductase 1 (Gsr), mRNA                  |
| Down at 24 hrs | A_65_P14688 | 0.58 | 0.018             |               | UNKNOWN                                                           |
| Down at 24 hrs | A_65_P11022 | 0.58 | 0.038             |               | UNKNOWN                                                           |
| Down at 24 hrs | A_65_P14495 | 0.58 | 0.007 NM_133767.1 | 2410112O06Rik | SIMILAR TO MITOCHONDRIAL TRANSLATIONAL INITIATION FACTOR 2. [Sour |
| Down at 24 hrs | A_65_P15726 | 0.58 | 0.023 NM_008687.1 | Nfib          | Mus musculus nuclear factor I/B (Nfib), mRNA                      |
| Down at 24 hrs | A_65_P11755 | 0.58 | 0.016 XM_134416.2 | 1500026N15Rik | Mus musculus RIKEN cDNA 1500026N15 gene (1500026N15Rik), mRNA     |
| Down at 24 hrs | A_65_P12413 | 0.58 | 0.014 XM_133744.2 | MGC32263      | HYPOTHETICAL BRAIN PROTEIN                                        |
| Down at 24 hrs | A_65_P13903 | 0.58 | 0.041 NM_030153.1 | C030004C14Rik | Mus musculus RIKEN cDNA C030004C14 gene (C030004C14Rik), mRNA     |
| Down at 24 hrs | A_65_P16515 | 0.58 | 0.000 NM_018737.1 | Ctps2         | Mus musculus cytidine 5-triphosphate synthase 2 (Ctps2), mRNA     |
| Down at 24 hrs | A_65_P17250 | 0.58 | 0.048 BC020990.1  | Pml           | Mus musculus promyelocytic leukemia (Pml), mRNA                   |
| Down at 24 hrs | A_65_P19634 | 0.58 | 0.036             | Abcd4         | UNKNOWN                                                           |
| Down at 24 hrs | A_65_P19928 | 0.58 | 0.016             | LOC192196     | Intronic in U006693                                               |
| Down at 24 hrs | A_65_P12481 | 0.58 | 0.003 NM_009534.1 | Yap           | Mus musculus yes-associated protein, 65 kDa (Yap), mRNA           |
| Down at 24 hrs | A_65_P14449 | 0.58 | 0.044             |               | Intronic in U012335                                               |
| Down at 24 hrs | A_65_P15415 | 0.58 | 0.001             |               | Intronic in U025488                                               |
| Down at 24 hrs | A_65_P16514 | 0.58 | 0.021             | AU015253      | UNKNOWN                                                           |
| Down at 24 hrs | A_65_P10771 | 0.58 | 0.011             |               | Intronic in U041791                                               |
| Down at 24 hrs | A_65_P14351 | 0.58 | 0.017 AK003597.1  | 1110008P08Rik | Similar to: Mus musculus similar to hypothetical protein DKFZp434 |
| Down at 24 hrs | A_65_P07994 | 0.57 | 0.022 NM_029936.1 | Ddx10         | Mus musculus DEAD/H (Asp-Glu-Ala-Asp/His) box polypeptide 10 (RNA |
| Down at 24 hrs | A_65_P10192 | 0.57 | 0.029 XM_127681.2 | Lgals3        | GALECTIN-3 (GALACTOSE-SPECIFIC LECTIN 3) (MAC-2 ANTIGEN) (IGE-BIN |
| Down at 24 hrs | A_65_P15522 | 0.57 | 0.004             | 3010002C02Rik | RIKEN cDNA 3010002C02 gene. Possibly intronic.                    |

|                |             |      |                   |                |                                                                    |
|----------------|-------------|------|-------------------|----------------|--------------------------------------------------------------------|
| Down at 24 hrs | A_65_P16141 | 0.57 | 0.037             |                | Intronic in U016966                                                |
| Down at 24 hrs | A_65_P18020 | 0.57 | 0.030 XM_148284.2 | AA960172       | P20-CGGBP homolog [Homo sapiens]                                   |
| Down at 24 hrs | A_65_P20553 | 0.57 | 0.017             |                | Intronic in U000192                                                |
| Down at 24 hrs | A_65_P16046 | 0.57 | 0.018 XM_132833.2 | LOC213895      | UNKNOWN                                                            |
| Down at 24 hrs | A_65_P16672 | 0.57 | 0.040 XM_134938.2 | Grin1a         | PUTATIVE IONOTROPIC GLUTAMATE RECEPTOR GLURR-F11694B (FRAGMENT) h  |
| Down at 24 hrs | A_65_P13460 | 0.57 | 0.023 NM_019666.1 | Nsap11-pending | Mus musculus NS1-associated protein 1-like (Nsap11-pending), mRNA  |
| Down at 24 hrs | A_65_P17459 | 0.57 | 0.029             | Shapy-pending  | Mus musculus RIKEN cDNA 5830420C20 gene (5830420C20Rik), mRNA      |
| Down at 24 hrs | A_65_P16195 | 0.57 | 0.025             | Pcyt1a         | Mus musculus phosphate cytidyltransferase 1, choline, alpha iso    |
| Down at 24 hrs | A_65_P12668 | 0.57 | 0.043 NM_144910.1 | MGC29037       | Mus musculus hypothetical protein MGC29037 (MGC29037), mRNA        |
| Down at 24 hrs | A_65_P14230 | 0.57 | 0.032 BC027515.1  | Rpl44          | Mus musculus ribosomal protein L44 (Rpl44), mRNA                   |
| Down at 24 hrs | A_65_P14685 | 0.57 | 0.007 XM_122472.1 | Hsp86-1        | UNKNOWN                                                            |
| Down at 24 hrs | A_65_P15900 | 0.57 | 0.018             | Cn1a           | cytosolic 5 nucleotidase, type 1A                                  |
| Down at 24 hrs | A_65_P12957 | 0.57 | 0.026 BC026823.1  | Pdcc6ip        | Mus musculus programmed cell death 6 interacting protein (Pdcc6ip) |
| Down at 24 hrs | A_65_P15682 | 0.57 | 0.017             |                | Intronic in U043112                                                |
| Down at 24 hrs | A_65_P12038 | 0.57 | 0.021 AK004407.1  | 1110068E21Rik  | Mus musculus RIKEN cDNA 4933411K20 gene (4933411K20Rik), mRNA      |
| Down at 24 hrs | A_65_P14592 | 0.57 | 0.015             | Nup155         | Mus musculus nucleoporin 155 (Nup155), mRNA                        |
| Down at 24 hrs | A_65_P17052 | 0.57 | 0.038             | AU022048       | Possibly wrong strand                                              |
| Down at 24 hrs | A_65_P17519 | 0.57 | 0.008             |                | UNKNOWN                                                            |
| Down at 24 hrs | A_65_P13220 | 0.57 | 0.032 BC019161.1  | Ppp2cb         | Mus musculus protein phosphatase 2a, catalytic subunit, beta isof  |
| Down at 24 hrs | A_65_P15906 | 0.57 | 0.004 NM_026570.1 | Gas41-pending  | Mus musculus glioma-amplified sequence-41 (Gas41-pending), mRNA    |
| Down at 24 hrs | A_65_P16215 | 0.57 | 0.044 XM_135248.1 | Scp2-ps2       | Mus musculus sterol carrier protein 2, pseudogene 2 (Scp2-ps2)     |
| Down at 24 hrs | A_65_P10429 | 0.57 | 0.003 XM_132310.1 | 2410015A15Rik  | ATP DEPENDENT RNA                                                  |
| Down at 24 hrs | A_65_P12800 | 0.57 | 0.025             |                | Intronic in U009738                                                |
| Down at 24 hrs | A_65_P13714 | 0.56 | 0.048 XM_131339.1 | Fbxl10         | REPEAT-SEQUENCE                                                    |
| Down at 24 hrs | A_65_P18198 | 0.56 | 0.004 XM_134191.1 | Fbxo8          | f-box only protein 8                                               |
| Down at 24 hrs | A_65_P12824 | 0.56 | 0.046             |                | UNKNOWN                                                            |
| Down at 24 hrs | A_65_P13087 | 0.56 | 0.006 XM_126038.1 | BC024322       | similar to CDNA FLJ14164 FIS, CLONE NT2RP1000460, WEAKLY SIMILAR   |
| Down at 24 hrs | A_65_P16414 | 0.56 | 0.003             |                | UNKNOWN                                                            |
| Down at 24 hrs | A_65_P11144 | 0.56 | 0.004 NM_138668.1 | MGC7482        | Mus musculus hypothetical protein MGC7482 (MGC7482), mRNA          |
| Down at 24 hrs | A_65_P13329 | 0.56 | 0.047 NM_011495.1 | Stk18          | SMK/PLK-AKIN KINASE (PROTEIN KINASE SMK/PLK-AKIN) (EC 2.7.1.-). [  |
| Down at 24 hrs | A_65_P15908 | 0.56 | 0.009 NM_133854.1 | Snap25bp       | Mus musculus synaptosomal-associated protein, 25 kDa, binding pro  |
| Down at 24 hrs | A_65_P18212 | 0.56 | 0.008             |                | UNKNOWN                                                            |
| Down at 24 hrs | A_65_P03089 | 0.56 | 0.015 XM_129344.1 | Eif3           | Mus musculus eukaryotic translation initiation factor 3 (Eif3), m  |
| Down at 24 hrs | A_65_P03901 | 0.56 | 0.028 NM_013470.1 | Anxa3          | Mus musculus annexin A3 (Anxa3), mRNA                              |
| Down at 24 hrs | A_65_P13756 | 0.56 | 0.041 NM_144536.1 | 1190005B03Rik  | Mus musculus RIKEN cDNA 1190005B03 gene (1190005B03Rik), mRNA      |
| Down at 24 hrs | A_65_P13987 | 0.56 | 0.040 AK013822.1  | 2900084O13Rik  | Intronic in U038160                                                |
| Down at 24 hrs | A_65_P14400 | 0.56 | 0.048             |                | UNKNOWN                                                            |
| Down at 24 hrs | A_65_P14580 | 0.56 | 0.041 XM_146981.1 |                | hypothetical Tropomyosin/Glutamic acid-rich region containing pro  |
| Down at 24 hrs | A_65_P17910 | 0.56 | 0.028 NM_172697.1 | 2410002M20     | CDNA FIS, CLONE , WEAKLY SIMILAR TO SPLICING FACTOR, ARGININE/SER  |
| Down at 24 hrs | A_65_P19452 | 0.56 | 0.022 NM_020474.2 | Galnt1         | Mus musculus UDP-N-acetyl-alpha-D-galactosamine:polypeptide N-ace  |
| Down at 24 hrs | A_65_P13482 | 0.56 | 0.031 NM_027927.1 | 1110020M19Rik  | Mus musculus RIKEN cDNA 1110020M19 gene (1110020M19Rik), mRNA      |
| Down at 24 hrs | A_65_P14786 | 0.56 | 0.038             | AU022096       | UNKNOWN                                                            |
| Down at 24 hrs | A_65_P14881 | 0.56 | 0.028 XM_128857.1 | 4631422C13Rik  | weakly similar to KIAA1569 PROTEIN (FRAGMENT) [Homo sapiens]       |
| Down at 24 hrs | A_65_P18299 | 0.56 | 0.030 NM_009342.1 | Tctex1         | Mus musculus t-complex testis expressed 1 (Tctex1), mRNA           |
| Down at 24 hrs | A_65_P13955 | 0.56 | 0.012             |                | UNKNOWN                                                            |
| Down at 24 hrs | A_65_P12114 | 0.56 | 0.031 NM_010048.1 | Dgcr2          | Mus musculus DiGeorge syndrome critical region gene 2 (Dgcr2), mR  |
| Down at 24 hrs | A_65_P16975 | 0.56 | 0.014 AF257711.1  | Slc15a2        | Intronic in U037022                                                |
| Down at 24 hrs | A_65_P19267 | 0.56 | 0.003             |                | Intronic in U012000                                                |
| Down at 24 hrs | A_65_P13862 | 0.56 | 0.002             |                | Intronic in U040768                                                |
| Down at 24 hrs | A_65_P19825 | 0.56 | 0.034             | 2700029M09Rik  | Mus musculus RIKEN cDNA 2700029M09 gene (2700029M09Rik), mRNA      |
| Down at 24 hrs | A_65_P09384 | 0.56 | 0.014 XM_132735.1 |                | hypothetical RhoGAP domain/Pleckstrin homology (PH) domain contai  |
| Down at 24 hrs | A_65_P13825 | 0.56 | 0.031 XM_131298.1 | Cals1          | CARBONIC ANHYDRASE-RELATED PROTEIN (CARP) (CA-VIII). [Source:SWIS  |
| Down at 24 hrs | A_65_P16783 | 0.56 | 0.005 NM_012034.1 | Tpsg1          | Mus musculus calcium channel, voltage-dependent, T type, alpha 1H  |
| Down at 24 hrs | A_65_P17343 | 0.56 | 0.039             |                | REPEAT-SEQUENCE                                                    |
| Down at 24 hrs | A_65_P17366 | 0.56 | 0.042 NM_026632.1 | C330026P08Rik  | Mus musculus RIKEN cDNA C330026P08 gene (C330026P08Rik), mRNA      |
| Down at 24 hrs | A_65_P20409 | 0.56 | 0.024 NM_011130.1 | Polb           | Mus musculus polymerase (DNA directed), beta (Polb), mRNA          |
| Down at 24 hrs | A_65_P20565 | 0.56 | 0.034 NM_026654.1 | 4930584N22Rik  | Mus musculus RIKEN cDNA 4930584N22 gene (4930584N22Rik), mRNA      |
| Down at 24 hrs | A_65_P10799 | 0.55 | 0.027 BC016884.1  | Frzb           | Mus musculus frizzled-related protein (Frzb), mRNA                 |

|                |             |      |                   |               |                                                                   |
|----------------|-------------|------|-------------------|---------------|-------------------------------------------------------------------|
| Down at 24 hrs | A_65_P14567 | 0.55 | 0.045 XM_130306.2 | Sp3           | TRANSCRIPTION FACTOR SP3 (FRAGMENT). [Source:SPTREMBL;Acc:O70494] |
| Down at 24 hrs | A_65_P15636 | 0.55 | 0.023 NM_021589.1 | C80751        | Possibly wrong strand                                             |
| Down at 24 hrs | A_65_P17256 | 0.55 | 0.021 AK017754.1  | 5730507C05Rik | SPLICING FACTOR, ARGININE/SERINE RICH PRE MRNA SPLICING FACTOR    |
| Down at 24 hrs | A_65_P08067 | 0.55 | 0.008 NM_023785.1 | Pbbp          | Mus musculus pro-platelet basic protein (Pbbp), mRNA              |
| Down at 24 hrs | A_65_P14480 | 0.55 | 0.005 XM_181325.1 | 2310063P06Rik | Mus musculus RIKEN cDNA 2310063P06 gene (2310063P06Rik), mRNA     |
| Down at 24 hrs | A_65_P16577 | 0.55 | 0.013 BC038342.1  | BC025641      | Mus musculus cDNA sequence BC025641 (BC025641), mRNA              |
| Down at 24 hrs | A_65_P15161 | 0.55 | 0.022             |               | UNKNOWN                                                           |
| Down at 24 hrs | A_65_P15385 | 0.55 | 0.042             |               | Intronic in U034474                                               |
| Down at 24 hrs | A_65_P15663 | 0.55 | 0.007             |               | UNKNOWN                                                           |
| Down at 24 hrs | A_65_P16680 | 0.55 | 0.021 NM_004776.2 |               | UNKNOWN                                                           |
| Down at 24 hrs | A_65_P18276 | 0.55 | 0.019 AK018351.1  |               | UNKNOWN                                                           |
| Down at 24 hrs | A_65_P11702 | 0.55 | 0.027             |               | UNKNOWN                                                           |
| Down at 24 hrs | A_65_P11871 | 0.55 | 0.026 XM_144499.1 |               | Similar to: Mus musculus similar to hypothetical protein FLJ38281 |
| Down at 24 hrs | A_65_P17358 | 0.55 | 0.043             | Gadd45g       | UNKNOWN                                                           |
| Down at 24 hrs | A_65_P17718 | 0.55 | 0.034 XM_135146.2 | KIAA0678      | Mus musculus similar to ebiP4417 [Anopheles gambiae str. PEST] (L |
| Down at 24 hrs | A_65_P14858 | 0.55 | 0.037 XM_133074.1 | 2900060J04Rik | homeodomain interacting protein kinase 2                          |
| Down at 24 hrs | A_65_P09530 | 0.55 | 0.012             |               | UNKNOWN                                                           |
| Down at 24 hrs | A_65_P11244 | 0.55 | 0.013             |               | Intronic in U035489                                               |
| Down at 24 hrs | A_65_P14687 | 0.55 | 0.005 AK009939.1  | 2310056B04Rik | Intronic in U022020                                               |
| Down at 24 hrs | A_65_P17559 | 0.55 | 0.024 XM_127327.2 | Nup153        | weakly similar to NUCLEOPORIN NUP153 (FRAGMENT) [Xenopus laevis]  |
| Down at 24 hrs | A_65_P15237 | 0.55 | 0.019 BC021824.1  | Ubqln2        | Mus musculus ubiquilin 2 (Ubqln2), mRNA                           |
| Down at 24 hrs | A_65_P11010 | 0.55 | 0.026             |               | UNKNOWN                                                           |
| Down at 24 hrs | A_65_P13441 | 0.55 | 0.013 M11456.1    | Tcrb-J        | T-CELL RECEPTOR BETA CHAIN V REGION C5 PRECURSOR (FRAGMENT). [Sou |
| Down at 24 hrs | A_65_P14360 | 0.55 | 0.001             | D2Erd691e     | UNKNOWN                                                           |
| Down at 24 hrs | A_65_P17359 | 0.55 | 0.036 NM_003590.1 | Cul3          | UNKNOWN                                                           |
| Down at 24 hrs | A_65_P19648 | 0.55 | 0.047 XM_127278.1 | 2310047M15Rik | Mus musculus RIKEN cDNA 2310047M15 gene (2310047M15Rik), mRNA     |
| Down at 24 hrs | A_65_P13587 | 0.54 | 0.032 NM_026179.1 | 1300003D03Rik | Mus musculus RIKEN cDNA 1300003D03 gene (1300003D03Rik), mRNA     |
| Down at 24 hrs | A_65_P18554 | 0.54 | 0.029 NM_011239.1 | Ranbp1        | Mus musculus RAN binding protein 1 (Ranbp1), mRNA                 |
| Down at 24 hrs | A_65_P14992 | 0.54 | 0.006             |               | UNKNOWN                                                           |
| Down at 24 hrs | A_65_P16416 | 0.54 | 0.002 NM_025935.1 | 2610009C09Rik | Mus musculus RIKEN cDNA 2610009C09 gene (2610009C09Rik), mRNA     |
| Down at 24 hrs | A_65_P17970 | 0.54 | 0.021 NM_008211.1 | H3f3b         | Mus musculus H3 histone, family 3B (H3f3b), mRNA                  |
| Down at 24 hrs | A_65_P11793 | 0.54 | 0.040 BC032993.1  |               | RAS GTPASE ACTIVATING LIKE PROTEIN                                |
| Down at 24 hrs | A_65_P16226 | 0.54 | 0.001 XM_129271.1 | 1200003G01Rik | hypothetical NHL repeat containing protein                        |
| Down at 24 hrs | A_65_P16795 | 0.54 | 0.041 XM_136136.2 | Piga          | PHOSPHATIDYLINOSITOL GLYCAN, CLASS A (PIG-A PROTEIN). [Source:SPT |
| Down at 24 hrs | A_65_P18184 | 0.54 | 0.023 XM_149992.1 |               | UNKNOWN                                                           |
| Down at 24 hrs | A_65_P13125 | 0.54 | 0.009             | 4121402D02Rik | Mus musculus RIKEN cDNA 4121402D02 gene (4121402D02Rik), mRNA     |
| Down at 24 hrs | A_65_P15379 | 0.54 | 0.045             | C77575        | UNKNOWN                                                           |
| Down at 24 hrs | A_65_P17170 | 0.54 | 0.047 NM_133701.1 | 2610031L17Rik | Mus musculus RIKEN cDNA 1190003A07 gene (1190003A07Rik), mRNA     |
| Down at 24 hrs | A_65_P20321 | 0.54 | 0.031 NM_008980.1 |               | ADULT MALE TESTIS CDNA, RIKEN FULL-LENGTH ENRICHED LIBRARY, CLONE |
| Down at 24 hrs | A_65_P16022 | 0.54 | 0.033             |               | UNKNOWN                                                           |
| Down at 24 hrs | A_65_P16786 | 0.54 | 0.023 BC024840.1  | 1700011I11Rik | Mus musculus, clone IMAGE:5361571, mRNA, partial cds              |
| Down at 24 hrs | A_65_P01167 | 0.54 | 0.014 NM_021788.1 | Sap30         | Mus musculus sin3 associated polypeptide, 30kD (Sap30), mRNA      |
| Down at 24 hrs | A_65_P12975 | 0.54 | 0.024 BC038279.1  |               | BINDING                                                           |
| Down at 24 hrs | A_65_P18415 | 0.54 | 0.013 BC010212.1  | Fbxo3         | Mus musculus f-box only protein 3 (Fbxo3), mRNA                   |
| Down at 24 hrs | A_65_P13780 | 0.54 | 0.002             | D3Wsu106e     | Intronic in U003664                                               |
| Down at 24 hrs | A_65_P16213 | 0.54 | 0.012             |               | UNKNOWN                                                           |
| Down at 24 hrs | A_65_P13750 | 0.53 | 0.042             | Zfp26         | UNKNOWN                                                           |
| Down at 24 hrs | A_65_P16807 | 0.53 | 0.038 NM_013663.2 | Sfrs3         | Mus musculus splicing factor, arginine/serine-rich 3 (SRp20) (Sfr |
| Down at 24 hrs | A_65_P19172 | 0.53 | 0.046 BC025047.1  | 5730444A13Rik | Mus musculus hypothetical protein MGC38421 (MGC38421), mRNA       |
| Down at 24 hrs | A_65_P13988 | 0.53 | 0.036             |               | Intronic in U016471                                               |
| Down at 24 hrs | A_65_P16288 | 0.53 | 0.020 XM_127183.1 | 4932413M22    | GUANINE NUCLEOTIDE EXCHANGE FACTOR                                |
| Down at 24 hrs | A_65_P19423 | 0.53 | 0.030             |               | Intronic in U042479                                               |
| Down at 24 hrs | A_65_P13172 | 0.53 | 0.026 NM_133978.1 | AI481279      | UNKNOWN                                                           |
| Down at 24 hrs | A_65_P15271 | 0.53 | 0.001 NM_009035.1 | Rbpsuh        | Mus musculus recombining binding protein suppressor of hairless ( |
| Down at 24 hrs | A_65_P16015 | 0.53 | 0.037 AK004115.1  | 1110035J23Rik | Mus musculus casein kinase II, alpha 2, polypeptide (Csnk2a2), mR |
| Down at 24 hrs | A_65_P17162 | 0.53 | 0.001 NM_007617.1 | Cav3          | Mus musculus caveolin 3 (Cav3), mRNA                              |
| Down at 24 hrs | A_65_P17861 | 0.53 | 0.037             | Nmt2          | Mus musculus N-methyltransferase 2 (Nmt2), mRNA                   |
| Down at 24 hrs | A_65_P09850 | 0.53 | 0.038 AK015104.1  | 4930406D14Rik | Intronic in U033231                                               |

|                |             |      |                   |               |                                                                   |
|----------------|-------------|------|-------------------|---------------|-------------------------------------------------------------------|
| Down at 24 hrs | A_65_P11856 | 0.53 | 0.029             |               | Intronic in U030942                                               |
| Down at 24 hrs | A_65_P15561 | 0.53 | 0.006             | Hdh           | HUNTINGTIN (HUNTINGTONS DISEASE PROTEIN HOMOLOG) (HD PROTEIN). [S |
| Down at 24 hrs | A_65_P15707 | 0.53 | 0.035 XM_123503.1 | Rassf5        | novel ras effector 1                                              |
| Down at 24 hrs | A_65_P17822 | 0.53 | 0.028             |               | UNKNOWN                                                           |
| Down at 24 hrs | A_65_P18331 | 0.53 | 0.035             |               | Intronic in U043257                                               |
| Down at 24 hrs | A_65_P17512 | 0.53 | 0.029 NM_015782.1 | Snrpa         | Mus musculus small nuclear ribonucleoprotein polypeptide A (Snrpa |
| Down at 24 hrs | A_65_P13478 | 0.53 | 0.023             | C76434        | Intronic in U024168                                               |
| Down at 24 hrs | A_65_P12884 | 0.53 | 0.013 XM_133044.1 | D6Erd313e     | NUCLEAR TRANSPORT RECEPTOR homolog [Homo sapiens]                 |
| Down at 24 hrs | A_65_P13589 | 0.53 | 0.027             |               | UNKNOWN                                                           |
| Down at 24 hrs | A_65_P17458 | 0.53 | 0.046             | Map2k1ip1     | Intronic in U014167                                               |
| Down at 24 hrs | A_65_P17631 | 0.53 | 0.001             |               | Intronic in U015066                                               |
| Down at 24 hrs | A_65_P13653 | 0.53 | 0.031             |               | Similar to: Mus musculus 0 day neonate lung cDNA, RIKEN full-leng |
| Down at 24 hrs | A_65_P13859 | 0.53 | 0.011             |               | Intronic in U002206                                               |
| Down at 24 hrs | A_65_P16021 | 0.53 | 0.035             |               | UNKNOWN                                                           |
| Down at 24 hrs | A_65_P11782 | 0.52 | 0.024             |               | UNKNOWN                                                           |
| Down at 24 hrs | A_65_P14747 | 0.52 | 0.031 XM_125878.2 | LOC215449     | ras-related protein rap1B {Homo sapiens}                          |
| Down at 24 hrs | A_65_P20672 | 0.52 | 0.012 NM_009652.1 | Akt1          | Mus musculus thymoma viral proto-oncogene 1 (Akt1), mRNA          |
| Down at 24 hrs | A_65_P14053 | 0.52 | 0.002 XM_145139.1 |               | Intronic in U006507                                               |
| Down at 24 hrs | A_65_P13602 | 0.52 | 0.018             |               | Intronic in U027658                                               |
| Down at 24 hrs | A_65_P17153 | 0.52 | 0.045             |               | Intronic in U043749                                               |
| Down at 24 hrs | A_65_P18319 | 0.52 | 0.047 XM_139904.1 |               | Mus musculus similar to golgin-160 [Homo sapiens] (LOC207209), mR |
| Down at 24 hrs | A_65_P19154 | 0.52 | 0.004             |               | UNKNOWN                                                           |
| Down at 24 hrs | A_65_P12281 | 0.52 | 0.046             |               | UNKNOWN                                                           |
| Down at 24 hrs | A_65_P12692 | 0.52 | 0.004 NM_023873.2 | C030018L16Rik | Mus musculus RIKEN cDNA C030018L16 gene (C030018L16Rik), mRNA     |
| Down at 24 hrs | A_65_P17752 | 0.52 | 0.028 XM_133552.2 | 2410008B13Rik | hypothetical G-protein beta WD-40 repeats containing protein      |
| Down at 24 hrs | A_65_P03013 | 0.52 | 0.007 XM_130305.2 | Tfpi          | TISSUE FACTOR PATHWAY INHIBITOR PRECURSOR (TFPI) (LIPOPROTEIN- AS |
| Down at 24 hrs | A_65_P16296 | 0.52 | 0.011             |               | UNKNOWN                                                           |
| Down at 24 hrs | A_65_P16305 | 0.52 | 0.017 XM_127336.1 | 2810012K13Rik | SECIS BINDING PROTEIN                                             |
| Down at 24 hrs | A_65_P17339 | 0.52 | 0.040 AF390896.1  | Nr6a1         | Mus musculus nuclear receptor subfamily 6, group A, member 1 (Nr6 |
| Down at 24 hrs | A_65_P13041 | 0.52 | 0.022 NM_053161.1 | Mrpl27        | Mus musculus mitochondrial ribosomal protein L27 (Mrpl27), mRNA   |
| Down at 24 hrs | A_65_P13926 | 0.52 | 0.049 NM_172308.1 | LOC270685     | C 1 TETRAHYDROFOLATE SYNTHASE, CYTOPLASMIC C1 THF SYNTHASE [INCLU |
| Down at 24 hrs | A_65_P15249 | 0.52 | 0.011 NM_021463.1 | Prps1         | Mus musculus phosphoribosyl pyrophosphate synthetase 1 (Prps1), m |
| Down at 24 hrs | A_65_P16246 | 0.52 | 0.017 NM_146115.1 | MGC7940       | Mus musculus hypothetical protein MGC7940 (MGC7940), mRNA         |
| Down at 24 hrs | A_65_P18132 | 0.52 | 0.015 XM_130985.1 | AW123087      | ARFAPTIN 1                                                        |
| Down at 24 hrs | A_65_P08753 | 0.52 | 0.029             |               | UNKNOWN                                                           |
| Down at 24 hrs | A_65_P13294 | 0.52 | 0.032 NM_021067.1 | 2810418N01Rik | HYPOTHETICAL PROTEIN KIAA0186 homolog [Homo sapiens]              |
| Down at 24 hrs | A_65_P15869 | 0.52 | 0.045             |               | UNKNOWN                                                           |
| Down at 24 hrs | A_65_P16979 | 0.52 | 0.048 BC008542.1  | Gosr1         | Mus musculus golgi SNAP receptor complex member 1 (Gosr1), mRNA   |
| Down at 24 hrs | A_65_P16988 | 0.52 | 0.050             |               | Intronic in U035132                                               |
| Down at 24 hrs | A_65_P18131 | 0.52 | 0.029             |               | UNKNOWN                                                           |
| Down at 24 hrs | A_65_P18334 | 0.52 | 0.048             |               | Intronic in U021889                                               |
| Down at 24 hrs | A_65_P19032 | 0.52 | 0.024 NM_008640.1 | Laptm4a       | Mus musculus lysosomal-associated protein transmembrane 4A (Laptm |
| Down at 24 hrs | A_65_P19057 | 0.52 | 0.013 NM_025391.1 | 1110017C15Rik | Mus musculus RIKEN cDNA 1110017C15 gene (1110017C15Rik), mRNA     |
| Down at 24 hrs | A_65_P11869 | 0.52 | 0.033 NM_013841.1 | Vps45         | Mus musculus vacuolar protein sorting 45 (yeast) (Vps45), mRNA    |
| Down at 24 hrs | A_65_P15995 | 0.52 | 0.007             |               | UNKNOWN                                                           |
| Down at 24 hrs | A_65_P16321 | 0.52 | 0.005 NM_133973.1 | Cog4          | Mus musculus component of oligomeric golgi complex 4 (Cog4), mRNA |
| Down at 24 hrs | A_65_P16362 | 0.52 | 0.036             | BB099155      | Mus musculus cartilage link protein 1 (Crl1), mRNA                |
| Down at 24 hrs | A_65_P11686 | 0.52 | 0.008             |               | UNKNOWN                                                           |
| Down at 24 hrs | A_65_P12537 | 0.52 | 0.003 NM_025433.1 | 1500016H10Rik | Mus musculus RIKEN cDNA 1500016H10 gene (1500016H10Rik), mRNA     |
| Down at 24 hrs | A_65_P14867 | 0.52 | 0.046 AK011437.1  | 2610017I09Rik | RIKEN cDNA 2610017I09 gene                                        |
| Down at 24 hrs | A_65_P15727 | 0.52 | 0.015             |               | Intronic in U005105                                               |
| Down at 24 hrs | A_65_P16333 | 0.52 | 0.049 NM_145484.1 | LOC224598     | Mus musculus similar to zinc finger protein 40 (LOC224598), mRNA  |
| Down at 24 hrs | A_65_P13691 | 0.51 | 0.028 U20619.1    | Kpna1         | Mus musculus karyopherin (importin) alpha 1 (Kpna1), mRNA         |
| Down at 24 hrs | A_65_P15272 | 0.51 | 0.043 NM_007557.1 | Bmp7          | Mus musculus bone morphogenetic protein 7 (Bmp7), mRNA            |
| Down at 24 hrs | A_65_P15752 | 0.51 | 0.046             | A1225768      | Mus musculus inhibitor of growth family, member 5 (Ing5), mRNA    |
| Down at 24 hrs | A_65_P17617 | 0.51 | 0.026 NM_018855.1 | Gas8          | Mus musculus growth arrest specific 11 (Gas11), mRNA              |
| Down at 24 hrs | A_65_P20120 | 0.51 | 0.035 NM_146188.1 | MGC25497      | Mus musculus hypothetical protein MGC25497 (MGC25497), mRNA       |
| Down at 24 hrs | A_65_P11471 | 0.51 | 0.027 NM_011858.1 | Odz4          | Mus musculus neuregulin 1 (Nrg1), mRNA                            |



|                |             |      |                   |               |                                                                   |
|----------------|-------------|------|-------------------|---------------|-------------------------------------------------------------------|
| Down at 24 hrs | A_65_P13373 | 0.51 | 0.036 XM_129981.2 | D330021B20    | hypothetical Phosphoglycerate mutase-like structure containing pr |
| Down at 24 hrs | A_65_P12674 | 0.51 | 0.021             | C77648        | Intronic in U032901                                               |
| Down at 24 hrs | A_65_P12989 | 0.51 | 0.025 NM_007950.1 | Ereg          | Mus musculus epiregulin (Ereg), mRNA                              |
| Down at 24 hrs | A_65_P13664 | 0.51 | 0.003             |               | UNKNOWN                                                           |
| Down at 24 hrs | A_65_P14004 | 0.51 | 0.001 XM_128631.1 | Plcl2         | PHOSPHOLIPASE C-L2. [Source:SPTREMBL;Acc:Q9QYG1]                  |
| Down at 24 hrs | A_65_P18041 | 0.51 | 0.049 NM_011816.1 | G3bp2-pending | Mus musculus Ras-GTPase-activating protein (GAP<120>) SH3-domain  |
| Down at 24 hrs | A_65_P16781 | 0.51 | 0.003 AK011480.1  | 2610020C11Rik | ZINC FINGER PROTEIN                                               |
| Down at 24 hrs | A_65_P13126 | 0.51 | 0.028 XM_149193.1 | AU019331      | Mus musculus expressed sequence AU019331 (AU019331), mRNA         |
| Down at 24 hrs | A_65_P13240 | 0.51 | 0.029             |               | UNKNOWN                                                           |
| Down at 24 hrs | A_65_P16260 | 0.51 | 0.014 NM_021564.1 | Fetub         | Mus musculus fetuin beta (Fetub), mRNA                            |
| Down at 24 hrs | A_65_P17561 | 0.51 | 0.008 NM_011666.1 | Ube1c         | Mus musculus ubiquitin-activating enzyme E1C (Ube1c), mRNA        |
| Down at 24 hrs | A_65_P18961 | 0.51 | 0.007 BC021596.1  | Cd160         | Mus musculus CD160 antigen (Cd160), mRNA                          |
| Down at 24 hrs | A_65_P12863 | 0.51 | 0.044 XM_135857.2 | 2700066J21Rik | Mus musculus RIKEN cDNA 2700066J21 gene (2700066J21Rik), mRNA     |
| Down at 24 hrs | A_65_P16867 | 0.51 | 0.027 XM_128899.1 | Ik            | IK cytokine                                                       |
| Down at 24 hrs | A_65_P18328 | 0.51 | 0.048 NM_033618.1 | Supt16h       | Mus musculus suppressor of Ty 16 homolog (S. cerevisiae) (Supt16h |
| Down at 24 hrs | A_65_P16286 | 0.50 | 0.035 NM_010945.1 | Nsmaf         | Mus musculus neutral sphingomyelinase (N-SMase) activation associ |
| Down at 24 hrs | A_65_P14045 | 0.50 | 0.012 XM_030175.3 | MGC12070      | Mus musculus hypothetical protein MGC12070 (MGC12070), mRNA       |
| Down at 24 hrs | A_65_P15770 | 0.50 | 0.041             |               | UNKNOWN                                                           |
| Down at 24 hrs | A_65_P14353 | 0.50 | 0.013 XM_149951.2 |               | Mus musculus LOC207342 (LOC207342), mRNA                          |
| Down at 24 hrs | A_65_P16788 | 0.50 | 0.008 NM_011802.1 | Clpx          | Mus musculus caseinolytic protease X (E.coli) (Clpx), mRNA        |
| Down at 24 hrs | A_65_P13846 | 0.50 | 0.038             | Klf3          | Mus musculus Kruppel-like factor 3 (basic) (Klf3), mRNA           |
| Down at 24 hrs | A_65_P14874 | 0.50 | 0.008             | MGC38548      | Intronic in U024238                                               |
| Down at 24 hrs | A_65_P15626 | 0.50 | 0.012 XM_131743.2 | ECE-1         | Similar to: Mus musculus similar to Endothelin-converting enzyme  |
| Down at 24 hrs | A_65_P16668 | 0.50 | 0.002 NM_011663.1 | U2af1-rs1     | Mus musculus U2 small nuclear ribonucleoprotein auxiliary factor  |
| Down at 24 hrs | A_65_P17937 | 0.50 | 0.050 NM_023735.1 | Actr3         | Mus musculus actin-related protein 3 homolog (yeast) (Actr3), mRN |
| Down at 24 hrs | A_65_P18289 | 0.50 | 0.003 NM_018785.1 | Fnbp3         | Mus musculus formin binding protein 3 (Fnbp3), mRNA               |
| Down at 24 hrs | A_65_P15089 | 0.50 | 0.041 AL049378.1  | AU021749      | IMPORTIN BETA 2 SUBUNIT KARYOPHERIN BETA 2 SUBUNIT TRANSPORTIN M9 |
| Down at 24 hrs | A_65_P16377 | 0.50 | 0.044             |               | Intronic in U042431                                               |
| Down at 24 hrs | A_65_P18323 | 0.50 | 0.042 AK011900.1  | 2610206D03Rik | Mus musculus coxsackievirus and adenovirus receptor (Cxadr), mRNA |
| Down at 24 hrs | A_65_P13665 | 0.50 | 0.016             |               | Intronic in U034226                                               |
| Down at 24 hrs | A_65_P15657 | 0.50 | 0.032             |               | REPEAT-SEQUENCE                                                   |
| Down at 24 hrs | A_65_P18338 | 0.50 | 0.049 AF081501.1  | Pphn          | UNKNOWN                                                           |
| Down at 24 hrs | A_65_P13937 | 0.50 | 0.008 XM_127005.1 | Pole2         | DNA POLYMERASE EPSILON SUBUNIT B (EC 2.7.7.7) (DNA POLYMERASE II  |
| Down at 24 hrs | A_65_P18610 | 0.50 | 0.024             |               | Intronic in U038317                                               |
| Down at 24 hrs | A_65_P12033 | 0.50 | 0.010 XM_131409.2 | 2010203O07Rik | BA16L21.2.1 (NOVEL DNAJ DOMAIN PROTEIN SIMILAR TO DROSOPHILA, C.  |
| Down at 24 hrs | A_65_P14240 | 0.50 | 0.014 NM_007987.1 | Tnfrsf6       | Mus musculus tumor necrosis factor receptor superfamily, member 6 |
| Down at 24 hrs | A_65_P15544 | 0.50 | 0.012 AK007556.1  | 1810020C02Rik | Mus musculus lysosomal apyrase-like 2 (Lysal2), mRNA              |
| Down at 24 hrs | A_65_P16742 | 0.50 | 0.044 NM_010310.1 | Gnas          | Mus musculus GNAS (guanine nucleotide binding protein, alpha stim |
| Down at 24 hrs | A_65_P18376 | 0.50 | 0.026 BC023966.1  | 1600019D15Rik | DB83                                                              |
| Down at 24 hrs | A_65_P18897 | 0.50 | 0.029             |               | Intronic in U029233                                               |
| Down at 24 hrs | A_65_P19238 | 0.50 | 0.046             |               | UNKNOWN                                                           |
| Down at 24 hrs | A_65_P10634 | 0.50 | 0.030             |               | UNKNOWN                                                           |
| Down at 24 hrs | A_65_P14501 | 0.50 | 0.029 NM_009186.1 | Silg41        | Mus musculus silica-induced gene 41 (Silg41), mRNA                |
| Down at 24 hrs | A_65_P15298 | 0.50 | 0.022             |               | UNKNOWN                                                           |
| Down at 24 hrs | A_65_P16077 | 0.50 | 0.041 NM_024478.1 | Grpel1        | Mus musculus GrpE-like 1, mitochondrial (Grpel1), mRNA            |
| Down at 24 hrs | A_65_P15668 | 0.49 | 0.013 AJ296650.1  | Orc3l         | Mus musculus RIKEN cDNA 2700059D21 gene (2700059D21Rik), mRNA     |
| Down at 24 hrs | A_65_P17088 | 0.49 | 0.041 NM_025932.1 | Syap1         | Mus musculus synapse associated protein 1 (Syap1), mRNA           |
| Down at 24 hrs | A_65_P16114 | 0.49 | 0.031             |               | Intronic in U001292                                               |
| Down at 24 hrs | A_65_P18207 | 0.49 | 0.001             | 2410055N02Rik | Mus musculus ELAV (embryonic lethal, abnormal vision, Drosophila) |
| Down at 24 hrs | A_65_P20276 | 0.49 | 0.030 BC006759.1  | Lnk           | Mus musculus linker of T-cell receptor pathways (Lnk), mRNA       |
| Down at 24 hrs | A_65_P15924 | 0.49 | 0.002 AF070606.1  | 2810442I22Rik | PLASMA MEMBRANE CALCIUM TRANSPORTING ATPASE EC 3.6.3.8 PLASMA MEM |
| Down at 24 hrs | A_65_P15943 | 0.49 | 0.007             |               | Intronic in U013809                                               |
| Down at 24 hrs | A_65_P16420 | 0.49 | 0.045 NM_009502.2 | Vcl           | Mus musculus vinculin (Vcl), mRNA                                 |
| Down at 24 hrs | A_65_P17463 | 0.49 | 0.029             |               | UNKNOWN                                                           |
| Down at 24 hrs | A_65_P14432 | 0.49 | 0.046 XM_131928.2 | LOC231051     | MLL3-LIKE PROTEIN (FRAGMENT). [Source:SPTREMBL;Acc:Q923H5]        |
| Down at 24 hrs | A_65_P17079 | 0.49 | 0.042             |               | Intronic in U035212                                               |
| Down at 24 hrs | A_65_P14113 | 0.49 | 0.035 NM_023042.1 | Recql         | Mus musculus RecQ protein-like (Recql), mRNA                      |
| Down at 24 hrs | A_65_P16945 | 0.49 | 0.009 BC003990.1  | G3bp2-pending | UNKNOWN                                                           |

|                |             |      |       |             |                     |
|----------------|-------------|------|-------|-------------|---------------------|
| Down at 24 hrs | A_65_P17646 | 0.49 | 0.018 |             | UNKNOWN             |
| Down at 24 hrs | A_65_P18040 | 0.49 | 0.008 |             | REPEAT-SEQUENCE     |
| Down at 24 hrs | A_65_P19180 | 0.49 | 0.004 |             | Intronic in U014142 |
| Down at 24 hrs | A_65_P10973 | 0.49 | 0.030 | XM_128906.1 | 9130427A09Rik       |
| Down at 24 hrs | A_65_P13649 | 0.49 | 0.035 | NM_011992.1 | Rcn2                |
| Down at 24 hrs | A_65_P15753 | 0.49 | 0.024 | XM_177065.1 | A1536456            |
| Down at 24 hrs | A_65_P16618 | 0.49 | 0.014 | NM_010918.1 | Nktr                |
| Down at 24 hrs | A_65_P08942 | 0.49 | 0.041 | XM_176920.1 | Tkt                 |
| Down at 24 hrs | A_65_P12902 | 0.49 | 0.008 | NM_024172.1 | 1500019G21Rik       |
| Down at 24 hrs | A_65_P13515 | 0.49 | 0.040 | NM_009412.1 | Tpd52               |
| Down at 24 hrs | A_65_P13827 | 0.49 | 0.003 | BC031706.1  | 4930451A13Rik       |
| Down at 24 hrs | A_65_P14726 | 0.49 | 0.031 |             | UNKNOWN             |
| Down at 24 hrs | A_65_P17544 | 0.49 | 0.038 | XM_153088.1 | C79259              |
| Down at 24 hrs | A_65_P13543 | 0.49 | 0.037 |             | AW047063            |
| Down at 24 hrs | A_65_P14630 | 0.49 | 0.007 | BC001987.1  | Tfam                |
| Down at 24 hrs | A_65_P16395 | 0.49 | 0.014 | NM_009196.1 | Slc16a1             |
| Down at 24 hrs | A_65_P18806 | 0.49 | 0.013 |             |                     |
| Down at 24 hrs | A_65_P08403 | 0.48 | 0.016 |             |                     |
| Down at 24 hrs | A_65_P19606 | 0.48 | 0.041 |             |                     |
| Down at 24 hrs | A_65_P05004 | 0.48 | 0.029 | NM_010880.1 | Ncl                 |
| Down at 24 hrs | A_65_P12156 | 0.48 | 0.001 |             | C79042              |
| Down at 24 hrs | A_65_P17523 | 0.48 | 0.017 |             | AU021933            |
| Down at 24 hrs | A_65_P14329 | 0.48 | 0.035 | XM_124490.1 | Esg1                |
| Down at 24 hrs | A_65_P17449 | 0.48 | 0.039 |             | 6720469I21Rik       |
| Down at 24 hrs | A_65_P13935 | 0.48 | 0.023 | BC013562.1  | Gabpa               |
| Down at 24 hrs | A_65_P18314 | 0.48 | 0.006 |             |                     |
| Down at 24 hrs | A_65_P11493 | 0.48 | 0.020 |             | Ncor1               |
| Down at 24 hrs | A_65_P13006 | 0.48 | 0.020 |             | A1616248            |
| Down at 24 hrs | A_65_P13448 | 0.48 | 0.001 |             |                     |
| Down at 24 hrs | A_65_P13655 | 0.48 | 0.012 | AL832198.1  | DXErtD793e          |
| Down at 24 hrs | A_65_P18303 | 0.48 | 0.033 | NM_172404.1 | 2010009K05Rik       |
| Down at 24 hrs | A_65_P12015 | 0.48 | 0.028 |             | D4ErtD179e          |
| Down at 24 hrs | A_65_P14028 | 0.48 | 0.034 |             |                     |
| Down at 24 hrs | A_65_P16349 | 0.48 | 0.031 |             |                     |
| Down at 24 hrs | A_65_P18549 | 0.48 | 0.045 | NM_015829.1 | Slc25a13            |
| Down at 24 hrs | A_65_P12885 | 0.48 | 0.009 |             |                     |
| Down at 24 hrs | A_65_P14222 | 0.48 | 0.039 | AC007057.3  |                     |
| Down at 24 hrs | A_65_P16761 | 0.48 | 0.004 | NM_144514.1 | Murr1               |
| Down at 24 hrs | A_65_P17666 | 0.48 | 0.007 |             |                     |
| Down at 24 hrs | A_65_P12200 | 0.48 | 0.023 | XM_133037.1 | LOC232679           |
| Down at 24 hrs | A_65_P16369 | 0.48 | 0.029 |             |                     |
| Down at 24 hrs | A_65_P14902 | 0.48 | 0.007 | NM_147025.1 | MOR135-1            |
| Down at 24 hrs | A_65_P11868 | 0.47 | 0.030 |             | AW123847            |
| Down at 24 hrs | A_65_P14403 | 0.47 | 0.015 |             | 1300013G12Rik       |
| Down at 24 hrs | A_65_P11290 | 0.47 | 0.031 | NM_007422.1 | Adss2               |
| Down at 24 hrs | A_65_P13191 | 0.47 | 0.001 |             |                     |
| Down at 24 hrs | A_65_P14431 | 0.47 | 0.041 |             |                     |
| Down at 24 hrs | A_65_P14599 | 0.47 | 0.003 | XM_050988.2 | 3110023F06Rik       |
| Down at 24 hrs | A_65_P18352 | 0.47 | 0.041 |             |                     |
| Down at 24 hrs | A_65_P14670 | 0.47 | 0.031 | BC013765.1  | Pum2                |
| Down at 24 hrs | A_65_P15518 | 0.47 | 0.039 |             | Arfgap1             |
| Down at 24 hrs | A_65_P15834 | 0.47 | 0.012 |             |                     |
| Down at 24 hrs | A_65_P14044 | 0.47 | 0.025 |             | Zfp106              |
| Down at 24 hrs | A_65_P10631 | 0.47 | 0.014 | NM_010166.1 | Eya3                |
| Down at 24 hrs | A_65_P12671 | 0.47 | 0.046 | BC022221.1  | AA939927            |
| Down at 24 hrs | A_65_P16511 | 0.47 | 0.025 |             |                     |
| Down at 24 hrs | A_65_P14414 | 0.47 | 0.034 | XM_126932.1 | 1700020O03Rik       |
| Down at 24 hrs | A_65_P16155 | 0.47 | 0.025 | NM_019685.1 | Ruvbl1              |

|                |             |      |                   |               |                                                                   |
|----------------|-------------|------|-------------------|---------------|-------------------------------------------------------------------|
| Down at 24 hrs | A_65_P19249 | 0.47 | 0.041 XM_129803.1 | 1600023E10Rik | Similar to: Mus musculus RIKEN cDNA 1600023E10 gene (1600023E10Ri |
| Down at 24 hrs | A_65_P12964 | 0.47 | 0.043 NM_025968.1 | 2510002C21Rik | Mus musculus RIKEN cDNA 2510002C21 gene (2510002C21Rik), mRNA     |
| Down at 24 hrs | A_65_P14139 | 0.47 | 0.000 XM_130476.2 |               | HYPOTHALAMUS PROTEIN HT013                                        |
| Down at 24 hrs | A_65_P14619 | 0.47 | 0.038 BC016000.1  |               | SIMILAR TO ZINC FINGER PROTEIN 281. [Source:SPTREMBL;Acc:Q99L15]  |
| Down at 24 hrs | A_65_P16510 | 0.47 | 0.023             |               | UNKNOWN                                                           |
| Down at 24 hrs | A_65_P13564 | 0.47 | 0.038 NM_019797.1 | Trip4         | Mus musculus thyroid hormone receptor interactor 4 (Trip4), mRNA  |
| Down at 24 hrs | A_65_P13683 | 0.47 | 0.024 AL833403.1  |               | Intronic in U021359                                               |
| Down at 24 hrs | A_65_P14951 | 0.47 | 0.041 BC035536.1  | AI851073      | SIGNAL TRANSDUCTION PROTEIN CBL SH3 BINDING PROTEIN CBL           |
| Down at 24 hrs | A_65_P15552 | 0.47 | 0.019 XM_132038.1 | Stim2         | UNKNOWN                                                           |
| Down at 24 hrs | A_65_P17552 | 0.47 | 0.004             |               | Intronic in U024236                                               |
| Down at 24 hrs | A_65_P18513 | 0.47 | 0.041 NM_028091.1 | 2610001M19Rik | Mus musculus RIKEN cDNA 2610001M19 gene (2610001M19Rik), mRNA     |
| Down at 24 hrs | A_65_P19042 | 0.47 | 0.034 XM_176910.1 | 2310050N11Rik | PUTATIVE ALPHA MANNOSIDASE EC 3.2.-.-                             |
| Down at 24 hrs | A_65_P14377 | 0.46 | 0.012 BC033459.1  | Numb          | Mus musculus numb gene homolog (Drosophila) (Numb), mRNA          |
| Down at 24 hrs | A_65_P14863 | 0.46 | 0.017 XM_129507.1 | Rnf2          | POLYCOMB-M33 INTERACTING PROTEIN RING1B (FRAGMENT). [Source:SPTRE |
| Down at 24 hrs | A_65_P10512 | 0.46 | 0.042             | AI480666      | Mus musculus zinc finger protein 148 (Zfp148), mRNA               |
| Down at 24 hrs | A_65_P16732 | 0.46 | 0.017 XM_131967.1 | Slc4a1ap      | solute carrier family 4 (anion exchanger), member 1, adaptor prot |
| Down at 24 hrs | A_65_P17656 | 0.46 | 0.031             |               | Intronic in U038389                                               |
| Down at 24 hrs | A_65_P10494 | 0.46 | 0.007             |               | UNKNOWN                                                           |
| Down at 24 hrs | A_65_P17652 | 0.46 | 0.024             | Tsp10         | Mus musculus tumor suppressor region 10 (Tsp10-pending), mRNA     |
| Down at 24 hrs | A_65_P18208 | 0.46 | 0.004             |               | UNKNOWN                                                           |
| Down at 24 hrs | A_65_P14037 | 0.46 | 0.002 NM_029790.1 | 0610027B03Rik | Mus musculus RIKEN cDNA 0610027B03 gene (0610027B03Rik), mRNA     |
| Down at 24 hrs | A_65_P17096 | 0.46 | 0.007             |               | Intronic in U039135                                               |
| Down at 24 hrs | A_65_P19554 | 0.46 | 0.030             |               | UNKNOWN                                                           |
| Down at 24 hrs | A_65_P15796 | 0.46 | 0.045 NM_172730.1 | C130022K22    | HYPOTHETICAL 42.9 KDA PROTEIN homolog [Homo sapiens]              |
| Down at 24 hrs | A_65_P16866 | 0.46 | 0.038 NM_009455.1 | Ube2e1        | Mus musculus ubiquitin-conjugating enzyme E2E 1, UBC4/5 homolog ( |
| Down at 24 hrs | A_65_P13642 | 0.46 | 0.039             |               | Intronic in U033898                                               |
| Down at 24 hrs | A_65_P18201 | 0.46 | 0.027             |               | UNKNOWN                                                           |
| Down at 24 hrs | A_65_P12487 | 0.46 | 0.048 NM_025997.1 | 2610204K14Rik | Mus musculus RIKEN cDNA 2610204K14 gene (2610204K14Rik), mRNA     |
| Down at 24 hrs | A_65_P14395 | 0.46 | 0.027 BC031743.1  |               | RSEC6 PROTEIN (FRAGMENT) homolog [Rattus norvegicus]              |
| Down at 24 hrs | A_65_P16130 | 0.46 | 0.021 NM_008434.1 | Kcnq1         | UNKNOWN                                                           |
| Down at 24 hrs | A_65_P16278 | 0.46 | 0.050 NM_170756.1 | BC034597      | SPERMATOGENESIS ASSOCIATED PROTEIN 2 SPERMATOGENESIS ASSOCIATED P |
| Down at 24 hrs | A_65_P14782 | 0.46 | 0.033 NM_080469.1 | Prnpip1       | Mus musculus prion protein interacting protein 1 (Prnpip1), mRNA  |
| Down at 24 hrs | A_65_P17654 | 0.46 | 0.028             | AA407111      | Intronic in U004559                                               |
| Down at 24 hrs | A_65_P16043 | 0.46 | 0.046 NM_019936.1 | Cript-pending | Mus musculus postsynaptic protein Cript (Cript-pending), mRNA     |
| Down at 24 hrs | A_65_P18890 | 0.46 | 0.029 NM_008275.1 | Hoxd13        | Mus musculus homeo box D13 (Hoxd13), mRNA                         |
| Down at 24 hrs | A_65_P15197 | 0.45 | 0.018             |               | Intronic in U039121                                               |
| Down at 24 hrs | A_65_P18574 | 0.45 | 0.045 BC016000.1  |               | SIMILAR TO ZINC FINGER PROTEIN 281. [Source:SPTREMBL;Acc:Q99L15]  |
| Down at 24 hrs | A_65_P13953 | 0.45 | 0.009 NM_031201.1 | Tstap35b      | Mus musculus tissue specific transplantation antigen P35B (Tstap3 |
| Down at 24 hrs | A_65_P14690 | 0.45 | 0.018 NM_010926.1 | Noc4          | Mus musculus neighbor of Cox4 (Noc4), mRNA                        |
| Down at 24 hrs | A_65_P18260 | 0.45 | 0.013             |               | REPEAT-SEQUENCE                                                   |
| Down at 24 hrs | A_65_P18702 | 0.45 | 0.017             |               | UNKNOWN                                                           |
| Down at 24 hrs | A_65_P15352 | 0.45 | 0.004             | Casp3         | Mus musculus caspase 3, apoptosis related cysteine protease (Casp |
| Down at 24 hrs | A_65_P16396 | 0.45 | 0.003             |               | Intronic in U034891                                               |
| Down at 24 hrs | A_65_P16422 | 0.45 | 0.025 NM_009584.1 | Zrf2          | zuotin related factor 2                                           |
| Down at 24 hrs | A_65_P17006 | 0.45 | 0.030             |               | UNKNOWN                                                           |
| Down at 24 hrs | A_65_P13772 | 0.45 | 0.008 XM_156103.1 | LOC207255     | Intronic in U040808                                               |
| Down at 24 hrs | A_65_P15270 | 0.45 | 0.004 AJ404329.1  | 4933439F18Rik | Mus musculus RIKEN cDNA 4933439F18 gene (4933439F18Rik), mRNA     |
| Down at 24 hrs | A_65_P15278 | 0.45 | 0.041 NM_008378.1 | Impact        | Mus musculus imprinted and ancient (Impact), mRNA                 |
| Down at 24 hrs | A_65_P16005 | 0.45 | 0.016 NM_008972.1 | Ptma          | Mus musculus prothymosin alpha (Ptma), mRNA                       |
| Down at 24 hrs | A_65_P17951 | 0.45 | 0.047 NM_145445.1 | LOC217715     | UNKNOWN                                                           |
| Down at 24 hrs | A_65_P19563 | 0.45 | 0.014 BC020178.1  | Srpk2         | Mus musculus serine/arginine-rich protein specific kinase 2 (Srpk |
| Down at 24 hrs | A_65_P16479 | 0.45 | 0.018 XM_178483.1 | Gti6          | CBP37 (FRAGMENT). [Source:SPTREMBL;Acc:O88380]                    |
| Down at 24 hrs | A_65_P17719 | 0.45 | 0.012             |               | weakly similar to KIAA0977 PROTEIN [Homo sapiens]                 |
| Down at 24 hrs | A_65_P20660 | 0.45 | 0.029             | LOC231801     | SIMILAR TO REV/REX ACTIVATION DOMAIN BINDING PROTEIN              |
| Down at 24 hrs | A_65_P12407 | 0.45 | 0.037             | BC003322      | UNKNOWN                                                           |
| Down at 24 hrs | A_65_P16121 | 0.45 | 0.025             | D5Ert40e      | hypothetical TPR repeat containing protein                        |
| Down at 24 hrs | A_65_P11409 | 0.45 | 0.042 XM_142236.2 |               | UBIQUITIN CARBOXYL TERMINAL HYDROLASE 22 EC 3.1.2.15 UBIQUITIN TH |
| Down at 24 hrs | A_65_P14771 | 0.45 | 0.020             | D4Ert510e     | UNKNOWN                                                           |

|                |             |      |                   |               |                                                                    |
|----------------|-------------|------|-------------------|---------------|--------------------------------------------------------------------|
| Down at 24 hrs | A_65_P16765 | 0.45 | 0.015 NM_010508.1 | lfnar1        | Mus musculus interferon (alpha and beta) receptor 1 (lfnar1), mRNA |
| Down at 24 hrs | A_65_P11479 | 0.45 | 0.018 NM_016806.1 | Hnrpa2b1      | Mus musculus heterogeneous nuclear ribonucleoprotein A2/B1 (Hnrpa  |
| Down at 24 hrs | A_65_P13371 | 0.45 | 0.016 NM_134048.1 | Al467391      | Mus musculus expressed sequence Al467391 (Al467391), mRNA          |
| Down at 24 hrs | A_65_P15104 | 0.45 | 0.008 NM_005502.2 | Abca1         | UNKNOWN                                                            |
| Down at 24 hrs | A_65_P15737 | 0.45 | 0.014 NM_146193.1 | Btbd1         | BTB/POZ DOMAIN CONTAINING PROTEIN 1 (GLUCOSE SIGNAL REPRESSING PR  |
| Down at 24 hrs | A_65_P15283 | 0.44 | 0.015 XM_124530.1 |               | UNKNOWN                                                            |
| Down at 24 hrs | A_65_P17188 | 0.44 | 0.047             |               | UNKNOWN                                                            |
| Down at 24 hrs | A_65_P17573 | 0.44 | 0.019             |               | REPEAT-SEQUENCE                                                    |
| Down at 24 hrs | A_65_P14435 | 0.44 | 0.019             |               | UNKNOWN                                                            |
| Down at 24 hrs | A_65_P13012 | 0.44 | 0.030 XM_130353.1 |               | 4.83342E+30 DELTA FATTY                                            |
| Down at 24 hrs | A_65_P13958 | 0.44 | 0.007             | AA545190      | UNKNOWN                                                            |
| Down at 24 hrs | A_65_P19425 | 0.44 | 0.038             |               | Intronic in U042294                                                |
| Down at 24 hrs | A_65_P15919 | 0.44 | 0.004 NM_025859.1 | 2310008D22Rik | Mus musculus RIKEN cDNA 2310008D22 gene (2310008D22Rik), mRNA      |
| Down at 24 hrs | A_65_P16706 | 0.44 | 0.018             |               | Intronic in U038567                                                |
| Down at 24 hrs | A_65_P17504 | 0.44 | 0.009             |               | Intronic in U022324                                                |
| Down at 24 hrs | A_65_P13467 | 0.44 | 0.001 XM_047325.5 | Sqle          | NOVEL PROTEIN SIMILAR TO AND                                       |
| Down at 24 hrs | A_65_P15838 | 0.44 | 0.045             |               | Intronic in U000232                                                |
| Down at 24 hrs | A_65_P16605 | 0.44 | 0.025             | Slc38a4       | Mus musculus solute carrier family 38, member 4 (Slc38a4), mRNA    |
| Down at 24 hrs | A_65_P12510 | 0.44 | 0.008 XM_129744.1 | Stat1         | Mus musculus signal transducer and activator of transcription 1 (  |
| Down at 24 hrs | A_65_P17640 | 0.44 | 0.045             | Timp4         | UNKNOWN                                                            |
| Down at 24 hrs | A_65_P14675 | 0.44 | 0.018 NM_172638.1 | 3632432H19    | BA108L7.8 (NOVEL PROTEIN (TRANSLATION OF CDNA FLJ10512 (EM:AK0013  |
| Down at 24 hrs | A_65_P17271 | 0.44 | 0.018             |               | Intronic in U016775                                                |
| Down at 24 hrs | A_65_P19379 | 0.44 | 0.028             |               | hypothetical Diisopropylfluorophosphatase (phosphotriesterase, DF  |
| Down at 24 hrs | A_65_P13840 | 0.44 | 0.020 NM_026365.1 | 5830427H10Rik | Mus musculus RIKEN cDNA 5830427H10 gene (5830427H10Rik), mRNA      |
| Down at 24 hrs | A_65_P14029 | 0.44 | 0.003 NM_145939.1 | MGC36684      | Mus musculus hypothetical protein MGC36684 (MGC36684), mRNA        |
| Down at 24 hrs | A_65_P16008 | 0.44 | 0.050 NM_133929.1 | Al841796      | Mus musculus expressed sequence Al841796 (Al841796), mRNA          |
| Down at 24 hrs | A_65_P19259 | 0.44 | 0.003             |               | UNKNOWN                                                            |
| Down at 24 hrs | A_65_P11374 | 0.44 | 0.044 XM_179215.1 | LOC265243     | Mus musculus solute carrier family 38, member 1 (Slc38a1), mRNA    |
| Down at 24 hrs | A_65_P16893 | 0.44 | 0.010             |               | UNKNOWN                                                            |
| Down at 24 hrs | A_65_P13744 | 0.43 | 0.004 XM_132318.2 | 9030618F05Rik | Mus musculus RIKEN cDNA 9030618F05 gene (9030618F05Rik), mRNA      |
| Down at 24 hrs | A_65_P14136 | 0.43 | 0.034             |               | UNKNOWN                                                            |
| Down at 24 hrs | A_65_P16600 | 0.43 | 0.038             | 4930451A13Rik | Intronic in U037125                                                |
| Down at 24 hrs | A_65_P17360 | 0.43 | 0.024             | 5730454B08Rik | Mus musculus RIKEN cDNA 5730454B08 gene (5730454B08Rik), mRNA      |
| Down at 24 hrs | A_65_P18173 | 0.43 | 0.001 BC024433.1  | Al463430      | BREFELDIN A INHIBITED GUANINE NUCLEOTIDE EXCHANGE PROTEIN 1 BREFE  |
| Down at 24 hrs | A_65_P14938 | 0.43 | 0.016 XM_133772.1 | Al427129      | Mus musculus expressed sequence AW557948 (AW557948), mRNA          |
| Down at 24 hrs | A_65_P14211 | 0.43 | 0.015 BC030454.1  | AW060987      | ACTIN-BINDING DOUBLE ZINC FINGER PROTEIN (FRAGMENT). [Source:SPTR  |
| Down at 24 hrs | A_65_P17251 | 0.43 | 0.041 NM_009459.1 | Ube2h         | Mus musculus ubiquitin-conjugating enzyme E2H (Ube2h), mRNA        |
| Down at 24 hrs | A_65_P13489 | 0.43 | 0.000             |               | UNKNOWN                                                            |
| Down at 24 hrs | A_65_P19730 | 0.43 | 0.030             |               | UNKNOWN                                                            |
| Down at 24 hrs | A_65_P09012 | 0.43 | 0.032 NM_025565.1 | 2600017H08Rik | Mus musculus RIKEN cDNA 2600017H08 gene (2600017H08Rik), mRNA      |
| Down at 24 hrs | A_65_P12503 | 0.43 | 0.033             | Fanca         | Mus musculus Fanconi anemia, complementation group A (Fanca), mRNA |
| Down at 24 hrs | A_65_P17651 | 0.43 | 0.030 XM_126978.2 | Zap3-pending  | NUCLEAR PROTEIN ZAP3. [Source:SWISSPROT;Acc:Q9R0I7]                |
| Down at 24 hrs | A_65_P18025 | 0.43 | 0.043             | 2310014B11Rik | UNKNOWN                                                            |
| Down at 24 hrs | A_65_P18273 | 0.43 | 0.028 NM_172875.1 | B930082O19    | ORNITHINE DECARBOXYLASE EC 4.1.1.17                                |
| Down at 24 hrs | A_65_P13541 | 0.43 | 0.034             |               | Intronic in U009836                                                |
| Down at 24 hrs | A_65_P19074 | 0.43 | 0.045 NM_008033.1 | Fnta          | UNKNOWN                                                            |
| Down at 24 hrs | A_65_P13832 | 0.43 | 0.023 NM_145554.1 | AA691260      | Mus musculus expressed sequence AA691260 (AA691260), mRNA          |
| Down at 24 hrs | A_65_P14815 | 0.43 | 0.010 NM_007566.1 | Birc6         | REPEAT-SEQUENCE                                                    |
| Down at 24 hrs | A_65_P14884 | 0.43 | 0.008             |               | UNKNOWN                                                            |
| Down at 24 hrs | A_65_P17270 | 0.43 | 0.004 AK005238.1  | 1500012M23Rik | Intronic in U038653                                                |
| Down at 24 hrs | A_65_P09566 | 0.42 | 0.011             | AW990744      | weakly similar to KIAA1789 PROTEIN (FRAGMENT) [Homo sapiens]       |
| Down at 24 hrs | A_65_P18586 | 0.42 | 0.013             | D12Ert216e    | UNKNOWN                                                            |
| Down at 24 hrs | A_65_P19911 | 0.42 | 0.041 XM_130944.2 | C79747        | CHROMOSOME ASSEMBLY PROTEIN XCAP                                   |
| Down at 24 hrs | A_65_P12608 | 0.42 | 0.003             |               | Intronic in U001805                                                |
| Down at 24 hrs | A_65_P19812 | 0.42 | 0.032 BC013785.1  | Psmb8         | Mus musculus proteasome (prosome, macropain) subunit, beta type 8  |
| Down at 24 hrs | A_65_P14350 | 0.42 | 0.012             |               | Similar to: Mus musculus 16 days neonate thymus cDNA, RIKEN full-  |
| Down at 24 hrs | A_65_P14811 | 0.42 | 0.042 BC036165.1  |               | Mus musculus similar to Y9C12A.1.p [Caenorhabditis elegans] (LOC2  |
| Down at 24 hrs | A_65_P16508 | 0.42 | 0.046 NM_025298.1 | Sin           | Mus musculus sex-lethal interactor homolog (Drosophila) (Sin), mR  |

|                |             |      |                   |               |                                                                    |
|----------------|-------------|------|-------------------|---------------|--------------------------------------------------------------------|
| Down at 24 hrs | A_65_P16991 | 0.42 | 0.027 NM_010589.1 | Jak3          | Mus musculus insulin-like 3 (InsI3), mRNA                          |
| Down at 24 hrs | A_65_P17543 | 0.42 | 0.019 NM_133747.1 | 2810405J04Rik | Mus musculus RIKEN cDNA 2810405J04 gene (2810405J04Rik), mRNA      |
| Down at 24 hrs | A_65_P18743 | 0.42 | 0.027 XM_132102.1 | AI853319      | ANTIGEN CONTAINING EPITOPE TO MONOCLONAL ANTIBODY MMS-85/12 (FRAG  |
| Down at 24 hrs | A_65_P19276 | 0.42 | 0.010 XM_132099.2 | LOC212285     | hypothetical SAM domain (Sterile alpha motif) containing protein   |
| Down at 24 hrs | A_65_P13626 | 0.42 | 0.002 XM_129744.1 | Stat1         | UNKNOWN                                                            |
| Down at 24 hrs | A_65_P19063 | 0.42 | 0.048             |               | Intronic in U018475                                                |
| Down at 24 hrs | A_65_P12171 | 0.42 | 0.020             |               | REPEAT-SEQUENCE                                                    |
| Down at 24 hrs | A_65_P17461 | 0.42 | 0.043             |               | UNKNOWN                                                            |
| Down at 24 hrs | A_65_P11892 | 0.42 | 0.045 NM_172815.1 | D430027K22    | weakly similar to THROMBOSPONDIN [Homo sapiens]                    |
| Down at 24 hrs | A_65_P08892 | 0.42 | 0.029 NM_025959.1 | 2300001E01Rik | Mus musculus RIKEN cDNA 2300001E01 gene (2300001E01Rik), mRNA      |
| Down at 24 hrs | A_65_P16268 | 0.42 | 0.042 NM_027915.1 | Ap2b1         | Mus musculus adaptor-related protein complex 2, beta 1 subunit (A  |
| Down at 24 hrs | A_65_P13020 | 0.41 | 0.040             | 2610020G18Rik | Mus musculus RIKEN cDNA 2610020G18 gene (2610020G18Rik), mRNA      |
| Down at 24 hrs | A_65_P14146 | 0.41 | 0.015             |               | UNKNOWN                                                            |
| Down at 24 hrs | A_65_P15239 | 0.41 | 0.041 NM_011691.1 | Vav           | Mus musculus vav oncogene (Vav), mRNA                              |
| Down at 24 hrs | A_65_P16573 | 0.41 | 0.033             |               | UNKNOWN                                                            |
| Down at 24 hrs | A_65_P18601 | 0.41 | 0.014             |               | Similar to: Mus musculus adult male urinary bladder cDNA, RIKEN f  |
| Down at 24 hrs | A_65_P12498 | 0.41 | 0.029 NM_008662.1 | Myo6          | Mus musculus myosin VI (Myo6), mRNA                                |
| Down at 24 hrs | A_65_P16602 | 0.41 | 0.002 XM_129279.1 | Nolc1         | Mus musculus nucleolar and coiled-body phosphoprotein 1 (Nolc1),   |
| Down at 24 hrs | A_65_P12427 | 0.41 | 0.018             |               | Intronic in U039189                                                |
| Down at 24 hrs | A_65_P14750 | 0.41 | 0.006             |               | UNKNOWN                                                            |
| Down at 24 hrs | A_65_P16326 | 0.41 | 0.004 XM_127302.1 | 5730412B09Rik | BA62C3                                                             |
| Down at 24 hrs | A_65_P18780 | 0.41 | 0.021             |               | Intronic in U006558                                                |
| Down at 24 hrs | A_65_P13007 | 0.41 | 0.003             |               | UNKNOWN                                                            |
| Down at 24 hrs | A_65_P18412 | 0.41 | 0.015 NM_031026.1 | AA409702      | DYNEIN LIGHT INTERMEDIATE CHAIN 2, CYTOSOLIC LIC53/55 LIC          |
| Down at 24 hrs | A_65_P15337 | 0.41 | 0.016             |               | Intronic in U016208                                                |
| Down at 24 hrs | A_65_P12790 | 0.41 | 0.036             |               | UNKNOWN                                                            |
| Down at 24 hrs | A_65_P15847 | 0.41 | 0.045 NM_016688.1 | Pdcd7         | Mus musculus programmed cell death protein 7 (Pdcd7), mRNA         |
| Down at 24 hrs | A_65_P18004 | 0.41 | 0.038 BC013628.1  | Cpsf2         | UNKNOWN                                                            |
| Down at 24 hrs | A_65_P18421 | 0.41 | 0.019             |               | UNKNOWN                                                            |
| Down at 24 hrs | A_65_P16031 | 0.40 | 0.002             | Tia1          | Mus musculus cytotoxic granule-associated RNA binding protein 1 (  |
| Down at 24 hrs | A_65_P12344 | 0.40 | 0.017 NM_018782.1 | Calcr1        | Mus musculus calcitonin receptor-like (Calcr1), mRNA               |
| Down at 24 hrs | A_65_P12325 | 0.40 | 0.031             | D5Ertd77e     | Intronic in U026257                                                |
| Down at 24 hrs | A_65_P16204 | 0.40 | 0.003 NM_018785.1 | Fnbp3         | Mus musculus formin binding protein 3 (Fnbp3), mRNA                |
| Down at 24 hrs | A_65_P16497 | 0.40 | 0.048 NM_025613.1 | Cri1          | Mus musculus CREBBP/EP300 inhibitory protein 1 (Cri1), mRNA        |
| Down at 24 hrs | A_65_P13184 | 0.40 | 0.016 XM_139588.1 |               | similar to HYPOTHETICAL PROTEIN KIAA0934 (FRAGMENT) [Homo sapiens] |
| Down at 24 hrs | A_65_P13392 | 0.40 | 0.011 XM_138798.1 |               | UNKNOWN                                                            |
| Down at 24 hrs | A_65_P15848 | 0.40 | 0.035 NM_011692.1 | Vbp1          | Mus musculus von Hippel-Lindau binding protein 1 (Vbp1), mRNA      |
| Down at 24 hrs | A_65_P18189 | 0.40 | 0.019 XM_133480.2 | AI646796      | Mus musculus similar to Hypothetical protein KIAA1017 (LOC233216)  |
| Down at 24 hrs | A_65_P18980 | 0.40 | 0.033             |               | UNKNOWN                                                            |
| Down at 24 hrs | A_65_P12591 | 0.40 | 0.043 NM_011487.1 | Stat4         | Mus musculus signal transducer and activator of transcription 4 (  |
| Down at 24 hrs | A_65_P18991 | 0.40 | 0.049 XM_130038.1 | Cubn          | INTRINSIC FACTOR B12 RECEPTOR                                      |
| Down at 24 hrs | A_65_P17794 | 0.40 | 0.036 BC003756.1  | Kcnj8         | Mus musculus potassium inwardly-rectifying channel, subfamily J,   |
| Down at 24 hrs | A_65_P13736 | 0.40 | 0.040             |               | Intronic in U023417                                                |
| Down at 24 hrs | A_65_P14904 | 0.40 | 0.008             |               | UNKNOWN                                                            |
| Down at 24 hrs | A_65_P17337 | 0.40 | 0.049             | D10Ert638e    | UNKNOWN                                                            |
| Down at 24 hrs | A_65_P13538 | 0.39 | 0.048 XM_129773.2 |               | UNKNOWN                                                            |
| Down at 24 hrs | A_65_P14532 | 0.39 | 0.030             |               | UNKNOWN                                                            |
| Down at 24 hrs | A_65_P14845 | 0.39 | 0.011 XM_140371.1 | Adamts19      | Similar to: Mus musculus a disintegrin-like and metalloprotease (  |
| Down at 24 hrs | A_65_P16122 | 0.39 | 0.038 NM_153561.1 | MGC27904      | Mus musculus hypothetical protein MGC27904 (MGC27904), mRNA        |
| Down at 24 hrs | A_65_P16151 | 0.39 | 0.042             | Gna13         | Mus musculus guanine nucleotide binding protein, alpha 13 (Gna13)  |
| Down at 24 hrs | A_65_P13726 | 0.39 | 0.013             |               | UNKNOWN                                                            |
| Down at 24 hrs | A_65_P16432 | 0.39 | 0.027 XM_110161.1 | Ranbp1        | Mus musculus RAN binding protein 1 (Ranbp1), mRNA                  |
| Down at 24 hrs | A_65_P12351 | 0.39 | 0.036             |               | UNKNOWN                                                            |
| Down at 24 hrs | A_65_P15563 | 0.39 | 0.046 XM_128334.1 | 1110051N18Rik | Similar to: Homo sapiens nuclear matrix protein NXP-2 (NXP-2), mR  |
| Down at 24 hrs | A_65_P15216 | 0.39 | 0.049             |               | UNKNOWN                                                            |
| Down at 24 hrs | A_65_P18195 | 0.39 | 0.040 AP001295.1  | Kcnq1         | Mus musculus genomic DNA, chromosome 7, clone:B96, complete seque  |
| Down at 24 hrs | A_65_P19738 | 0.39 | 0.045 NM_008619.1 | Mov10         | Mus musculus Moloney leukemia virus 10 (Mov10), mRNA               |
| Down at 24 hrs | A_65_P15628 | 0.39 | 0.047             | LOC217026     | Mus musculus similar to hypothetical protein FLJ22087 (LOC217026)  |

|                |             |      |                   |               |                                                                   |
|----------------|-------------|------|-------------------|---------------|-------------------------------------------------------------------|
| Down at 24 hrs | A_65_P15732 | 0.39 | 0.010 XM_132974.1 | Om1-pending   | ATP-binding cassette, sub-family C (CFTR/MRP), member 10          |
| Down at 24 hrs | A_65_P16039 | 0.39 | 0.005             | 1700010P07Rik | Mus musculus RIKEN cDNA 1700010P07 gene (1700010P07Rik), mRNA     |
| Down at 24 hrs | A_65_P16047 | 0.39 | 0.038             | Kif2          | Mus musculus kinesin heavy chain member 2 (Kif2), mRNA            |
| Down at 24 hrs | A_65_P14798 | 0.39 | 0.030             |               | Intronic in U005154                                               |
| Down at 24 hrs | A_65_P18681 | 0.39 | 0.036 XM_177471.1 | Zfp192        | SCAN-KRAB-ZINC FINGER GENE 1; GENE. [Source:RefSeq;Acc:NM_023685] |
| Down at 24 hrs | A_65_P17571 | 0.38 | 0.044 NM_016792.1 | Txnl          | Mus musculus thioredoxin-like (32kD) (Txnl), mRNA                 |
| Down at 24 hrs | A_65_P11586 | 0.38 | 0.041 NM_009807.1 | Casp1         | Mus musculus caspase 1 (Casp1), mRNA                              |
| Down at 24 hrs | A_65_P16986 | 0.38 | 0.039 BC026478.1  |               | Intronic in U025435                                               |
| Down at 24 hrs | A_65_P15451 | 0.38 | 0.004 BC025434.1  |               | weakly similar to BAW [Fugu rubripes]                             |
| Down at 24 hrs | A_65_P15911 | 0.38 | 0.019 NM_008929.1 | Dnajc3        | Mus musculus DnaJ (Hsp40) homolog, subfamily C, member 3 (Dnajc3) |
| Down at 24 hrs | A_65_P13310 | 0.38 | 0.034 NM_173181.1 | 3110050N22Rik | Similar to CGI-62 protein (Homo sapiens)                          |
| Down at 24 hrs | A_65_P14361 | 0.38 | 0.033             | D5Erd605e     | UNKNOWN                                                           |
| Down at 24 hrs | A_65_P15193 | 0.38 | 0.009             | Decr2         | Intronic in U040829                                               |
| Down at 24 hrs | A_65_P15659 | 0.38 | 0.019 NM_013821.1 | Hsd3b6        | Mus musculus hydroxysteroid dehydrogenase-1, delta<5>-3-beta (Hsd |
| Down at 24 hrs | A_65_P16890 | 0.38 | 0.007 XM_133737.1 | LOC207352     | PHOSPHOLIPASE homolog [Homo sapiens]                              |
| Down at 24 hrs | A_65_P18604 | 0.38 | 0.022             |               | UNKNOWN                                                           |
| Down at 24 hrs | A_65_P18863 | 0.38 | 0.040 XM_129338.1 |               | CYTOCHROME P450 EC 1.14.14.1                                      |
| Down at 24 hrs | A_65_P13659 | 0.38 | 0.015 NM_019662.1 | Rrad          | Mus musculus Ras-related associated with diabetes (Rrad), mRNA    |
| Down at 24 hrs | A_65_P14626 | 0.38 | 0.027             |               | UNKNOWN                                                           |
| Down at 24 hrs | A_65_P15953 | 0.38 | 0.033 NM_023878.1 | Cldn10        | UNKNOWN                                                           |
| Down at 24 hrs | A_65_P17755 | 0.38 | 0.027 NM_026013.1 | 2610318G18Rik | Mus musculus RIKEN cDNA 2610318G18 gene (2610318G18Rik), mRNA     |
| Down at 24 hrs | A_65_P18812 | 0.38 | 0.007             | Gcnt2         | Mus musculus RIKEN cDNA 5330430K10 gene (5330430K10Rik), mRNA     |
| Down at 24 hrs | A_65_P15043 | 0.38 | 0.029 AF002823.1  | Bub1          | UNKNOWN                                                           |
| Down at 24 hrs | A_65_P18905 | 0.38 | 0.050             | C77973        | UNKNOWN                                                           |
| Down at 24 hrs | A_65_P14112 | 0.38 | 0.044             | Plaa          | UNKNOWN                                                           |
| Down at 24 hrs | A_65_P16291 | 0.38 | 0.034 NM_025315.1 | Surb7         | Mus musculus SRB7 (supressor of RNA polymerase B) homolog (S. cer |
| Down at 24 hrs | A_65_P14128 | 0.38 | 0.048 XM_130372.1 |               | Intronic in U022723                                               |
| Down at 24 hrs | A_65_P17675 | 0.38 | 0.041 XM_131324.1 | Orc3l         | Mus musculus RIKEN cDNA 2700059D21 gene (2700059D21Rik), mRNA     |
| Down at 24 hrs | A_65_P18087 | 0.37 | 0.006 NM_013771.1 | Yme11l        | Mus musculus YME1-like 1 (S. cerevisiae) (Yme11), mRNA            |
| Down at 24 hrs | A_65_P16686 | 0.37 | 0.030             |               | Intronic in U036850                                               |
| Down at 24 hrs | A_65_P16901 | 0.37 | 0.025             | Tm6sf1        | Mus musculus transmembrane 6 superfamily member 1 (Tm6sf1), mRNA  |
| Down at 24 hrs | A_65_P15640 | 0.37 | 0.028 X53176.1    | Itga4         | Mus musculus integrin alpha 4 (Itga4), mRNA                       |
| Down at 24 hrs | A_65_P16764 | 0.37 | 0.026 BC029317.1  |               | CENTAURIN BETA2 homolog [Homo sapiens]                            |
| Down at 24 hrs | A_65_P17920 | 0.37 | 0.013             |               | UNKNOWN                                                           |
| Down at 24 hrs | A_65_P13575 | 0.37 | 0.036 XM_125380.1 | Cask          | Mus musculus calcium/calmodulin-dependent serine protein kinase ( |
| Down at 24 hrs | A_65_P13675 | 0.37 | 0.041             |               | Intronic in U003173                                               |
| Down at 24 hrs | A_65_P16102 | 0.37 | 0.028             |               | UNKNOWN                                                           |
| Down at 24 hrs | A_65_P14995 | 0.36 | 0.031 NM_009298.1 | Surf6         | Mus musculus surfeit gene 6 (Surf6), mRNA                         |
| Down at 24 hrs | A_65_P16338 | 0.36 | 0.048             |               | UNKNOWN                                                           |
| Down at 24 hrs | A_65_P16676 | 0.36 | 0.026 NM_026640.1 | AW413625      | Mus musculus RIKEN cDNA 4632417K18 gene (4632417K18Rik), mRNA     |
| Down at 24 hrs | A_65_P19138 | 0.36 | 0.028 BC003404.1  | Axot          | Mus musculus axotrophin (Axot), mRNA                              |
| Down at 24 hrs | A_65_P10841 | 0.36 | 0.041             |               | UNKNOWN                                                           |
| Down at 24 hrs | A_65_P17968 | 0.36 | 0.040             |               | UNKNOWN                                                           |
| Down at 24 hrs | A_65_P16037 | 0.36 | 0.024 BC022247.1  | AU019184      | HYPOTHETICAL 46.6 KDA PROTEIN (FRAGMENT). [Source:SPTREMBL;Acc:Q9 |
| Down at 24 hrs | A_65_P18573 | 0.36 | 0.009 NM_024254.1 | 2410042D21Rik | UNKNOWN                                                           |
| Down at 24 hrs | A_65_P15059 | 0.36 | 0.008             | AV006182      | MICROSOMAL STRESS 70 PROTEIN ATPASE CORE homolog [Rattus norvegic |
| Down at 24 hrs | A_65_P18694 | 0.36 | 0.005 XM_157736.1 |               | UNKNOWN                                                           |
| Down at 24 hrs | A_65_P13749 | 0.36 | 0.035 XM_127539.1 | Cdk7          | CELL DIVISION PROTEIN KINASE 7 (EC 2.7.1.-) (CDK-ACTIVATING KINAS |
| Down at 24 hrs | A_65_P15576 | 0.36 | 0.025 NM_007790.1 | Cspg6         | Mus musculus chondroitin sulfate proteoglycan 6 (Cspg6), mRNA     |
| Down at 24 hrs | A_65_P15625 | 0.36 | 0.045 NM_009029.1 | Rb1           | Mus musculus retinoblastoma 1 (Rb1), mRNA                         |
| Down at 24 hrs | A_65_P13175 | 0.36 | 0.005 BC028830.1  | 1110037F02Rik | KAI1A871 PROTEIN homolog [Homo sapiens]                           |
| Down at 24 hrs | A_65_P13752 | 0.36 | 0.033             |               | UNKNOWN                                                           |
| Down at 24 hrs | A_65_P14816 | 0.36 | 0.013             |               | Intronic in U013701                                               |
| Down at 24 hrs | A_65_P15269 | 0.36 | 0.002 XM_047325.5 | Sqle          | NOVEL PROTEIN SIMILAR TO AND                                      |
| Down at 24 hrs | A_65_P15824 | 0.36 | 0.029             |               | ZINC FINGER PROTEIN                                               |
| Down at 24 hrs | A_65_P17550 | 0.36 | 0.030 BC034079.1  | 2810404F18Rik | NON KINASE CDC42 EFFECTOR PROTEIN                                 |
| Down at 24 hrs | A_65_P17507 | 0.36 | 0.003 XM_130605.2 | 2610304G08Rik | weakly similar to CYCLIN-DEPENDENT KINASE INHIBITOR-RELATED PROTE |
| Down at 24 hrs | A_65_P19234 | 0.36 | 0.022             |               | Intronic in U009526                                               |

|                |             |      |                   |                             |                                                                   |
|----------------|-------------|------|-------------------|-----------------------------|-------------------------------------------------------------------|
| Down at 24 hrs | A_65_P14660 | 0.35 | 0.022             | Stx7                        | Mus musculus syntaxin 7 (Stx7), mRNA                              |
| Down at 24 hrs | A_65_P17071 | 0.35 | 0.030             |                             | UNKNOWN                                                           |
| Down at 24 hrs | A_65_P17643 | 0.35 | 0.045             | AA409749                    | Intronic in U032260                                               |
| Down at 24 hrs | A_65_P14197 | 0.35 | 0.030             |                             | similar to CDNA FLJ10680 FIS, CLONE NT2RP2006573, WEAKLY SIMILAR  |
| Down at 24 hrs | A_65_P17778 | 0.35 | 0.038 NM_010748.1 | Lyst                        | Mus musculus lysosomal trafficking regulator (Lyst), mRNA         |
| Down at 24 hrs | A_65_P18237 | 0.35 | 0.039 NM_013505.1 | Dsc2                        | DESMOCOLLIN 2A/2B PRECURSOR (EPITHELIAL TYPE 2 DESMOCOLLIN). [Sou |
| Down at 24 hrs | A_65_P17499 | 0.35 | 0.019 BC024825.1  | AW545847                    | A KINASE ANCHOR PROTEIN 9 PROTEIN KINASE A ANCHORING PROTEIN 9 PR |
| Down at 24 hrs | A_65_P18988 | 0.35 | 0.001 XM_178329.1 | 2310036D04Rik               | PYRIDOXINE KINASE EC 2.7.1.35 PYRIDOXAL                           |
| Down at 24 hrs | A_65_P19056 | 0.35 | 0.004             |                             | Intronic in U016279                                               |
| Down at 24 hrs | A_65_P12270 | 0.35 | 0.018 BC035275.1  | C130028L17                  | UNKNOWN                                                           |
| Down at 24 hrs | A_65_P16953 | 0.35 | 0.019             | A1551093                    | GERANYLGERANYL TRANSFERASE TYPE I BETA SUBUNIT EC 2.5.1.- TYPE I  |
| Down at 24 hrs | A_65_P14572 | 0.35 | 0.021 NM_026442.1 | 2010110K16Rik               | Mus musculus RIKEN cDNA 2010110K16 gene (2010110K16Rik), mRNA     |
| Down at 24 hrs | A_65_P16872 | 0.35 | 0.014             | Alcam                       | CD166 ANTIGEN PRECURSOR (ACTIVATED LEUKOCYTE-CELL ADHESION MOLECU |
| Down at 24 hrs | A_65_P18097 | 0.35 | 0.025 NM_027280.1 | Nkd1                        | Mus musculus naked cuticle 1 homolog (Drosophila) (Nkd1), mRNA    |
| Down at 24 hrs | A_65_P19551 | 0.35 | 0.004             |                             | UNKNOWN                                                           |
| Down at 24 hrs | A_65_P16502 | 0.34 | 0.001             | C85445                      | Intronic in U036273                                               |
| Down at 24 hrs | A_65_P18049 | 0.34 | 0.015             | D15Ert489e                  | UNKNOWN                                                           |
| Down at 24 hrs | A_65_P19365 | 0.34 | 0.048 NM_025832.1 | 1300019C06Rik               | Mus musculus RIKEN cDNA 1300019C06 gene (1300019C06Rik), mRNA     |
| Down at 24 hrs | A_65_P14470 | 0.34 | 0.013 XM_147642.1 |                             | hypothetical 53-Exonuclease N- and I-domains containing protein   |
| Down at 24 hrs | A_65_P16111 | 0.34 | 0.013 NM_133249.1 | LOC170826                   | Mus musculus PPAR gamma coactivator-1beta protein (LOC170826), mR |
| Down at 24 hrs | A_65_P13690 | 0.34 | 0.011             | Gpr73                       | UNKNOWN                                                           |
| Down at 24 hrs | A_65_P15459 | 0.34 | 0.046             |                             | Intronic in U025764                                               |
| Down at 24 hrs | A_65_P16117 | 0.34 | 0.034 BC023730.1  |                             | Mus musculus similar to Protein CDC27Hs (Cell division cycle prot |
| Down at 24 hrs | A_65_P18518 | 0.34 | 0.038             |                             | Intronic in U002580                                               |
| Down at 24 hrs | A_65_P20277 | 0.34 | 0.045             | A1839867                    | BINDING                                                           |
| Down at 24 hrs | A_65_P16067 | 0.34 | 0.011 NM_021528.1 | C4st2-pending               | Mus musculus chondroitin 4-sulfotransferase 2 (C4st2-pending), mR |
| Down at 24 hrs | A_65_P18294 | 0.34 | 0.024 XM_128756.2 | Ppm1b                       | PROTEIN PHOSPHATASE 2C BETA ISOFORM (EC 3.1.3.16) (PP2C-BETA) (IA |
| Down at 24 hrs | A_65_P18676 | 0.34 | 0.008             |                             | Intronic in U031895                                               |
| Down at 24 hrs | A_65_P19367 | 0.34 | 0.002 NM_016907.1 | Spint1                      | Mus musculus serine protease inhibitor, Kunitz type 1 (Spint1), m |
| Down at 24 hrs | A_65_P16865 | 0.34 | 0.006             | Rrm2b                       | UNKNOWN                                                           |
| Down at 24 hrs | A_65_P16899 | 0.34 | 0.037             |                             | UNKNOWN                                                           |
| Down at 24 hrs | A_65_P17653 | 0.34 | 0.040 BC018238.1  | Fgf13                       | Mus musculus fibroblast growth factor 13 (Fgf13), mRNA            |
| Down at 24 hrs | A_65_P18816 | 0.34 | 0.034 NM_153503.1 | 2810428C21Rik               | Mus musculus RIKEN cDNA 2810428C21 gene (2810428C21Rik), mRNA     |
| Down at 24 hrs | A_65_P11387 | 0.34 | 0.036             | A930026I22Rik               | UNKNOWN                                                           |
| Down at 24 hrs | A_65_P20519 | 0.34 | 0.010 NM_020560.1 | Mrps31                      | Mus musculus mitochondrial ribosomal protein S31 (Mrps31), mRNA   |
| Down at 24 hrs | A_65_P19828 | 0.33 | 0.036             | D14Ert16e                   | UNKNOWN                                                           |
| Down at 24 hrs | A_65_P18313 | 0.33 | 0.008 BC035197.1  | 4933405K07Rik;C630016O21Rik | MSZF6 (FRAGMENT). [Source:SPTREMBL;Acc:O88217]                    |
| Down at 24 hrs | A_65_P19937 | 0.33 | 0.043             |                             | UNKNOWN                                                           |
| Down at 24 hrs | A_65_P15565 | 0.33 | 0.004 XM_128800.2 | Map4k3                      | SIMILAR TO MITOGEN-ACTIVATED PROTEIN KINASE KINASE KINASE KINASE  |
| Down at 24 hrs | A_65_P16684 | 0.33 | 0.011             |                             | Intronic in U037462                                               |
| Down at 24 hrs | A_65_P17471 | 0.33 | 0.033 NM_144919.1 | MGC27683                    | Mus musculus hypothetical protein MGC27683 (MGC27683), mRNA       |
| Down at 24 hrs | A_65_P16088 | 0.33 | 0.025 AK018238.1  | Copg2as2                    | Mus musculus coatomer protein complex, subunit gamma 2, antisense |
| Down at 24 hrs | A_65_P17909 | 0.33 | 0.004 XM_135205.2 | AW545966                    | KELCH LIKE PROTEIN                                                |
| Down at 24 hrs | A_65_P16304 | 0.32 | 0.005 XM_136183.1 | D1Ert367e                   | UNKNOWN                                                           |
| Down at 24 hrs | A_65_P13851 | 0.32 | 0.021 BC025126.1  | Zdhc3                       | SIMILAR TO DHHC1 PROTEIN homolog [Homo sapiens]                   |
| Down at 24 hrs | A_65_P14347 | 0.32 | 0.030 AJ223076.1  | AU024550                    | Mus musculus leucine rich repeat (in FLII) interacting protein 1  |
| Down at 24 hrs | A_65_P14834 | 0.32 | 0.038             |                             | UNKNOWN                                                           |
| Down at 24 hrs | A_65_P16145 | 0.32 | 0.008             | Pml                         | Intronic in U030936                                               |
| Down at 24 hrs | A_65_P19595 | 0.32 | 0.047 NM_023118.1 | Dab2                        | Mus musculus disabled homolog 2 (Drosophila) (Dab2), mRNA         |
| Down at 24 hrs | A_65_P15509 | 0.32 | 0.041             |                             | UNKNOWN                                                           |
| Down at 24 hrs | A_65_P13739 | 0.32 | 0.007             |                             | Intronic in U040836                                               |
| Down at 24 hrs | A_65_P15472 | 0.32 | 0.042 NM_025898.1 | Napa                        | Mus musculus N-ethylmaleimide sensitive fusion protein attachment |
| Down at 24 hrs | A_65_P15759 | 0.32 | 0.008 NM_053123.1 | Smarca1                     | Mus musculus SWI/SNF related, matrix associated, actin dependent  |
| Down at 24 hrs | A_65_P16386 | 0.32 | 0.008 XM_177016.1 | 1110008B24Rik               | SIMILAR TO CGI 35                                                 |
| Down at 24 hrs | A_65_P14424 | 0.31 | 0.040             | C77448                      | Intronic in U040728                                               |
| Down at 24 hrs | A_65_P15268 | 0.31 | 0.018             | D8Ert158e                   | Intronic in U009800                                               |
| Down at 24 hrs | A_65_P15929 | 0.31 | 0.021 AJ271885.2  | Kcnq1                       | Similar to: Mus musculus partial Kcnq1 gene for potassium channel |
| Down at 24 hrs | A_65_P16973 | 0.31 | 0.034 NM_009692.1 | Apoa1                       | Mus musculus apolipoprotein A-I (Apoa1), mRNA                     |

|                |             |      |       |             |               |                                                                     |
|----------------|-------------|------|-------|-------------|---------------|---------------------------------------------------------------------|
| Down at 24 hrs | A_65_P17500 | 0.31 | 0.019 | BC019860.1  |               | UNKNOWN                                                             |
| Down at 24 hrs | A_65_P20581 | 0.31 | 0.039 |             |               | Intronic in U006608                                                 |
| Down at 24 hrs | A_65_P12215 | 0.31 | 0.009 |             |               | UNKNOWN                                                             |
| Down at 24 hrs | A_65_P17044 | 0.31 | 0.044 | NM_013556.1 | Hprt          | Mus musculus hypoxanthine guanine phosphoribosyl transferase (Hprt) |
| Down at 24 hrs | A_65_P16620 | 0.31 | 0.021 | BC023855.1  | D1Erd8e       | Mus musculus, clone IMAGE:5346771, mRNA                             |
| Down at 24 hrs | A_65_P18605 | 0.31 | 0.013 |             | AU042359      | BREAKPOINT CLUSTER REGION                                           |
| Down at 24 hrs | A_65_P17536 | 0.31 | 0.049 | NM_133687.1 | 4930415K17Rik | Mus musculus RIKEN cDNA 4930415K17 gene (4930415K17Rik), mRNA       |
| Down at 24 hrs | A_65_P13372 | 0.31 | 0.046 | XM_130887.1 | 2810407E23Rik | hypothetical DEAD/DEAH box helicase containing protein              |
| Down at 24 hrs | A_65_P16252 | 0.31 | 0.005 | XM_130306.2 | Sp3           | TRANSCRIPTION FACTOR SP3 (FRAGMENT). [Source:SPTREMBL;Acc:O70494]   |
| Down at 24 hrs | A_65_P15751 | 0.30 | 0.009 | XM_130519.2 | 2810002D13Rik | hypothetical Leucine-rich repeat, typical subtype containing prot   |
| Down at 24 hrs | A_65_P12349 | 0.30 | 0.049 | NM_025429.1 | Serpinb1a     | Mus musculus serine (or cysteine) proteinase inhibitor, clade B (   |
| Down at 24 hrs | A_65_P19426 | 0.30 | 0.031 | XM_141448.1 |               | GAG                                                                 |
| Down at 24 hrs | A_65_P16411 | 0.30 | 0.049 | NM_001148.2 | ANKYRIN 2     | ANKYRIN                                                             |
| Down at 24 hrs | A_65_P17236 | 0.30 | 0.024 |             |               | 60S RIBOSOMAL PROTEIN                                               |
| Down at 24 hrs | A_65_P18192 | 0.30 | 0.013 | NM_027206.1 | 1810019A08Rik | Mus musculus RIKEN cDNA 1810019A08 gene (1810019A08Rik), mRNA       |
| Down at 24 hrs | A_65_P18902 | 0.30 | 0.005 |             |               | Intronic in U038606                                                 |
| Down at 24 hrs | A_65_P16593 | 0.30 | 0.032 | XM_129730.1 | D1Wsu40e      | DNA SEGMENT, CHR 1, WAYNE STATE UNIVERSITY 40, EXPRESSED. [Source   |
| Down at 24 hrs | A_65_P16482 | 0.30 | 0.024 | NM_009281.2 | Zfp143        | Mus musculus zinc finger protein 143 (Zfp143), mRNA                 |
| Down at 24 hrs | A_65_P18801 | 0.29 | 0.019 |             |               | UNKNOWN                                                             |
| Down at 24 hrs | A_65_P15637 | 0.29 | 0.033 |             |               | Intronic in U022588                                                 |
| Down at 24 hrs | A_65_P16496 | 0.29 | 0.019 |             |               | UNKNOWN                                                             |
| Down at 24 hrs | A_65_P12596 | 0.29 | 0.037 | XM_177886.1 |               | weakly similar to DNA-BINDING PROTEIN (FRAGMENT) [Homo sapiens]     |
| Down at 24 hrs | A_65_P15334 | 0.29 | 0.026 | NM_008402.1 | Ilgav         | Mus musculus integrin alpha V (Ilgav), mRNA                         |
| Down at 24 hrs | A_65_P16705 | 0.29 | 0.046 | NM_025515.1 | 2310015N07Rik | Similar to: Mus musculus RIKEN cDNA 2310015N07 gene (2310015N07Ri   |
| Down at 24 hrs | A_65_P17252 | 0.29 | 0.018 | NM_023733.1 | Crot          | Mus musculus carnitine O-octanoyltransferase (Crot), mRNA           |
| Down at 24 hrs | A_65_P15735 | 0.29 | 0.021 | NM_007644.1 | Scarb2        | Similar to: Mus musculus 16 days embryo head cDNA, RIKEN full-len   |
| Down at 24 hrs | A_65_P19081 | 0.29 | 0.024 | XM_136041.2 | Al448196      | Mus musculus expressed sequence Al448196 (Al448196), mRNA           |
| Down at 24 hrs | A_65_P19360 | 0.29 | 0.011 |             |               | REPEAT-SEQUENCE                                                     |
| Down at 24 hrs | A_65_P18418 | 0.28 | 0.019 | XM_132843.2 | LOC212904     | Mus musculus similar to Hypothetical protein KIAA0779 (LOC212904)   |
| Down at 24 hrs | A_65_P19082 | 0.28 | 0.001 |             |               | Intronic in U031412                                                 |
| Down at 24 hrs | A_65_P19265 | 0.28 | 0.012 |             | D5Erd470e     | UNKNOWN                                                             |
| Down at 24 hrs | A_65_P16854 | 0.28 | 0.042 | XM_134868.1 | Anp32a        | ACIDIC NUCLEAR PHOSPHOPROTEIN 32. [Source:RefSeq;Acc:NM_009672]     |
| Down at 24 hrs | A_65_P18239 | 0.28 | 0.010 | AK019966.1  | 5730467H21Rik | Mus musculus 8 days embryo whole body cDNA, RIKEN full-length enr   |
| Down at 24 hrs | A_65_P16196 | 0.28 | 0.026 | NM_011112.1 | Papola        | Mus musculus poly (A) polymerase alpha (Papola), mRNA               |
| Down at 24 hrs | A_65_P16681 | 0.28 | 0.014 | AL831816.1  | LOC229096     | weakly similar to HIGH-GLUCOSE-REGULATED PROTEIN 8 [Homo sapiens]   |
| Down at 24 hrs | A_65_P13876 | 0.28 | 0.043 | XM_127961.2 | 9930116P15Rik | hypothetical U1-like zinc finger/Zinc finger, C2H2 type containin   |
| Down at 24 hrs | A_65_P19535 | 0.28 | 0.023 |             |               | Intronic in U012878                                                 |
| Down at 24 hrs | A_65_P20890 | 0.28 | 0.009 |             | Tyk2          | Mus musculus tyrosine kinase 2 (Tyk2), mRNA                         |
| Down at 24 hrs | A_65_P15439 | 0.28 | 0.037 | NM_080558.1 | Ssfa2         | Mus musculus sperm specific antigen 2 (Ssfa2), mRNA                 |
| Down at 24 hrs | A_65_P16687 | 0.27 | 0.037 |             | C80287        | UNKNOWN                                                             |
| Down at 24 hrs | A_65_P17563 | 0.27 | 0.030 |             |               | UNKNOWN                                                             |
| Down at 24 hrs | A_65_P18335 | 0.27 | 0.009 |             |               | Intronic in U032918                                                 |
| Down at 24 hrs | A_65_P15928 | 0.27 | 0.035 |             |               | Intronic in U022797                                                 |
| Down at 24 hrs | A_65_P13673 | 0.27 | 0.033 |             |               | Intronic in U043513                                                 |
| Down at 24 hrs | A_65_P19520 | 0.27 | 0.040 | AK054969.1  | Ubr1          | Mus musculus ubiquitin protein ligase E3 component n-recognin 1 (   |
| Down at 24 hrs | A_65_P14982 | 0.26 | 0.008 |             | D7Erd344e     | UNKNOWN                                                             |
| Down at 24 hrs | A_65_P19801 | 0.26 | 0.048 | NM_016710.1 | Nsbp1         | Mus musculus nucleosome binding protein 1 (Nsbp1), mRNA             |
| Down at 24 hrs | A_65_P16330 | 0.26 | 0.044 | XM_127252.1 | 1110037D04Rik | DJ501N12.5.2 (NOVEL PROTEIN, ISOFORM 2) (FRAGMENT) homolog [Homo    |
| Down at 24 hrs | A_65_P16385 | 0.26 | 0.037 | NM_008031.1 | Fmr1          | Mus musculus fragile X mental retardation syndrome 1 homolog (Fmr   |
| Down at 24 hrs | A_65_P14809 | 0.26 | 0.002 |             | AU040958      | REPEAT-SEQUENCE                                                     |
| Down at 24 hrs | A_65_P14991 | 0.26 | 0.005 | XM_134209.1 |               | Mus musculus similar to hypothetical protein BC008207 [Homo sapie   |
| Down at 24 hrs | A_65_P16588 | 0.26 | 0.012 | XM_148254.2 | 3830421G21Rik | PROTEIN ASSOCIATING WITH SMALL STRESS PROTEIN                       |
| Down at 24 hrs | A_65_P19647 | 0.26 | 0.034 | NM_009088.1 | Rpo1-4        | Mus musculus RNA polymerase 1-4 (194 kDa subunit) (Rpo1-4), mRNA    |
| Down at 24 hrs | A_65_P18691 | 0.26 | 0.008 |             |               | Intronic in U038198                                                 |
| Down at 24 hrs | A_65_P17574 | 0.25 | 0.047 | X60289.1    |               | UNKNOWN                                                             |
| Down at 24 hrs | A_65_P13672 | 0.25 | 0.021 |             |               | UNKNOWN                                                             |
| Down at 24 hrs | A_65_P18361 | 0.24 | 0.022 | NM_010881.1 | Ncoa1         | Mus musculus nuclear receptor coactivator 1 (Ncoa1), mRNA           |
| Down at 24 hrs | A_65_P16207 | 0.24 | 0.011 |             |               | REPEAT-SEQUENCE                                                     |



|                |             |      |       |                   |                   |                                                                                                                |
|----------------|-------------|------|-------|-------------------|-------------------|----------------------------------------------------------------------------------------------------------------|
| Down at 24 hrs | A_65_P17632 |      | 0.24  | 0.031             | AI851927          | UNKNOWN                                                                                                        |
| Down at 24 hrs | A_65_P16998 |      | 0.24  | 0.029             | C79491            | UNKNOWN                                                                                                        |
| Down at 24 hrs | A_65_P16212 |      | 0.24  | 0.018             | AI536418          | PHOSPHOLIPASE A-2-ACTIVATING PROTEIN (PLAP). [Source:SWISSPROT;Ac similar to P16H6 (FRAGMENT) [Xenopus laevis] |
| Down at 24 hrs | A_65_P15093 |      | 0.23  | 0.006             | D7Ert413e         | Intronic in U022268                                                                                            |
| Down at 24 hrs | A_65_P15907 |      | 0.23  | 0.032             |                   | Mus musculus expressed sequence AI481500 (AI481500), mRNA                                                      |
| Down at 24 hrs | A_65_P16219 |      | 0.23  | 0.043 BC029023.1  | AI481500          | UNKNOWN                                                                                                        |
| Down at 24 hrs | A_65_P18572 |      | 0.23  | 0.031             |                   | UNKNOWN                                                                                                        |
| Down at 24 hrs | A_65_P15649 |      | 0.23  | 0.012 BC025634.1  | Gng12             | Mus musculus guanine nucleotide binding protein (G protein), gamm                                              |
| Down at 24 hrs | A_65_P18235 |      | 0.23  | 0.002             | C77387            | UNKNOWN                                                                                                        |
| Down at 24 hrs | A_65_P20516 |      | 0.23  | 0.043 AK008366.1  | 2010109K09Rik     | Intronic in U042309                                                                                            |
| Down at 24 hrs | A_65_P15631 |      | 0.22  | 0.012 XM_139631.1 | 4930555P18Rik     | PATCHED RELATED PROTEIN                                                                                        |
| Down at 24 hrs | A_65_P17335 |      | 0.22  | 0.001 NM_025906.1 | 1500011D06Rik     | Mus musculus RIKEN cDNA 1500011D06 gene (1500011D06Rik), mRNA                                                  |
| Down at 24 hrs | A_65_P16879 |      | 0.22  | 0.011             | Prdm15            | Mus musculus PR domain containing 15 (Prdm15), mRNA                                                            |
| Down at 24 hrs | A_65_P15076 |      | 0.22  | 0.015             |                   | Intronic in U023433                                                                                            |
| Down at 24 hrs | A_65_P16493 |      | 0.22  | 0.012 XM_161543.1 |                   | Intronic in U025794                                                                                            |
| Down at 24 hrs | A_65_P15643 |      | 0.22  | 0.015 BC007484.1  | Galnt7            | Mus musculus UDP-N-acetyl-alpha-D-galactosamine: polypeptide N-ac                                              |
| Down at 24 hrs | A_65_P14235 |      | 0.21  | 0.046 XM_130204.2 |                   | STRESS ACTIVATED MAP KINASE INTERACTING PROTEIN 1 SAPK INTERACTIN                                              |
| Down at 24 hrs | A_65_P14573 |      | 0.21  | 0.005             | AI844545          | UNKNOWN                                                                                                        |
| Down at 24 hrs | A_65_P17839 |      | 0.21  | 0.014 NM_152817.1 | 2610511O17Rik     | Mus musculus RIKEN cDNA 2610511O17 gene (2610511O17Rik), mRNA                                                  |
| Down at 24 hrs | A_65_P19072 |      | 0.20  | 0.021 XM_129005.1 | AW536573          | Mus musculus expressed sequence AW536573 (AW536573), mRNA                                                      |
| Down at 24 hrs | A_65_P16119 |      | 0.20  | 0.010             | D10Jhu82e         | UNKNOWN                                                                                                        |
| Down at 24 hrs | A_65_P18301 |      | 0.20  | 0.008 NM_013615.1 | Odf2              | Mus musculus outer dense fiber of sperm tails 2 (Odf2), mRNA                                                   |
| Down at 24 hrs | A_65_P18871 |      | 0.20  | 0.010 NM_023200.1 | Ppp1r7            | Mus musculus protein phosphatase 1, regulatory (inhibitor) subuni                                              |
| Down at 24 hrs | A_65_P16236 |      | 0.20  | 0.035             |                   | UNKNOWN                                                                                                        |
| Down at 24 hrs | A_65_P16957 |      | 0.19  | 0.006 AB058726.1  | 4931428F02Rik     | hypothetical PHD-finger/Cytochrome c family heme-binding site con                                              |
| Down at 24 hrs | A_65_P17538 |      | 0.19  | 0.037             |                   | UNKNOWN                                                                                                        |
| Down at 24 hrs | A_65_P14434 |      | 0.19  | 0.002 BC005447.1  |                   | TRIPARTITE MOTIF PROTEIN 30 DOWN REGULATORY PROTEIN OF INTERLEUKI                                              |
| Down at 24 hrs | A_65_P15254 |      | 0.18  | 0.018 BC031110.1  | Plekha3           | Mus musculus pleckstrin homology domain-containing, family A (pho                                              |
| Down at 24 hrs | A_65_P14041 |      | 0.18  | 0.028 BC016886.1  | Nab1              | Mus musculus Ngfi-A binding protein 1 (Nab1), mRNA                                                             |
| Down at 24 hrs | A_65_P12598 |      | 0.17  | 0.021 NM_007624.1 | Cbx3              | Mus musculus chromobox homolog 3 (Drosophila HP1 gamma) (Cbx3), m                                              |
| Down at 24 hrs | A_65_P18026 |      | 0.17  | 0.038             |                   | UNKNOWN                                                                                                        |
| Down at 24 hrs | A_65_P15817 |      | 0.17  | 0.001 XM_128836.2 | 1110018O12Rik     | COFACTOR                                                                                                       |
| Down at 24 hrs | A_65_P12254 |      | 0.17  | 0.029             |                   | REPEAT-SEQUENCE                                                                                                |
| Down at 24 hrs | A_65_P18169 |      | 0.16  | 0.040 NM_028058.1 | 1500005J14Rik     | Mus musculus RIKEN cDNA 1500005J14 gene (1500005J14Rik), mRNA                                                  |
| Down at 24 hrs | A_65_P19529 |      | 0.16  | 0.049 BC036146.1  | Tfpi              | TISSUE FACTOR PATHWAY INHIBITOR PRECURSOR (TFPI) (LIPOPROTEIN- AS                                              |
| Down at 24 hrs | A_65_P18304 |      | 0.16  | 0.005 XM_125000.1 | Csmd1             | Mus musculus CUB and Sushi multiple domains 1 (Csmd1), mRNA                                                    |
| Down at 24 hrs | A_65_P12149 |      | 0.15  | 0.040             | Arvcf             | UNKNOWN                                                                                                        |
| Down at 24 hrs | A_65_P16506 |      | 0.15  | 0.049             | Calb1             | Mus musculus calbindin-28K (Calb1), mRNA                                                                       |
| Down at 24 hrs | A_65_P14537 |      | 0.14  | 0.002 AF185590.1  | Ccnl              | cyclin L. Possibly wrong strand.                                                                               |
| Down at 24 hrs | A_65_P17434 |      | 0.14  | 0.010 BC027282.1  | AW260253          | Mus musculus, clone IMAGE:3501025, mRNA                                                                        |
| Down at 24 hrs | A_65_P09176 |      | 0.13  | 0.029             |                   | REPEAT-SEQUENCE                                                                                                |
| Down at 24 hrs | A_65_P19615 |      | 0.12  | 0.038 XM_072402.3 | Cops2             | Mus musculus COP9 (constitutive photomorphogenic) homolog, subuni                                              |
| Down at 24 hrs | A_65_P17347 |      | 0.12  | 0.013 NM_026194.2 | 1810074P20Rik     | Mus musculus RIKEN cDNA 1810074P20 gene (1810074P20Rik), mRNA                                                  |
| Down at 24 hrs | A_65_P06699 |      | 0.10  | 0.047             |                   | UNKNOWN                                                                                                        |
| Down at 24 hrs | A_65_P11615 |      | 0.08  | 0.035             |                   | REPEAT-SEQUENCE                                                                                                |
| Down at 24 hrs | A_65_P12284 |      | 0.07  | 0.035             |                   | REPEAT-SEQUENCE                                                                                                |
| Up at both hrs | A_65_P01307 | 4.55 | 0.020 | 4.51              | 0.000             | UNKNOWN                                                                                                        |
| Up at both hrs | A_65_P02531 | 4.55 | 0.016 | 4.18              | 0.006             | UNKNOWN                                                                                                        |
| Up at both hrs | A_65_P00555 | 4.16 | 0.031 | 4.81              | 0.003             | UNKNOWN                                                                                                        |
| Up at both hrs | A_65_P00695 | 4.13 | 0.030 | 3.65              | 0.027 NM_024452.1 | Luzp1                                                                                                          |
| Up at both hrs | A_65_P00834 | 4.07 | 0.041 | 4.03              | 0.015             | Mus musculus leucine zipper protein 1 (Luzp1), mRNA                                                            |
| Up at both hrs | A_65_P06096 | 4.07 | 0.039 | 3.55              | 0.006 NM_009582.1 | C81508                                                                                                         |
| Up at both hrs | A_65_P00552 | 4.04 | 0.002 | 5.05              | 0.000 XM_134080.1 |                                                                                                                |
| Up at both hrs | A_65_P02350 | 3.93 | 0.019 | 4.05              | 0.012             | Intronic in U000342                                                                                            |
| Up at both hrs | A_65_P01314 | 3.83 | 0.011 | 3.00              | 0.011             | UNKNOWN                                                                                                        |
| Up at both hrs | A_65_P05940 | 3.69 | 0.005 | 3.62              | 0.023             | hypothetical Glycosyl transferases group 1 containing protein                                                  |
| Up at both hrs | A_65_P00677 | 3.65 | 0.050 | 3.46              | 0.009             | Intronic in U036052                                                                                            |
| Up at both hrs | A_65_P01025 | 3.62 | 0.030 | 3.31              | 0.008             | UNKNOWN                                                                                                        |
|                |             |      |       |                   |                   | Intronic in U042558                                                                                            |
|                |             |      |       |                   |                   | Intronic in U035943                                                                                            |
|                |             |      |       |                   |                   | UNKNOWN                                                                                                        |

|                |             |      |       |      |       |               |                                                                   |
|----------------|-------------|------|-------|------|-------|---------------|-------------------------------------------------------------------|
| Up at both hrs | A_65_P01698 | 3.58 | 0.036 | 3.59 | 0.007 |               | UNKNOWN                                                           |
| Up at both hrs | A_65_P02549 | 3.53 | 0.023 | 3.83 | 0.001 |               | Intronic in U000758                                               |
| Up at both hrs | A_65_P02461 | 3.52 | 0.026 | 4.54 | 0.003 |               | Intronic in U042432                                               |
| Up at both hrs | A_65_P00673 | 3.50 | 0.022 | 2.59 | 0.038 | 2610207I05Rik | Similar to: Mus musculus RIKEN cDNA 2610207I05 gene (2610207I05Ri |
| Up at both hrs | A_65_P08146 | 3.49 | 0.026 | 3.94 | 0.043 | AJ251154.1    | Intronic in U015371                                               |
| Up at both hrs | A_65_P01058 | 3.48 | 0.002 | 2.76 | 0.032 |               | Intronic in U006580                                               |
| Up at both hrs | A_65_P01606 | 3.45 | 0.021 | 3.41 | 0.003 |               | Intronic in U004031                                               |
| Up at both hrs | A_65_P02552 | 3.42 | 0.043 | 4.38 | 0.003 |               | UNKNOWN                                                           |
| Up at both hrs | A_65_P06997 | 3.34 | 0.007 | 3.71 | 0.012 |               | UNKNOWN                                                           |
| Up at both hrs | A_65_P08228 | 3.34 | 0.050 | 4.20 | 0.014 |               | Intronic in U006515                                               |
| Up at both hrs | A_65_P05958 | 3.33 | 0.025 | 3.99 | 0.008 | XM_131859.2   | UNKNOWN                                                           |
| Up at both hrs | A_65_P06424 | 3.29 | 0.007 | 2.66 | 0.050 | XM_128905.1   | TRANSCRIPTION INITIATION FACTOR TFIID KDA SUBUNIT TAFII           |
| Up at both hrs | A_65_P02165 | 3.29 | 0.018 | 3.59 | 0.008 |               | UNKNOWN                                                           |
| Up at both hrs | A_65_P07647 | 3.28 | 0.022 | 3.85 | 0.029 | AF088904.1    | UNKNOWN                                                           |
| Up at both hrs | A_65_P02449 | 3.27 | 0.008 | 3.55 | 0.012 |               | UNKNOWN                                                           |
| Up at both hrs | A_65_P00578 | 3.26 | 0.013 | 3.31 | 0.011 | XM_178082.1   | UNKNOWN                                                           |
| Up at both hrs | A_65_P01612 | 3.26 | 0.044 | 3.97 | 0.007 |               | UNKNOWN                                                           |
| Up at both hrs | A_65_P00547 | 3.24 | 0.005 | 3.56 | 0.011 |               | Intronic in U010915                                               |
| Up at both hrs | A_65_P06755 | 3.23 | 0.033 | 4.04 | 0.018 |               | UNKNOWN                                                           |
| Up at both hrs | A_65_P05293 | 3.23 | 0.007 | 3.71 | 0.011 |               | CALCIUM/CALMODULIN-DEPENDENT PROTEIN KINASE TYPE IV CATALYTIC CHA |
| Up at both hrs | A_65_P02080 | 3.20 | 0.016 | 3.89 | 0.000 | NM_172273.1   | Similar to: Mus musculus hypothetical protein MGC49785 (MGC49785) |
| Up at both hrs | A_65_P05538 | 3.19 | 0.008 | 3.21 | 0.008 |               | Intronic in U034619                                               |
| Up at both hrs | A_65_P03593 | 3.15 | 0.034 | 3.85 | 0.019 |               | Intronic in U037050                                               |
| Up at both hrs | A_65_P15028 | 3.15 | 0.020 | 3.30 | 0.012 |               | Intronic in U013991                                               |
| Up at both hrs | A_65_P05322 | 3.13 | 0.034 | 2.58 | 0.050 |               | Intronic in U035638                                               |
| Up at both hrs | A_65_P04568 | 3.12 | 0.019 | 4.27 | 0.003 |               | UNKNOWN                                                           |
| Up at both hrs | A_65_P02366 | 3.12 | 0.038 | 2.09 | 0.034 |               | Intronic in U025194                                               |
| Up at both hrs | A_65_P02547 | 3.10 | 0.014 | 3.39 | 0.009 | NM_013571.1   | Mus musculus kinase suppressor of ras (Ksr), mRNA                 |
| Up at both hrs | A_65_P02190 | 3.07 | 0.049 | 3.62 | 0.007 |               | UNKNOWN                                                           |
| Up at both hrs | A_65_P02537 | 3.05 | 0.041 | 3.68 | 0.014 |               | Elp4                                                              |
| Up at both hrs | A_65_P03500 | 3.05 | 0.035 | 4.15 | 0.021 |               | Intronic in U025194                                               |
| Up at both hrs | A_65_P05103 | 3.02 | 0.008 | 3.54 | 0.028 | XM_158024.1   | UNKNOWN                                                           |
| Up at both hrs | A_65_P03909 | 3.01 | 0.008 | 3.21 | 0.025 |               | AW125737                                                          |
| Up at both hrs | A_65_P04532 | 3.00 | 0.017 | 4.11 | 0.006 |               | Mus musculus phosphodiesterase 1A, calmodulin-dependent (Pde1a),  |
| Up at both hrs | A_65_P02454 | 3.00 | 0.031 | 3.51 | 0.019 |               | UNKNOWN                                                           |
| Up at both hrs | A_65_P04351 | 2.97 | 0.045 | 3.56 | 0.017 |               | UNKNOWN                                                           |
| Up at both hrs | A_65_P07145 | 2.95 | 0.046 | 2.69 | 0.048 | XM_135206.1   | Mus musculus LOC235617 (LOC235617), mRNA                          |
| Up at both hrs | A_65_P02276 | 2.95 | 0.035 | 3.51 | 0.001 |               | UNKNOWN                                                           |
| Up at both hrs | A_65_P09733 | 2.95 | 0.002 | 2.58 | 0.035 |               | UNKNOWN                                                           |
| Up at both hrs | A_65_P02067 | 2.95 | 0.027 | 3.74 | 0.019 |               | REPEAT-SEQUENCE                                                   |
| Up at both hrs | A_65_P02361 | 2.92 | 0.034 | 3.82 | 0.009 |               | UNKNOWN                                                           |
| Up at both hrs | A_65_P05870 | 2.89 | 0.037 | 3.44 | 0.008 | NM_010178.1   | UNKNOWN                                                           |
| Up at both hrs | A_65_P06054 | 2.88 | 0.022 | 3.23 | 0.005 |               | UNKNOWN                                                           |
| Up at both hrs | A_65_P06278 | 2.87 | 0.007 | 3.74 | 0.030 | NM_011446.1   | Mus musculus SRY-box containing gene 7 (Sox7), mRNA               |
| Up at both hrs | A_65_P06526 | 2.86 | 0.046 | 3.67 | 0.008 | XM_127927.1   | Similar to: Mus musculus. Similar to hypothetical protein FLJ1023 |
| Up at both hrs | A_65_P05775 | 2.86 | 0.001 | 2.97 | 0.008 | NM_023197.1   | Mus musculus RIKEN cDNA 2310008H09 gene (2310008H09Rik), mRNA     |
| Up at both hrs | A_65_P06437 | 2.86 | 0.024 | 3.18 | 0.033 |               | Intronic in U003979                                               |
| Up at both hrs | A_65_P08215 | 2.86 | 0.020 | 2.75 | 0.025 | XM_123239.1   | Mus musculus protocadherin 12 (Pcdh12), mRNA                      |
| Up at both hrs | A_65_P04633 | 2.84 | 0.039 | 2.90 | 0.024 |               | UNKNOWN                                                           |
| Up at both hrs | A_65_P08219 | 2.82 | 0.038 | 2.32 | 0.048 |               | Intronic in U034507                                               |
| Up at both hrs | A_65_P02586 | 2.82 | 0.039 | 3.14 | 0.012 | AL834396.1    | FORMIN LIKE PROTEIN PROTEIN                                       |
| Up at both hrs | A_65_P05189 | 2.82 | 0.020 | 2.98 | 0.025 |               | UNKNOWN                                                           |
| Up at both hrs | A_65_P04756 | 2.81 | 0.013 | 3.64 | 0.019 |               | Mus musculus nuclear receptor co-repressor 1 (Ncor1), mRNA        |
| Up at both hrs | A_65_P05848 | 2.81 | 0.004 | 2.46 | 0.028 |               | Similar to: Mus musculus adult male testis cDNA, RIKEN full-lengt |
| Up at both hrs | A_65_P03111 | 2.81 | 0.023 | 3.77 | 0.014 | AK003491.1    | Mus musculus 18 days embryo whole body cDNA, RIKEN full-length en |
| Up at both hrs | A_65_P00859 | 2.81 | 0.043 | 3.09 | 0.002 |               | Intronic in U023076                                               |
| Up at both hrs | A_65_P00872 | 2.80 | 0.040 | 3.46 | 0.001 |               | UNKNOWN                                                           |
| Up at both hrs | A_65_P00564 | 2.79 | 0.002 | 3.56 | 0.012 |               | UNKNOWN                                                           |

|                |             |      |       |      |       |             |               |                                                                   |
|----------------|-------------|------|-------|------|-------|-------------|---------------|-------------------------------------------------------------------|
| Up at both hrs | A_65_P05494 | 2.79 | 0.015 | 3.36 | 0.014 | AK004158.1  | 1110038H03Rik | Intronic in U033857                                               |
| Up at both hrs | A_65_P02624 | 2.79 | 0.040 | 3.66 | 0.047 |             |               | UNKNOWN                                                           |
| Up at both hrs | A_65_P05569 | 2.79 | 0.009 | 3.48 | 0.002 | NM_133766.1 | C920006C10Rik | Mus musculus RIKEN cDNA C920006C10 gene (C920006C10Rik), mRNA     |
| Up at both hrs | A_65_P02445 | 2.79 | 0.046 | 3.01 | 0.047 |             | D6Ert490e     | UNKNOWN                                                           |
| Up at both hrs | A_65_P09845 | 2.79 | 0.047 | 3.41 | 0.007 |             |               | Intronic in U027095                                               |
| Up at both hrs | A_65_P06765 | 2.79 | 0.034 | 2.93 | 0.005 |             |               | UNKNOWN                                                           |
| Up at both hrs | A_65_P02783 | 2.79 | 0.010 | 2.05 | 0.042 |             |               | Intronic in U002577                                               |
| Up at both hrs | A_65_P00659 | 2.78 | 0.011 | 3.58 | 0.004 |             |               | Intronic in U023077                                               |
| Up at both hrs | A_65_P05394 | 2.78 | 0.002 | 3.51 | 0.013 | NM_080837.1 | Il25          | Mus musculus interleukin 25 (Il25), mRNA                          |
| Up at both hrs | A_65_P05865 | 2.77 | 0.026 | 2.70 | 0.025 | M29449.1    | mim-1         | ERROR:Non-Mouse Gene:Chicken myeloid protein (mim-1) mRNA, comple |
| Up at both hrs | A_65_P00569 | 2.77 | 0.038 | 4.29 | 0.002 | XM_128580.1 | Zfp101        | ZINC FINGER PROTEIN 101. [Source:RefSeq;Acc:NM_009542]            |
| Up at both hrs | A_65_P12180 | 2.77 | 0.010 | 3.14 | 0.013 |             |               | hypothetical ARM repeat structure containing protein              |
| Up at both hrs | A_65_P00576 | 2.74 | 0.003 | 2.36 | 0.010 |             |               | Intronic in U042035                                               |
| Up at both hrs | A_65_P06520 | 2.74 | 0.011 | 2.72 | 0.033 |             |               | UNKNOWN                                                           |
| Up at both hrs | A_65_P02181 | 2.73 | 0.021 | 3.66 | 0.003 | NM_013904.1 | Hey2          | Mus musculus hairy/enhancer-of-split related with YRPW motif 2 (H |
| Up at both hrs | A_65_P05768 | 2.72 | 0.044 | 3.07 | 0.008 |             |               | UNKNOWN                                                           |
| Up at both hrs | A_65_P02869 | 2.72 | 0.023 | 3.58 | 0.001 |             |               | UNKNOWN                                                           |
| Up at both hrs | A_65_P02864 | 2.71 | 0.007 | 3.83 | 0.005 |             |               | UNKNOWN                                                           |
| Up at both hrs | A_65_P03392 | 2.70 | 0.009 | 3.53 | 0.010 |             |               | Intronic in U024563                                               |
| Up at both hrs | A_65_P07264 | 2.68 | 0.048 | 3.00 | 0.002 |             |               | UNKNOWN                                                           |
| Up at both hrs | A_65_P03039 | 2.68 | 0.027 | 2.17 | 0.000 | NM_172977.1 | 5330400C03    | TRANSCRIPTION FACTOR                                              |
| Up at both hrs | A_65_P02955 | 2.67 | 0.012 | 3.36 | 0.004 |             | Vav3          | Mus musculus vav 3 oncogene (Vav3), mRNA                          |
| Up at both hrs | A_65_P03931 | 2.66 | 0.045 | 4.40 | 0.001 |             |               | Intronic in U027499                                               |
| Up at both hrs | A_65_P05947 | 2.66 | 0.020 | 3.09 | 0.017 | NM_053124.1 | Smarca5       | Mus musculus SWI/SNF related, matrix associated, actin dependent  |
| Up at both hrs | A_65_P01144 | 2.66 | 0.011 | 1.96 | 0.030 | AL834141.1  |               | Mus musculus LOC269324 (LOC269324), mRNA                          |
| Up at both hrs | A_65_P02893 | 2.65 | 0.026 | 3.60 | 0.041 |             |               | Intronic in U018631                                               |
| Up at both hrs | A_65_P01042 | 2.65 | 0.016 | 2.79 | 0.007 | XM_127379.1 | AA420405      | Mus musculus hypothetical protein MGC38585 (MGC38585), mRNA       |
| Up at both hrs | A_65_P01081 | 2.64 | 0.012 | 2.39 | 0.030 | XM_132170.1 | Gc            | VITAMIN D-BINDING PROTEIN PRECURSOR (DBP) (GROUP-SPECIFIC COMPONE |
| Up at both hrs | A_65_P02284 | 2.64 | 0.029 | 3.47 | 0.001 |             |               | Intronic in U017147                                               |
| Up at both hrs | A_65_P01006 | 2.63 | 0.019 | 3.63 | 0.008 |             |               | Intronic in U020364                                               |
| Up at both hrs | A_65_P03778 | 2.63 | 0.006 | 3.61 | 0.029 |             |               | UNKNOWN                                                           |
| Up at both hrs | A_65_P04816 | 2.62 | 0.020 | 3.11 | 0.015 |             |               | UNKNOWN                                                           |
| Up at both hrs | A_65_P00748 | 2.62 | 0.003 | 3.58 | 0.010 |             |               | UNKNOWN                                                           |
| Up at both hrs | A_65_P06128 | 2.61 | 0.029 | 2.71 | 0.004 | AK012913.1  | 2810047E18Rik | Intronic in U012391                                               |
| Up at both hrs | A_65_P00936 | 2.61 | 0.029 | 3.78 | 0.012 |             |               | UNKNOWN                                                           |
| Up at both hrs | A_65_P01240 | 2.61 | 0.034 | 2.59 | 0.015 |             |               | Intronic in U035818                                               |
| Up at both hrs | A_65_P01506 | 2.60 | 0.020 | 2.29 | 0.015 | NM_010512.1 | Igf1          | Mus musculus insulin-like growth factor 1 (Igf1), mRNA            |
| Up at both hrs | A_65_P02169 | 2.59 | 0.030 | 2.56 | 0.009 |             | 2810046L04Rik | Mus musculus similar to hypothetical protein FLJ12661 [Homo sapie |
| Up at both hrs | A_65_P06970 | 2.58 | 0.047 | 3.35 | 0.005 |             |               | UNKNOWN                                                           |
| Up at both hrs | A_65_P02909 | 2.57 | 0.031 | 3.33 | 0.034 | NM_146185.1 | MGC6654       | Mus musculus hypothetical protein MGC6654 (MGC6654), mRNA         |
| Up at both hrs | A_65_P12661 | 2.57 | 0.029 | 2.05 | 0.035 |             |               | Mus musculus similar to UBF transcription factor, short form - ra |
| Up at both hrs | A_65_P02540 | 2.56 | 0.032 | 2.96 | 0.047 |             | AU022409      | UNKNOWN                                                           |
| Up at both hrs | A_65_P03218 | 2.56 | 0.025 | 3.45 | 0.015 |             |               | UNKNOWN                                                           |
| Up at both hrs | A_65_P10188 | 2.56 | 0.035 | 1.82 | 0.010 |             |               | Intronic in U016128                                               |
| Up at both hrs | A_65_P05803 | 2.55 | 0.041 | 2.95 | 0.017 |             | C87580        | UNKNOWN                                                           |
| Up at both hrs | A_65_P05778 | 2.55 | 0.039 | 2.64 | 0.012 | BC027199.1  | MGC28646      | Mus musculus hypothetical protein MGC28646 (MGC28646), mRNA       |
| Up at both hrs | A_65_P05629 | 2.55 | 0.022 | 2.04 | 0.041 |             |               | UNKNOWN                                                           |
| Up at both hrs | A_65_P01345 | 2.55 | 0.033 | 2.53 | 0.037 |             |               | UNKNOWN                                                           |
| Up at both hrs | A_65_P00572 | 2.55 | 0.001 | 2.77 | 0.002 |             |               | Intronic in U000941                                               |
| Up at both hrs | A_65_P01603 | 2.54 | 0.010 | 2.20 | 0.002 |             |               | UNKNOWN                                                           |
| Up at both hrs | A_65_P04800 | 2.54 | 0.025 | 3.97 | 0.027 |             |               | UNKNOWN                                                           |
| Up at both hrs | A_65_P03876 | 2.53 | 0.005 | 3.17 | 0.027 |             |               | UNKNOWN                                                           |
| Up at both hrs | A_65_P03592 | 2.53 | 0.043 | 3.13 | 0.031 |             |               | UNKNOWN                                                           |
| Up at both hrs | A_65_P10605 | 2.52 | 0.027 | 2.29 | 0.025 |             |               | Intronic in U042100                                               |
| Up at both hrs | A_65_P01529 | 2.50 | 0.029 | 3.03 | 0.022 | NM_009897.1 | Ckmt1         | Mus musculus creatine kinase, mitochondrial 1, ubiquitous (Ckmt1) |
| Up at both hrs | A_65_P04683 | 2.50 | 0.048 | 3.56 | 0.017 | XM_158431.1 |               | UNKNOWN                                                           |
| Up at both hrs | A_65_P00827 | 2.50 | 0.004 | 3.76 | 0.045 |             |               | UNKNOWN                                                           |
| Up at both hrs | A_65_P03579 | 2.50 | 0.047 | 3.38 | 0.007 |             |               | Intronic in U003167                                               |



|                |             |      |       |      |                   |                     |                                                                   |
|----------------|-------------|------|-------|------|-------------------|---------------------|-------------------------------------------------------------------|
| Up at both hrs | A_65_P04542 | 2.29 | 0.018 | 2.43 | 0.029             | Zfp207              | Mus musculus zinc finger protein 207 (Zfp207), mRNA               |
| Up at both hrs | A_65_P06083 | 2.28 | 0.025 | 2.21 | 0.019             |                     | UNKNOWN                                                           |
| Up at both hrs | A_65_P01524 | 2.28 | 0.033 | 2.59 | 0.019             |                     | UNKNOWN                                                           |
| Up at both hrs | A_65_P05088 | 2.27 | 0.012 | 2.61 | 0.039             |                     | UNKNOWN                                                           |
| Up at both hrs | A_65_P09248 | 2.27 | 0.012 | 2.44 | 0.006             | C77626              | UNKNOWN                                                           |
| Up at both hrs | A_65_P00571 | 2.27 | 0.007 | 2.06 | 0.027 NM_010688.1 | Lasp1               | Mus musculus LIM and SH3 protein 1 (Lasp1), mRNA                  |
| Up at both hrs | A_65_P01112 | 2.26 | 0.006 | 3.07 | 0.026             |                     | UNKNOWN                                                           |
| Up at both hrs | A_65_P02087 | 2.26 | 0.025 | 2.73 | 0.020 XM_132526.2 | Al646570            | 49J10.1.2 (ANDROGEN-INDUCED PROSTATE PROLIFERATIVE SHUTOFF ASSOCI |
| Up at both hrs | A_65_P01731 | 2.26 | 0.038 | 2.86 | 0.015             |                     | Intronic in U038947                                               |
| Up at both hrs | A_65_P02710 | 2.26 | 0.046 | 2.46 | 0.039 NM_026206.1 | 1600017N11Rik       | Mus musculus RIKEN cDNA 1600017N11 gene (1600017N11Rik), mRNA     |
| Up at both hrs | A_65_P03419 | 2.26 | 0.034 | 2.26 | 0.010 XM_159290.1 |                     | UNKNOWN                                                           |
| Up at both hrs | A_65_P00885 | 2.26 | 0.006 | 2.16 | 0.042             |                     | Intronic in U003893                                               |
| Up at both hrs | A_65_P06435 | 2.25 | 0.002 | 2.91 | 0.012             |                     | UNKNOWN                                                           |
| Up at both hrs | A_65_P10111 | 2.24 | 0.025 | 2.36 | 0.028             | AU015619            | UNKNOWN                                                           |
| Up at both hrs | A_65_P07003 | 2.24 | 0.014 | 2.74 | 0.013 XM_181323.1 | 2310015K15Rik       | Mus musculus purine rich element binding protein B (Purb), mRNA   |
| Up at both hrs | A_65_P04728 | 2.24 | 0.039 | 2.44 | 0.001             |                     | Intronic in U027680                                               |
| Up at both hrs | A_65_P04148 | 2.24 | 0.007 | 2.48 | 0.026             |                     | Intronic in U033433                                               |
| Up at both hrs | A_65_P00548 | 2.24 | 0.007 | 2.38 | 0.035 NM_009280.1 | Ss18                | Mus musculus synovial sarcoma translocation, Chromosome 18 (Ss18) |
| Up at both hrs | A_65_P02646 | 2.24 | 0.036 | 2.55 | 0.016             |                     | UNKNOWN                                                           |
| Up at both hrs | A_65_P02861 | 2.24 | 0.045 | 2.89 | 0.008             |                     | Intronic in U000342                                               |
| Up at both hrs | A_65_P02759 | 2.23 | 0.005 | 3.14 | 0.002             |                     | Intronic in U038082                                               |
| Up at both hrs | A_65_P02377 | 2.23 | 0.014 | 2.57 | 0.005             |                     | UNKNOWN                                                           |
| Up at both hrs | A_65_P02815 | 2.23 | 0.041 | 2.90 | 0.027             |                     | Intronic in U001642                                               |
| Up at both hrs | A_65_P02588 | 2.23 | 0.039 | 2.45 | 0.014 NM_010139.1 | Epha2               | Mus musculus Eph receptor A2 (Epha2), mRNA                        |
| Up at both hrs | A_65_P00544 | 2.23 | 0.030 | 3.06 | 0.007             | 2810446M09Rik;Erp29 | Mus musculus endoplasmic reticulum protein 29 (Erp29), mRNA       |
| Up at both hrs | A_65_P06242 | 2.23 | 0.029 | 2.09 | 0.002 U43714.1    | Hand1               | Mus musculus heart and neural crest derivatives expressed transcr |
| Up at both hrs | A_65_P03725 | 2.22 | 0.047 | 3.62 | 0.002             |                     | Intronic in U034331                                               |
| Up at both hrs | A_65_P17498 | 2.22 | 0.003 | 2.46 | 0.028             |                     | UNKNOWN                                                           |
| Up at both hrs | A_65_P01620 | 2.21 | 0.015 | 2.34 | 0.013             |                     | Intronic in U004332                                               |
| Up at both hrs | A_65_P02776 | 2.21 | 0.007 | 3.43 | 0.009 XM_143749.1 |                     | UNKNOWN                                                           |
| Up at both hrs | A_65_P01044 | 2.20 | 0.045 | 2.49 | 0.042             | AU043594            | Similar to: Mus musculus neuronal tryptophan hydroxylase (Ntph),  |
| Up at both hrs | A_65_P04516 | 2.20 | 0.042 | 2.84 | 0.020             |                     | UNKNOWN                                                           |
| Up at both hrs | A_65_P01609 | 2.20 | 0.024 | 2.04 | 0.004 AK011873.1  | 2610204B21Rik       | Intronic in U012373                                               |
| Up at both hrs | A_65_P03074 | 2.20 | 0.028 | 2.93 | 0.005             | 4930500E24Rik       | GAS 2 RELATED PROTEIN ON CHROMOSOME 22 GAR22                      |
| Up at both hrs | A_65_P02450 | 2.20 | 0.026 | 2.34 | 0.016 XM_134410.2 | 4631422C05Rik       | ALANINE AMINOTRANSFERASE EC 2.6.1.2 GLUTAMIC PYRUVIC TRANSAMINASE |
| Up at both hrs | A_65_P06977 | 2.20 | 0.042 | 2.84 | 0.007 NM_025653.1 | 3110001I22Rik       | Mus musculus RIKEN cDNA 3110001I22 gene (3110001I22Rik), mRNA     |
| Up at both hrs | A_65_P06423 | 2.19 | 0.035 | 2.39 | 0.023             |                     | Intronic in U033628                                               |
| Up at both hrs | A_65_P02575 | 2.19 | 0.029 | 2.88 | 0.004 XM_123496.1 | Crtr1-pending       | Mus musculus Tcfcp2-related transcriptional repressor 1 (Crtr1-pe |
| Up at both hrs | A_65_P09182 | 2.19 | 0.047 | 2.30 | 0.034             |                     | UNKNOWN                                                           |
| Up at both hrs | A_65_P07046 | 2.19 | 0.011 | 3.14 | 0.002             | D11Ert49e           | UNKNOWN                                                           |
| Up at both hrs | A_65_P02635 | 2.18 | 0.041 | 2.93 | 0.029             |                     | Similar to: Mus musculus 12 days embryo spinal ganglion cDNA, RIK |
| Up at both hrs | A_65_P07887 | 2.18 | 0.047 | 2.18 | 0.043 XM_135026.1 |                     | UNKNOWN                                                           |
| Up at both hrs | A_65_P05232 | 2.17 | 0.029 | 2.04 | 0.023             |                     | REPEAT-SEQUENCE                                                   |
| Up at both hrs | A_65_P01943 | 2.17 | 0.033 | 2.14 | 0.046 AK004211.1  | 1110049L02Rik       | Mus musculus 18 days embryo whole body cDNA, RIKEN full-length en |
| Up at both hrs | A_65_P08778 | 2.17 | 0.005 | 1.95 | 0.003             |                     | Intronic in U022566                                               |
| Up at both hrs | A_65_P04284 | 2.16 | 0.016 | 3.54 | 0.002             | Arts1               | Mus musculus type 1 tumor necrosis factor receptor shedding amino |
| Up at both hrs | A_65_P02264 | 2.16 | 0.024 | 2.49 | 0.026             | D5Ert4189e          | T BOX TRANSCRIPTION FACTOR T BOX PROTEIN                          |
| Up at both hrs | A_65_P09113 | 2.16 | 0.034 | 2.11 | 0.038             |                     | UNKNOWN                                                           |
| Up at both hrs | A_65_P01337 | 2.15 | 0.046 | 2.87 | 0.008 NM_145962.1 | Pank3               | Mus musculus pantothenate kinase 3 (Pank3), mRNA                  |
| Up at both hrs | A_65_P06148 | 2.15 | 0.007 | 2.81 | 0.006 XM_129035.1 |                     | Mus musculus similar to hypothetical protein FLJ21610 [Homo sapie |
| Up at both hrs | A_65_P05001 | 2.15 | 0.018 | 2.40 | 0.037             | C86231              | UNKNOWN                                                           |
| Up at both hrs | A_65_P03399 | 2.14 | 0.005 | 3.18 | 0.018             |                     | UNKNOWN                                                           |
| Up at both hrs | A_65_P06332 | 2.14 | 0.010 | 2.11 | 0.049             | B230117O15Rik       | Similar to: Mus musculus adult male corpora quadrigemina cDNA, RI |
| Up at both hrs | A_65_P00629 | 2.14 | 0.036 | 3.63 | 0.038             |                     | Intronic in U026967                                               |
| Up at both hrs | A_65_P01707 | 2.14 | 0.023 | 2.40 | 0.043 XM_148728.1 | Gbe1                | Mus musculus glucan (1,4-alpha-), branching enzyme 1 (Gbe1), mRNA |
| Up at both hrs | A_65_P06639 | 2.14 | 0.009 | 2.09 | 0.008 BC024684.1  | Mapk6               | Mus musculus mitogen-activated protein kinase 6 (Mapk6), mRNA     |
| Up at both hrs | A_65_P03331 | 2.13 | 0.029 | 3.07 | 0.002             |                     | weakly similar to KIAA1328 PROTEIN (FRAGMENT) [Homo sapiens]      |
| Up at both hrs | A_65_P02257 | 2.13 | 0.025 | 2.09 | 0.032             |                     | UNKNOWN                                                           |

|                |             |      |       |      |                   |               |                                                                            |
|----------------|-------------|------|-------|------|-------------------|---------------|----------------------------------------------------------------------------|
| Up at both hrs | A_65_P09590 | 2.13 | 0.006 | 1.27 | 0.047             | Mre11a        | Mus musculus meiotic recombination 11 homolog A ( <i>S. cerevisiae</i> ) ( |
| Up at both hrs | A_65_P05225 | 2.13 | 0.010 | 2.55 | 0.021             |               | Intronic in U003621                                                        |
| Up at both hrs | A_65_P06914 | 2.12 | 0.003 | 2.48 | 0.023             |               | Intronic in U009368                                                        |
| Up at both hrs | A_65_P00883 | 2.12 | 0.013 | 2.24 | 0.026             |               | UNKNOWN                                                                    |
| Up at both hrs | A_65_P04918 | 2.12 | 0.035 | 1.98 | 0.037 BC023061.1  | 1500009C09Rik | Mus musculus RIKEN cDNA 1500009C09 gene (1500009C09Rik), mRNA              |
| Up at both hrs | A_65_P03502 | 2.12 | 0.016 | 2.75 | 0.021             | D4ErtD264e    | UNKNOWN                                                                    |
| Up at both hrs | A_65_P06912 | 2.12 | 0.026 | 2.43 | 0.036 NM_025599.1 | 2610528E23Rik | Mus musculus RIKEN cDNA 2610528E23 gene (2610528E23Rik), mRNA              |
| Up at both hrs | A_65_P02593 | 2.11 | 0.033 | 1.43 | 0.042 XM_149845.2 | 2210408F21Rik | Mus musculus RIKEN cDNA 2210408F21 gene (2210408F21Rik), mRNA              |
| Up at both hrs | A_65_P05586 | 2.11 | 0.009 | 2.55 | 0.013 AK074915.1  | Igf2bp1       | Mus musculus insulin-like growth factor 2, binding protein 1 (Igf          |
| Up at both hrs | A_65_P03393 | 2.11 | 0.015 | 2.49 | 0.041 AF190991.1  | Ttyh1         | Mus musculus tweety homolog 1 ( <i>Drosophila</i> ) (Ttyh1), mRNA          |
| Up at both hrs | A_65_P02311 | 2.11 | 0.006 | 2.37 | 0.031             | D1ErtD8e      | similar to CDNA FLJ31322 FIS, CLONE LIVER2000033, WEAKLY SIMILAR           |
| Up at both hrs | A_65_P00662 | 2.10 | 0.026 | 2.73 | 0.047 NM_007898.1 | Ebp           | Mus musculus phenylalkylamine Ca2+ antagonist (emopamil) binding           |
| Up at both hrs | A_65_P04143 | 2.10 | 0.000 | 2.45 | 0.013 NM_009395.1 | Tnfaip1       | Mus musculus tumor necrosis factor, alpha-induced protein 1 (endo          |
| Up at both hrs | A_65_P06584 | 2.10 | 0.041 | 2.33 | 0.012 BC011121.1  | Siat4c        | Mus musculus sialyltransferase 4C (beta-galactosidase alpha-2,3-s          |
| Up at both hrs | A_65_P04956 | 2.10 | 0.021 | 3.53 | 0.000             |               | UNKNOWN                                                                    |
| Up at both hrs | A_65_P08996 | 2.09 | 0.024 | 2.09 | 0.008             |               | REPEAT-SEQUENCE                                                            |
| Up at both hrs | A_65_P03687 | 2.09 | 0.013 | 1.83 | 0.020 NM_028106.1 | 2610005H11Rik | Mus musculus RIKEN cDNA 2610005H11 gene (2610005H11Rik), mRNA              |
| Up at both hrs | A_65_P00542 | 2.09 | 0.041 | 3.13 | 0.034             |               | Intronic in U021831                                                        |
| Up at both hrs | A_65_P03106 | 2.09 | 0.005 | 2.80 | 0.041 BC026590.1  |               | hypothetical Single hybrid motif structure containing protein              |
| Up at both hrs | A_65_P01367 | 2.09 | 0.032 | 2.43 | 0.018 XM_129334.2 | 9130011E15Rik | 60S RIBOSOMAL PROTEIN                                                      |
| Up at both hrs | A_65_P02260 | 2.09 | 0.010 | 2.46 | 0.007             |               | UNKNOWN                                                                    |
| Up at both hrs | A_65_P02029 | 2.08 | 0.009 | 2.40 | 0.005 NM_028834.1 | 2210009G21Rik | Mus musculus RIKEN cDNA 2210009G21 gene (2210009G21Rik), mRNA              |
| Up at both hrs | A_65_P00657 | 2.08 | 0.050 | 3.14 | 0.035             |               | Intronic in U033109                                                        |
| Up at both hrs | A_65_P03496 | 2.08 | 0.022 | 2.85 | 0.027             | 2510010F15Rik | Mus musculus RIKEN cDNA 2510010F15 gene (2510010F15Rik), mRNA              |
| Up at both hrs | A_65_P03291 | 2.07 | 0.018 | 2.67 | 0.008             | Sh3glb1       | Mus musculus SH3-domain GRB2-like B1 (endophilin) (Sh3glb1), mRNA          |
| Up at both hrs | A_65_P07462 | 2.07 | 0.004 | 1.77 | 0.032             |               | UNKNOWN                                                                    |
| Up at both hrs | A_65_P02578 | 2.06 | 0.043 | 1.95 | 0.029             |               | Intronic in U010901                                                        |
| Up at both hrs | A_65_P00756 | 2.06 | 0.022 | 2.94 | 0.008             |               | UNKNOWN                                                                    |
| Up at both hrs | A_65_P03117 | 2.06 | 0.000 | 2.59 | 0.020 NM_172476.1 | C230064B05    | CDNA: FLJ21240 FIS, CLONE COL01132 homolog [ <i>Homo sapiens</i> ]         |
| Up at both hrs | A_65_P04743 | 2.06 | 0.031 | 2.69 | 0.015             |               | UNKNOWN                                                                    |
| Up at both hrs | A_65_P00854 | 2.06 | 0.005 | 2.08 | 0.013 XM_181444.1 | Wdr13         | REPEAT-SEQUENCE                                                            |
| Up at both hrs | A_65_P02083 | 2.05 | 0.035 | 2.21 | 0.034 NM_011135.1 | Cnot7         | Mus musculus CCR4-NOT transcription complex, subunit 7 (Cnot7), m          |
| Up at both hrs | A_65_P00598 | 2.05 | 0.024 | 1.59 | 0.016 BC031369.1  | R74720        | Mus musculus GRP1 binding protein GRSP1 (GRSP1), mRNA                      |
| Up at both hrs | A_65_P04964 | 2.05 | 0.003 | 3.06 | 0.004             |               | UNKNOWN                                                                    |
| Up at both hrs | A_65_P04563 | 2.05 | 0.002 | 2.35 | 0.002 BC026471.1  | LOC269424     | Similar to: Mus musculus RIKEN cDNA D530048A03 gene (D530048A03Ri          |
| Up at both hrs | A_65_P06476 | 2.05 | 0.006 | 2.19 | 0.011             | D4ErtD199e    | REPEAT-SEQUENCE                                                            |
| Up at both hrs | A_65_P07053 | 2.05 | 0.007 | 2.66 | 0.007 BC028971.1  | 3110050O07Rik | Mus musculus maternally expressed gene 3 (Meg3), mRNA                      |
| Up at both hrs | A_65_P09192 | 2.05 | 0.003 | 2.38 | 0.039             | C87882        | hypothetical Pleckstrin homology (PH) domain/RA domain containing          |
| Up at both hrs | A_65_P00752 | 2.04 | 0.019 | 2.30 | 0.022             |               | Intronic in U032155                                                        |
| Up at both hrs | A_65_P11806 | 2.04 | 0.037 | 2.82 | 0.015             |               | UNKNOWN                                                                    |
| Up at both hrs | A_65_P10235 | 2.03 | 0.024 | 2.41 | 0.047             |               | UNKNOWN                                                                    |
| Up at both hrs | A_65_P04724 | 2.03 | 0.016 | 2.29 | 0.029             |               | Intronic in U035266                                                        |
| Up at both hrs | A_65_P00761 | 2.03 | 0.034 | 1.87 | 0.032             |               | UNKNOWN                                                                    |
| Up at both hrs | A_65_P03688 | 2.03 | 0.022 | 2.47 | 0.027             | C78330        | Intronic in U018443                                                        |
| Up at both hrs | A_65_P06353 | 2.02 | 0.034 | 1.96 | 0.017 NM_019737.1 | B4galt6       | UNKNOWN                                                                    |
| Up at both hrs | A_65_P05295 | 2.02 | 0.032 | 1.98 | 0.031 NM_010838.1 | Mapt          | Mus musculus microtubule-associated protein tau (Mapt), mRNA               |
| Up at both hrs | A_65_P05191 | 2.02 | 0.002 | 2.14 | 0.003 NM_144880.1 | MGC38798      | Mus musculus hypothetical protein MGC38798 (MGC38798), mRNA                |
| Up at both hrs | A_65_P05714 | 2.01 | 0.040 | 2.47 | 0.000             |               | UNKNOWN                                                                    |
| Up at both hrs | A_65_P10234 | 2.01 | 0.027 | 2.14 | 0.020 NM_009418.1 |               | UNKNOWN                                                                    |
| Up at both hrs | A_65_P09884 | 2.01 | 0.003 | 2.55 | 0.040 NM_007901.3 | Edg1          | Mus musculus endothelial differentiation sphingolipid G-protein-c          |
| Up at both hrs | A_65_P11379 | 2.00 | 0.043 | 2.15 | 0.019             | 1810037G04Rik | CGI                                                                        |
| Up at both hrs | A_65_P01566 | 2.00 | 0.031 | 2.02 | 0.030             | AU017834      | UNKNOWN                                                                    |
| Up at both hrs | A_65_P00764 | 2.00 | 0.048 | 2.28 | 0.033             |               | Intronic in U038590                                                        |
| Up at both hrs | A_65_P09651 | 1.99 | 0.016 | 2.47 | 0.033 XM_124026.1 | Cyp7b1        | Mus musculus cytochrome P450, 7b1 (Cyp7b1), mRNA                           |
| Up at both hrs | A_65_P03818 | 1.99 | 0.042 | 2.50 | 0.016             | C88045        | Intronic in U042932                                                        |
| Up at both hrs | A_65_P06447 | 1.99 | 0.035 | 2.42 | 0.004             |               | Intronic in U013452                                                        |
| Up at both hrs | A_65_P05194 | 1.99 | 0.029 | 1.92 | 0.040 NM_011347.1 | Selp          | Mus musculus selectin, platelet (Selp), mRNA                               |
| Up at both hrs | A_65_P04812 | 1.98 | 0.017 | 2.77 | 0.030             |               | Intronic in U010443                                                        |

|                |             |      |       |      |       |             |               |                                                                   |
|----------------|-------------|------|-------|------|-------|-------------|---------------|-------------------------------------------------------------------|
| Up at both hrs | A_65_P01695 | 1.98 | 0.041 | 2.37 | 0.039 | NM_025683.1 | 5730518J08Rik | Mus musculus RIKEN cDNA 5730518J08 gene (5730518J08Rik), mRNA     |
| Up at both hrs | A_65_P03336 | 1.97 | 0.044 | 3.47 | 0.015 |             |               | UNKNOWN                                                           |
| Up at both hrs | A_65_P00663 | 1.96 | 0.045 | 2.48 | 0.019 |             |               | UNKNOWN                                                           |
| Up at both hrs | A_65_P02360 | 1.96 | 0.028 | 2.00 | 0.025 |             | 2410004L22Rik | Mus musculus RIKEN cDNA 2410004L22 gene (2410004L22Rik), mRNA     |
| Up at both hrs | A_65_P02278 | 1.96 | 0.030 | 2.52 | 0.007 |             |               | Intronic in U042185                                               |
| Up at both hrs | A_65_P04346 | 1.96 | 0.022 | 1.97 | 0.016 | NM_015891.1 | PRP17         | PRE-MRNA SPLICING FACTOR PRP17. [Source:SWISSPROT;Acc:Q9DC48]     |
| Up at both hrs | A_65_P00546 | 1.95 | 0.028 | 1.91 | 0.039 |             | 5730496N17Rik | RIKEN cDNA 5730496N17 gene                                        |
| Up at both hrs | A_65_P00918 | 1.95 | 0.000 | 2.46 | 0.014 |             |               | UNKNOWN                                                           |
| Up at both hrs | A_65_P00690 | 1.95 | 0.017 | 1.82 | 0.036 |             | R75096        | Mus musculus solute carrier family 21 (organic anion transporter) |
| Up at both hrs | A_65_P10733 | 1.94 | 0.010 | 2.04 | 0.000 | NM_008367.1 | Il2ra         | Mus musculus interleukin 2 receptor, alpha chain (Il2ra), mRNA    |
| Up at both hrs | A_65_P00733 | 1.94 | 0.027 | 2.46 | 0.012 | U67841.1    | Dlx6          | HOMEBOX PROTEIN DLX-6 (FRAGMENT). [Source:SWISSPROT;Acc:P70397]   |
| Up at both hrs | A_65_P05102 | 1.94 | 0.008 | 2.43 | 0.007 | NM_011579.1 | Tgtp          | Mus musculus T-cell specific GTPase (Tgtp), mRNA                  |
| Up at both hrs | A_65_P04103 | 1.94 | 0.010 | 2.63 | 0.016 | XM_133549.1 | AW125844      | Mus musculus neurotrophic tyrosine kinase, receptor, type 3 (Ntrk |
| Up at both hrs | A_65_P01560 | 1.94 | 0.000 | 2.05 | 0.026 |             | A1426270      | NUCLEAR ZINC FINGER PROTEIN                                       |
| Up at both hrs | A_65_P06432 | 1.93 | 0.003 | 1.51 | 0.038 | NM_133237.1 | EIG180        | Mus musculus ethanol induced gene product EIG180 (EIG180), mRNA   |
| Up at both hrs | A_65_P06803 | 1.93 | 0.032 | 1.86 | 0.020 | XM_125546.2 | 4833419J07Rik | MACGAP homolog [Homo sapiens]                                     |
| Up at both hrs | A_65_P01229 | 1.93 | 0.045 | 2.21 | 0.025 |             |               | Intronic in U009549                                               |
| Up at both hrs | A_65_P02093 | 1.93 | 0.023 | 2.36 | 0.007 | AF124390.1  | Fxr1h         | Mus musculus fragile-X-related protein 1 (Fxr1h) gene, exon 10    |
| Up at both hrs | A_65_P00658 | 1.92 | 0.008 | 2.68 | 0.018 |             |               | UNKNOWN                                                           |
| Up at both hrs | A_65_P01271 | 1.92 | 0.011 | 1.60 | 0.022 | NM_008083.1 | Gap43         | Mus musculus brain abundant, membrane attached signal protein 2 ( |
| Up at both hrs | A_65_P02290 | 1.92 | 0.008 | 1.98 | 0.036 | NM_008528.2 | Blink         | Mus musculus B-cell linker (Blink), mRNA                          |
| Up at both hrs | A_65_P01235 | 1.92 | 0.041 | 1.83 | 0.029 |             | D19Ert200e    | Intronic in U038967                                               |
| Up at both hrs | A_65_P02697 | 1.92 | 0.016 | 1.87 | 0.045 |             |               | UNKNOWN                                                           |
| Up at both hrs | A_65_P05019 | 1.92 | 0.043 | 2.60 | 0.014 | NM_020591.1 | A030009H04Rik | Mus musculus RIKEN cDNA A030009H04 gene (A030009H04Rik), mRNA     |
| Up at both hrs | A_65_P08122 | 1.91 | 0.029 | 2.02 | 0.020 | NM_009058.1 | Rgds          | Mus musculus ral guanine nucleotide dissociation stimulator (Rgds |
| Up at both hrs | A_65_P04437 | 1.91 | 0.007 | 2.38 | 0.017 |             |               | UNKNOWN                                                           |
| Up at both hrs | A_65_P02752 | 1.91 | 0.019 | 1.87 | 0.010 |             |               | UNKNOWN                                                           |
| Up at both hrs | A_65_P04239 | 1.91 | 0.016 | 2.40 | 0.032 | AF149203.1  | Suv39h1       | suppressor of variegation 3-9 homolog 1 (Drosophila)              |
| Up at both hrs | A_65_P07004 | 1.91 | 0.023 | 2.23 | 0.008 |             |               | Intronic in U014940                                               |
| Up at both hrs | A_65_P09757 | 1.91 | 0.009 | 1.87 | 0.032 |             |               | UNKNOWN                                                           |
| Up at both hrs | A_65_P05241 | 1.90 | 0.048 | 2.68 | 0.010 | NM_023662.1 | Pcm1          | Mus musculus pericentriolar material 1 (Pcm1), mRNA               |
| Up at both hrs | A_65_P01721 | 1.90 | 0.033 | 2.07 | 0.023 | XM_097771.1 | 8430427H17Rik | F4 2 1 NOVEL PROTEIN SIMILAR TO NUCLEOLAR PROTEIN 4 NOL4 NOLP , I |
| Up at both hrs | A_65_P04374 | 1.89 | 0.033 | 3.29 | 0.005 | NM_153803.1 | MGC47419      | Mus musculus hypothetical protein MGC47419 (MGC47419), mRNA       |
| Up at both hrs | A_65_P02853 | 1.89 | 0.035 | 2.49 | 0.007 |             |               | UNKNOWN                                                           |
| Up at both hrs | A_65_P03351 | 1.89 | 0.000 | 2.03 | 0.005 | NM_146252.1 | BC025586      | Mus musculus cDNA sequence BC025586 (BC025586), mRNA              |
| Up at both hrs | A_65_P03879 | 1.89 | 0.019 | 2.65 | 0.049 |             | Psg29         | CEA17 PROTEIN (FRAGMENT). [Source:SPTREMBL;Acc:O08932]            |
| Up at both hrs | A_65_P01905 | 1.89 | 0.017 | 2.14 | 0.006 |             | C80283        | Intronic in U039235                                               |
| Up at both hrs | A_65_P02837 | 1.89 | 0.004 | 2.64 | 0.005 | XM_136007.2 | A430022B11    | Similar to: Mus musculus similar to X INACTIVE SPECIFIC TRANSCRIP |
| Up at both hrs | A_65_P05197 | 1.88 | 0.014 | 2.43 | 0.029 |             |               | Intronic in U036716                                               |
| Up at both hrs | A_65_P01991 | 1.87 | 0.040 | 2.40 | 0.029 | XM_130576.2 |               | similar to TRANSMEMBRANE GAMMA-CARBOXYGLUTAMIC ACID PROTEIN 4 PRE |
| Up at both hrs | A_65_P02113 | 1.87 | 0.041 | 2.03 | 0.009 | BC018425.1  | Wnt5a         | wingless-related MMTV integration site 5A                         |
| Up at both hrs | A_65_P01538 | 1.86 | 0.011 | 1.98 | 0.045 | NM_009396.1 | Tnfaip2       | Mus musculus tumor necrosis factor, alpha-induced protein 2 (Tnfa |
| Up at both hrs | A_65_P07272 | 1.86 | 0.005 | 2.09 | 0.044 |             |               | UNKNOWN                                                           |
| Up at both hrs | A_65_P04965 | 1.86 | 0.004 | 2.42 | 0.044 |             | AU014973      | Intronic in U032290                                               |
| Up at both hrs | A_65_P01616 | 1.86 | 0.021 | 2.75 | 0.015 |             |               | UNKNOWN                                                           |
| Up at both hrs | A_65_P02563 | 1.86 | 0.045 | 2.24 | 0.015 |             | AW549542      | UNKNOWN                                                           |
| Up at both hrs | A_65_P07440 | 1.85 | 0.005 | 2.37 | 0.024 |             |               | Intronic in U007486                                               |
| Up at both hrs | A_65_P02016 | 1.85 | 0.024 | 2.12 | 0.024 |             |               | Intronic in U029804                                               |
| Up at both hrs | A_65_P03394 | 1.85 | 0.004 | 2.41 | 0.045 |             |               | Intronic in U017499                                               |
| Up at both hrs | A_65_P01343 | 1.85 | 0.023 | 1.53 | 0.039 | NM_172670.1 | 5730485C17    | GLYCOSYLTRANSFERASE LIKE PROTEIN LARGE EC 2.4.-.- ACETYLGUCOSAMI  |
| Up at both hrs | A_65_P06539 | 1.85 | 0.015 | 1.68 | 0.007 | NM_030706.1 | Trim2         | Mus musculus tripartite motif protein 2 (Trim2), mRNA             |
| Up at both hrs | A_65_P10646 | 1.84 | 0.016 | 1.83 | 0.029 | NM_134063.1 | BC016423      | SIMILAR TO HYPOTHETICAL PROTEIN FLJ20360. [Source:SPTREMBL;Acc:Q9 |
| Up at both hrs | A_65_P02851 | 1.84 | 0.007 | 2.85 | 0.000 |             | 1700013B03Rik | UNKNOWN                                                           |
| Up at both hrs | A_65_P00819 | 1.84 | 0.001 | 2.96 | 0.039 | XM_135601.2 |               | Cross Reactive                                                    |
| Up at both hrs | A_65_P00674 | 1.84 | 0.019 | 1.61 | 0.001 | NM_007754.1 | Cpd           | Mus musculus carboxypeptidase D (Cpd), mRNA                       |
| Up at both hrs | A_65_P05097 | 1.84 | 0.007 | 2.25 | 0.001 |             |               | WD40 AND FYVE DOMAIN CONTAINING PROTEIN                           |
| Up at both hrs | A_65_P05863 | 1.83 | 0.012 | 1.89 | 0.026 | NM_023737.1 | 1300002P22Rik | Mus musculus RIKEN cDNA 1300002P22 gene (1300002P22Rik), mRNA     |
| Up at both hrs | A_65_P01849 | 1.83 | 0.013 | 1.79 | 0.029 |             | Usp8          | Mus musculus ubiquitin specific protease 8 (Usp8), mRNA           |

|                |             |      |       |      |       |             |               |                                                                   |
|----------------|-------------|------|-------|------|-------|-------------|---------------|-------------------------------------------------------------------|
| Up at both hrs | A_65_P02641 | 1.83 | 0.039 | 2.16 | 0.049 |             |               | Similar to: Mus musculus Sp100-rs1 mRNA, partial sequence         |
| Up at both hrs | A_65_P04241 | 1.83 | 0.000 | 1.70 | 0.017 | NM_126165.1 | Vps4a         | Mus musculus vacuolar protein sorting 4a (yeast) (Vps4a), mRNA    |
| Up at both hrs | A_65_P08148 | 1.82 | 0.018 | 2.54 | 0.020 | NM_009640.1 | Agpt          | Mus musculus angiotensinogen (Agpt), mRNA                         |
| Up at both hrs | A_65_P03983 | 1.82 | 0.017 | 2.26 | 0.016 | NM_009230.1 | Soat1         | Mus musculus sterol O-acyltransferase 1 (Soat1), mRNA             |
| Up at both hrs | A_65_P01828 | 1.82 | 0.028 | 2.43 | 0.020 |             |               | Intronic in U031909                                               |
| Up at both hrs | A_65_P02014 | 1.81 | 0.001 | 2.22 | 0.009 |             |               | UNKNOWN                                                           |
| Up at both hrs | A_65_P06984 | 1.81 | 0.008 | 1.84 | 0.043 | BC011313.1  | D7Wsu128e     | weakly similar to GENE PRODUCT WITH SIMILARITY TO UBIQUITIN BINDI |
| Up at both hrs | A_65_P04371 | 1.80 | 0.008 | 2.21 | 0.014 |             |               | UNKNOWN                                                           |
| Up at both hrs | A_65_P05779 | 1.80 | 0.031 | 2.03 | 0.049 | XM_123649.1 | Vps54         | Similar to: Mus musculus vacuolar protein sorting 54 (yeast) (Vps |
| Up at both hrs | A_65_P08249 | 1.80 | 0.012 | 2.42 | 0.030 |             |               | Intronic in U018666                                               |
| Up at both hrs | A_65_P00637 | 1.80 | 0.032 | 2.73 | 0.007 |             |               | UNKNOWN                                                           |
| Up at both hrs | A_65_P03133 | 1.80 | 0.027 | 2.28 | 0.000 | XM_135252.1 | LOC235682     | ZINC FINGER PROTEIN                                               |
| Up at both hrs | A_65_P06707 | 1.79 | 0.042 | 2.00 | 0.006 |             |               | UNKNOWN                                                           |
| Up at both hrs | A_65_P02631 | 1.79 | 0.046 | 2.40 | 0.046 |             | C76533        | UNKNOWN                                                           |
| Up at both hrs | A_65_P01540 | 1.79 | 0.022 | 1.89 | 0.043 | NM_011258.1 | Recc1         | UNKNOWN                                                           |
| Up at both hrs | A_65_P05582 | 1.79 | 0.020 | 2.09 | 0.026 |             | D15Ert492e    | Intronic in U036552                                               |
| Up at both hrs | A_65_P02483 | 1.79 | 0.021 | 2.36 | 0.008 |             |               | UNKNOWN                                                           |
| Up at both hrs | A_65_P08667 | 1.78 | 0.049 | 1.78 | 0.024 | NM_010946.1 | Ntan1         | Mus musculus N-terminal Asn amidase (Ntan1), mRNA                 |
| Up at both hrs | A_65_P10335 | 1.78 | 0.028 | 1.92 | 0.020 |             |               | UNKNOWN                                                           |
| Up at both hrs | A_65_P00551 | 1.77 | 0.001 | 2.23 | 0.050 |             | AU015777      | hypothetical Nucleotide-diphospho-sugar transferases structure co |
| Up at both hrs | A_65_P04905 | 1.77 | 0.021 | 2.11 | 0.018 |             | AA409368      | Intronic in U001321                                               |
| Up at both hrs | A_65_P03048 | 1.77 | 0.013 | 2.08 | 0.049 | NM_018813.1 | Cpsf3         | Mus musculus cleavage and polyadenylation specificity factor 3 (C |
| Up at both hrs | A_65_P02550 | 1.77 | 0.044 | 1.60 | 0.020 | NM_133967.1 | Zdhhc7        | Mus musculus zinc finger, DHHC domain containing 7 (Zdhhc7), mRNA |
| Up at both hrs | A_65_P03338 | 1.77 | 0.011 | 2.25 | 0.030 |             |               | UNKNOWN                                                           |
| Up at both hrs | A_65_P05378 | 1.77 | 0.036 | 1.89 | 0.008 | BC024057.1  | Cldn12        | CLAUDIN-12 (FRAGMENT). [Source:SPTREMBL;Acc:Q9ET43]               |
| Up at both hrs | A_65_P01692 | 1.76 | 0.046 | 1.43 | 0.033 | XM_127444.1 | Trip13        | THYROID RECEPTOR INTERACTING PROTEIN 13 TRIP 13                   |
| Up at both hrs | A_65_P02070 | 1.76 | 0.027 | 1.84 | 0.041 |             | P38ip         | Mus musculus transcription factor (p38 interacting protein) (P38i |
| Up at both hrs | A_65_P07048 | 1.76 | 0.012 | 2.24 | 0.013 | NM_009029.1 | Rb1           | Mus musculus retinoblastoma 1 (Rb1), mRNA                         |
| Up at both hrs | A_65_P00641 | 1.76 | 0.009 | 3.01 | 0.019 | BC003740.1  |               | UNKNOWN                                                           |
| Up at both hrs | A_65_P02951 | 1.76 | 0.043 | 2.90 | 0.002 | BC013543.1  | Aldrl6        | UNKNOWN                                                           |
| Up at both hrs | A_65_P02487 | 1.76 | 0.029 | 2.28 | 0.002 | AB037668.1  | Cgef2-pending | Mus musculus cAMP-regulated guanine nucleotide exchange factor II |
| Up at both hrs | A_65_P04809 | 1.75 | 0.025 | 2.32 | 0.050 |             |               | UNKNOWN                                                           |
| Up at both hrs | A_65_P04723 | 1.75 | 0.002 | 1.98 | 0.048 | NM_028756.1 | 1010001J06Rik | Mus musculus RIKEN cDNA 1010001J06 gene (1010001J06Rik), mRNA     |
| Up at both hrs | A_65_P06907 | 1.75 | 0.033 | 1.87 | 0.013 |             |               | Similar to: Mus musculus adult male corpora quadrigemina cDNA, RI |
| Up at both hrs | A_65_P07387 | 1.75 | 0.041 | 2.08 | 0.007 |             | Akap8         | Mus musculus A kinase (PRKA) anchor protein 8 (Akap8), mRNA       |
| Up at both hrs | A_65_P02399 | 1.75 | 0.000 | 2.49 | 0.010 | XM_030856.2 |               | UNKNOWN                                                           |
| Up at both hrs | A_65_P03964 | 1.74 | 0.000 | 2.09 | 0.047 | NM_172657.1 | B930045J24    | FUSED                                                             |
| Up at both hrs | A_65_P03840 | 1.74 | 0.014 | 2.29 | 0.006 | NM_008532.1 | Tacstd1       | Mus musculus tumor-associated calcium signal transducer 1 (Tacstd |
| Up at both hrs | A_65_P00945 | 1.74 | 0.026 | 2.09 | 0.002 |             | C81269        | Intronic in U018823                                               |
| Up at both hrs | A_65_P11532 | 1.74 | 0.020 | 2.22 | 0.040 | XM_176790.1 | Al451450      | LYSYL OXIDASE HOMOLOG 2 (EC 1.4.3.-) (LYSYL OXIDASE-LIKE PROTEIN  |
| Up at both hrs | A_65_P07318 | 1.73 | 0.033 | 2.12 | 0.028 |             | AU022680      | UNKNOWN                                                           |
| Up at both hrs | A_65_P02745 | 1.73 | 0.013 | 2.40 | 0.017 |             |               | Intronic in U038962                                               |
| Up at both hrs | A_65_P09821 | 1.73 | 0.018 | 1.82 | 0.015 |             | D2Ert282e     | Intronic in U002169                                               |
| Up at both hrs | A_65_P02448 | 1.73 | 0.005 | 1.84 | 0.017 |             | 5730427N09Rik | Mus musculus RIKEN cDNA 5730427N09 gene (5730427N09Rik), mRNA     |
| Up at both hrs | A_65_P02302 | 1.73 | 0.046 | 2.97 | 0.001 |             |               | Intronic in U011495                                               |
| Up at both hrs | A_65_P01738 | 1.73 | 0.011 | 2.26 | 0.013 |             |               | Intronic in U031548                                               |
| Up at both hrs | A_65_P05027 | 1.73 | 0.021 | 2.20 | 0.007 |             | Pbx1          | Mus musculus pre B-cell leukemia transcription factor 1 (Pbx1), m |
| Up at both hrs | A_65_P03696 | 1.73 | 0.017 | 1.81 | 0.048 |             | AW122079      | Mus musculus hypothetical protein DKFZp566A1524 (DKFZp566A1524),  |
| Up at both hrs | A_65_P02652 | 1.72 | 0.021 | 2.10 | 0.004 | XM_129857.2 | 3110018K12Rik | TGF BETA RECEPTOR ASSOCIATED PROTEIN                              |
| Up at both hrs | A_65_P20076 | 1.72 | 0.041 | 2.02 | 0.049 |             |               | UNKNOWN                                                           |
| Up at both hrs | A_65_P04391 | 1.72 | 0.020 | 1.72 | 0.050 |             |               | UNKNOWN                                                           |
| Up at both hrs | A_65_P01850 | 1.72 | 0.032 | 1.54 | 0.011 |             |               | UNKNOWN                                                           |
| Up at both hrs | A_65_P05486 | 1.72 | 0.041 | 1.87 | 0.021 | NM_009765.1 | Brca2         | Mus musculus breast cancer 2 (Brca2), mRNA                        |
| Up at both hrs | A_65_P02860 | 1.72 | 0.003 | 2.29 | 0.007 | NM_009881.1 | Cdyl          | Mus musculus chromodomain protein, Y chromosome-like (Cdyl), mRNA |
| Up at both hrs | A_65_P03629 | 1.71 | 0.017 | 2.29 | 0.039 | XM_179559.1 | 2610042L04Rik | UNKNOWN                                                           |
| Up at both hrs | A_65_P03828 | 1.71 | 0.045 | 2.32 | 0.003 |             |               | Intronic in U024684                                               |
| Up at both hrs | A_65_P05390 | 1.71 | 0.040 | 1.95 | 0.047 |             |               | TRANSMEMBRANE PROTEIN VEZATIN homolog [Homo sapiens]              |
| Up at both hrs | A_65_P01013 | 1.70 | 0.017 | 2.36 | 0.016 |             |               | Intronic in U036161                                               |



|                |             |      |       |      |                   |               |                                                                      |
|----------------|-------------|------|-------|------|-------------------|---------------|----------------------------------------------------------------------|
| Up at both hrs | A_65_P02791 | 1.70 | 0.004 | 2.12 | 0.008 BC005718.1  | Cldn6         | Mus musculus claudin 6 (Cldn6), mRNA                                 |
| Up at both hrs | A_65_P05203 | 1.70 | 0.032 | 1.97 | 0.037 AK013682.1  | 2900054C01Rik | Mus musculus adult male hippocampus cDNA, RIKEN full-length enric    |
| Up at both hrs | A_65_P05479 | 1.70 | 0.037 | 1.68 | 0.004             | D13Ert37e     | Intronic in U035117                                                  |
| Up at both hrs | A_65_P01833 | 1.70 | 0.044 | 2.56 | 0.024             |               | Intronic in U013825                                                  |
| Up at both hrs | A_65_P06535 | 1.70 | 0.027 | 1.43 | 0.036 XM_126613.1 |               | Mus musculus similar to hypothetical protein FLJ11749 [Homo sapie    |
| Up at both hrs | A_65_P03410 | 1.69 | 0.016 | 2.09 | 0.002 XM_123713.1 |               | Similar to: Mus musculus septin 2 (Sept2), mRNA                      |
| Up at both hrs | A_65_P01458 | 1.69 | 0.043 | 1.98 | 0.032 NM_030084.1 | 1810015L19Rik | UNKNOWN                                                              |
| Up at both hrs | A_65_P04247 | 1.69 | 0.048 | 1.90 | 0.033 NM_008412.1 | Ivl           | Mus musculus involucrin (Ivl), mRNA                                  |
| Up at both hrs | A_65_P10209 | 1.69 | 0.032 | 1.76 | 0.020 NM_026203.1 | 1700015F03Rik | Mus musculus RIKEN cDNA 1700015F03 gene (1700015F03Rik), mRNA        |
| Up at both hrs | A_65_P02270 | 1.69 | 0.024 | 1.76 | 0.048 NM_133654.1 | Cd34          | Mus musculus CD34 antigen (Cd34), mRNA                               |
| Up at both hrs | A_65_P02664 | 1.69 | 0.020 | 2.79 | 0.007             |               | UNKNOWN                                                              |
| Up at both hrs | A_65_P04007 | 1.69 | 0.041 | 2.28 | 0.004             |               | Intronic in U022132                                                  |
| Up at both hrs | A_65_P19128 | 1.69 | 0.008 | 1.57 | 0.044             |               | Intronic in U038967                                                  |
| Up at both hrs | A_65_P01432 | 1.68 | 0.029 | 1.63 | 0.042 NM_008721.1 | Npdc1         | Mus musculus neural proliferation, differentiation and control ge    |
| Up at both hrs | A_65_P03319 | 1.68 | 0.021 | 2.24 | 0.001             |               | Intronic in U041800                                                  |
| Up at both hrs | A_65_P03389 | 1.67 | 0.013 | 2.22 | 0.025             | AU015230      | UNKNOWN                                                              |
| Up at both hrs | A_65_P01323 | 1.67 | 0.002 | 2.11 | 0.038 NM_011346.1 | Sell          | Mus musculus selectin, lymphocyte (Sell), mRNA                       |
| Up at both hrs | A_65_P02253 | 1.67 | 0.012 | 1.80 | 0.030 AF109906.1  | C2            | Mus musculus neuraminidase 1 (Neu1), mRNA                            |
| Up at both hrs | A_65_P05876 | 1.66 | 0.046 | 2.42 | 0.007             | AU022840      | UNKNOWN                                                              |
| Up at both hrs | A_65_P06053 | 1.66 | 0.048 | 1.80 | 0.040 XM_126322.1 |               | Mus musculus similar to hypothetical protein [Homo sapiens] (LOC2    |
| Up at both hrs | A_65_P02435 | 1.66 | 0.037 | 2.17 | 0.025 XM_137923.2 | MGC28978      | UNKNOWN                                                              |
| Up at both hrs | A_65_P03396 | 1.65 | 0.008 | 1.93 | 0.022             |               | Intronic in U037995                                                  |
| Up at both hrs | A_65_P03402 | 1.65 | 0.024 | 2.11 | 0.025             |               | UNKNOWN                                                              |
| Up at both hrs | A_65_P03936 | 1.65 | 0.026 | 2.02 | 0.032             |               | Intronic in U036082                                                  |
| Up at both hrs | A_65_P05171 | 1.65 | 0.001 | 2.45 | 0.037 NM_152229.1 | Nr2e1         | Mus musculus nuclear receptor subfamily 2, group E, member 1 (Nr2    |
| Up at both hrs | A_65_P02392 | 1.65 | 0.016 | 2.63 | 0.041 NM_018748.2 | Golga4        | Mus musculus golgi autoantigen, golgin subfamily a, 4 (Golga4), m    |
| Up at both hrs | A_65_P01485 | 1.65 | 0.041 | 2.29 | 0.033             |               | UNKNOWN                                                              |
| Up at both hrs | A_65_P02936 | 1.64 | 0.040 | 2.06 | 0.020             | 2210010C17Rik | RIKEN cDNA 2210010C17 gene                                           |
| Up at both hrs | A_65_P09314 | 1.64 | 0.006 | 1.78 | 0.019             |               | Intronic in U016130                                                  |
| Up at both hrs | A_65_P04298 | 1.64 | 0.015 | 2.06 | 0.002             |               | Intronic in U019250                                                  |
| Up at both hrs | A_65_P03224 | 1.64 | 0.001 | 2.00 | 0.013             | Fem1a         | Mus musculus feminization 1 homolog a (C. elegans) (Fem1a), mRNA     |
| Up at both hrs | A_65_P06614 | 1.64 | 0.035 | 1.72 | 0.010             | Pde1c         | Mus musculus phosphodiesterase 1C (Pde1c), mRNA                      |
| Up at both hrs | A_65_P19417 | 1.63 | 0.023 | 1.95 | 0.048 XM_133591.2 |               | UNKNOWN                                                              |
| Up at both hrs | A_65_P02158 | 1.63 | 0.028 | 1.99 | 0.026             |               | Intronic in U031026                                                  |
| Up at both hrs | A_65_P10500 | 1.62 | 0.041 | 1.93 | 0.006 XM_129997.2 | Taf3          | UNKNOWN                                                              |
| Up at both hrs | A_65_P05680 | 1.62 | 0.021 | 1.80 | 0.006 XM_181399.1 | 2010305C02Rik | Mus musculus RIKEN cDNA 2010305C02 gene (2010305C02Rik), mRNA        |
| Up at both hrs | A_65_P07102 | 1.62 | 0.012 | 2.10 | 0.013             |               | Intronic in U030878                                                  |
| Up at both hrs | A_65_P01120 | 1.61 | 0.021 | 1.75 | 0.000 BC036374.1  | 4833438B11Rik | BROMODOMAIN AND PHD FINGER CONTAINING PROTEIN                        |
| Up at both hrs | A_65_P06725 | 1.61 | 0.014 | 1.56 | 0.047 NM_028814.1 | 2810403A07Rik | Mus musculus RIKEN cDNA 2810403A07 gene (2810403A07Rik), mRNA        |
| Up at both hrs | A_65_P00664 | 1.61 | 0.030 | 1.90 | 0.008 XM_128374.2 | LOC224416     | ZINC FINGER PROTEIN                                                  |
| Up at both hrs | A_65_P06709 | 1.61 | 0.024 | 1.98 | 0.020 NM_030238.1 | Dnchc1        | Mus musculus dynein, cytoplasmic, heavy chain 1 (Dnchc1), mRNA       |
| Up at both hrs | A_65_P03058 | 1.61 | 0.017 | 2.68 | 0.040             | AU024546      | UNKNOWN                                                              |
| Up at both hrs | A_65_P01206 | 1.61 | 0.015 | 1.80 | 0.003 NM_013604.1 | Mtx1          | Similar to: Mus musculus metaxin 1 (Mtx1), mRNA                      |
| Up at both hrs | A_65_P02471 | 1.61 | 0.027 | 1.96 | 0.038 XM_177541.1 |               | Mus musculus similar to polycystic kidney and hepatic disease 1 [    |
| Up at both hrs | A_65_P01834 | 1.60 | 0.007 | 2.48 | 0.002 BC031490.1  | Eplin-pending | Mus musculus epithelial protein lost in neoplasm (Eplin-pending),    |
| Up at both hrs | A_65_P01445 | 1.60 | 0.021 | 1.60 | 0.011 NM_028142.1 | 2810405F18Rik | Mus musculus RIKEN cDNA 2810405F18 gene (2810405F18Rik), mRNA        |
| Up at both hrs | A_65_P00851 | 1.60 | 0.023 | 1.71 | 0.048             | Cspg2         | Mus musculus chondroitin sulfate proteoglycan 2 (Cspg2), mRNA        |
| Up at both hrs | A_65_P02941 | 1.60 | 0.005 | 1.68 | 0.011             | Trip4         | Mus musculus thyroid hormone receptor interactor 4 (Trip4), mRNA     |
| Up at both hrs | A_65_P01890 | 1.60 | 0.047 | 1.55 | 0.048 XM_134198.2 | 3110005G23Rik | Mus musculus RIKEN cDNA 3110005G23 gene (3110005G23Rik), mRNA        |
| Up at both hrs | A_65_P01732 | 1.59 | 0.014 | 1.92 | 0.004             |               | Similar to: Mus musculus, clone IMAGE:5343601, mRNA                  |
| Up at both hrs | A_65_P02919 | 1.58 | 0.021 | 2.15 | 0.037             |               | BA62C3                                                               |
| Up at both hrs | A_65_P03449 | 1.58 | 0.023 | 2.18 | 0.002 BC006710.1  | Siat6         | Mus musculus sialyltransferase 6 (N-acetylglucosaminidase alpha 2,3- |
| Up at both hrs | A_65_P11552 | 1.58 | 0.033 | 1.82 | 0.001 XM_129997.2 | Taf3          | TAFII140 PROTEIN (FRAGMENT) homolog [Mus musculus]                   |
| Up at both hrs | A_65_P02939 | 1.58 | 0.034 | 1.55 | 0.012 NM_153389.1 | MGC37731      | Mus musculus hypothetical protein MGC37731 (MGC37731), mRNA          |
| Up at both hrs | A_65_P05292 | 1.58 | 0.027 | 1.41 | 0.012 XM_124330.1 | lpp           | Mus musculus IAP promoted placental gene (lpp), mRNA                 |
| Up at both hrs | A_65_P00654 | 1.58 | 0.016 | 2.10 | 0.047             |               | UNKNOWN                                                              |
| Up at both hrs | A_65_P05533 | 1.57 | 0.008 | 2.14 | 0.012             |               | MYOTUBULARIN RELATED PROTEIN 5 SET BINDING FACTOR 1 SBF1             |
| Up at both hrs | A_65_P02277 | 1.57 | 0.034 | 2.00 | 0.000             |               | REPEAT-SEQUENCE                                                      |

|                |             |      |       |      |                   |                 |                                                                   |
|----------------|-------------|------|-------|------|-------------------|-----------------|-------------------------------------------------------------------|
| Up at both hrs | A_65_P04667 | 1.57 | 0.010 | 2.19 | 0.012             |                 | Intronic in U038962                                               |
| Up at both hrs | A_65_P03521 | 1.57 | 0.002 | 1.88 | 0.024             |                 | UNKNOWN                                                           |
| Up at both hrs | A_65_P03215 | 1.57 | 0.005 | 1.64 | 0.037             | 5730470L24Rik   | Mus musculus RIKEN cDNA 5730470L24 gene (5730470L24Rik), mRNA     |
| Up at both hrs | A_65_P04577 | 1.56 | 0.039 | 2.26 | 0.015             |                 | UNKNOWN                                                           |
| Up at both hrs | A_65_P02636 | 1.55 | 0.018 | 2.08 | 0.021             | D11Bwg0517e     | BINDING                                                           |
| Up at both hrs | A_65_P03204 | 1.55 | 0.015 | 1.96 | 0.001 NM_025382.1 | 1110007C24Rik   | Mus musculus RIKEN cDNA 9230118A01 gene (9230118A01Rik), mRNA     |
| Up at both hrs | A_65_P02054 | 1.55 | 0.008 | 2.02 | 0.039             |                 | UNKNOWN                                                           |
| Up at both hrs | A_65_P04725 | 1.55 | 0.006 | 1.64 | 0.035 NM_019804.1 | B4galt4         | Mus musculus UDP-Gal:betaGlcNAc beta 1,4-galactosyltransferase, p |
| Up at both hrs | A_65_P09715 | 1.55 | 0.002 | 1.28 | 0.035             | 9430096L06Rik   | UNKNOWN                                                           |
| Up at both hrs | A_65_P00739 | 1.55 | 0.009 | 1.81 | 0.011 BC024089.1  |                 | Similar to: Mus musculus hypothetical protein MGC30464 (LOC229512 |
| Up at both hrs | A_65_P04380 | 1.54 | 0.030 | 2.73 | 0.001             |                 | hypothetical HECT domain (Ubiquitin-protein ligase) containing pr |
| Up at both hrs | A_65_P02942 | 1.54 | 0.026 | 1.44 | 0.019 XM_133621.2 | 2610030B18Rik   | KIAA0280 PROTEIN (FRAGMENT) homolog [Homo sapiens]                |
| Up at both hrs | A_65_P01627 | 1.54 | 0.023 | 1.68 | 0.031 NM_011171.1 | Procr           | Mus musculus protein C receptor, endothelial (Procr), mRNA        |
| Up at both hrs | A_65_P11525 | 1.54 | 0.035 | 2.05 | 0.040             |                 | Intronic in U009937                                               |
| Up at both hrs | A_65_P04158 | 1.53 | 0.044 | 1.38 | 0.045 XM_129295.2 | AW049900        | GOLGI SPECIFIC BREFELDIN A RESISTANCE GUANINE NUCLEOTIDE EXCHANGE |
| Up at both hrs | A_65_P02668 | 1.53 | 0.026 | 2.05 | 0.002             |                 | Intronic in U019461                                               |
| Up at both hrs | A_65_P00742 | 1.53 | 0.019 | 1.46 | 0.031 BC021344.1  | Rpl22           | Mus musculus ribosomal protein L22 (Rpl22), mRNA                  |
| Up at both hrs | A_65_P03516 | 1.52 | 0.003 | 2.07 | 0.021 NM_009975.1 | Csnk2b          | Mus musculus casein kinase II, beta subunit (Csnk2b), mRNA        |
| Up at both hrs | A_65_P01463 | 1.52 | 0.023 | 1.56 | 0.047 NM_145929.1 | Gga1            | Mus musculus golgi associated, gamma adaptin ear containing, ARF  |
| Up at both hrs | A_65_P01791 | 1.52 | 0.035 | 1.51 | 0.029 NM_031380.1 | Fstl3           | Mus musculus follistatin-like 3 (Fstl3), mRNA                     |
| Up at both hrs | A_65_P05324 | 1.52 | 0.031 | 1.95 | 0.048             |                 | UNKNOWN                                                           |
| Up at both hrs | A_65_P01439 | 1.52 | 0.038 | 1.86 | 0.033 NM_008949.1 | Psmc3ip         | TBPIP. [Source:SPTREMBL;Acc:O35047]                               |
| Up at both hrs | A_65_P05875 | 1.52 | 0.040 | 1.68 | 0.037             |                 | Similar to: Mus musculus, clone IMAGE:4013971, mRNA               |
| Up at both hrs | A_65_P00798 | 1.52 | 0.002 | 1.83 | 0.029 XM_127102.1 | LOC217837       | SIMILAR TO INOSITOL 1,3,4 TRIPHOSPHATE 5/6                        |
| Up at both hrs | A_65_P05743 | 1.52 | 0.035 | 1.80 | 0.014             |                 | Intronic in U034974                                               |
| Up at both hrs | A_65_P02826 | 1.51 | 0.014 | 1.62 | 0.031             |                 | Intronic in U009526                                               |
| Up at both hrs | A_65_P02310 | 1.51 | 0.047 | 1.96 | 0.040 AK011347.1  | 2610008G14Rik   | Mus musculus 10 days embryo whole body cDNA, RIKEN full-length en |
| Up at both hrs | A_65_P13525 | 1.50 | 0.047 | 2.01 | 0.020             | C81203          | Intronic in U021095                                               |
| Up at both hrs | A_65_P02259 | 1.50 | 0.048 | 1.80 | 0.006 AY043479.1  | B3gnt1          | UNKNOWN                                                           |
| Up at both hrs | A_65_P05216 | 1.50 | 0.024 | 2.09 | 0.045             | A1449595        | Intronic in U027747                                               |
| Up at both hrs | A_65_P01717 | 1.50 | 0.007 | 1.62 | 0.027 BC036772.1  | 3110031O14Rik   | weakly similar to SIMILAR TO KIAA0443 GENE PRODUCT [Homo sapiens] |
| Up at both hrs | A_65_P04091 | 1.50 | 0.040 | 2.07 | 0.024             | G2an            | UNKNOWN                                                           |
| Up at both hrs | A_65_P01899 | 1.50 | 0.029 | 1.93 | 0.001 NM_025656.1 | Sip1            | Mus musculus survivor of motor neuron protein interacting protein |
| Up at both hrs | A_65_P05736 | 1.50 | 0.042 | 1.68 | 0.034             |                 | UNKNOWN                                                           |
| Up at both hrs | A_65_P10888 | 1.50 | 0.032 | 1.73 | 0.018             |                 | UNKNOWN                                                           |
| Up at both hrs | A_65_P01349 | 1.50 | 0.029 | 1.43 | 0.020 NM_148927.1 | 2410005C22Rik   | Mus musculus RIKEN cDNA 2410005C22 gene (2410005C22Rik), mRNA     |
| Up at both hrs | A_65_P02197 | 1.49 | 0.007 | 1.99 | 0.014             |                 | UNKNOWN                                                           |
| Up at both hrs | A_65_P06811 | 1.49 | 0.003 | 1.55 | 0.012 XM_128629.2 | 1190004I24Rik   | VALYL TRNA SYNTHETASE EC 6.1.1.9 VALINE TRNA LIGASE               |
| Up at both hrs | A_65_P02477 | 1.49 | 0.023 | 1.96 | 0.044 NM_020611.2 | Srd5a2l         | Mus musculus steroid 5 alpha-reductase 2-like (Srd5a2l), mRNA     |
| Up at both hrs | A_65_P02467 | 1.49 | 0.019 | 1.58 | 0.027             |                 | Intronic in U005697                                               |
| Up at both hrs | A_65_P12385 | 1.48 | 0.026 | 1.84 | 0.047             |                 | Intronic in U043436                                               |
| Up at both hrs | A_65_P03249 | 1.48 | 0.040 | 1.70 | 0.030 NM_029550.1 | Keg1            | Mus musculus kidney expressed gene 1 (Keg1), mRNA                 |
| Up at both hrs | A_65_P03119 | 1.48 | 0.022 | 1.41 | 0.038 BC037451.1  | Nyren18-pending | Mus musculus NY-REN-18 antigen (Nyren18-pending), mRNA            |
| Up at both hrs | A_65_P04815 | 1.48 | 0.007 | 1.70 | 0.013 XM_131261.1 | 6030436C20Rik   | PROTEIN KINASE C, TYPE EC 2.7.1.-                                 |
| Up at both hrs | A_65_P04754 | 1.48 | 0.036 | 2.69 | 0.043             |                 | Intronic in U014142                                               |
| Up at both hrs | A_65_P08841 | 1.48 | 0.041 | 1.28 | 0.016 BC026467.1  |                 | Mus musculus, clone IMAGE:4485556, mRNA                           |
| Up at both hrs | A_65_P18637 | 1.48 | 0.041 | 1.92 | 0.030             | C79798          | UNKNOWN                                                           |
| Up at both hrs | A_65_P08185 | 1.48 | 0.021 | 1.70 | 0.043             |                 | UNKNOWN                                                           |
| Up at both hrs | A_65_P02978 | 1.47 | 0.023 | 2.19 | 0.032 NM_134074.1 | AA959601        | TRG PROTEIN (FRAGMENT) homolog [Rattus norvegicus]                |
| Up at both hrs | A_65_P03740 | 1.47 | 0.018 | 1.45 | 0.020 NM_172291.1 | LOC235169       | hypothetical FAD/NAD(P)-binding domain structure containing prote |
| Up at both hrs | A_65_P02468 | 1.47 | 0.012 | 1.27 | 0.015             | 4932417H02Rik   | P150 TARGET OF RAPAMYCIN TOR SCAFFOLD PROTEIN CONTAINING WD       |
| Up at both hrs | A_65_P03543 | 1.46 | 0.036 | 2.50 | 0.004             | D14Ert725e      | Intronic in U015372                                               |
| Up at both hrs | A_65_P03052 | 1.46 | 0.046 | 2.25 | 0.016             |                 | UNKNOWN                                                           |
| Up at both hrs | A_65_P02455 | 1.46 | 0.032 | 1.87 | 0.024             | C76453          | UNKNOWN                                                           |
| Up at both hrs | A_65_P05608 | 1.45 | 0.049 | 1.61 | 0.024 XM_132332.2 | 2210016L21Rik   | Mus musculus RIKEN cDNA 2210016L21 gene (2210016L21Rik), mRNA     |
| Up at both hrs | A_65_P10779 | 1.45 | 0.002 | 1.36 | 0.040 BC030069.1  | Bok             | Mus musculus Bcl-2-related ovarian killer protein (Bok), mRNA     |
| Up at both hrs | A_65_P01434 | 1.45 | 0.031 | 1.33 | 0.036 XM_129421.2 | LOC226412       | CAMP REGULATED PHOSPHOPROTEIN 21 ARPP                             |
| Up at both hrs | A_65_P04016 | 1.44 | 0.004 | 1.76 | 0.024 NM_013717.1 | Eppb9           | endothelial precursor protein B9                                  |

|                |             |      |       |      |                   |                      |                                                                   |
|----------------|-------------|------|-------|------|-------------------|----------------------|-------------------------------------------------------------------|
| Up at both hrs | A_65_P04336 | 1.44 | 0.045 | 1.70 | 0.009 NM_012005.1 | Crsp2                | Mus musculus cofactor required for Sp1 transcriptional activation |
| Up at both hrs | A_65_P02381 | 1.44 | 0.001 | 2.32 | 0.002 NM_172409.1 | 5430425K04Rik        | Intronic in U022633                                               |
| Up at both hrs | A_65_P05692 | 1.44 | 0.000 | 1.62 | 0.022 NM_031185.1 | Akap12               | Mus musculus A kinase (PRKA) anchor protein (gravin) 12 (Akap12), |
| Up at both hrs | A_65_P05613 | 1.44 | 0.034 | 1.84 | 0.048             |                      | Intronic in U001379                                               |
| Up at both hrs | A_65_P01075 | 1.43 | 0.022 | 1.38 | 0.048 BC029706.1  |                      | Mus musculus, clone IMAGE:5011290, mRNA                           |
| Up at both hrs | A_65_P03647 | 1.43 | 0.037 | 1.84 | 0.003 NM_010086.1 | Adam24               | Mus musculus a disintegrin and metalloprotease domain 25 (testase |
| Up at both hrs | A_65_P05686 | 1.43 | 0.000 | 1.49 | 0.034 BC019432.1  | Rxrb                 | Mus musculus retinoid X receptor beta (Rxrb), mRNA                |
| Up at both hrs | A_65_P04584 | 1.42 | 0.013 | 1.40 | 0.046 BC021481.1  | Myo1c                | Mus musculus myosin IC (Myo1c), mRNA                              |
| Up at both hrs | A_65_P04089 | 1.42 | 0.042 | 1.95 | 0.021             | AU015084             | Intronic in U004120                                               |
| Up at both hrs | A_65_P01053 | 1.42 | 0.026 | 1.43 | 0.049 NM_144521.1 | 1110031B06Rik        | Mus musculus RIKEN cDNA 1110031B06 gene (1110031B06Rik), mRNA     |
| Up at both hrs | A_65_P05683 | 1.41 | 0.016 | 1.13 | 0.037 NM_029418.1 | 9130401M01Rik        | Mus musculus RIKEN cDNA 9130401M01 gene (9130401M01Rik), mRNA     |
| Up at both hrs | A_65_P04515 | 1.41 | 0.024 | 1.50 | 0.004 NM_019729.1 | Usp8                 | Mus musculus ubiquitin specific protease 8 (Usp8), mRNA           |
| Up at both hrs | A_65_P01242 | 1.41 | 0.014 | 1.50 | 0.003             |                      | UNKNOWN                                                           |
| Up at both hrs | A_65_P03237 | 1.40 | 0.025 | 2.06 | 0.004 XM_127369.1 | 2310051M13Rik;Ctla2a | Mus musculus cytotoxic T lymphocyte-associated protein 2 alpha (C |
| Up at both hrs | A_65_P07092 | 1.40 | 0.022 | 1.61 | 0.011             | Noc4                 | Mus musculus neighbor of Cox4 (Noc4), mRNA                        |
| Up at both hrs | A_65_P04096 | 1.40 | 0.044 | 2.66 | 0.028             |                      | REPEAT-SEQUENCE                                                   |
| Up at both hrs | A_65_P02772 | 1.40 | 0.027 | 1.50 | 0.000 XM_131544.1 | 2010305A19Rik        | RIKEN cDNA 2010305A19 gene                                        |
| Up at both hrs | A_65_P05152 | 1.40 | 0.014 | 2.13 | 0.020             |                      | UNKNOWN                                                           |
| Up at both hrs | A_65_P01358 | 1.40 | 0.015 | 1.78 | 0.027             |                      | Intronic in U019530                                               |
| Up at both hrs | A_65_P03110 | 1.40 | 0.010 | 1.59 | 0.012             | AW215868             | UNKNOWN                                                           |
| Up at both hrs | A_65_P04114 | 1.40 | 0.032 | 1.51 | 0.021 XM_125609.1 |                      | MONOCARBOXYLATE TRANSPORTER 8 MCT 8 X LINKED PEST CONTAINING      |
| Up at both hrs | A_65_P01523 | 1.39 | 0.042 | 1.42 | 0.005 BC016209.1  | 1110005A03Rik        | ET PUTATIVE TRANSLATION PRODUCT (FRAGMENT). [Source:SPTREMBL;Acc: |
| Up at both hrs | A_65_P03875 | 1.39 | 0.039 | 1.48 | 0.038 BC031796.1  | 2610510L01Rik        | Mus musculus RIKEN cDNA 2610510L01 gene (2610510L01Rik), mRNA     |
| Up at both hrs | A_65_P06684 | 1.39 | 0.012 | 1.46 | 0.026 XM_143775.2 |                      | UNKNOWN                                                           |
| Up at both hrs | A_65_P01825 | 1.39 | 0.040 | 1.72 | 0.042             |                      | UNKNOWN                                                           |
| Up at both hrs | A_65_P02838 | 1.39 | 0.023 | 1.46 | 0.015 XM_129271.1 | 1200003G01Rik        | hypothetical NHL repeat containing protein                        |
| Up at both hrs | A_65_P02686 | 1.39 | 0.020 | 1.82 | 0.010 XM_132975.1 | A230083D09           | REPEAT-SEQUENCE                                                   |
| Up at both hrs | A_65_P05160 | 1.39 | 0.042 | 1.77 | 0.013 XM_133987.1 | Ing1                 | Mus musculus inhibitor of growth family, member 1 (Ing1), mRNA    |
| Up at both hrs | A_65_P05795 | 1.39 | 0.006 | 1.40 | 0.007 NM_016737.1 | Stip1                | Mus musculus stress-induced phosphoprotein 1 (Stip1), mRNA        |
| Up at both hrs | A_65_P03458 | 1.39 | 0.045 | 1.53 | 0.004 NM_015765.1 | Hsp70-4              | Mus musculus heat shock protein, 70 kDa 4 (Hsp70-4), mRNA         |
| Up at both hrs | A_65_P06473 | 1.39 | 0.001 | 1.43 | 0.005 BC031506.1  | Dgcr2                | Mus musculus DiGeorge syndrome critical region gene 2 (Dgcr2), mR |
| Up at both hrs | A_65_P07324 | 1.38 | 0.008 | 1.29 | 0.038 NM_031373.1 | Ogfr                 | Mus musculus opioid growth factor receptor (Ogfr), mRNA           |
| Up at both hrs | A_65_P09179 | 1.38 | 0.046 | 1.52 | 0.019             | Lims1l               | PINCH PROTEIN PARTICULARLY INTERESTING NEW CYS HIS                |
| Up at both hrs | A_65_P04289 | 1.38 | 0.021 | 1.94 | 0.026             |                      | Intronic in U018413                                               |
| Up at both hrs | A_65_P00860 | 1.38 | 0.002 | 1.24 | 0.012             | Sdc3                 | Similar to: Rattus norvegicus syndecan 3 (Sdc3), mRNA             |
| Up at both hrs | A_65_P03739 | 1.37 | 0.009 | 1.90 | 0.019             | Eef1a1               | UNKNOWN                                                           |
| Up at both hrs | A_65_P09797 | 1.37 | 0.002 | 1.73 | 0.033 XM_134174.2 | AI481402             | AT2 RECEPTOR INTERACTING PROTEIN 1                                |
| Up at both hrs | A_65_P04278 | 1.37 | 0.011 | 1.65 | 0.013 XM_133070.1 | Trim24               | tripartite motif protein 24                                       |
| Up at both hrs | A_65_P03829 | 1.37 | 0.010 | 1.59 | 0.030 NM_053207.1 | Egln1                | Mus musculus EGL nine homolog 1 (C. elegans) (Egln1), mRNA        |
| Up at both hrs | A_65_P06945 | 1.37 | 0.043 | 1.54 | 0.024 BC031421.1  | Igfbp3               | Mus musculus insulin-like growth factor binding protein 3 (Igfbp3 |
| Up at both hrs | A_65_P10236 | 1.37 | 0.024 | 1.49 | 0.006 NM_013543.1 | H2-Ke6               | Mus musculus H2-K region expressed gene 6 (H2-Ke6), mRNA          |
| Up at both hrs | A_65_P02097 | 1.37 | 0.017 | 1.47 | 0.033             |                      | Intronic in U013121                                               |
| Up at both hrs | A_65_P01942 | 1.36 | 0.012 | 1.70 | 0.003             | 1500031A17Rik        | UNKNOWN                                                           |
| Up at both hrs | A_65_P03634 | 1.36 | 0.004 | 1.76 | 0.008 XM_131651.1 | 1500001L03Rik        | Mus musculus RIKEN cDNA 1500001L03 gene (1500001L03Rik), mRNA     |
| Up at both hrs | A_65_P00573 | 1.35 | 0.004 | 1.49 | 0.031 XM_136365.1 | AU019877             | hypothetical Galponin-homology domain, CH-domain/HMG-box structur |
| Up at both hrs | A_65_P11769 | 1.35 | 0.008 | 1.25 | 0.015 XM_134818.1 | AL024221             | Mus musculus expressed sequence AL024221 (AL024221), mRNA         |
| Up at both hrs | A_65_P01193 | 1.35 | 0.048 | 1.70 | 0.034 AF099186.1  | Ehd1                 | Mus musculus EH-domain containing 1 (Ehd1), mRNA                  |
| Up at both hrs | A_65_P02570 | 1.35 | 0.006 | 1.65 | 0.021             |                      | Intronic in U026305                                               |
| Up at both hrs | A_65_P10503 | 1.35 | 0.011 | 1.09 | 0.040 NM_011479.1 | Sptlc2               | Mus musculus serine palmitoyltransferase, long chain base subunit |
| Up at both hrs | A_65_P03599 | 1.35 | 0.020 | 1.55 | 0.038 NM_013745.1 | Nufip1               | Mus musculus nuclear fragile X mental retardation protein interac |
| Up at both hrs | A_65_P01150 | 1.34 | 0.029 | 1.31 | 0.012 NM_021886.1 | Cenph                | Mus musculus centromere autoantigen H (Cenph), mRNA               |
| Up at both hrs | A_65_P01939 | 1.34 | 0.014 | 1.29 | 0.025 NM_010765.1 | Mapkapk5             | Mus musculus MAP kinase-activated protein kinase 5 (Mapkapk5), mR |
| Up at both hrs | A_65_P04852 | 1.33 | 0.020 | 2.05 | 0.017 AK018455.1  | 8430434E15Rik        | KINESIN                                                           |
| Up at both hrs | A_65_P20825 | 1.33 | 0.040 | 1.99 | 0.011             |                      | UNKNOWN                                                           |
| Up at both hrs | A_65_P03054 | 1.33 | 0.025 | 1.79 | 0.000 NM_009057.1 | Rga                  | Mus musculus recombination activating gene 1 gene activation (Rga |
| Up at both hrs | A_65_P04293 | 1.33 | 0.017 | 1.68 | 0.030 NM_010917.1 | Nid1                 | Mus musculus nidogen 1 (Nid1), mRNA                               |
| Up at both hrs | A_65_P06788 | 1.33 | 0.013 | 1.27 | 0.001             |                      | UNKNOWN                                                           |
| Up at both hrs | A_65_P06156 | 1.33 | 0.010 | 1.25 | 0.016 XM_126935.1 | 2310009M18Rik        | 7ACOMP PROTEIN homolog [Rattus sp]                                |

|                |             |      |       |      |                   |               |                                                                    |
|----------------|-------------|------|-------|------|-------------------|---------------|--------------------------------------------------------------------|
| Up at both hrs | A_65_P02338 | 1.33 | 0.031 | 1.38 | 0.049 XM_129449.1 | 2310009B15Rik | Mus musculus RIKEN cDNA 2310009B15 gene (2310009B15Rik), mRNA      |
| Up at both hrs | A_65_P03642 | 1.32 | 0.003 | 1.48 | 0.014             | D4Erd103e     | UNKNOWN                                                            |
| Up at both hrs | A_65_P02038 | 1.32 | 0.038 | 1.53 | 0.047 XM_135073.2 | 2610101N10Rik | UNKNOWN                                                            |
| Up at both hrs | A_65_P00566 | 1.32 | 0.009 | 1.51 | 0.020             |               | UNKNOWN                                                            |
| Up at both hrs | A_65_P04001 | 1.32 | 0.000 | 1.50 | 0.034 NM_013909.1 | Fbxl6         | REPEAT-SEQUENCE                                                    |
| Up at both hrs | A_65_P02913 | 1.32 | 0.005 | 1.64 | 0.005 NM_009418.1 | Tpp2          | Mus musculus tripeptidyl peptidase II (Tpp2), mRNA                 |
| Up at both hrs | A_65_P01998 | 1.32 | 0.031 | 1.19 | 0.007 XM_133304.1 | 2810002B19Rik | DNA DIRECTED RNA POLYMERASE II 14.5 KDA POLYPEPTIDE EC 2.7.7.6 RP  |
| Up at both hrs | A_65_P01639 | 1.31 | 0.011 | 1.51 | 0.037 XM_125726.2 |               | SERINE/THREONINE PROTEIN KINASE                                    |
| Up at both hrs | A_65_P03134 | 1.31 | 0.002 | 1.50 | 0.003             | 6030458C11Rik | UNKNOWN                                                            |
| Up at both hrs | A_65_P05688 | 1.31 | 0.004 | 1.19 | 0.049 NM_016878.1 | Dnpep         | Mus musculus aspartyl aminopeptidase (Dnpep), mRNA                 |
| Up at both hrs | A_65_P07564 | 1.31 | 0.030 | 1.18 | 0.001 NM_053076.1 | Rtn3          | Mus musculus reticulon 3 (Rtn3), mRNA                              |
| Up at both hrs | A_65_P00565 | 1.31 | 0.027 | 1.56 | 0.033 NM_026522.1 | 3110023E09Rik | Mus musculus RIKEN cDNA 3110023E09 gene (3110023E09Rik), mRNA      |
| Up at both hrs | A_65_P01466 | 1.31 | 0.014 | 1.34 | 0.001             |               | REPEAT-SEQUENCE                                                    |
| Up at both hrs | A_65_P02671 | 1.31 | 0.018 | 1.18 | 0.046 NM_026729.1 | Ict1          | Mus musculus immature colon carcinoma transcript 1 (Ict1), mRNA    |
| Up at both hrs | A_65_P03114 | 1.30 | 0.005 | 1.82 | 0.012             | C030021G16Rik | UNKNOWN                                                            |
| Up at both hrs | A_65_P02848 | 1.30 | 0.029 | 1.50 | 0.009             | Trf           | Mus musculus transferrin (Trf), mRNA                               |
| Up at both hrs | A_65_P06718 | 1.30 | 0.042 | 1.17 | 0.042 NM_016981.1 | Slc9a1        | Mus musculus solute carrier family 9 (sodium/hydrogen exchanger),  |
| Up at both hrs | A_65_P02525 | 1.30 | 0.025 | 1.31 | 0.038 NM_010817.1 | Psmc7         | Mus musculus proteasome (prosome, macropain) 26S subunit, non-ATP  |
| Up at both hrs | A_65_P04440 | 1.30 | 0.008 | 1.35 | 0.050 XM_125825.1 | D10Erdt773e   | HIV 1 REV BINDING PROTEIN                                          |
| Up at both hrs | A_65_P04575 | 1.30 | 0.049 | 1.60 | 0.004 NM_026566.1 | 9430023L20Rik | Mus musculus RIKEN cDNA 9430023L20 gene (9430023L20Rik), mRNA      |
| Up at both hrs | A_65_P01118 | 1.29 | 0.004 | 1.26 | 0.001 NM_008889.1 | Ppp1r14b      | Mus musculus protein phosphatase 1, regulatory (inhibitor) subunit |
| Up at both hrs | A_65_P06903 | 1.29 | 0.018 | 1.12 | 0.040 XM_132343.2 | 1500011J06Rik | weakly similar to SPLICING FACTOR, ARGININE/SERINE-RICH 6 (PRE-MR  |
| Up at both hrs | A_65_P03320 | 1.29 | 0.033 | 1.61 | 0.012 BC030449.1  | 1600013P15Rik | hypothetical Generic methyl-transferase/SAM (and some other nucle  |
| Up at both hrs | A_65_P01984 | 1.28 | 0.010 | 1.32 | 0.046 XM_126452.1 | 5730466P16    | PROTEIN PM1                                                        |
| Up at both hrs | A_65_P02205 | 1.28 | 0.034 | 1.46 | 0.044             |               | UNKNOWN                                                            |
| Up at both hrs | A_65_P08924 | 1.28 | 0.031 | 1.32 | 0.005 NM_133947.1 | AL022610      | NUCLEAR MITOTIC APPARATUS PROTEIN                                  |
| Up at both hrs | A_65_P01326 | 1.28 | 0.023 | 1.57 | 0.036             |               | UNKNOWN                                                            |
| Up at both hrs | A_65_P01135 | 1.27 | 0.024 | 1.34 | 0.007 XM_132346.2 | 2400003N08Rik | weakly similar to FLJ00052 PROTEIN (FRAGMENT) [Homo sapiens]       |
| Up at both hrs | A_65_P17508 | 1.27 | 0.016 | 1.25 | 0.016 XM_130592.2 | D2Bwg0891e    | (1110017A21RIK PROTEIN) (DNA SEGMENT, CHR 2, BRIGHAM & WOMENS GEN  |
| Up at both hrs | A_65_P05754 | 1.27 | 0.031 | 1.21 | 0.032 NM_011826.1 | Hs1bp1        | Similar to: Mus musculus HS-1-associating protein HAX-1L (mHAX-1s  |
| Up at both hrs | A_65_P05391 | 1.26 | 0.044 | 1.18 | 0.035 NM_007591.1 | Calr          | Mus musculus calreticulin (Calr), mRNA                             |
| Up at both hrs | A_65_P00943 | 1.26 | 0.014 | 1.53 | 0.000 AJ249895.1  | mas           | Intronic in U017499                                                |
| Up at both hrs | A_65_P04948 | 1.26 | 0.022 | 1.26 | 0.011 NM_007481.1 | Arf6          | Mus musculus ADP-ribosylation factor 6 (Arf6), mRNA                |
| Up at both hrs | A_65_P06836 | 1.26 | 0.048 | 1.32 | 0.020 AF177026.1  | AV071822      | Mus musculus transducer of ERBB2, 2 (Tob2), mRNA                   |
| Up at both hrs | A_65_P10586 | 1.25 | 0.017 | 1.36 | 0.039 NM_026514.1 | Cdc42ep3      | Mus musculus CDC42 effector protein (Rho GTPase binding) 3 (Cdc42  |
| Up at both hrs | A_65_P00921 | 1.25 | 0.009 | 1.48 | 0.033 NM_007523.1 | Bak1          | Mus musculus BCL2-antagonist/killer 1 (Bak1), mRNA                 |
| Up at both hrs | A_65_P03535 | 1.25 | 0.024 | 1.90 | 0.031             |               | UNKNOWN                                                            |
| Up at both hrs | A_65_P05304 | 1.25 | 0.009 | 1.34 | 0.047 NM_172529.1 | A830081F19    | UNKNOWN                                                            |
| Up at both hrs | A_65_P01944 | 1.25 | 0.028 | 1.25 | 0.002 NM_133206.1 | Zrfp1-pending | Mus musculus zinc ring finger protein 1 (Zrfp1-pending), mRNA      |
| Up at both hrs | A_65_P01402 | 1.25 | 0.047 | 1.38 | 0.024             |               | UNKNOWN                                                            |
| Up at both hrs | A_65_P01404 | 1.25 | 0.012 | 1.26 | 0.024 XM_129881.2 | MGC47289      | Mus musculus similar to RIKEN cDNA 1300010M03 [Mus musculus] (LOC  |
| Up at both hrs | A_65_P01136 | 1.24 | 0.018 | 1.49 | 0.041 AK013136.1  | 2510025K24Rik | Mus musculus RIKEN cDNA 2510025K24 gene (2510025K24Rik), mRNA      |
| Up at both hrs | A_65_P06758 | 1.24 | 0.003 | 1.22 | 0.008 XM_176741.1 | D11Moh35      | ADULT FEMALE PLACENTA CDNA, RIKEN FULL-LENGTH ENRICHED LIBRARY, C  |
| Up at both hrs | A_65_P04865 | 1.24 | 0.003 | 1.26 | 0.037             | Gna12         | Mus musculus guanine nucleotide binding protein, alpha 12 (Gna12)  |
| Up at both hrs | A_65_P02574 | 1.24 | 0.033 | 1.46 | 0.044 NM_013847.1 | Gcat          | Mus musculus glycine C-acetyltransferase (2-amino-3-ketobutyrate-  |
| Up at both hrs | A_65_P02391 | 1.24 | 0.013 | 1.26 | 0.002 NM_025920.1 | 2010320B01Rik | Mus musculus RIKEN cDNA 2010320B01 gene (2010320B01Rik), mRNA      |
| Up at both hrs | A_65_P03244 | 1.24 | 0.012 | 1.48 | 0.023 NM_009652.1 | Akt1          | Mus musculus thymoma viral proto-oncogene 1 (Akt1), mRNA           |
| Up at both hrs | A_65_P03820 | 1.24 | 0.012 | 1.38 | 0.017 NM_026428.1 | Dcxr          | Mus musculus dicarbonyl L-xylulose reductase (Dcxr), mRNA          |
| Up at both hrs | A_65_P01139 | 1.24 | 0.008 | 1.45 | 0.018             | 2310040G17Rik | UNKNOWN                                                            |
| Up at both hrs | A_65_P02557 | 1.24 | 0.050 | 1.22 | 0.038 BC021758.1  | Slc2a8        | Mus musculus solute carrier family 2, (facilitated glucose transp  |
| Up at both hrs | A_65_P13134 | 1.24 | 0.021 | 1.48 | 0.006             |               | UNKNOWN                                                            |
| Up at both hrs | A_65_P07156 | 1.23 | 0.023 | 1.68 | 0.013 AL833367.1  |               | UNKNOWN                                                            |
| Up at both hrs | A_65_P01015 | 1.23 | 0.039 | 1.38 | 0.014 BC016229.1  | AU015269      | UNKNOWN                                                            |
| Up at both hrs | A_65_P02881 | 1.23 | 0.039 | 1.25 | 0.009 NM_008187.1 | Gtl3          | Mus musculus gene trap locus 3 (Gtl3), mRNA                        |
| Up at both hrs | A_65_P01518 | 1.23 | 0.016 | 1.60 | 0.009 BC031544.1  | Facl5         | LONG CHAIN FATTY ACID COA LIGASE EC 6.2.1.3 LONG CHAIN ACYL COA S  |
| Up at both hrs | A_65_P04270 | 1.23 | 0.003 | 1.30 | 0.018 NM_020031.1 | Pfdn5         | PREFOLDIN SUBUNIT 5 C MYC BINDING PROTEIN MM 1 MYC MODULATOR       |
| Up at both hrs | A_65_P03609 | 1.23 | 0.030 | 1.18 | 0.026 NM_019702.1 | Hbs1l         | Mus musculus Hbs1-like (S. cerevisiae) (Hbs1l), mRNA               |
| Up at both hrs | A_65_P02189 | 1.22 | 0.017 | 1.32 | 0.020 NM_016721.1 | Iqgap1        | Mus musculus IQ motif containing GTPase activating protein 1 (Iqg  |

|                  |             |      |       |      |                   |               |                                                                   |
|------------------|-------------|------|-------|------|-------------------|---------------|-------------------------------------------------------------------|
| Up at both hrs   | A_65_P04780 | 1.22 | 0.029 | 1.32 | 0.012 XM_130932.2 | 1190004M21Rik | Mus musculus RIKEN cDNA 1190004M21 gene (1190004M21Rik), mRNA     |
| Up at both hrs   | A_65_P02928 | 1.22 | 0.019 | 1.42 | 0.014 NM_025883.1 | 2400007G07Rik | Mus musculus RIKEN cDNA 2400007G07 gene (2400007G07Rik), mRNA     |
| Up at both hrs   | A_65_P02286 | 1.22 | 0.011 | 1.43 | 0.035 NM_021719.1 | Cldn15        | Mus musculus claudin 15 (Cldn15), mRNA                            |
| Up at both hrs   | A_65_P02491 | 1.22 | 0.050 | 1.28 | 0.013 BC010256.1  | Mknk2         | Mus musculus, MAP kinase-interacting serine/threonine kinase 2, c |
| Up at both hrs   | A_65_P03323 | 1.21 | 0.042 | 1.51 | 0.001 NM_023472.1 | Ank2          | REPEAT-SEQUENCE                                                   |
| Up at both hrs   | A_65_P05321 | 1.21 | 0.030 | 1.19 | 0.003 XM_178423.1 | 1110008P04Rik | Mus musculus RIKEN cDNA 1110008P04 gene (1110008P04Rik), mRNA     |
| Up at both hrs   | A_65_P00951 | 1.20 | 0.002 | 1.28 | 0.008 XM_123751.1 | Brd3          | UNKNOWN                                                           |
| Up at both hrs   | A_65_P01596 | 1.20 | 0.005 | 1.42 | 0.034 NM_146135.1 | MGC27936      | Mus musculus protein inhibitor of activated STAT 3 (Pias3), mRNA  |
| Up at both hrs   | A_65_P03250 | 1.20 | 0.012 | 1.53 | 0.003 AK008102.1  | 2010004M13Rik | Intronic in U007699                                               |
| Up at both hrs   | A_65_P05773 | 1.20 | 0.006 | 1.26 | 0.002 BC030676.1  | D12Ert551e    | Mus musculus DNA segment, Chr 12, ERATO Doi 551, expressed (D12Er |
| Up at both hrs   | A_65_P07228 | 1.20 | 0.024 | 1.21 | 0.049             |               | hypothetical G-protein beta WD-40 repeats containing protein      |
| Up at both hrs   | A_65_P00780 | 1.19 | 0.006 | 1.19 | 0.027 NM_134096.1 | AW049604      | Mus musculus expressed sequence AW049604 (AW049604), mRNA         |
| Up at both hrs   | A_65_P03949 | 1.19 | 0.049 | 1.35 | 0.011 NM_028308.1 | AI256456      | Mus musculus expressed sequence AI256456 (AI256456), mRNA         |
| Up at both hrs   | A_65_P01822 | 1.19 | 0.027 | 1.10 | 0.023 NM_010212.1 | Fhl2          | Mus musculus four and a half LIM domains 2 (Fhl2), mRNA           |
| Up at both hrs   | A_65_P04331 | 1.18 | 0.028 | 1.24 | 0.026 XM_133156.1 | 2410197A17Rik | SUBUNIT                                                           |
| Up at both hrs   | A_65_P02859 | 1.18 | 0.046 | 1.29 | 0.035             | 2310057K14Rik | Mus musculus RIKEN cDNA 2310057K14 gene (2310057K14Rik), mRNA     |
| Up at both hrs   | A_65_P03141 | 1.18 | 0.001 | 1.35 | 0.019             |               | Intronic in U025671                                               |
| Up at both hrs   | A_65_P01221 | 1.18 | 0.029 | 1.33 | 0.002 NM_026995.1 | 2810407E01Rik | UNKNOWN                                                           |
| Up at both hrs   | A_65_P01880 | 1.18 | 0.023 | 1.22 | 0.041 NM_023651.1 | Pex13         | Mus musculus peroxisomal biogenesis factor 13 (Pex13), mRNA       |
| Up at both hrs   | A_65_P19321 | 1.18 | 0.036 | 1.22 | 0.035 XM_123746.1 | Asb6          | UNKNOWN                                                           |
| Up at both hrs   | A_65_P06622 | 1.17 | 0.017 | 1.26 | 0.029             |               | Intronic in U022662                                               |
| Up at both hrs   | A_65_P04958 | 1.17 | 0.035 | 1.25 | 0.037 NM_012001.1 | Cops4         | Mus musculus COP9 (constitutive photomorphogenic) homolog, subuni |
| Up at both hrs   | A_65_P10657 | 1.17 | 0.018 | 1.18 | 0.001 NM_031878.1 | Smarcd2       | Mus musculus SWI/SNF related, matrix associated, actin dependent  |
| Up at both hrs   | A_65_P03549 | 1.17 | 0.046 | 1.33 | 0.026 NM_009304.1 | Syng2         | Mus musculus synaptogyrin 2 (Syng2), mRNA                         |
| Up at both hrs   | A_65_P03293 | 1.17 | 0.049 | 1.24 | 0.043 XM_126735.2 | Gga3          | ADP RIBOSYLATION FACTOR BINDING PROTEIN GOLGI LOCALIZED, GAMMA EA |
| Up at both hrs   | A_65_P03641 | 1.17 | 0.028 | 1.20 | 0.008 XM_132874.1 | Nol1          | PROLIFERATING CELL NUCLEOLAR ANTIGEN P120 PROLIFERATION ASSOCIATE |
| Up at both hrs   | A_65_P09044 | 1.17 | 0.020 | 1.27 | 0.005 XM_125721.1 | Bsg           | BASIGIN PRECURSOR (BASIC IMMUNOGLOBULIN SUPERFAMILY) (MEMBRANE GL |
| Up at both hrs   | A_65_P02757 | 1.17 | 0.018 | 1.40 | 0.003             | Acinus        | Mus musculus apoptotic chromatin condensation inducer in the nucl |
| Up at both hrs   | A_65_P03056 | 1.17 | 0.016 | 1.28 | 0.014             |               | UNKNOWN                                                           |
| Up at both hrs   | A_65_P03151 | 1.17 | 0.008 | 1.44 | 0.028 XM_131463.1 | Mlit3         | AF 9                                                              |
| Up at both hrs   | A_65_P06812 | 1.17 | 0.037 | 1.19 | 0.006 NM_010176.1 | Fah           | Mus musculus fumarylacetoacetate hydrolase (Fah), mRNA            |
| Up at both hrs   | A_65_P06955 | 1.16 | 0.048 | 1.48 | 0.019             | 3300001M08Rik | Mus musculus RIKEN cDNA 3300001M08 gene (3300001M08Rik), mRNA     |
| Up at both hrs   | A_65_P06670 | 1.16 | 0.038 | 1.16 | 0.014 NM_172941.1 | D130067D09    | ZINC FINGER PROTEIN                                               |
| Up at both hrs   | A_65_P02379 | 1.16 | 0.029 | 1.45 | 0.035 AK004384.1  | D14Ert817e    | Mus musculus MAD homolog 4 interacting transcription coactivator  |
| Up at both hrs   | A_65_P07846 | 1.16 | 0.012 | 1.23 | 0.049 NM_053007.1 | Cntf          | Mus musculus ciliary neurotropic factor (Cntf), mRNA              |
| Up at both hrs   | A_65_P01921 | 1.16 | 0.041 | 1.61 | 0.003 NM_032235.1 | Npas2         | Mus musculus neuronal PAS domain protein 2 (Npas2), mRNA          |
| Up at both hrs   | A_65_P04018 | 1.16 | 0.035 | 1.35 | 0.010 BC037069.1  | 1110005F07Rik | Mus musculus RIKEN cDNA 1110005F07 gene (1110005F07Rik), mRNA     |
| Up at both hrs   | A_65_P20299 | 1.16 | 0.007 | 1.52 | 0.001 NM_019547.1 | Rnpc1         | Mus musculus RNA-binding region (RNP1, RRM) containing 1 (Rnpc1), |
| Up at both hrs   | A_65_P18079 | 1.16 | 0.010 | 1.13 | 0.022 NM_010325.1 | Got2          | Mus musculus glutamate oxaloacetate transaminase 2, mitochondrial |
| Up at both hrs   | A_65_P03042 | 1.15 | 0.050 | 1.45 | 0.014             | Entpd1        | Mus musculus ectonucleoside triphosphate diphosphohydrolase 1 (En |
| Up at both hrs   | A_65_P02874 | 1.15 | 0.006 | 1.82 | 0.005             | 4930515K21Rik | Intronic in U021211                                               |
| Up at both hrs   | A_65_P00755 | 1.14 | 0.035 | 1.36 | 0.012 NM_009410.1 | Top3a         | UNKNOWN                                                           |
| Up at both hrs   | A_65_P03598 | 1.14 | 0.025 | 1.31 | 0.041             |               | UNKNOWN                                                           |
| Up at both hrs   | A_65_P01985 | 1.14 | 0.031 | 1.18 | 0.005             | Ubh1          | UBIQUITIN HYDROLYZING ENZYME 1. [Source:SPTREMBL;Acc:Q9D9M2]      |
| Up at both hrs   | A_65_P01636 | 1.14 | 0.022 | 1.30 | 0.015 XM_132859.1 | Foxm1         | Mus musculus forkhead box M1 (Foxm1), mRNA                        |
| Up at both hrs   | A_65_P02891 | 1.13 | 0.033 | 1.23 | 0.031             |               | UNKNOWN                                                           |
| Up at both hrs   | A_65_P02739 | 1.12 | 0.026 | 1.21 | 0.008 BC026908.1  |               | 8 DAYS EMBRYO CDNA, RIKEN FULL-LENGTH ENRICHED LIBRARY, CLONE:573 |
| Up at both hrs   | A_65_P11538 | 1.12 | 0.009 | 1.20 | 0.022 NM_145978.1 | MGC37634      | Mus musculus hypothetical protein MGC37634 (MGC37634), mRNA       |
| Up at both hrs   | A_65_P11353 | 1.12 | 0.039 | 1.22 | 0.042 NM_019747.1 | Zfp113        | Mus musculus zinc finger protein 113 (Zfp113), mRNA               |
| Up at both hrs   | A_65_P16470 | 1.12 | 0.007 | 1.32 | 0.037 XM_134371.2 | 4930566A11Rik | Mus musculus RIKEN cDNA 4930566A11 gene (4930566A11Rik), mRNA     |
| Up at both hrs   | A_65_P03238 | 1.11 | 0.038 | 1.50 | 0.003 XM_128650.2 | 9330185D23    | SEVEN TRANSMEMBRANE                                               |
| Up at both hrs   | A_65_P04303 | 1.11 | 0.001 | 1.31 | 0.003 NM_007763.1 | Crip          | Mus musculus cysteine rich intestinal protein (Crip), mRNA        |
| Up at both hrs   | A_65_P01300 | 1.10 | 0.011 | 1.22 | 0.041 XM_126162.1 | Timm22        | Mus musculus translocase of inner mitochondrial membrane 22 homol |
| Up at both hrs   | A_65_P06708 | 1.10 | 0.045 | 1.17 | 0.005 XM_129768.2 | PAPK          | weakly similar to AMYOTROPHIC LATERAL SCLEROSIS 2 (CDNA FLJ14731  |
| Up at both hrs   | A_65_P02251 | 1.10 | 0.023 | 1.15 | 0.046 BC016198.1  |               | ADULT MALE TESTIS CDNA, RIKEN FULL-LENGTH ENRICHED LIBRARY, CLONE |
| Up at both hrs   | A_65_P03243 | 1.08 | 0.003 | 1.31 | 0.020 BC031767.1  | LOC55933      | Mus musculus putative lysophosphatidic acid acyltransferase (LOC5 |
| Up at both hrs   | A_65_P02653 | 1.08 | 0.030 | 1.29 | 0.015             | 1810048F22Rik | ZINC FINGER PROTEIN 9 (KRUPPEL SEGMENTATION-RELATED PROTEIN KROX- |
| Down at both hrs | A_65_P10228 | 0.95 | 0.044 | 0.77 | 0.005 NM_025525.1 | 2310020H19Rik | Mus musculus RIKEN cDNA 2310020H19 gene (2310020H19Rik), mRNA     |



|                  |             |      |       |      |                   |               |                                                                   |
|------------------|-------------|------|-------|------|-------------------|---------------|-------------------------------------------------------------------|
| Down at both hrs | A_65_P13286 | 0.84 | 0.039 | 0.84 | 0.012             | 4732418C03Rik | UNKNOWN (PROTEIN FOR MGC:11761). [Source:SPTR EMBL;Acc:Q91W18]    |
| Down at both hrs | A_65_P17468 | 0.84 | 0.018 | 0.83 | 0.003             |               | UNKNOWN                                                           |
| Down at both hrs | A_65_P14836 | 0.84 | 0.019 | 0.80 | 0.048 BC027341.1  |               | ELONGATION FACTOR                                                 |
| Down at both hrs | A_65_P11680 | 0.83 | 0.015 | 0.81 | 0.039 NM_007888.1 | Dvl2          | Mus musculus dishevelled 2, dsh homolog (Drosophila) (Dvl2), mRNA |
| Down at both hrs | A_65_P15348 | 0.83 | 0.005 | 0.80 | 0.004             | C85143        | UNKNOWN                                                           |
| Down at both hrs | A_65_P14487 | 0.83 | 0.031 | 0.79 | 0.016             |               | Intronic in U009777                                               |
| Down at both hrs | A_65_P15694 | 0.83 | 0.029 | 0.49 | 0.012 NM_147217.1 | 3200002M13Rik | Mus musculus RIKEN cDNA 3200002M13 gene (3200002M13Rik), mRNA     |
| Down at both hrs | A_65_P14187 | 0.83 | 0.025 | 0.77 | 0.028             | Golga3        | Mus musculus golgi autoantigen, golgin subfamily a, 3 (Golga3), m |
| Down at both hrs | A_65_P09096 | 0.83 | 0.009 | 0.72 | 0.013 BC005460.1  | Ncl           | Mus musculus nucleolin (Ncl), mRNA                                |
| Down at both hrs | A_65_P13623 | 0.83 | 0.034 | 0.86 | 0.042 XM_149328.2 |               | UNKNOWN                                                           |
| Down at both hrs | A_65_P14674 | 0.83 | 0.039 | 0.84 | 0.049             |               | Intronic in U038950                                               |
| Down at both hrs | A_65_P09863 | 0.83 | 0.025 | 0.76 | 0.004 NM_025301.1 | Mrpl17        | Mus musculus mitochondrial ribosomal protein L17 (Mrpl17), mRNA   |
| Down at both hrs | A_65_P13112 | 0.83 | 0.001 | 0.82 | 0.004             | A1847581      | Mus musculus rhomboid like gene 4 (Drosophila) (Rhbdl4), mRNA     |
| Down at both hrs | A_65_P14593 | 0.83 | 0.009 | 0.76 | 0.000             |               | UNKNOWN                                                           |
| Down at both hrs | A_65_P18388 | 0.83 | 0.031 | 0.70 | 0.045 XM_203771.1 | Mapkapk2      | MAP KINASE-ACTIVATED PROTEIN KINASE 2 (EC 2.7.1.-) (MAPK-ACTIVATE |
| Down at both hrs | A_65_P14895 | 0.83 | 0.050 | 0.81 | 0.020 AK007507.1  | 1810015C11Rik | Similar to: Mus musculus 16 days embryo head cDNA, RIKEN full-len |
| Down at both hrs | A_65_P15144 | 0.82 | 0.003 | 0.82 | 0.020             | Pfpl          | Mus musculus pore forming protein-like (Pfpl), mRNA               |
| Down at both hrs | A_65_P14376 | 0.82 | 0.043 | 0.74 | 0.034             |               | UNKNOWN                                                           |
| Down at both hrs | A_65_P10820 | 0.82 | 0.012 | 0.73 | 0.013             |               | Intronic in U007246                                               |
| Down at both hrs | A_65_P12414 | 0.82 | 0.019 | 0.77 | 0.036             | AW551225      | Intronic in U026596                                               |
| Down at both hrs | A_65_P15440 | 0.82 | 0.042 | 0.74 | 0.017 NM_025633.1 | Metap1        | Mus musculus methionine aminopeptidase-like 1 (Metap1), mRNA      |
| Down at both hrs | A_65_P14328 | 0.82 | 0.017 | 0.87 | 0.048 NM_015772.1 | Sall2         | Mus musculus sal-like 2 (Drosophila) (Sall2), mRNA                |
| Down at both hrs | A_65_P13820 | 0.82 | 0.035 | 0.78 | 0.048             |               | REPEAT-SEQUENCE                                                   |
| Down at both hrs | A_65_P15050 | 0.82 | 0.013 | 0.77 | 0.016 NM_012006.1 | Cte1          | Mus musculus cytosolic acyl-CoA thioesterase 1 (Cte1), mRNA       |
| Down at both hrs | A_65_P18160 | 0.82 | 0.036 | 0.76 | 0.047 NM_146066.1 | Gspt1         | Mus musculus G1 to phase transition 1 (Gspt1), mRNA               |
| Down at both hrs | A_65_P13818 | 0.82 | 0.017 | 0.71 | 0.000 NM_172775.1 | Ptxnb1        | PLEXIN A3 PRECURSOR PLEXIN 4 TRANSMEMBRANE PROTEIN                |
| Down at both hrs | A_65_P19809 | 0.81 | 0.009 | 0.63 | 0.044             | Vti1a         | Mus musculus vesicle transport through interaction with t-SNAREs  |
| Down at both hrs | A_65_P14948 | 0.81 | 0.013 | 0.89 | 0.023 AE014175.1  | BB166060      | UNKNOWN                                                           |
| Down at both hrs | A_65_P11302 | 0.81 | 0.015 | 0.77 | 0.036             |               | UNKNOWN                                                           |
| Down at both hrs | A_65_P17735 | 0.81 | 0.025 | 0.69 | 0.044             |               | Intronic in U027680                                               |
| Down at both hrs | A_65_P11436 | 0.81 | 0.010 | 0.87 | 0.009             |               | UNKNOWN                                                           |
| Down at both hrs | A_65_P12676 | 0.81 | 0.021 | 0.82 | 0.035 NM_144525.1 | 1110039B18Rik | Mus musculus RIKEN cDNA 1110039B18 gene (1110039B18Rik), mRNA     |
| Down at both hrs | A_65_P16275 | 0.81 | 0.022 | 0.80 | 0.027             | D7Wsu69e      | UNKNOWN                                                           |
| Down at both hrs | A_65_P09294 | 0.81 | 0.031 | 0.77 | 0.016 S47577.1    | Msn           | Mus musculus moesin (Msn), mRNA                                   |
| Down at both hrs | A_65_P14799 | 0.80 | 0.024 | 0.81 | 0.036             |               | UNKNOWN                                                           |
| Down at both hrs | A_65_P13833 | 0.80 | 0.040 | 0.89 | 0.004 NM_011873.1 | Prtb          | Mus musculus proline rich protein expressed in brain (Prtb), mRNA |
| Down at both hrs | A_65_P11067 | 0.80 | 0.002 | 0.78 | 0.047 AC084274.12 |               | Intronic in U017219                                               |
| Down at both hrs | A_65_P16270 | 0.80 | 0.048 | 0.84 | 0.005             |               | Intronic in U012090                                               |
| Down at both hrs | A_65_P17053 | 0.80 | 0.011 | 0.64 | 0.016             |               | UNKNOWN                                                           |
| Down at both hrs | A_65_P02299 | 0.80 | 0.009 | 0.68 | 0.016 XM_176871.1 |               | similar to DEATH RECEPTOR-INTERACTING PROTEIN [Homo sapiens]      |
| Down at both hrs | A_65_P14174 | 0.79 | 0.020 | 0.87 | 0.012             |               | UNKNOWN                                                           |
| Down at both hrs | A_65_P19506 | 0.79 | 0.032 | 0.84 | 0.002             | C79685        | UNKNOWN                                                           |
| Down at both hrs | A_65_P13797 | 0.79 | 0.010 | 0.75 | 0.013             |               | UNKNOWN                                                           |
| Down at both hrs | A_65_P16379 | 0.79 | 0.041 | 0.86 | 0.035             |               | Intronic in U036052                                               |
| Down at both hrs | A_65_P15065 | 0.79 | 0.041 | 0.72 | 0.029             |               | UNKNOWN                                                           |
| Down at both hrs | A_65_P12318 | 0.79 | 0.004 | 0.77 | 0.017 NM_144835.1 | MGC30806      | Mus musculus hypothetical protein MGC30806 (MGC30806), mRNA       |
| Down at both hrs | A_65_P17317 | 0.79 | 0.030 | 0.84 | 0.006             |               | UNKNOWN                                                           |
| Down at both hrs | A_65_P16943 | 0.79 | 0.041 | 0.71 | 0.041             |               | UNKNOWN                                                           |
| Down at both hrs | A_65_P10896 | 0.79 | 0.003 | 0.66 | 0.018             |               | UNKNOWN                                                           |
| Down at both hrs | A_65_P10261 | 0.79 | 0.037 | 0.77 | 0.019 XM_125835.1 | AW551239      | hypothetical DNA ligase/mRNA capping enzyme, catalytic domain str |
| Down at both hrs | A_65_P15327 | 0.79 | 0.013 | 0.76 | 0.039 NM_020153.2 |               | UNKNOWN                                                           |
| Down at both hrs | A_65_P18751 | 0.79 | 0.002 | 0.71 | 0.005             |               | Intronic in U033984                                               |
| Down at both hrs | A_65_P17562 | 0.79 | 0.033 | 0.80 | 0.025 XM_130521.1 | 3300001M20Rik | hypothetical S-adenosyl-L-methionine-dependent methyltransferases |
| Down at both hrs | A_65_P16503 | 0.79 | 0.022 | 0.74 | 0.036 NM_010424.1 | Hfe           | Mus musculus hemochromatosis (Hfe), mRNA                          |
| Down at both hrs | A_65_P13927 | 0.79 | 0.012 | 0.73 | 0.026             |               | Intronic in U033903                                               |
| Down at both hrs | A_65_P13072 | 0.78 | 0.004 | 0.81 | 0.033             |               | UNKNOWN                                                           |
| Down at both hrs | A_65_P13721 | 0.78 | 0.024 | 0.76 | 0.034 NM_030711.1 | Arts1-pending | Mus musculus type 1 tumor necrosis factor receptor shedding amino |
| Down at both hrs | A_65_P15895 | 0.78 | 0.029 | 0.77 | 0.035             |               | UNKNOWN                                                           |

|                  |             |      |       |      |       |             |               |                                                                    |
|------------------|-------------|------|-------|------|-------|-------------|---------------|--------------------------------------------------------------------|
| Down at both hrs | A_65_P11189 | 0.78 | 0.008 | 0.78 | 0.016 | NM_013700.1 | Usp5          | Mus musculus ubiquitin specific protease 5 (isopeptidase T) (Usp5) |
| Down at both hrs | A_65_P12666 | 0.78 | 0.045 | 0.70 | 0.039 | NM_028771.1 | 1200014H14Rik | Mus musculus RIKEN cDNA 1200014H14 gene (1200014H14Rik), mRNA      |
| Down at both hrs | A_65_P11456 | 0.78 | 0.007 | 0.75 | 0.029 |             |               | UNKNOWN                                                            |
| Down at both hrs | A_65_P11305 | 0.78 | 0.006 | 0.71 | 0.048 |             |               | UNKNOWN                                                            |
| Down at both hrs | A_65_P09882 | 0.78 | 0.023 | 0.62 | 0.010 | NM_009498.1 | Vamp3         | Mus musculus vesicle-associated membrane protein 3 (Vamp3), mRNA   |
| Down at both hrs | A_65_P09687 | 0.78 | 0.006 | 0.62 | 0.010 |             |               | Intronic in U005364                                                |
| Down at both hrs | A_65_P15035 | 0.78 | 0.018 | 0.50 | 0.036 |             |               | weakly similar to KIAA1058 protein {Homo sapiens}                  |
| Down at both hrs | A_65_P13943 | 0.77 | 0.028 | 0.83 | 0.015 |             | Mtap6         | Mus musculus microtubule-associated protein 6 (Mtap6), mRNA        |
| Down at both hrs | A_65_P15672 | 0.77 | 0.028 | 0.88 | 0.028 | NM_172992.1 | 9530062N20    | weakly similar to PUTATIVE HOMEODOMAIN TRANSCRIPTION FACTOR 1 (PH  |
| Down at both hrs | A_65_P14654 | 0.77 | 0.043 | 0.64 | 0.030 |             |               | UNKNOWN                                                            |
| Down at both hrs | A_65_P13274 | 0.77 | 0.009 | 0.67 | 0.003 |             |               | Similar to: Mus musculus 16 days neonate thymus cDNA, RIKEN full-  |
| Down at both hrs | A_65_P16017 | 0.77 | 0.047 | 0.71 | 0.031 |             |               | UNKNOWN                                                            |
| Down at both hrs | A_65_P12484 | 0.77 | 0.033 | 0.70 | 0.047 |             | AI851387      | Mus musculus RIKEN cDNA 1110020B03 gene (1110020B03Rik), mRNA      |
| Down at both hrs | A_65_P16283 | 0.76 | 0.020 | 0.78 | 0.035 |             |               | UNKNOWN                                                            |
| Down at both hrs | A_65_P15611 | 0.76 | 0.043 | 0.80 | 0.043 | XM_130744.1 | 1700019H03Rik | similar to BA305P22.2.5 (NOVEL PROTEIN, ISOFORM 5) (FRAGMENT) [Ho  |
| Down at both hrs | A_65_P09389 | 0.76 | 0.003 | 0.61 | 0.000 |             |               | Intronic in U043043                                                |
| Down at both hrs | A_65_P12478 | 0.76 | 0.034 | 0.59 | 0.030 | AY115493.1  | E11           | UNKNOWN                                                            |
| Down at both hrs | A_65_P15983 | 0.76 | 0.005 | 0.57 | 0.048 | XM_132755.1 | 2410002E02Rik | Mus musculus RIKEN cDNA 2410002E02 gene (2410002E02Rik), mRNA      |
| Down at both hrs | A_65_P12512 | 0.76 | 0.035 | 0.52 | 0.002 | NM_029338.1 | 1700027N10Rik | Mus musculus RIKEN cDNA 1700027N10 gene (1700027N10Rik), mRNA      |
| Down at both hrs | A_65_P15310 | 0.76 | 0.032 | 0.74 | 0.026 | NM_145611.1 | BC010245      | Mus musculus cDNA sequence BC010245 (BC010245), mRNA               |
| Down at both hrs | A_65_P18606 | 0.76 | 0.025 | 0.64 | 0.008 |             |               | Intronic in U030988                                                |
| Down at both hrs | A_65_P11108 | 0.76 | 0.007 | 0.72 | 0.001 | XM_128418.1 | 1700008H23Rik | Mus musculus RIKEN cDNA 1700008H23 gene (1700008H23Rik), mRNA      |
| Down at both hrs | A_65_P17326 | 0.75 | 0.004 | 0.81 | 0.041 | BC024337.1  | D10Ert322e    | UNKNOWN                                                            |
| Down at both hrs | A_65_P09592 | 0.75 | 0.027 | 0.38 | 0.028 |             |               | UNKNOWN                                                            |
| Down at both hrs | A_65_P14925 | 0.75 | 0.047 | 0.78 | 0.009 |             |               | REPEAT-SEQUENCE                                                    |
| Down at both hrs | A_65_P16183 | 0.75 | 0.022 | 0.74 | 0.016 | XM_176679.1 |               | Mus musculus similar to hypothetical protein, similar to (AB02164  |
| Down at both hrs | A_65_P17388 | 0.75 | 0.006 | 0.70 | 0.018 |             | Enh-pending   | Mus musculus enigma homolog (R. norvegicus) (Enh-pending), mRNA    |
| Down at both hrs | A_65_P10999 | 0.75 | 0.048 | 0.59 | 0.019 |             | AI852640      | UNKNOWN                                                            |
| Down at both hrs | A_65_P11011 | 0.75 | 0.018 | 0.67 | 0.003 | AK008789.1  | 2210401J11Rik | Mus musculus adult male stomach cDNA, RIKEN full-length enriched   |
| Down at both hrs | A_65_P15046 | 0.75 | 0.036 | 0.70 | 0.026 | NM_025976.1 | 3010001A07Rik | Mus musculus RIKEN cDNA 3010001A07 gene (3010001A07Rik), mRNA      |
| Down at both hrs | A_65_P11760 | 0.75 | 0.024 | 0.64 | 0.050 |             |               | Intronic in U039487                                                |
| Down at both hrs | A_65_P18952 | 0.74 | 0.039 | 0.62 | 0.023 | BC024628.1  | 2810405F18Rik | Mus musculus RIKEN cDNA 2810405F18 gene (2810405F18Rik), mRNA      |
| Down at both hrs | A_65_P14827 | 0.74 | 0.025 | 0.63 | 0.015 | BC037701.1  | Slc35a2       | Mus musculus solute carrier family 35 (UDP-galactose transporter)  |
| Down at both hrs | A_65_P19183 | 0.74 | 0.001 | 0.78 | 0.013 | NM_007553.1 | Bmp2          | Mus musculus bone morphogenetic protein 2 (Bmp2), mRNA             |
| Down at both hrs | A_65_P14589 | 0.74 | 0.044 | 0.73 | 0.028 | BC010489.1  |               | Mus musculus septin 6 (Sept6), mRNA                                |
| Down at both hrs | A_65_P20325 | 0.74 | 0.031 | 0.85 | 0.001 | NM_015799.1 | Trfr2         | Mus musculus transferrin receptor 2 (Trfr2), mRNA                  |
| Down at both hrs | A_65_P11739 | 0.74 | 0.024 | 0.75 | 0.023 |             |               | UNKNOWN                                                            |
| Down at both hrs | A_65_P14184 | 0.74 | 0.004 | 0.65 | 0.049 | XM_149566.1 | AA408865      | Mus musculus LOC230913 (LOC230913), mRNA                           |
| Down at both hrs | A_65_P15136 | 0.73 | 0.041 | 0.51 | 0.000 | BC013052.1  | Dp1           | Mus musculus deleted in polyposis 1 (Dp1), mRNA                    |
| Down at both hrs | A_65_P14124 | 0.73 | 0.032 | 0.77 | 0.001 | XM_130231.1 | Nr5a1         | Mus musculus nuclear receptor subfamily 5, group A, member 1 (Nr5  |
| Down at both hrs | A_65_P10145 | 0.73 | 0.029 | 0.74 | 0.044 |             |               | Intronic in U018867                                                |
| Down at both hrs | A_65_P14116 | 0.73 | 0.014 | 0.73 | 0.025 | NM_011640.1 | Trp53         | Mus musculus transformation related protein 53 (Trp53), mRNA       |
| Down at both hrs | A_65_P17698 | 0.73 | 0.050 | 0.62 | 0.042 | XM_141399.1 |               | UNKNOWN                                                            |
| Down at both hrs | A_65_P17630 | 0.72 | 0.021 | 0.75 | 0.024 |             | 2810047L02Rik | similar to CDNA FLJ14745 FIS, CLONE NT2RP3002785, WEAKLY SIMILAR   |
| Down at both hrs | A_65_P11947 | 0.72 | 0.006 | 0.54 | 0.026 |             |               | UNKNOWN                                                            |
| Down at both hrs | A_65_P15709 | 0.72 | 0.018 | 0.74 | 0.012 | AF271660.1  |               | UNKNOWN                                                            |
| Down at both hrs | A_65_P16927 | 0.72 | 0.045 | 0.79 | 0.026 | NM_009101.1 | Rras          | Mus musculus Harvey rat sarcoma oncogene, subgroup R (Rras), mRNA  |
| Down at both hrs | A_65_P09887 | 0.72 | 0.005 | 0.65 | 0.044 |             |               | Intronic in U029617                                                |
| Down at both hrs | A_65_P14566 | 0.72 | 0.028 | 0.65 | 0.046 |             |               | Intronic in U017107                                                |
| Down at both hrs | A_65_P15322 | 0.72 | 0.004 | 0.54 | 0.002 |             | 2610507L03Rik | Mus musculus RIKEN cDNA 2610507L03 gene (2610507L03Rik), mRNA      |
| Down at both hrs | A_65_P19208 | 0.72 | 0.042 | 0.70 | 0.034 |             |               | Intronic in U022188                                                |
| Down at both hrs | A_65_P13905 | 0.72 | 0.014 | 0.50 | 0.004 | NM_025901.1 | 1500004O14Rik | Mus musculus RIKEN cDNA 1500004O14 gene (1500004O14Rik), mRNA      |
| Down at both hrs | A_65_P11476 | 0.72 | 0.050 | 0.67 | 0.035 | NM_010177.1 | Tnfsf6        | Mus musculus tumor necrosis factor (ligand) superfamily, member 6  |
| Down at both hrs | A_65_P14946 | 0.72 | 0.005 | 0.58 | 0.031 |             |               | UNKNOWN                                                            |
| Down at both hrs | A_65_P12326 | 0.72 | 0.049 | 0.58 | 0.044 | BC023066.1  |               | CLATHRIN COAT ASSEMBLY PROTEIN AP17 (CLATHRIN COAT ASSOCIATED PRO  |
| Down at both hrs | A_65_P10286 | 0.71 | 0.038 | 0.55 | 0.043 | NM_009970.1 | Csf2ra        | Similar to: Mus musculus colony stimulating factor 2 receptor, al  |
| Down at both hrs | A_65_P11943 | 0.71 | 0.001 | 0.65 | 0.034 | BC038177.1  |               | hypothetical Calponin homology (CH) domain/Calponin homology doma  |
| Down at both hrs | A_65_P13839 | 0.71 | 0.031 | 0.50 | 0.016 |             |               | Similar to: Mus musculus 16 days embryo head cDNA, RIKEN full-len  |



|                  |             |      |       |      |                   |               |                                                                    |
|------------------|-------------|------|-------|------|-------------------|---------------|--------------------------------------------------------------------|
| Down at both hrs | A_65_P17609 | 0.71 | 0.031 | 0.50 | 0.036 BC023185.1  | 5730504C04Rik | MYOSIN HEAVY CHAIN, NONMUSCLE TYPE B (CELLULAR MYOSIN HEAVY CHAIN  |
| Down at both hrs | A_65_P14129 | 0.71 | 0.033 | 0.79 | 0.042             |               | UNKNOWN                                                            |
| Down at both hrs | A_65_P11556 | 0.71 | 0.044 | 0.71 | 0.049 XM_133701.1 | Pde3b         | CGMP-INHIBITED 3,5-CYCLIC PHOSPHODIESTERASE B (EC 3.1.4.17) (CYCL  |
| Down at both hrs | A_65_P16337 | 0.71 | 0.004 | 0.79 | 0.009 AK013795.1  | 2900076A13Rik | Intronic in U002460                                                |
| Down at both hrs | A_65_P17893 | 0.70 | 0.009 | 0.61 | 0.020             |               | REPEAT-SEQUENCE                                                    |
| Down at both hrs | A_65_P18203 | 0.70 | 0.042 | 0.76 | 0.008             |               | Intronic in U036755                                                |
| Down at both hrs | A_65_P09445 | 0.70 | 0.045 | 0.46 | 0.030 XM_148421.1 | 2410005K20Rik | hypothetical Ribosomal protein L1 containing protein               |
| Down at both hrs | A_65_P10616 | 0.69 | 0.047 | 0.73 | 0.043 XM_129578.1 | 8430421H08Rik | Mus musculus expressed in hematopoietic cells, heart, liver (HhI-  |
| Down at both hrs | A_65_P11946 | 0.69 | 0.024 | 0.72 | 0.030             | 3110056M06Rik | Mus musculus RIKEN cDNA 3110056M06 gene (3110056M06Rik), mRNA      |
| Down at both hrs | A_65_P15435 | 0.69 | 0.039 | 0.55 | 0.048             | Taf6          | UNKNOWN                                                            |
| Down at both hrs | A_65_P18949 | 0.69 | 0.019 | 0.71 | 0.041 XM_086858.3 | 2610304F09Rik | UNKNOWN                                                            |
| Down at both hrs | A_65_P17111 | 0.69 | 0.012 | 0.56 | 0.031 NM_152814.1 | 2700043M03Rik | similar to CDNA FLJ14779 FIS, CLONE NT2RP4000398, MODERATELY SIMI  |
| Down at both hrs | A_65_P14801 | 0.68 | 0.048 | 0.62 | 0.028 BC020150.1  | 9030411K21Rik | Intronic in U010705                                                |
| Down at both hrs | A_65_P15227 | 0.68 | 0.032 | 0.50 | 0.041             |               | UNKNOWN                                                            |
| Down at both hrs | A_65_P11937 | 0.68 | 0.040 | 0.39 | 0.039 NM_000125.1 | ESR1          | Mus musculus estrogen receptor 1 (alpha) (Esr1), mRNA              |
| Down at both hrs | A_65_P13443 | 0.68 | 0.008 | 0.65 | 0.040             |               | UNKNOWN                                                            |
| Down at both hrs | A_65_P11000 | 0.68 | 0.030 | 0.57 | 0.036             |               | Intronic in U009624                                                |
| Down at both hrs | A_65_P14547 | 0.68 | 0.002 | 0.69 | 0.026 XM_139863.1 |               | UNKNOWN                                                            |
| Down at both hrs | A_65_P12581 | 0.68 | 0.031 | 0.77 | 0.021             |               | Intronic in U021371                                                |
| Down at both hrs | A_65_P13452 | 0.67 | 0.023 | 0.58 | 0.036 AJ421479.1  | Chic1         | CYSTEINE-RICH HYDROPHOBIC 1 (CHIC1) PROTEIN (FRAGMENT). [Source:S  |
| Down at both hrs | A_65_P13997 | 0.67 | 0.039 | 0.65 | 0.014             |               | UNKNOWN                                                            |
| Down at both hrs | A_65_P13722 | 0.67 | 0.012 | 0.72 | 0.014             |               | UNKNOWN                                                            |
| Down at both hrs | A_65_P19714 | 0.66 | 0.040 | 0.65 | 0.016             | 2410016O06Rik | UNKNOWN                                                            |
| Down at both hrs | A_65_P17041 | 0.66 | 0.050 | 0.41 | 0.013             |               | Intronic in U013691                                                |
| Down at both hrs | A_65_P09532 | 0.66 | 0.038 | 0.78 | 0.039             |               | Mus musculus LOC244840 (LOC244840), mRNA                           |
| Down at both hrs | A_65_P17287 | 0.66 | 0.005 | 0.60 | 0.048 XM_128379.2 |               | UNKNOWN                                                            |
| Down at both hrs | A_65_P14837 | 0.66 | 0.038 | 0.38 | 0.022 NM_029320.1 | D14ErtD581e   | Mus musculus RIKEN cDNA 4930513H15 gene (4930513H15Rik), mRNA      |
| Down at both hrs | A_65_P17046 | 0.66 | 0.025 | 0.76 | 0.037             |               | UNKNOWN                                                            |
| Down at both hrs | A_65_P18995 | 0.66 | 0.034 | 0.71 | 0.020             | D4ErtD31e     | UNKNOWN                                                            |
| Down at both hrs | A_65_P18558 | 0.65 | 0.008 | 0.66 | 0.018 M61704.1    | Akp5          | Mus musculus alkaline phosphatase 5 (Akp5), mRNA                   |
| Down at both hrs | A_65_P14293 | 0.65 | 0.023 | 0.59 | 0.008             |               | MYOCILIN PRECURSOR TRABECULAR MESHWORK INDUCED GLUCOCORTICOID RES  |
| Down at both hrs | A_65_P15612 | 0.65 | 0.008 | 0.60 | 0.019             |               | UNKNOWN                                                            |
| Down at both hrs | A_65_P13524 | 0.64 | 0.023 | 0.56 | 0.037 U95119.1    | Pafah1b1      | Similar to: Mus musculus Pafaha/Lis1 exon 3, complete sequence     |
| Down at both hrs | A_65_P14759 | 0.64 | 0.046 | 0.60 | 0.015 AK007605.1  | 1810026C22Rik | Mus musculus geranylgeranyl diphosphate synthase 1 (Ggps1), mRNA   |
| Down at both hrs | A_65_P18546 | 0.63 | 0.047 | 0.59 | 0.017             |               | UNKNOWN                                                            |
| Down at both hrs | A_65_P14358 | 0.63 | 0.017 | 0.73 | 0.030             |               | Intronic in U023277                                                |
| Down at both hrs | A_65_P14551 | 0.63 | 0.010 | 0.48 | 0.022             |               | UNKNOWN                                                            |
| Down at both hrs | A_65_P15210 | 0.63 | 0.011 | 0.60 | 0.001             | AU015723      | UNKNOWN                                                            |
| Down at both hrs | A_65_P17012 | 0.62 | 0.039 | 0.72 | 0.015             |               | UNKNOWN                                                            |
| Down at both hrs | A_65_P13160 | 0.62 | 0.008 | 0.57 | 0.044             |               | UNKNOWN                                                            |
| Down at both hrs | A_65_P13479 | 0.62 | 0.044 | 0.55 | 0.034             |               | UNKNOWN                                                            |
| Down at both hrs | A_65_P14201 | 0.62 | 0.008 | 0.57 | 0.034 XM_131925.1 | 2810450M21Rik | RAD50 INTERACTING PROTEIN                                          |
| Down at both hrs | A_65_P19213 | 0.62 | 0.016 | 0.51 | 0.030             |               | Intronic in U015360                                                |
| Down at both hrs | A_65_P11770 | 0.62 | 0.027 | 0.44 | 0.045 NM_031166.1 | ldb4          | Mus musculus inhibitor of DNA binding 4 (ldb4), mRNA               |
| Down at both hrs | A_65_P19562 | 0.61 | 0.034 | 0.64 | 0.034             |               | Intronic in U018867                                                |
| Down at both hrs | A_65_P11442 | 0.61 | 0.043 | 0.60 | 0.032             |               | Intronic in U041973                                                |
| Down at both hrs | A_65_P19332 | 0.61 | 0.035 | 0.52 | 0.012             |               | Intronic in U015289                                                |
| Down at both hrs | A_65_P11369 | 0.61 | 0.003 | 0.42 | 0.013             |               | UNKNOWN                                                            |
| Down at both hrs | A_65_P12329 | 0.61 | 0.019 | 0.59 | 0.008             |               | Intronic in U013849                                                |
| Down at both hrs | A_65_P15117 | 0.61 | 0.012 | 0.51 | 0.001 NM_016699.1 | Pmscl2        | Mus musculus polymyositis/scleroderma autoantigen 2 (Pmscl2), mRNA |
| Down at both hrs | A_65_P16083 | 0.61 | 0.021 | 0.64 | 0.030             |               | UNKNOWN                                                            |
| Down at both hrs | A_65_P15516 | 0.61 | 0.004 | 0.47 | 0.001             |               | Intronic in U033428                                                |
| Down at both hrs | A_65_P11941 | 0.60 | 0.043 | 0.58 | 0.016 XM_149778.1 | M6pr          | Similar to: Mus musculus hypothetical gene supported by X64070 (L  |
| Down at both hrs | A_65_P18842 | 0.60 | 0.038 | 0.51 | 0.009 AK009219.1  | 2310008B10Rik | Intronic in U023544                                                |
| Down at both hrs | A_65_P16152 | 0.59 | 0.008 | 0.63 | 0.020             |               | UNKNOWN                                                            |
| Down at both hrs | A_65_P16064 | 0.59 | 0.024 | 0.55 | 0.001             | 2210019E14Rik | hypothetical TPR repeat containing protein                         |
| Down at both hrs | A_65_P13367 | 0.59 | 0.031 | 0.48 | 0.041 XM_159101.1 | AU022751      | Similar to: Mus musculus LOC208429 (LOC208429), mRNA               |
| Down at both hrs | A_65_P17990 | 0.59 | 0.048 | 0.60 | 0.007 NM_024203.1 | 4932442K08Rik | hypothetical Resolvase-like structure containing protein           |

|                  |             |      |       |      |       |             |               |                                                                   |
|------------------|-------------|------|-------|------|-------|-------------|---------------|-------------------------------------------------------------------|
| Down at both hrs | A_65_P18848 | 0.59 | 0.043 | 0.58 | 0.028 | NM_008688.1 | Nfic          | Mus musculus nuclear factor I/C (Nfic), mRNA                      |
| Down at both hrs | A_65_P13083 | 0.59 | 0.020 | 0.60 | 0.046 |             |               | UNKNOWN                                                           |
| Down at both hrs | A_65_P12870 | 0.58 | 0.029 | 0.48 | 0.022 |             | 1500016H10Rik | UNKNOWN                                                           |
| Down at both hrs | A_65_P18783 | 0.58 | 0.045 | 0.31 | 0.044 | XM_130385.1 | 0610009I22Rik | Mus musculus RIKEN cDNA 0610009I22 gene (0610009I22Rik), mRNA     |
| Down at both hrs | A_65_P13223 | 0.58 | 0.015 | 0.40 | 0.003 | XM_130887.1 | 2810407E23Rik | UNKNOWN                                                           |
| Down at both hrs | A_65_P16257 | 0.58 | 0.002 | 0.50 | 0.004 |             |               | Intronic in U022488                                               |
| Down at both hrs | A_65_P16913 | 0.58 | 0.027 | 0.56 | 0.036 |             |               | UNKNOWN                                                           |
| Down at both hrs | A_65_P13913 | 0.57 | 0.020 | 0.49 | 0.030 | AK019934.1  | 1500041B16Rik | weakly similar to HYPOTHETICAL 18.5 KDA PROTEIN (FRAGMENT) [Homo  |
| Down at both hrs | A_65_P10883 | 0.57 | 0.018 | 0.44 | 0.026 | NM_013615.1 | Odf2          | Mus musculus outer dense fiber of sperm tails 2 (Odf2), mRNA      |
| Down at both hrs | A_65_P18472 | 0.56 | 0.049 | 0.37 | 0.013 |             | Nrp           | Mus musculus neuropilin (Nrp), mRNA                               |
| Down at both hrs | A_65_P12334 | 0.56 | 0.033 | 0.52 | 0.015 |             |               | Intronic in U038352                                               |
| Down at both hrs | A_65_P12014 | 0.56 | 0.015 | 0.52 | 0.025 |             |               | hypothetical Restriction endonuclease-like structure containing p |
| Down at both hrs | A_65_P11177 | 0.55 | 0.003 | 0.40 | 0.047 | XM_142211.1 |               | A KINASE ANCHOR PROTEIN 11 PROTEIN KINASE A ANCHORING PROTEIN 11  |
| Down at both hrs | A_65_P18946 | 0.54 | 0.035 | 0.57 | 0.047 |             | Ltap          | Mus musculus loop tail associated protein (Ltap), mRNA            |
| Down at both hrs | A_65_P16458 | 0.54 | 0.001 | 0.61 | 0.022 | XM_132290.1 | 2810021H22Rik | ATP DEPENDENT RNA HELICASE DEAD BOX PROTEIN                       |
| Down at both hrs | A_65_P13572 | 0.53 | 0.028 | 0.61 | 0.025 |             |               | UNKNOWN                                                           |
| Down at both hrs | A_65_P17505 | 0.53 | 0.013 | 0.52 | 0.009 | NM_023879.1 | Rpgrip1       | Mus musculus retinitis pigmentosa GTPase regulator interacting pr |
| Down at both hrs | A_65_P16904 | 0.53 | 0.046 | 0.41 | 0.040 |             |               | Intronic in U015265                                               |
| Down at both hrs | A_65_P16733 | 0.53 | 0.029 | 0.43 | 0.011 |             |               | Intronic in U042642                                               |
| Down at both hrs | A_65_P20184 | 0.52 | 0.011 | 0.43 | 0.019 |             |               | UNKNOWN                                                           |
| Down at both hrs | A_65_P14969 | 0.52 | 0.029 | 0.53 | 0.012 |             |               | REPEAT-SEQUENCE                                                   |
| Down at both hrs | A_65_P19242 | 0.52 | 0.014 | 0.56 | 0.024 | AK084901.1  |               | Similar to: Mus musculus 13 days embryo lung cDNA, RIKEN full-len |
| Down at both hrs | A_65_P09575 | 0.52 | 0.016 | 0.40 | 0.003 |             |               | Intronic in U008452                                               |
| Down at both hrs | A_65_P16540 | 0.52 | 0.038 | 0.39 | 0.023 | NM_153557.1 | MGC36831      | Mus musculus hypothetical protein MGC36831 (MGC36831), mRNA       |
| Down at both hrs | A_65_P15113 | 0.52 | 0.007 | 0.50 | 0.004 |             |               | UNKNOWN                                                           |
| Down at both hrs | A_65_P15774 | 0.51 | 0.003 | 0.62 | 0.004 | XM_124694.1 | Lnx2          | Mus musculus ligand of numb-protein X 2 (Lnx2), mRNA              |
| Down at both hrs | A_65_P19850 | 0.51 | 0.032 | 0.53 | 0.048 | NM_001949.2 | E2f3          | TRANSCRIPTION FACTOR E2F3 (E2F-3) (FRAGMENT). [Source:SWISSPROT;A |
| Down at both hrs | A_65_P18742 | 0.51 | 0.027 | 0.38 | 0.044 |             | Epcs3         | UNKNOWN                                                           |
| Down at both hrs | A_65_P15506 | 0.50 | 0.001 | 0.43 | 0.001 |             |               | UNKNOWN                                                           |
| Down at both hrs | A_65_P12509 | 0.50 | 0.032 | 0.40 | 0.037 |             |               | UNKNOWN                                                           |
| Down at both hrs | A_65_P16053 | 0.50 | 0.006 | 0.49 | 0.001 | NM_012197.2 | GAPCENA       | Mus musculus hypothetical protein MGC30493 (MGC30493), mRNA       |
| Down at both hrs | A_65_P15974 | 0.50 | 0.040 | 0.32 | 0.034 | NM_021496.1 | Pvrl3         | Mus musculus poliovirus receptor-related 3 (Pvrl3), mRNA          |
| Down at both hrs | A_65_P14927 | 0.50 | 0.025 | 0.32 | 0.029 | NM_172146.1 | MGC38417      | AMIDOPHOSPHORIBOSYLTRANSFERASE PRECURSOR EC 2.4.2.14 GLUTAMINE PH |
| Down at both hrs | A_65_P13447 | 0.50 | 0.008 | 0.51 | 0.025 |             |               | UNKNOWN                                                           |
| Down at both hrs | A_65_P18621 | 0.50 | 0.010 | 0.57 | 0.043 | NM_172392.1 | LOC268670     | TESTIS SPECIFIC PROTEIN A (ZINC FINGER PROTEIN TSGA) homolog [Rat |
| Down at both hrs | A_65_P13339 | 0.49 | 0.008 | 0.31 | 0.000 |             |               | UNKNOWN                                                           |
| Down at both hrs | A_65_P11918 | 0.49 | 0.022 | 0.50 | 0.009 |             | D1Etd53e      | UNKNOWN                                                           |
| Down at both hrs | A_65_P12417 | 0.48 | 0.033 | 0.43 | 0.049 |             |               | Intronic in U043388                                               |
| Down at both hrs | A_65_P11805 | 0.48 | 0.047 | 0.65 | 0.006 |             | AW742696      | UNKNOWN                                                           |
| Down at both hrs | A_65_P15151 | 0.48 | 0.045 | 0.22 | 0.040 | NM_011746.1 | Mkrm3         | Mus musculus makorin, ring finger protein, 3 (Mkrm3), mRNA        |
| Down at both hrs | A_65_P17481 | 0.47 | 0.022 | 0.40 | 0.015 |             | C81364        | Intronic in U043709                                               |
| Down at both hrs | A_65_P14662 | 0.47 | 0.017 | 0.35 | 0.040 | NM_145742.1 | 1200009D07Rik | UNKNOWN                                                           |
| Down at both hrs | A_65_P11468 | 0.47 | 0.035 | 0.44 | 0.007 |             |               | Intronic in U035656                                               |
| Down at both hrs | A_65_P18971 | 0.47 | 0.044 | 0.36 | 0.029 |             |               | UNKNOWN                                                           |
| Down at both hrs | A_65_P14069 | 0.47 | 0.026 | 0.33 | 0.021 |             |               | UNKNOWN                                                           |
| Down at both hrs | A_65_P14288 | 0.47 | 0.015 | 0.36 | 0.021 |             |               | Intronic in U036261                                               |
| Down at both hrs | A_65_P17502 | 0.47 | 0.015 | 0.39 | 0.018 |             |               | Intronic in U032193                                               |
| Down at both hrs | A_65_P18057 | 0.46 | 0.020 | 0.48 | 0.042 | AK019142.1  | 2810409H07Rik | Mus musculus RIKEN cDNA 2810409H07 gene (2810409H07Rik), mRNA     |
| Down at both hrs | A_65_P19230 | 0.46 | 0.019 | 0.26 | 0.023 |             | LOC218236     | Intronic in U034755                                               |
| Down at both hrs | A_65_P18823 | 0.45 | 0.029 | 0.25 | 0.001 | NM_026211.1 | 2400003B06Rik | Mus musculus RIKEN cDNA 2400003B06 gene (2400003B06Rik), mRNA     |
| Down at both hrs | A_65_P15418 | 0.45 | 0.025 | 0.23 | 0.039 | BC038035.1  | Apbb2         | AMYLOID BETA A4 PRECURSOR PROTEIN BINDING FAMILY B MEMBER FE65    |
| Down at both hrs | A_65_P17405 | 0.44 | 0.015 | 0.37 | 0.006 | NM_153391.1 | PWDMP         | REPEAT-SEQUENCE                                                   |
| Down at both hrs | A_65_P17009 | 0.44 | 0.002 | 0.35 | 0.028 | AB015196.1  | p70s6k/p85s6k | RIBOSOMAL PROTEIN S6 KINASE ALPHA EC 2.7.1.- S6K ALPHA KDA RIBOSO |
| Down at both hrs | A_65_P16532 | 0.43 | 0.043 | 0.33 | 0.004 |             |               | UNKNOWN                                                           |
| Down at both hrs | A_65_P15962 | 0.43 | 0.004 | 0.46 | 0.020 |             |               | UNKNOWN                                                           |
| Down at both hrs | A_65_P19602 | 0.43 | 0.020 | 0.36 | 0.027 | NM_029763.1 | 2810411G20Rik | Mus musculus RIKEN cDNA 2810411G20 gene (2810411G20Rik), mRNA     |
| Down at both hrs | A_65_P15586 | 0.43 | 0.028 | 0.45 | 0.002 |             |               | Intronic in U034653                                               |
| Down at both hrs | A_65_P15025 | 0.42 | 0.015 | 0.27 | 0.041 |             | C85067        | UNKNOWN                                                           |

|                         |             |      |       |      |       |             |                                                                                   |
|-------------------------|-------------|------|-------|------|-------|-------------|-----------------------------------------------------------------------------------|
| Down at both hrs        | A_65_P15163 | 0.42 | 0.012 | 0.16 | 0.018 |             | Intronic in U015096                                                               |
| Down at both hrs        | A_65_P12895 | 0.41 | 0.045 | 0.47 | 0.029 | NM_014932.1 | UNKNOWN                                                                           |
| Down at both hrs        | A_65_P18144 | 0.41 | 0.003 | 0.55 | 0.032 | NM_172765.1 | LOC235132<br>ZINC FINGER PROTEIN                                                  |
| Down at both hrs        | A_65_P15772 | 0.41 | 0.013 | 0.14 | 0.030 | AK019500.1  | Nsap1-pending<br>Mus musculus NS1-associated protein 1-like (Nsap1-pending), mRNA |
| Down at both hrs        | A_65_P17774 | 0.40 | 0.035 | 0.28 | 0.005 | NM_144542.1 | A930014112Rik<br>Mus musculus RIKEN cDNA A930014112 gene (A930014112Rik), mRNA    |
| Down at both hrs        | A_65_P18943 | 0.40 | 0.007 | 0.36 | 0.035 |             | Intronic in U013121                                                               |
| Down at both hrs        | A_65_P17629 | 0.40 | 0.048 | 0.37 | 0.007 |             | UNKNOWN                                                                           |
| Down at both hrs        | A_65_P20703 | 0.38 | 0.016 | 0.27 | 0.036 | XM_127136.2 | CYTOSOLIC SORTING PROTEIN PACS                                                    |
| Down at both hrs        | A_65_P14974 | 0.37 | 0.039 | 0.12 | 0.034 |             | weakly similar to PUTATIVE O-METHYLTRANSFERASE (FRAGMENT) [Rhodot                 |
| Down at both hrs        | A_65_P15966 | 0.37 | 0.022 | 0.26 | 0.000 |             | UNKNOWN                                                                           |
| Down at both hrs        | A_65_P12312 | 0.37 | 0.049 | 0.35 | 0.033 |             | Actg<br>UNKNOWN                                                                   |
| Down at both hrs        | A_65_P18146 | 0.37 | 0.003 | 0.32 | 0.006 | XM_181307.1 | 2410012H22Rik<br>Mus musculus RIKEN cDNA 2410012H22 gene (2410012H22Rik), mRNA    |
| Down at both hrs        | A_65_P10882 | 0.36 | 0.020 | 0.18 | 0.025 | NM_019994.2 | Tulip1-pending<br>Mus musculus tuberin-like protein 1 (Tulip1-pending), mRNA      |
| Down at both hrs        | A_65_P18340 | 0.35 | 0.005 | 0.51 | 0.030 | AK019500.1  | Nsap1-pending<br>Mus musculus NS1-associated protein 1-like (Nsap1-pending), mRNA |
| Down at both hrs        | A_65_P16153 | 0.35 | 0.006 | 0.26 | 0.005 |             | weakly similar to CDNA FLJ31910 FIS, CLONE NT2RP7004687, WEAKLY S                 |
| Down at both hrs        | A_65_P17604 | 0.32 | 0.020 | 0.30 | 0.011 |             | Intronic in U030635                                                               |
| Down at both hrs        | A_65_P13219 | 0.32 | 0.009 | 0.44 | 0.041 |             | UNKNOWN                                                                           |
| Down at both hrs        | A_65_P19463 | 0.30 | 0.045 | 0.29 | 0.034 |             | UNKNOWN                                                                           |
| Down at both hrs        | A_65_P16559 | 0.30 | 0.003 | 0.40 | 0.022 | NM_009132.1 | Scin<br>Mus musculus scinderin (Scin), mRNA                                       |
| Up at 6, down at 24 hrs | A_65_P11311 | 1.25 | 0.007 | 0.83 | 0.001 | XM_148824.2 | UNKNOWN                                                                           |
| Up at 6, down at 24 hrs | A_65_P09490 | 1.14 | 0.018 | 0.92 | 0.033 |             | UNKNOWN                                                                           |
| Down at 6, up at 24 hrs | A_65_P01948 | 0.81 | 0.024 | 1.30 | 0.019 | C81304      | UNKNOWN<br>CYCLIN T1 CYCLIN T                                                     |
