# Supplementary material
Source: PubMed Central journal article supplement (PMC3000614)
Supplement: NIHMS234792-supplement-Table_S2.pdf [file NIHMS234792-supplement-Table_S2.pdf]

Table S2. Major GO categories with GH responsive genes.

| Categories           | GOID  | GO Name                                              | Changed | Measured | In GO | Changed (%) | Present (%) | Z Score | PermuteP |
|----------------------|-------|------------------------------------------------------|---------|----------|-------|-------------|-------------|---------|----------|
| up 6 hr              | 10001 | glial cell differentiation                           | 3       | 5        | 9     | 60.00       | 55.56       | 3.381   | 0.013    |
| up 6 hr              | 7229  | integrin-mediated signaling pathway                  | 7       | 30       | 49    | 23.33       | 61.22       | 2.585   | 0.015    |
| up 6 hr              | 6164  | purine nucleotide biosynthesis                       | 3       | 6        | 10    | 50.00       | 60.00       | 2.404   | 0.025    |
| up 6 hr, 24 hr, comb | 16338 | calcium-independent cell-cell adhesion               | 4       | 10       | 20    | 40.00       | 50.00       | 3.287   | 0.011    |
| up 6 hr, comb        | 5975  | carbohydrate metabolism                              | 9       | 74       | 177   | 12.16       | 41.81       | 2.868   | 0.013    |
| up 6 hr, down 24 hr  | 16192 | vesicle-mediated transport                           | 6       | 31       | 48    | 19.35       | 64.58       | 2.284   | 0.027    |
| down 6 hr            | 6338  | chromatin remodeling                                 | 3       | 18       | 27    | 16.67       | 66.67       | 2.564   | 0.026    |
| down 6 hr            | 7368  | determination of left/right symmetry                 | 3       | 10       | 23    | 30.00       | 43.48       | 2.952   | 0.027    |
| down 6 hr            | 7186  | G-protein coupled receptor protein signaling pathway | 12      | 87       | 1360  | 13.79       | 6.40        | 2.267   | 0.029    |
| down 6 hr            | 7507  | heart development                                    | 7       | 39       | 68    | 17.95       | 57.35       | 2.259   | 0.032    |
| down 6 hr            | 184   | mRNA catabolism, nonsense-mediated decay             | 3       | 8        | 10    | 37.50       | 80.00       | 3.49    | 0.011    |
| down 6 hr            | 42475 | odontogenesis (sensu Vertebrata)                     | 4       | 11       | 16    | 36.36       | 68.75       | 5.169   | 0.001    |
| up 24 hr             | 6865  | amino acid transport                                 | 7       | 17       | 42    | 41.18       | 40.48       | 2.613   | 0.016    |
| up 24 hr             | 51085 | chaperone cofactor dependent protein folding         | 4       | 9        | 10    | 44.44       | 90.00       | 2.906   | 0.023    |
| up 24 hr             | 1755  | neural crest cell migration                          | 3       | 6        | 9     | 50.00       | 66.67       | 2.784   | 0.015    |
| up 24 hr             | 8654  | phospholipid biosynthesis                            | 4       | 14       | 20    | 28.57       | 70.00       | 2.752   | 0.017    |
| up 24 hr             | 42102 | positive regulation of T cell proliferation          | 3       | 6        | 11    | 50.00       | 54.55       | 2.19    | 0.041    |
| up 24 hr             | 8360  | regulation of cell shape                             | 6       | 20       | 34    | 30.00       | 58.82       | 2.377   | 0.033    |
| up 24 hr             | 6885  | regulation of pH                                     | 4       | 9        | 16    | 44.44       | 56.25       | 2.906   | 0.01     |
| up 24 hr, comb       | 7411  | axon guidance                                        | 6       | 22       | 44    | 27.27       | 50.00       | 2.585   | 0.015    |
| up 24 hr, comb       | 1568  | blood vessel development                             | 3       | 9        | 15    | 33.33       | 60.00       | 2.582   | 0.013    |
| up 24 hr, comb       | 7155  | cell adhesion                                        | 20      | 114      | 261   | 17.54       | 43.68       | 2.352   | 0.021    |
| down 24 hr           | 30183 | B cell differentiation                               | 3       | 7        | 15    | 42.86       | 46.67       | 2.673   | 0.009    |
| down 24 hr           | 6888  | ER to Golgi transport                                | 9       | 32       | 52    | 28.13       | 61.54       | 2.736   | 0.009    |
| down 24 hr           | 30520 | estrogen receptor signaling pathway                  | 3       | 6        | 7     | 50.00       | 85.71       | 2.815   | 0.036    |
| down 24 hr           | 82    | G1/S transition of mitotic cell cycle                | 5       | 14       | 19    | 35.71       | 73.68       | 2.673   | 0.032    |
| down 24 hr           | 6406  | mRNA export from nucleus                             | 6       | 13       | 16    | 46.15       | 81.25       | 3.273   | 0.005    |
| down 24 hr           | 7405  | neuroblast proliferation                             | 3       | 4        | 8     | 75.00       | 50.00       | 3.822   | 0.008    |
| down 24 hr           | 6457  | protein folding                                      | 22      | 114      | 183   | 19.30       | 62.30       | 2.036   | 0.028    |
| down 24 hr           | 43087 | regulation of GTPase activity                        | 5       | 16       | 29    | 31.25       | 55.17       | 2.313   | 0.045    |
| up comb              | 7409  | axonogenesis                                         | 5       | 14       | 37    | 35.71       | 37.84       | 2.797   | 0.002    |
| up comb              | 8643  | carbohydrate transport                               | 3       | 9        | 12    | 33.33       | 75.00       | 2.098   | 0.048    |
| up comb              | 30154 | cell differentiation                                 | 22      | 123      | 228   | 17.89       | 53.95       | 2.001   | 0.048    |
| up comb              | 16477 | cell migration                                       | 3       | 13       | 25    | 23.08       | 52.00       | 2.266   | 0.032    |
| up comb              | 7275  | development                                          | 22      | 136      | 300   | 16.18       | 45.33       | 2.948   | 0.008    |
| up comb              | 6006  | glucose metabolism                                   | 3       | 9        | 41    | 33.33       | 21.95       | 2.051   | 0.043    |
| up comb              | 6096  | glycolysis                                           | 6       | 23       | 88    | 26.09       | 26.14       | 2.098   | 0.038    |
| up comb              | 6811  | ion transport                                        | 19      | 89       | 258   | 21.35       | 34.50       | 1.968   | 0.05     |
| up comb              | 7612  | learning                                             | 3       | 8        | 11    | 37.50       | 72.73       | 2.596   | 0.04     |
| up comb              | 16044 | membrane organization and biogenesis                 | 3       | 5        | 10    | 60.00       | 50.00       | 2.489   | 0.018    |

|           |                                                                       |    |     |     |       |       |       |       |
|-----------|-----------------------------------------------------------------------|----|-----|-----|-------|-------|-------|-------|
| up comb   | 7517 muscle development                                               | 14 | 34  | 72  | 41.18 | 47.22 | 2.903 | 0.009 |
| up comb   | 6468 protein amino acid phosphorylation                               | 51 | 267 | 480 | 19.10 | 55.63 | 1.998 | 0.05  |
| up comb   | 8360 regulation of cell shape                                         | 8  | 20  | 34  | 40.00 | 58.82 | 3.303 | 0.001 |
| up comb   | 7169 transmembrane receptor protein tyrosine kinase signaling pathway | 9  | 35  | 66  | 25.71 | 53.03 | 2.272 | 0.029 |
| down comb | 7049 cell cycle                                                       | 14 | 166 | 219 | 8.43  | 75.80 | 3.157 | 0.005 |
| down comb | 51301 cell division                                                   | 9  | 90  | 123 | 10.00 | 73.17 | 3.622 | 0.002 |
| down comb | 6397 mRNA processing                                                  | 3  | 40  | 56  | 7.50  | 71.43 | 3.657 | 0     |
| down comb | 398 nuclear mRNA splicing, via spliceosome                            | 6  | 68  | 92  | 8.82  | 73.91 | 3.189 | 0.003 |
| down comb | 6412 protein biosynthesis                                             | 12 | 162 | 443 | 7.41  | 36.57 | 3.299 | 0.002 |

up 6 hr = genes significantly up-regulated by GH at 6 hours.

down 6 hr = genes significantly up-regulated by GH at 6 hours.

up 24 hr = genes significantly up-regulated by GH at 6 hours.

down 24 hr = genes significantly up-regulated by GH at 6 hours.

up or down comb = combined analysis of the data at 6 and 24 hours.
